# Supplementary material for: Genetic Diversity and Population Structure in a Legacy Collection of Spring Barley Landraces Adapted to a Wide Range of Climates
Source: PLoS One. 2014 Dec 26;9(12):e116164. doi: 10.1371/journal.pone.0116164 (PMC4277474; doi:10.1371/journal.pone.0116164)
Supplement: S2 Table — Final SSR data set for the whole collection of 1491 barley landraces investigated. Fragment sizes and 0/1 matrix are provided. (XLSX) [file pone.0116164.s013.xlsx]

## Sheet: Fragment length
Table S2
Entry no.	SampleName	Accession name1	Taxonomical classification	Row type (2 vs. 6)	Naked/Hulled	Row type (further information)	Country of origin	GBM1002	GBM1002	GBM1003	GBM1003	GBM1007	GBM1007	GBM1008	GBM1008	GBM1013	GBM1013	GBM1015	GBM1015	GBM1018	GBM1018	GBM1020	GBM1020	GBM1021	GBM1021	GBM1026	GBM1026	GBM1029	GBM1029	GBM1031	GBM1031	GBM1033	GBM1033	GBM1035	GBM1035	GBM1047	GBM1047	GBM1054	GBM1054	GBM1060	GBM1060	GBM1061	GBM1061	GBM1063	GBM1063	GBM1064	GBM1064	GBM1075	GBM1075
1	01_3	BCC3	Hordeum vulgare L. convar. distichon (L.) Alef. var. nutans (Rode) Alef.	2	H		Afghanistan	336	336	204	204	212	212	174	174	174	174	202	202	267	267	246	246	254	264	214	214	228	228	290	290	276	276	276	276	216	216	264	264	210	210	339	345	204	204	288	288	294	294
2	02_1	HOR1377	Hordeum vulgare L. convar. distichon (L.) Alef. var. nutans (Rode) Alef.	2	H		Afghanistan	336	336	204	204	210	210	180	180	174	174	202	202	267	267	246	246	264	264	214	214	228	228	290	290	276	276	276	276	216	216	264	264	210	210	324	324	204	204	296	296	294	294
3	03_2	HOR1512	Hordeum vulgare L. convar. distichon (L.) Alef. var. nigrescens Körn.	2	H		Afghanistan	351	351	195	195	202	202	180	180	174	174	230	230	264	264	246	246	266	266	214	214	224	224	290	290	282	282	282	282	210	210	264	264	207	207	351	351	208	208	296	296	302	302
4	04_2	HOR1675	Hordeum vulgare L. convar. distichon (L.) Alef. var. medicum Körn.	2	H		Afghanistan	351	351	195	195	202	202	162	162	174	174	194	194	264	264	246	246	264	264	212	212	228	228	290	290	274	274	280	280	213	213	267	267	210	210	351	351	200	200	284	284	302	302
5	05_1	HOR1707	Hordeum vulgare L. convar. distichon (L.) Alef. var. nutans (Rode) Alef.	2	H		Afghanistan	351	351	201	201	206	206	174	174	174	174	202	202	267	267	244	244	266	266	216	216	224	224	290	290	274	274	280	280	213	213	264	264	210	210	351	351	204	204	296	296	302	302
7	07_3	HOR1751	Hordeum vulgare L. convar. distichon (L.) Alef. var. nutans (Rode) Alef.	2	H		Afghanistan	351	351	201	201	210	210	174	174	174	174	222	222	264	264	244	244	270	270	214	214	224	224	290	290	274	274	276	276	213	213	264	264	210	210	351	351	208	208	296	296	304	304
8	08_1	HOR1794	Hordeum vulgare L. convar. distichon (L.) Alef. var. nutans (Rode) Alef.	2	H		Afghanistan	351	351	195	195	212	212	177	177	174	174	202	202	264	264	244	244	264	264	214	214	228	228	290	290	274	274	276	276	216	216	264	264	210	210	345	345	200	200	296	296	294	294
9	09_1	HOR4467	Hordeum vulgare L. convar. distichon (L.) Alef. var. nutans (Rode) Alef.	2	H		Afghanistan	351	351	201	201	210	210	174	165	174	174	230	230	264	264	244	244	270	270	214	214	224	224	290	290	274	274	276	276	213	213	264	264	210	210	351	351	208	208	296	296	304	304
10	10_4	HOR4826	Hordeum vulgare L. convar. distichon (L.) Alef. var. nutans (Rode) Alef.	2	H		Afghanistan	336	336	204	204	210	210	171	180	171	171	202	202	267	267	-99999	-99999	264	264	214	214	228	228	290	290	276	276	276	276	216	216	264	264	210	210	324	324	204	204	296	296	294	294
11	11_4	BCC2	Hordeum vulgare L. convar. distichon (L.) Alef.	2	H		Afghanistan	336	336	204	204	212	212	180	180	174	174	202	202	267	267	246	246	264	264	214	214	228	228	292	292	276	276	276	276	216	216	264	264	210	210	345	345	204	204	288	288	302	302
12	12_2	HOR754	Hordeum vulgare L. convar. distichon (L.) Alef. var. nutans (Rode) Alef.	2	H		Albania	351	351	195	195	200	200	177	177	174	174	230	230	264	264	244	244	256	256	212	212	224	224	290	290	274	274	280	280	213	213	258	258	207	207	351	351	204	204	296	296	302	302
13	13_4	HOR938	Hordeum vulgare L. convar. distichon (L.) Alef. var. nutans (Rode) Alef.	2	H		Albania	351	351	210	210	202	202	165	174	174	174	222	222	264	264	244	244	256	256	212	212	224	224	292	292	274	274	-99999	-99999	213	213	258	258	207	207	351	351	196	196	-99999	-99999	302	302
14	14_2	HOR939	Hordeum vulgare L. convar. distichon (L.) Alef. var. nutans (Rode) Alef.	2	H		Albania	351	351	195	195	202	202	177	177	174	174	230	230	264	264	244	244	256	256	214	214	230	230	290	290	282	282	280	280	213	213	258	258	207	207	351	351	204	204	296	296	302	302
15	15_1	HOR964	Hordeum vulgare L. convar. distichon (L.) Alef. var. nutans (Rode) Alef.	2	H		Albania	351	351	195	195	206	206	174	174	174	174	214	214	264	264	244	244	254	254	212	212	224	224	292	292	282	282	280	280	213	213	264	264	210	210	351	351	200	200	296	296	302	302
16	16_2	HOR965	Hordeum vulgare L. convar. distichon (L.) Alef. var. nutans (Rode) Alef.	2	H		Albania	351	351	195	195	200	200	174	174	174	174	230	230	264	264	246	246	266	266	212	212	224	224	290	290	282	282	280	280	213	213	264	264	207	207	351	351	204	204	296	296	302	302
17	17_2	HOR1270	Hordeum vulgare L. convar. distichon (L.) Alef. var. nutans (Rode) Alef.	2	H		Albania	351	351	195	195	210	210	174	174	174	174	226	226	264	264	244	244	254	254	214	214	224	224	290	290	282	282	280	280	213	213	258	258	210	210	336	336	204	204	296	296	304	304
18	18_4	HOR1389	Hordeum vulgare L. convar. distichon (L.) Alef. var. nutans (Rode) Alef.	2	H		Albania	351	351	195	195	202	202	174	174	174	174	230	230	264	264	244	244	254	254	214	214	224	224	292	292	282	282	280	280	213	213	258	258	210	210	351	351	204	204	296	296	304	304
19	19_4	HOR10092	Hordeum vulgare L. convar. distichon (L.) Alef. var. nutans (Rode) Alef.	2	H		Algeria	351	351	195	195	200	200	177	177	174	174	230	230	267	267	244	244	254	254	214	214	228	228	286	286	274	274	276	276	213	213	267	267	210	210	336	336	204	204	300	300	294	294
20	20_1	HOR4468	Hordeum vulgare L. convar. distichon (L.) Alef. var. nutans (Rode) Alef.	2	H		Armenia	351	351	201	201	212	212	174	174	174	174	230	230	267	267	244	244	254	254	214	214	224	224	284	284	274	274	280	280	213	213	264	264	210	210	351	351	208	208	296	296	304	304
21	21_3	HOR4724	Hordeum vulgare L. convar. distichon (L.) Alef. var. nutans (Rode) Alef.	2	H		Armenia	351	351	210	210	220	220	174	174	174	174	230	230	267	267	244	244	264	264	214	214	224	224	290	290	274	274	278	278	213	213	267	267	207	207	351	351	208	208	296	296	302	302
22	22_3	HOR4728	Hordeum vulgare L. convar. distichon (L.) Alef. var. nutans (Rode) Alef.	2	H		Armenia	351	351	201	201	212	212	174	174	174	174	226	230	267	267	244	244	254	254	214	214	224	224	290	290	274	274	280	280	213	213	264	264	213	213	351	351	204	204	296	296	294	294
24	24_3	HOR10707	Hordeum vulgare L. convar. distichon (L.) Alef. var. nutans (Rode) Alef.	2	H		Armenia	351	351	201	201	212	212	174	174	174	174	230	230	267	267	244	244	254	254	214	214	224	224	292	292	274	274	280	280	213	213	264	264	210	210	351	351	208	208	296	296	304	304
25	25_4	HOR91	Hordeum vulgare L. convar. distichon (L.) Alef. var. erectum (Rode) Alef.	2	H		Austria	351	351	195	195	202	202	174	174	174	174	230	230	264	264	244	244	264	264	212	212	224	224	284	284	282	282	276	276	210	210	267	267	207	207	351	351	208	208	296	296	294	294
26	26_1	HOR108	Hordeum vulgare L. convar. distichon (L.) Alef. var. erectum (Rode) Alef.	2	H		Austria	351	351	195	195	200	200	174	174	174	174	230	230	264	264	244	244	264	264	212	212	224	224	284	284	274	274	276	276	210	210	267	267	210	210	351	351	208	208	296	296	294	294
27	27_2	HOR814	Hordeum vulgare L. convar. distichon (L.) Alef. var. erectum (Rode) Alef.	2	H		Austria	351	351	195	195	202	202	174	174	174	174	230	230	264	264	244	244	264	264	212	212	224	224	284	284	282	282	276	276	210	210	267	267	207	207	351	351	208	208	296	296	294	294
28	28_3	HOR825	Hordeum vulgare L. convar. distichon (L.) Alef. var. nutans (Rode) Alef.	2	H		Austria	351	351	195	195	200	200	177	177	174	174	226	226	264	264	244	244	264	264	212	212	224	224	284	284	274	274	276	276	216	216	258	258	210	210	336	336	208	208	296	296	294	294
29	29_3	HOR826	Hordeum vulgare L. convar. distichon (L.) Alef. var. nutans (Rode) Alef.	2	H		Austria	351	351	-99999	-99999	200	200	177	177	174	174	226	226	264	264	244	244	264	264	212	212	224	224	284	284	274	274	276	276	216	216	258	258	210	210	336	336	208	208	296	296	294	294
30	30_3	HOR828	Hordeum vulgare L. convar. distichon (L.) Alef. var. nutans (Rode) Alef.	2	H		Austria	351	351	195	195	200	200	174	174	174	174	274	274	264	264	246	246	264	264	212	212	224	224	284	284	274	274	280	280	210	210	267	267	210	210	351	351	208	208	296	296	302	302
31	31_1	HOR947	Hordeum vulgare L. convar. distichon (L.) Alef. var. nutans (Rode) Alef.	2	H		Austria	351	351	195	195	200	208	174	174	174	174	230	230	264	264	244	244	254	254	214	214	228	228	286	286	282	282	280	280	216	216	267	267	210	210	351	351	208	208	296	296	294	294
32	32_2	HOR1174	Hordeum vulgare L. convar. distichon (L.) Alef. var. nutans (Rode) Alef.	2	H		Austria	351	351	195	195	200	200	177	177	174	174	226	226	264	264	244	244	264	264	212	212	224	224	284	284	274	274	276	276	216	216	258	258	210	210	336	336	208	208	296	296	294	294
34	34_1	HOR2348	Hordeum vulgare L. convar. distichon (L.) Alef. var. erectum (Rode) Alef.	2	H		Austria	351	351	195	195	202	202	174	174	174	174	230	230	264	264	246	246	264	264	212	212	224	224	284	284	274	274	280	280	210	210	267	267	207	207	351	351	208	208	296	296	294	294
35	35_3	HOR2404	Hordeum vulgare L. convar. distichon (L.) Alef. var. erectum (Rode) Alef.	2	H		Austria	351	351	195	195	210	210	174	174	174	174	266	266	264	264	244	244	264	264	212	212	228	228	284	284	274	274	280	280	210	210	267	267	210	210	351	351	208	208	296	296	294	294
36	36_1	HOR3746	Hordeum vulgare L. convar. distichon (L.) Alef. var. nutans (Rode) Alef.	2	H		Austria	351	351	195	195	200	200	180	180	174	174	222	222	264	264	246	246	254	254	212	212	224	224	284	284	282	282	276	276	216	216	258	258	207	207	351	351	208	208	296	296	302	302
37	37_4	HOR3949	Hordeum vulgare L. convar. distichon (L.) Alef. var. nutans (Rode) Alef.	2	H		Austria	351	351	195	195	200	200	177	177	174	174	218	218	264	264	246	246	264	264	212	212	224	224	284	284	282	282	280	280	216	216	258	258	210	210	351	351	208	208	296	296	294	294
38	38_1	HOR3950	Hordeum vulgare L. convar. distichon (L.) Alef. var. nutans (Rode) Alef.	2	H		Austria	351	351	195	195	200	200	177	177	174	174	230	230	264	264	246	246	264	264	212	212	224	224	284	284	282	282	280	280	216	216	258	258	210	210	351	351	208	208	296	296	302	302
39	39_3	HOR3951	Hordeum vulgare L. convar. distichon (L.) Alef. var. nutans (Rode) Alef.	2	H		Austria	351	351	195	195	200	200	177	177	174	174	230	230	264	264	246	246	264	264	212	212	-99999	-99999	284	284	282	282	280	280	-99999	-99999	258	258	210	210	351	351	208	208	296	296	302	302
40	40_2	HOR3952	Hordeum vulgare L. convar. distichon (L.) Alef. var. nutans (Rode) Alef.	2	H		Austria	351	351	195	195	200	200	162	162	174	174	222	222	264	264	246	246	254	254	214	214	228	228	286	286	282	282	280	280	213	213	267	267	210	210	336	336	208	208	296	296	294	294
41	41_2	HOR3953	Hordeum vulgare L. convar. distichon (L.) Alef. var. nutans (Rode) Alef.	2	H		Austria	351	351	195	195	202	202	183	183	174	174	214	214	264	264	246	246	264	264	214	214	228	228	286	286	282	282	282	282	213	213	258	258	210	210	336	336	208	208	300	300	302	302
42	42_2	HOR3954	Hordeum vulgare L. convar. distichon (L.) Alef. var. nutans (Rode) Alef.	2	H		Austria	351	351	195	195	200	200	174	174	174	174	230	230	264	264	246	246	256	256	212	212	224	224	284	284	282	282	280	280	216	216	267	267	207	207	351	351	208	208	296	296	302	302
43	43_2	HOR3955	Hordeum vulgare L. convar. distichon (L.) Alef. var. nutans (Rode) Alef.	2	H		Austria	351	351	195	195	200	200	174	174	174	174	230	230	264	264	246	246	254	254	212	212	224	224	284	284	274	274	280	280	216	216	267	267	210	210	351	351	208	208	296	296	294	294
44	44_1	HOR3956	Hordeum vulgare L. convar. distichon (L.) Alef. var. nutans (Rode) Alef.	2	H		Austria	351	351	195	195	200	200	-99999	-99999	174	174	230	230	267	267	246	246	264	264	214	214	228	228	284	284	282	282	280	280	213	213	258	258	210	210	336	336	208	208	296	296	302	302
45	45_2	HOR3957	Hordeum vulgare L. convar. distichon (L.) Alef. var. nutans (Rode) Alef.	2	H		Austria	351	351	195	195	200	200	177	177	174	174	222	222	264	264	246	246	264	264	214	214	224	224	284	284	282	282	276	276	216	216	258	258	207	207	351	351	208	208	296	296	294	294
46	46_3	HOR3958	Hordeum vulgare L. convar. distichon (L.) Alef. var. nutans (Rode) Alef.	2	H		Austria	351	351	195	195	200	200	162	162	174	174	214	214	264	264	246	246	254	254	212	212	224	224	284	284	282	282	278	278	216	216	258	258	210	210	351	351	208	208	296	296	294	294
47	47_2	HOR3963	Hordeum vulgare L. convar. distichon (L.) Alef. var. nutans (Rode) Alef.	2	H		Austria	351	351	195	195	200	200	177	177	174	174	222	222	264	264	246	246	254	254	214	214	224	224	284	284	282	282	276	276	216	216	267	267	207	207	351	351	208	208	296	296	294	294
48	48_1	HOR3967	Hordeum vulgare L. convar. distichon (L.) Alef. var. erectum (Rode) Alef.	2	H		Austria	351	351	195	195	200	200	174	174	174	174	222	230	264	264	244	244	264	264	212	212	224	224	284	284	274	274	276	276	210	210	267	267	210	210	351	351	208	208	296	296	294	294
49	49_2	HOR9848	Hordeum vulgare L. convar. distichon (L.) Alef. var. nutans (Rode) Alef.	2	H		Austria	351	351	195	195	200	200	177	177	174	174	230	230	264	264	244	244	254	254	212	212	228	228	286	286	282	282	280	280	213	213	258	258	210	210	336	336	208	208	300	300	302	302
50	50_2	HOR9850	Hordeum vulgare L. convar. distichon (L.) Alef. var. nutans (Rode) Alef.	2	H		Austria	351	351	195	195	200	200	177	177	174	174	230	230	264	264	-99999	-99999	254	254	212	212	228	228	286	286	282	282	280	280	213	213	258	258	210	210	336	336	208	208	300	300	302	302
51	51_4	HOR9852	Hordeum vulgare L. convar. distichon (L.) Alef. var. nutans (Rode) Alef.	2	H		Austria	351	351	195	195	200	200	177	177	174	174	230	230	264	264	244	244	254	254	214	214	228	228	290	290	282	282	280	280	216	216	258	258	210	210	351	351	208	208	296	296	302	302
52	52_3	HOR9853	Hordeum vulgare L. convar. distichon (L.) Alef. var. nutans (Rode) Alef.	2	H		Austria	351	351	195	195	200	200	183	183	174	174	230	230	267	267	246	246	264	264	214	214	224	224	284	284	282	282	280	280	210	210	258	258	210	210	336	336	208	208	300	300	294	294
53	53_2	HOR9855	Hordeum vulgare L. convar. distichon (L.) Alef. var. nutans (Rode) Alef.	2	H		Austria	351	351	195	195	212	212	177	177	174	174	222	222	264	264	244	244	264	264	214	214	228	228	290	290	282	282	280	280	213	213	258	258	210	210	336	336	208	208	296	296	302	302
54	54_1	HOR9856	Hordeum vulgare L. convar. distichon (L.) Alef. var. nutans (Rode) Alef.	2	H		Austria	351	351	195	195	200	200	180	180	174	174	222	222	264	264	244	244	254	254	214	214	228	228	284	284	282	282	280	280	213	213	258	258	210	210	351	351	212	212	296	296	302	302
55	55_2	HOR9857	Hordeum vulgare L. convar. distichon (L.) Alef. var. nutans (Rode) Alef.	2	H		Austria	351	351	195	195	200	200	180	180	174	174	230	230	267	267	244	244	264	264	214	214	228	228	286	286	274	274	280	280	216	216	258	258	210	210	351	351	208	208	296	296	304	304
56	56_2	HOR14329	Hordeum vulgare L. convar. distichon (L.) Alef. var. erectum (Rode) Alef.	2	H		Austria	351	351	201	201	196	196	174	174	174	174	230	230	264	264	244	244	264	264	212	212	224	224	286	286	282	282	276	276	210	210	267	267	207	207	351	351	208	208	296	296	294	294
57	57_4	HOR182	Hordeum vulgare L. convar. distichon (L.) Alef. var. nutans (Rode) Alef.	2	H		Croatia	351	351	195	195	202	202	183	183	174	174	230	230	264	264	244	244	254	254	214	214	224	224	290	290	282	282	280	280	216	216	267	267	210	210	351	351	204	204	296	296	302	302
58	58_1	HOR4444	Hordeum vulgare L. convar. distichon (L.) Alef. var. medicum Körn.	2	H		Croatia	351	351	195	195	202	202	174	174	174	174	230	230	264	264	244	244	256	256	214	214	224	224	290	290	282	282	280	280	216	216	258	258	213	213	351	351	204	204	300	300	294	294
60	60_2	BCC1436	Hordeum vulgare L. convar. distichon (L.) Alef. var. nutans (Rode) Alef.	2	H		Czech	351	351	195	195	200	200	183	183	174	174	230	230	267	267	244	244	254	254	214	214	228	228	290	290	282	282	280	280	216	216	267	267	210	210	351	351	208	208	296	296	302	302
61	61_2	BCC1437	Hordeum vulgare L. convar. distichon (L.) Alef. var. nutans (Rode) Alef.	2	H		Czech	351	351	195	195	202	202	162	177	174	174	230	230	264	264	244	244	254	254	212	212	228	228	284	284	274	274	280	280	213	213	267	267	210	210	351	351	208	208	296	296	302	302
62	62_1	HOR7344	Hordeum vulgare L. convar. distichon (L.) Alef. var. nutans (Rode) Alef.	2	H		Czech	351	351	195	195	202	202	183	183	174	174	238	238	264	264	244	244	254	254	214	214	228	228	290	290	282	282	280	280	216	216	258	258	210	210	351	351	212	212	296	296	302	302
63	63_3	HOR7345	Hordeum vulgare L. convar. distichon (L.) Alef. var. nutans (Rode) Alef.	2	H		Czech	351	351	195	195	202	202	183	183	174	174	238	238	264	264	244	244	254	254	214	214	228	228	290	290	282	282	280	280	216	216	258	258	210	210	351	351	212	212	296	296	302	302
64	64_2	HOR7379	Hordeum vulgare L. convar. distichon (L.) Alef. var. nutans (Rode) Alef.	2	H		Czech	351	351	195	195	200	200	177	177	174	174	230	230	264	264	244	244	254	254	212	212	228	228	290	290	274	274	280	280	213	213	267	267	207	207	336	336	204	204	300	300	302	302
65	65_2	HOR7381	Hordeum vulgare L. convar. distichon (L.) Alef. var. nutans (Rode) Alef.	2	H		Czech	351	351	195	195	196	196	183	183	174	174	230	230	264	264	244	244	254	254	214	214	228	228	290	290	282	282	280	280	213	213	258	258	210	210	351	351	208	208	300	300	294	294
67	67_4	HOR7388	Hordeum vulgare L. convar. distichon (L.) Alef. var. nutans (Rode) Alef.	2	H		Czech	351	351	195	195	200	200	177	177	174	174	230	230	264	264	244	244	254	254	212	212	228	228	290	290	274	274	280	280	213	213	267	267	207	207	324	324	204	204	300	300	302	302
68	68_3	HOR8658	Hordeum vulgare L. convar. distichon (L.) Alef. var. nutans (Rode) Alef.	2	H		Egypt	351	351	201	201	206	210	174	174	174	174	202	202	264	264	246	246	262	262	214	214	228	228	286	286	274	274	280	280	216	216	276	276	210	210	351	351	208	208	296	296	302	302
69	69_3	HOR3539	Hordeum vulgare L. convar. distichon (L.) Alef. var. braunii Körn.	2	H		Ethiopia	351	351	192	192	200	200	177	177	174	174	230	230	264	264	244	244	266	266	214	214	224	224	286	286	276	276	280	280	216	216	267	267	210	210	339	345	200	200	296	296	302	302
70	70_3	HOR3604	Hordeum vulgare L. convar. distichon (L.) Alef. var. nutans (Rode) Alef.	2	H		Ethiopia	351	351	192	192	200	200	177	177	174	174	230	230	264	264	246	246	264	264	214	214	224	224	286	286	282	282	280	280	216	216	267	267	210	210	345	345	200	200	296	296	302	302
71	71_1	HOR4254	Hordeum vulgare L. convar. distichon (L.) Alef. var. braunii Körn.	2	H		Ethiopia	351	351	192	192	200	200	177	177	174	174	230	230	264	264	244	244	266	266	214	214	224	224	286	286	276	276	280	280	216	216	267	267	210	210	345	345	200	200	296	296	302	302
72	72_3	HOR5373	Hordeum vulgare L. convar. distichon (L.) Alef. var. medicum Körn.	2	H		Ethiopia	351	351	195	195	206	206	177	177	174	174	230	230	267	267	244	244	266	266	214	214	228	228	286	286	282	282	276	276	213	213	267	267	207	207	336	336	212	212	296	296	302	302
74	74_1	HOR5748	Hordeum vulgare L. convar. distichon (L.) Alef. var. heterolepis Körn.	2	H		Ethiopia	351	351	195	195	200	200	177	177	174	174	230	230	264	264	246	246	264	264	214	214	224	224	290	290	282	282	280	280	216	216	267	267	210	210	339	345	200	200	296	296	302	302
75	75_2	HOR5764	Hordeum vulgare L. convar. distichon (L.) Alef. var. hypianthinum Körn.	2	H		Ethiopia	351	351	192	192	200	200	177	177	174	174	230	230	264	264	246	246	264	264	214	214	224	224	286	286	282	282	280	280	216	216	267	267	210	210	336	336	200	200	296	296	302	302
76	76_3	HOR5811	Hordeum vulgare L. convar. distichon (L.) Alef. var. medicum Körn.	2	H		Ethiopia	351	351	195	195	200	200	183	183	174	174	230	230	264	264	244	244	254	254	214	214	224	224	284	284	282	282	276	276	216	216	267	267	210	210	351	351	208	208	296	296	294	294
77	77_1	HOR5914	Hordeum vulgare L. convar. distichon (L.) Alef. var. medicum Körn.	2	H		Ethiopia	351	351	195	195	202	202	174	174	174	174	230	230	264	264	246	246	264	264	212	212	224	224	286	286	274	274	274	274	210	210	270	270	207	207	351	351	208	208	296	296	294	294
78	78_2	HOR5926	Hordeum vulgare L. convar. distichon (L.) Alef. var. inerme Körn.	2	H		Ethiopia	351	351	-99999	-99999	200	200	174	174	174	174	230	230	264	264	246	246	256	256	214	214	224	224	290	290	276	276	-99999	-99999	216	216	267	267	210	210	336	336	200	200	-99999	-99999	302	302
79	79_1	HOR6202	Hordeum vulgare L. convar. distichon (L.) Alef. var. erectum (Rode) Alef.	2	H		Ethiopia	261	261	195	195	202	202	174	174	174	174	250	250	264	264	244	244	264	264	212	212	228	228	290	290	274	274	274	274	210	210	267	267	210	210	351	351	212	212	300	300	294	294
80	80_1	HOR6802	Hordeum vulgare L. convar. distichon (L.) Alef. var. inerme Körn.	2	H		Ethiopia	351	351	195	195	200	208	177	177	174	174	230	230	264	264	246	246	254	254	214	214	228	228	286	286	282	282	280	280	216	216	267	267	207	207	336	336	200	208	296	296	302	302
81	81_3	HOR6928	Hordeum vulgare L. convar. distichon (L.) Alef. var. inerme Körn.	2	H		Ethiopia	351	351	195	195	200	208	177	177	174	174	230	230	264	264	246	246	254	254	214	214	224	224	290	290	282	282	280	280	213	213	267	267	210	210	336	336	208	208	296	296	302	302
82	82_1	HOR7928	Hordeum vulgare L. convar. distichon (L.) Alef. var. nutans (Rode) Alef.	2	H		Ethiopia	351	351	192	192	200	200	177	177	174	174	230	230	264	264	246	246	264	264	214	214	228	228	290	290	282	282	280	280	216	216	267	267	210	210	336	336	200	200	296	296	302	302
84	84_1	HOR7939	Hordeum vulgare L. convar. distichon (L.) Alef. var. nutans (Rode) Alef.	2	H		Ethiopia	351	351	192	192	200	200	177	177	174	174	230	230	264	264	246	246	264	264	214	214	224	224	286	286	282	282	280	280	216	216	267	267	210	210	339	345	208	208	296	296	302	302
85	85_2	HOR7941	Hordeum vulgare L. convar. distichon (L.) Alef. var. nutans (Rode) Alef.	2	H		Ethiopia	351	351	192	192	200	200	177	177	174	174	230	230	264	264	246	246	264	264	214	214	224	224	286	286	282	282	280	280	216	216	267	267	210	210	345	345	208	208	296	296	302	302
86	86_1	HOR7946	Hordeum vulgare L. convar. distichon (L.) Alef. var. nutans (Rode) Alef.	2	H		Ethiopia	351	351	192	192	200	200	177	177	174	174	230	230	264	264	246	246	264	264	214	214	224	224	286	286	282	282	280	280	216	216	267	267	210	210	339	345	208	208	296	296	302	302
87	87_2	HOR7947	Hordeum vulgare L. convar. distichon (L.) Alef. var. nutans (Rode) Alef.	2	H		Ethiopia	351	351	192	192	200	200	177	177	174	174	230	230	264	264	246	246	264	264	214	214	224	224	286	286	282	282	280	280	216	216	267	267	210	210	339	345	208	208	296	296	302	302
88	88_1	HOR7955	Hordeum vulgare L. convar. distichon (L.) Alef. var. nutans (Rode) Alef.	2	H		Ethiopia	351	351	192	192	200	200	177	177	174	174	230	230	264	264	246	246	264	264	214	214	224	224	286	286	282	282	280	280	216	216	267	267	204	204	336	336	200	200	296	296	302	302
89	89_1	HOR7956	Hordeum vulgare L. convar. distichon (L.) Alef. var. erectum (Rode) Alef.	2	H		Ethiopia	351	351	201	201	196	196	177	177	174	174	230	230	264	264	244	244	-99999	-99999	212	212	224	224	286	286	274	274	276	276	210	210	267	267	207	207	336	336	208	208	296	296	-99999	-99999
90	90_2	HOR7958	Hordeum vulgare L. convar. distichon (L.) Alef. var. nutans (Rode) Alef.	2	H		Ethiopia	351	351	192	192	200	200	177	177	174	174	230	230	264	264	246	246	264	264	214	214	224	224	286	286	282	282	280	280	216	216	267	267	210	210	-99999	-99999	200	200	296	296	302	302
91	91_3	HOR10258	Hordeum vulgare L. convar. distichon (L.) Alef. var. erectum (Rode) Alef.	2	H		Ethiopia	351	351	201	201	196	196	177	177	174	174	230	230	264	264	244	244	254	254	212	212	224	224	286	286	282	282	276	276	210	210	267	267	207	207	336	336	208	208	296	296	302	302
92	92_2	HOR10259	Hordeum vulgare L. convar. distichon (L.) Alef. var. nutans (Rode) Alef.	2	H		Ethiopia	351	351	201	201	202	202	183	183	174	174	230	230	264	264	244	244	254	254	214	214	228	228	290	290	274	274	280	280	216	216	258	258	210	210	351	351	208	208	296	296	304	304
93	93_1	HOR10325	Hordeum vulgare L. convar. distichon (L.) Alef. var. nutans (Rode) Alef.	2	H		Ethiopia	351	351	192	192	200	200	-99999	-99999	174	174	230	230	264	264	244	244	266	266	214	214	224	224	290	290	276	276	280	280	216	216	-99999	-99999	204	204	345	345	200	200	296	296	302	302
94	94_1	HOR10426	Hordeum vulgare L. convar. distichon (L.) Alef. var. nigricans Sér.	2	H		Ethiopia	351	351	192	192	202	202	-99999	-99999	174	174	230	230	264	264	244	244	264	264	214	214	224	224	290	290	282	282	280	280	216	216	-99999	-99999	210	210	336	336	200	200	296	296	302	302
95	95_1	HOR10434	Hordeum vulgare L. convar. distichon (L.) Alef. var. nutans (Rode) Alef.	2	H		Ethiopia	351	351	192	192	200	200	177	177	174	174	230	230	264	264	246	246	264	264	214	214	224	224	290	290	282	282	280	280	219	219	267	267	204	204	345	345	200	200	296	296	302	302
96	96_1	HOR10435	Hordeum vulgare L. convar. distichon (L.) Alef. var. nigricans Sér.	2	H		Ethiopia	351	351	192	192	200	200	177	177	174	174	230	230	264	264	246	246	264	264	214	214	224	224	290	290	282	282	280	280	216	216	267	267	210	210	339	345	200	200	296	296	302	302
97	97_1	HOR10438	Hordeum vulgare L. convar. distichon (L.) Alef. var. nutans (Rode) Alef.	2	H		Ethiopia	351	351	192	192	200	200	177	177	174	174	218	230	264	264	246	246	264	264	214	214	224	224	290	290	282	282	280	280	207	207	267	267	204	204	336	336	200	200	296	296	302	302
98	98_4	HOR10443	Hordeum vulgare L. convar. distichon (L.) Alef. var. nutans (Rode) Alef.	2	H		Ethiopia	351	351	192	192	200	200	177	177	174	174	230	230	264	264	246	246	264	264	214	214	224	224	290	290	282	282	280	280	216	216	267	267	210	210	336	336	200	200	296	296	302	302
99	99_4	HOR10444	Hordeum vulgare L. convar. distichon (L.) Alef. var. nutans (Rode) Alef.	2	H		Ethiopia	351	351	192	192	200	200	177	177	174	174	230	230	264	264	244	244	266	266	214	214	224	224	290	290	276	276	280	280	216	216	267	267	204	204	345	345	200	200	296	296	302	302
100	100_3	HOR10446	Hordeum vulgare L. convar. distichon (L.) Alef. var. nutans (Rode) Alef.	2	H		Ethiopia	351	351	192	192	200	200	177	177	174	174	230	230	264	264	244	244	266	266	214	214	224	224	290	290	276	276	280	280	216	216	267	267	204	204	345	345	200	200	296	296	302	302
101	101_3	HOR10447	Hordeum vulgare L. convar. distichon (L.) Alef. var. nutans (Rode) Alef.	2	H		Ethiopia	351	351	192	192	200	200	177	177	174	174	230	230	264	264	244	244	266	266	214	214	224	224	290	290	276	276	280	280	216	216	267	267	204	204	339	345	200	200	296	296	302	302
102	102_1	HOR10501	Hordeum vulgare L. convar. distichon (L.) Alef. var. nutans (Rode) Alef.	2	H		Ethiopia	351	351	192	192	200	200	174	174	174	174	230	230	264	264	246	246	266	266	214	214	224	224	290	290	276	276	280	280	216	216	267	267	210	210	345	345	200	200	296	296	302	302
103	103_3	HOR10502	Hordeum vulgare L. convar. distichon (L.) Alef. var. nutans (Rode) Alef.	2	H		Ethiopia	351	351	192	192	200	200	-99999	-99999	174	174	222	222	-99999	-99999	234	234	254	266	214	214	224	224	290	290	276	276	280	280	216	216	-99999	-99999	204	204	-99999	-99999	200	200	296	296	302	302
104	104_1	HOR10761	Hordeum vulgare L. convar. distichon (L.) Alef.	2	H		Ethiopia	351	351	192	192	200	200	177	177	174	174	230	230	264	264	244	244	264	264	214	214	224	224	286	286	282	282	280	280	216	216	267	267	210	210	345	345	200	200	296	296	302	302
105	105_3	HOR131	Hordeum vulgare L. convar. distichon (L.) Alef. var. nutans (Rode) Alef.	2	H		Finnland	351	351	195	195	202	202	180	180	174	174	222	222	264	264	244	244	254	254	214	214	228	228	284	284	282	282	280	280	213	213	258	258	210	210	336	336	208	208	296	296	304	304
106	106_1	HOR9901	Hordeum vulgare L. convar. distichon (L.) Alef. var. nutans (Rode) Alef.	2	H		Finnland	351	351	195	195	200	200	168	177	174	174	230	230	264	264	244	244	274	274	212	212	228	228	286	286	282	282	280	280	216	216	258	258	207	207	336	336	208	208	296	296	302	302
107	107_2	HOR14094	Hordeum vulgare L. convar. distichon (L.) Alef. var. nutans (Rode) Alef.	2	H		Finnland	351	351	195	195	210	210	180	180	174	174	230	230	264	264	246	246	264	264	214	214	228	228	286	286	282	282	280	280	216	216	258	258	210	210	351	351	208	208	296	296	302	302
108	108_1	HOR9919	Hordeum vulgare L. convar. distichon (L.) Alef. var. nutans (Rode) Alef.	2	H		France	351	351	195	195	202	202	168	177	174	174	230	230	264	264	244	244	254	254	214	214	228	228	290	290	282	282	280	280	216	216	258	258	207	207	351	351	208	208	300	300	302	302
109	109_4	HOR12811	Hordeum vulgare L. convar. distichon (L.) Alef. var. nutans (Rode) Alef.	2	H		France	351	351	195	195	210	210	174	174	174	174	230	230	264	264	244	244	254	254	212	212	228	228	288	288	282	282	280	280	213	213	258	258	210	210	351	351	212	212	300	300	302	302
110	110_3	HOR4725	Hordeum vulgare L. convar. distichon (L.) Alef. var. nutans (Rode) Alef.	2	H		Georgia	351	351	195	195	202	202	174	174	-99999	-99999	202	202	267	267	246	246	264	264	214	214	228	228	286	286	282	282	280	280	213	213	258	258	210	210	336	336	208	208	296	296	302	302
111	111_3	HOR4726	Hordeum vulgare L. convar. distichon (L.) Alef. var. nutans (Rode) Alef.	2	H		Georgia	351	351	210	210	218	218	168	168	162	162	206	206	264	264	244	244	254	254	214	214	224	224	284	284	274	274	280	280	213	213	264	264	210	210	351	351	204	204	296	296	304	304
112	112_2	HOR8480	Hordeum vulgare L. convar. distichon (L.) Alef. var. nutans (Rode) Alef.	2	H		Georgia	351	351	201	201	212	212	174	174	174	174	230	230	267	267	244	244	254	254	214	214	224	224	290	290	274	274	280	280	213	213	264	264	210	210	336	336	208	208	296	296	294	294
113	113_3	HOR9607	Hordeum vulgare L. convar. distichon (L.) Alef. var. medicum Körn.	2	H		Georgia	351	351	195	195	206	206	174	174	174	174	234	234	267	267	246	246	254	254	214	214	224	224	290	290	282	282	276	276	213	213	267	267	207	207	336	336	212	212	286	286	302	302
114	114_1	HOR9610	Hordeum vulgare L. convar. distichon (L.) Alef. var. nutans (Rode) Alef.	2	H		Georgia	351	351	210	210	216	216	168	177	174	174	230	230	264	264	244	244	256	256	214	214	224	224	284	284	274	274	280	280	213	213	264	264	210	210	351	351	208	208	296	296	304	304
115	115_3	HOR9612	Hordeum vulgare L. convar. distichon (L.) Alef. var. nutans (Rode) Alef.	2	H		Georgia	351	351	210	210	218	218	177	177	174	174	202	202	264	264	244	244	268	268	214	214	224	224	284	284	274	274	280	280	213	213	264	264	210	210	351	351	204	204	296	296	304	304
116	116_2	HOR9613	Hordeum vulgare L. convar. distichon (L.) Alef. var. nutans (Rode) Alef.	2	H		Georgia	351	351	210	210	218	218	177	177	174	174	234	234	267	267	-99999	-99999	256	256	214	214	224	224	284	284	274	274	280	280	213	213	264	264	210	210	351	351	208	208	296	296	304	304
117	117_4	HOR9616	Hordeum vulgare L. convar. distichon (L.) Alef. var. nutans (Rode) Alef.	2	H		Georgia	351	351	204	204	220	220	-99999	-99999	174	174	218	218	267	267	244	244	256	256	214	214	224	224	284	284	274	274	280	280	213	213	264	264	207	207	351	351	204	204	296	296	302	302
118	118_3	HOR9617	Hordeum vulgare L. convar. distichon (L.) Alef. var. nutans (Rode) Alef.	2	H		Georgia	351	351	210	210	220	220	177	177	174	174	218	218	267	267	244	244	256	256	214	214	224	224	284	284	274	274	276	276	213	213	273	273	210	210	351	351	204	204	296	296	304	304
119	119_2	HOR9618	Hordeum vulgare L. convar. distichon (L.) Alef. var. hypianthinum Körn.	2	H		Georgia	351	351	210	210	218	218	177	177	174	174	254	254	267	267	244	244	264	264	214	214	224	224	284	284	282	282	280	280	213	213	264	264	210	210	351	351	208	208	295	295	302	302
120	120_2	HOR9619	Hordeum vulgare L. convar. distichon (L.) Alef. var. nutans (Rode) Alef.	2	H		Georgia	351	351	210	210	212	212	177	177	174	174	218	218	267	267	244	244	264	264	214	214	224	224	292	292	282	282	276	276	213	213	264	264	210	210	351	351	200	200	296	296	302	302
121	121_1	HOR9626	Hordeum vulgare L. convar. distichon (L.) Alef. var. medicum Körn.	2	H		Georgia	351	351	195	195	206	206	174	174	174	174	234	234	267	267	246	246	254	254	214	214	224	224	288	288	274	274	276	276	213	213	267	267	207	207	336	336	212	212	286	286	302	302
122	122_2	HOR9630	Hordeum vulgare L. convar. distichon (L.) Alef. var. medicum Körn.	2	H		Georgia	351	351	195	195	212	212	183	183	174	174	230	230	267	267	246	246	254	254	214	214	228	228	284	284	274	274	278	278	213	213	258	258	210	210	351	351	204	204	296	296	294	294
123	123_4	HOR9816	Hordeum vulgare L. convar. distichon (L.) Alef. var. nutans (Rode) Alef.	2	H		Georgia	351	351	195	195	200	200	177	177	174	174	226	226	264	264	244	244	254	254	212	212	228	228	286	286	282	282	280	280	213	213	258	258	210	210	351	351	204	204	296	296	302	302
124	124_3	HOR9869	Hordeum vulgare L. convar. distichon (L.) Alef. var. nutans (Rode) Alef.	2	H		Georgia	351	351	210	210	220	220	177	177	174	174	262	262	264	264	244	244	254	254	214	214	224	224	290	290	282	282	280	280	213	213	264	264	210	210	351	351	204	204	296	296	302	302
125	125_1	HOR9870	Hordeum vulgare L. convar. distichon (L.) Alef. var. nutans (Rode) Alef.	2	H		Georgia	351	351	210	210	218	218	174	174	174	174	254	254	267	267	244	244	256	256	214	214	224	224	284	284	286	286	276	276	213	213	264	264	210	210	351	351	208	208	296	296	302	302
126	126_4	HOR9871	Hordeum vulgare L. convar. distichon (L.) Alef. var. nutans (Rode) Alef.	2	H		Georgia	351	351	210	210	220	220	177	177	174	174	230	230	264	264	244	244	256	256	-99999	-99999	224	224	284	284	274	274	280	280	213	213	264	264	210	210	345	345	204	204	295	295	304	304
127	127_4	HOR10357	Hordeum vulgare L. convar. distichon (L.) Alef. var. nutans (Rode) Alef.	2	H		Georgia	351	351	210	210	218	218	177	177	174	174	230	230	267	267	244	244	264	264	214	214	224	224	284	284	-99999	-99999	280	280	213	213	264	264	210	210	351	351	208	208	296	296	302	302
128	128_1	HOR10463	Hordeum vulgare L. convar. distichon (L.) Alef. var. nutans (Rode) Alef.	2	H		Georgia	351	351	210	210	218	218	177	177	174	174	266	266	264	264	244	244	256	256	214	214	224	224	284	284	284	284	276	276	213	213	264	264	210	210	351	351	204	204	296	296	304	304
129	129_4	HOR10464	Hordeum vulgare L. convar. distichon (L.) Alef. var. hypianthinum Körn.	2	H		Georgia	351	351	210	210	218	218	165	174	174	174	262	262	267	267	244	244	254	254	214	214	224	224	284	284	286	286	280	280	213	213	264	264	210	210	351	351	208	208	296	296	302	302
130	130_4	HOR10465	Hordeum vulgare L. convar. distichon (L.) Alef. var. nutans (Rode) Alef.	2	H		Georgia	351	351	210	210	218	218	174	174	174	174	262	262	267	267	244	244	256	256	214	214	224	224	284	284	286	286	276	276	213	213	264	264	210	210	351	351	204	204	296	296	302	302
131	131_1	HOR10466	Hordeum vulgare L. convar. distichon (L.) Alef. var. nutans (Rode) Alef.	2	H		Georgia	351	351	210	210	218	218	174	174	174	174	202	202	267	267	244	244	256	256	214	214	224	224	284	284	282	282	280	280	213	213	264	264	210	210	351	351	208	208	296	296	302	302
132	132_1	HOR10640	Hordeum vulgare L. convar. distichon (L.) Alef. var. nutans (Rode) Alef.	2	H		Georgia	351	351	210	210	224	224	177	177	174	174	202	202	264	264	244	244	264	264	214	214	224	224	290	290	284	284	276	276	213	213	264	264	210	210	351	351	208	208	296	296	302	302
133	133_1	HOR10641	Hordeum vulgare L. convar. distichon (L.) Alef. var. nutans (Rode) Alef.	2	H		Georgia	351	351	210	210	212	212	177	177	174	174	218	218	267	267	244	244	254	254	214	214	228	228	284	284	284	284	280	280	213	213	264	264	210	210	351	351	208	208	296	296	302	302
134	134_1	HOR10645	Hordeum vulgare L. convar. distichon (L.) Alef. var. nutans (Rode) Alef.	2	H		Georgia	351	351	210	210	212	212	177	177	174	174	230	230	267	267	244	244	264	264	212	212	224	224	290	290	284	284	276	276	213	213	264	264	210	210	351	351	204	204	296	296	302	302
135	135_1	HOR10649	Hordeum vulgare L. convar. distichon (L.) Alef. var. nutans (Rode) Alef.	2	H		Georgia	351	351	210	210	212	212	177	177	174	174	262	262	267	267	244	244	264	264	214	214	224	224	284	284	284	284	280	280	213	213	264	264	210	210	336	336	204	204	296	296	302	302
136	136_1	HOR10741	Hordeum vulgare L. convar. distichon (L.) Alef. var. nutans (Rode) Alef.	2	H		Georgia	351	351	210	210	212	212	174	174	174	174	202	202	267	267	244	244	262	262	214	214	224	224	290	290	284	284	276	276	213	213	264	264	207	207	351	351	208	208	296	296	302	302
137	137_3	HOR10749	Hordeum vulgare L. convar. distichon (L.) Alef. var. nutans (Rode) Alef.	2	H		Georgia	351	351	195	195	202	202	180	180	174	174	218	218	264	264	244	244	254	254	214	214	228	228	290	290	282	282	280	280	216	216	258	258	210	210	336	336	208	208	300	300	302	302
138	138_1	HOR10774	Hordeum vulgare L. convar. distichon (L.) Alef. var. nutans (Rode) Alef.	2	H		Georgia	351	351	210	210	212	212	-99999	-99999	174	174	202	202	267	267	244	244	264	264	214	214	224	224	284	284	284	284	276	276	213	213	-99999	-99999	210	210	351	351	208	208	296	296	302	302
139	139_4	HOR10775	Hordeum vulgare L. convar. distichon (L.) Alef. var. nutans (Rode) Alef.	2	H		Georgia	351	351	210	210	212	212	171	171	174	174	262	262	264	264	244	244	264	264	214	214	224	224	290	290	274	274	276	276	213	213	264	264	207	207	351	351	208	208	296	296	302	302
140	140_2	HOR10890	Hordeum vulgare L. convar. distichon (L.) Alef. var. nutans (Rode) Alef.	2	H		Georgia	351	351	195	195	200	200	174	174	171	171	262	262	267	267	244	244	264	264	214	214	228	228	286	286	282	282	278	278	213	213	258	258	210	210	351	351	208	208	296	296	302	302
141	141_2	HOR10971	Hordeum vulgare L. convar. distichon (L.) Alef. var. nutans (Rode) Alef.	2	H		Georgia	351	351	195	195	202	202	174	174	174	174	222	222	264	264	244	244	254	254	214	214	228	228	286	286	282	282	280	280	216	216	258	258	210	210	351	351	204	204	296	296	304	304
142	142_2	HOR10972	Hordeum vulgare L. convar. distichon (L.) Alef. var. nutans (Rode) Alef.	2	H		Georgia	351	351	201	201	212	212	174	174	174	174	230	230	267	267	244	244	254	254	214	214	224	224	290	290	274	274	280	280	213	213	258	258	210	210	351	351	204	204	296	296	294	294
143	143_2	HOR10973	Hordeum vulgare L. convar. distichon (L.) Alef. var. nutans (Rode) Alef.	2	H		Georgia	351	351	201	201	212	212	174	174	174	174	230	230	264	264	-99999	-99999	254	254	214	214	224	224	290	290	274	274	280	280	213	213	258	258	210	210	345	345	-99999	-99999	295	295	294	294
144	144_1	HOR10989	Hordeum vulgare L. convar. distichon (L.) Alef. var. nutans (Rode) Alef.	2	H		Georgia	351	351	210	210	212	212	174	174	174	174	230	230	267	267	244	244	264	264	214	214	224	224	290	290	274	274	276	276	216	216	267	267	210	210	351	351	204	204	296	296	304	304
145	145_2	HOR11320	Hordeum vulgare L. convar. distichon (L.) Alef. var. nutans (Rode) Alef.	2	H		Georgia	351	351	210	210	212	212	177	177	174	174	222	222	267	267	244	244	264	264	214	214	224	224	290	290	274	274	278	278	213	213	264	264	210	210	351	351	208	208	296	296	302	302
146	146_3	HOR336	Hordeum vulgare L. convar. distichon (L.) Alef. var. freislebenii Mansf.	2	H		Germany	351	351	201	201	212	212	162	162	174	174	238	238	264	264	244	244	254	254	214	214	224	224	290	290	274	274	280	280	213	213	-99999	-99999	210	210	351	351	208	208	296	296	304	304
147	147_2	HOR354	Hordeum vulgare L. convar. distichon (L.) Alef. var. nutans (Rode) Alef.	2	H		Germany	351	351	195	195	200	200	180	180	174	174	222	222	264	264	244	244	254	254	214	214	228	228	284	284	282	282	280	280	213	213	258	258	210	210	351	351	212	212	296	296	302	302
148	148_3	HOR1422	Hordeum vulgare L. convar. distichon (L.) Alef. var. nutans (Rode) Alef.	2	H		Germany	351	351	201	201	202	202	174	174	174	174	230	230	264	264	244	244	266	266	212	212	224	224	286	286	274	274	274	274	216	216	267	267	207	207	351	351	216	216	288	288	294	294
149	149_2	HOR1423	Hordeum vulgare L. convar. distichon (L.) Alef. var. nutans (Rode) Alef.	2	H		Germany	351	351	195	195	202	202	177	177	174	174	230	230	264	264	244	244	256	256	214	214	224	224	290	290	282	282	280	280	216	216	266	266	210	210	351	351	204	204	296	296	304	304
150	150_1	BCC1443	Hordeum vulgare L. convar. distichon (L.) Alef. var. nutans (Rode) Alef.	2	H		Germany	351	351	195	195	202	202	171	171	174	174	238	238	264	264	244	244	254	254	214	214	228	228	286	286	282	282	280	280	216	216	258	258	210	210	351	351	204	204	296	296	304	304
151	151_3	HOR1903	Hordeum vulgare L. convar. distichon (L.) Alef. var. nutans (Rode) Alef.	2	H		Germany	351	351	195	195	200	200	177	177	174	174	230	230	267	267	246	246	264	264	214	214	228	228	284	284	282	282	280	280	213	213	258	258	210	210	336	336	208	208	296	296	302	302
152	152_2	HOR2072	Hordeum vulgare L. convar. distichon (L.) Alef. var. nutans (Rode) Alef.	2	H		Germany	351	351	195	195	202	202	177	177	174	174	222	222	264	264	244	244	254	254	214	214	228	228	284	284	282	282	280	280	213	213	267	267	210	210	351	351	208	208	300	300	294	294
153	153_3	HOR2195	Hordeum vulgare L. convar. distichon (L.) Alef. var. nutans (Rode) Alef.	2	H		Germany	351	351	201	201	196	196	165	177	174	174	230	230	264	264	-99999	-99999	256	256	212	212	224	224	286	286	274	274	274	274	216	216	267	267	207	207	351	351	216	216	296	296	294	294
154	154_4	HOR2202	Hordeum vulgare L. convar. distichon (L.) Alef. var. nutans (Rode) Alef.	2	H		Germany	351	351	195	195	200	200	-99999	-99999	174	174	222	222	264	264	244	244	254	254	214	214	228	228	284	284	282	282	280	280	210	210	-99999	-99999	210	210	336	336	204	204	300	300	302	302
155	155_1	HOR2211	Hordeum vulgare L. convar. distichon (L.) Alef. var. nutans (Rode) Alef.	2	H		Germany	351	351	195	195	200	200	165	165	174	174	230	230	264	264	246	246	254	254	214	214	228	228	286	286	282	282	280	280	216	216	258	258	210	210	336	336	208	208	296	296	304	304
156	156_4	HOR2212	Hordeum vulgare L. convar. distichon (L.) Alef. var. nutans (Rode) Alef.	2	H		Germany	351	351	195	195	200	200	177	177	174	174	222	222	264	264	244	244	254	254	214	214	228	228	290	290	282	282	280	280	213	213	267	267	210	210	351	351	204	204	296	296	294	294
157	157_4	HOR2962	Hordeum vulgare L. convar. distichon (L.) Alef. var. nutans (Rode) Alef.	2	H		Germany	351	351	201	201	196	196	177	177	174	174	230	230	264	264	244	244	256	256	212	212	224	224	286	286	274	274	274	274	216	216	267	267	207	207	351	351	216	216	296	296	294	294
158	158_2	HOR3757	Hordeum vulgare L. convar. distichon (L.) Alef. var. nutans (Rode) Alef.	2	H		Germany	351	351	195	195	200	200	171	180	174	174	222	222	264	264	244	244	254	254	214	214	228	228	284	284	282	282	280	280	213	213	258	258	210	210	351	351	212	212	296	296	302	302
159	159_2	HOR3758	Hordeum vulgare L. convar. distichon (L.) Alef. var. nutans (Rode) Alef.	2	H		Germany	351	351	201	201	196	196	177	177	174	174	230	230	264	264	244	244	256	256	212	212	224	224	286	286	274	274	274	274	216	216	267	267	207	207	351	351	216	216	296	296	294	294
160	160_1	HOR11519	Hordeum vulgare L. convar. distichon (L.) Alef. var. nutans (Rode) Alef.	2	H		Germany	351	351	195	195	200	200	177	177	174	174	230	230	264	264	246	246	264	264	214	214	228	228	284	284	282	282	280	280	213	213	258	258	210	210	336	336	208	208	300	300	302	302
161	161_2	HOR12417	Hordeum vulgare L. convar. distichon (L.) Alef. var. nutans (Rode) Alef.	2	H		Germany	351	351	195	195	200	200	159	159	174	174	230	230	264	264	246	246	254	254	214	214	228	228	286	286	282	282	280	280	216	216	258	258	210	210	351	351	204	204	296	296	304	304
162	162_1	HOR14025	Hordeum vulgare L. convar. distichon (L.) Alef. var. erectum (Rode) Alef.	2	H		Germany	351	351	201	201	196	196	177	177	174	174	230	230	264	264	244	244	256	256	212	212	224	224	284	284	274	274	276	276	210	210	267	267	207	207	351	351	216	216	296	296	294	294
163	163_4	HOR14037	Hordeum vulgare L. convar. distichon (L.) Alef. var. nutans (Rode) Alef.	2	H		Germany	351	351	195	195	200	208	177	177	174	174	230	230	264	264	244	244	254	254	214	214	224	224	284	284	282	282	280	280	216	216	258	258	210	210	336	336	208	208	300	300	302	302
164	164_1	HOR14040	Hordeum vulgare L. convar. distichon (L.) Alef. var. nutans (Rode) Alef.	2	H		Germany	351	351	195	195	200	200	174	174	174	174	230	230	264	264	244	244	254	254	214	214	228	228	290	290	282	282	280	280	216	216	258	258	210	210	351	351	204	204	296	296	302	302
165	165_2	HOR14064	Hordeum vulgare L. convar. distichon (L.) Alef. var. nutans (Rode) Alef.	2	H		Germany	351	351	195	195	202	202	183	183	174	174	230	230	264	264	244	244	254	254	214	214	224	224	290	290	282	282	280	280	216	216	267	267	210	210	336	351	204	204	296	296	302	302
166	166_2	HOR14363	Hordeum vulgare L. convar. distichon (L.) Alef. var. nutans (Rode) Alef.	2	H		Germany	351	351	201	201	210	210	174	174	174	174	230	230	264	264	244	244	254	254	214	214	228	228	286	286	282	282	276	276	216	216	267	267	207	207	336	336	208	208	300	300	294	294
167	167_3	HOR14364	Hordeum vulgare L. convar. distichon (L.) Alef. var. nutans (Rode) Alef.	2	H		Germany	351	351	201	201	210	210	174	174	174	174	230	230	264	264	244	244	254	254	214	214	228	228	286	286	282	282	276	276	216	216	267	267	207	207	336	336	208	208	300	300	294	294
168	168_4	HOR14374	Hordeum vulgare L. convar. distichon (L.) Alef. var. nutans (Rode) Alef.	2	H		Germany	351	351	195	195	200	200	159	159	-99999	-99999	226	226	267	267	246	246	254	254	214	214	224	224	284	284	282	282	280	280	213	213	258	258	210	210	336	336	208	208	300	300	304	304
169	169_4	HOR15961	Hordeum vulgare L. convar. distichon (L.) Alef. var. nutans (Rode) Alef.	2	H		Germany	351	351	195	195	200	200	177	177	174	174	222	222	264	264	246	246	254	254	214	214	228	228	290	290	282	282	280	280	213	213	258	258	210	210	351	351	216	216	300	300	302	302
170	170_2	HOR673	Hordeum vulgare L. convar. distichon (L.) Alef. var. nutans (Rode) Alef.	2	H		Greece	351	351	201	201	202	208	177	177	165	165	230	230	264	264	244	244	256	256	212	212	224	224	286	286	274	274	276	276	216	216	267	267	207	207	336	336	208	208	300	300	294	294
171	171_2	HOR725	Hordeum vulgare L. convar. distichon (L.) Alef. var. nutans (Rode) Alef.	2	H		Greece	351	351	195	195	202	202	183	183	174	174	230	230	264	264	244	244	256	256	212	212	224	224	290	290	274	274	276	276	213	213	270	270	207	207	336	336	204	204	296	296	302	302
172	172_2	HOR753	Hordeum vulgare L. convar. distichon (L.) Alef. var. nutans (Rode) Alef.	2	H		Greece	351	351	195	195	202	202	183	183	174	174	230	230	264	264	244	244	254	254	214	214	224	224	286	286	274	274	280	280	213	213	255	255	207	207	351	351	204	204	296	296	302	302
173	174_2	HOR869	Hordeum vulgare L. convar. distichon (L.) Alef. var. nutans (Rode) Alef.	2	H		Greece	351	351	195	195	202	202	174	174	174	174	230	230	264	264	246	246	256	256	212	212	224	224	286	286	274	274	276	276	213	213	270	270	210	210	351	351	208	208	296	296	304	304
174	174_2	HOR876	Hordeum vulgare L. convar. distichon (L.) Alef. var. medicum Körn.	2	H		Greece	351	351	195	195	200	200	180	180	174	174	266	266	264	264	246	246	254	254	214	214	228	228	286	286	282	282	278	278	216	216	270	270	207	207	336	336	208	208	296	296	294	294
176	176_1	HOR882	Hordeum vulgare L. convar. distichon (L.) Alef. var. nutans (Rode) Alef.	2	H		Greece	351	351	195	195	202	202	183	183	174	174	230	230	264	264	244	244	254	254	212	212	224	224	290	290	274	274	276	276	213	213	270	270	207	207	351	351	204	204	296	296	302	302
177	177_3	HOR883	Hordeum vulgare L. convar. distichon (L.) Alef. var. nutans (Rode) Alef.	2	H		Greece	351	351	195	195	202	202	183	183	174	174	230	230	264	264	244	244	256	256	212	212	224	224	290	290	282	282	280	280	213	213	258	258	207	207	336	351	204	204	296	296	302	302
178	178_2	HOR937	Hordeum vulgare L. convar. distichon (L.) Alef. var. nutans (Rode) Alef.	2	H		Greece	351	351	195	195	202	202	165	177	174	174	230	230	264	264	246	246	264	264	214	214	228	228	286	286	282	282	280	280	213	213	267	267	210	210	351	351	208	208	296	296	302	302
179	179_1	HOR941	Hordeum vulgare L. convar. distichon (L.) Alef. var. nutans (Rode) Alef.	2	H		Greece	351	351	195	195	202	202	183	183	174	174	230	230	264	264	244	244	256	256	212	212	224	224	290	290	274	274	276	276	213	213	270	270	207	207	336	336	204	204	296	296	302	302
180	180_1	HOR943	Hordeum vulgare L. convar. distichon (L.) Alef. var. nutans (Rode) Alef.	2	H		Greece	351	351	195	195	212	212	180	180	174	174	230	230	267	267	246	246	254	254	212	212	228	228	290	290	274	274	280	280	216	216	267	267	210	210	336	336	204	204	296	296	302	302
181	181_1	HOR1122	Hordeum vulgare L. convar. distichon (L.) Alef. var. medicum Körn.	2	H		Greece	336	336	195	195	200	200	180	180	174	174	262	262	264	264	246	246	254	254	214	214	228	228	286	286	282	282	278	278	216	216	270	270	207	207	336	336	208	208	296	296	294	294
182	182_2	HOR1127	Hordeum vulgare L. convar. distichon (L.) Alef. var. nutans (Rode) Alef.	2	H		Greece	351	351	195	195	200	200	177	177	171	171	230	230	264	264	246	246	256	256	214	214	228	228	284	284	274	274	280	280	213	213	258	258	210	210	336	336	208	208	296	296	302	302
183	183_2	HOR1268	Hordeum vulgare L. convar. distichon (L.) Alef. var. nutans (Rode) Alef.	2	H		Greece	351	351	195	195	202	202	183	183	174	174	230	230	264	264	244	244	256	256	212	212	224	224	290	290	274	274	276	276	213	213	270	270	207	207	351	351	204	204	296	296	302	302
184	184_1	HOR1283	Hordeum vulgare L. convar. distichon (L.) Alef. var. nutans (Rode) Alef.	2	H		Greece	351	351	195	195	202	202	183	183	174	174	230	230	267	267	246	246	254	254	214	214	228	228	290	290	282	282	280	280	216	216	258	258	210	210	351	351	208	208	296	296	304	304
185	185_1	HOR1385	Hordeum vulgare L. convar. distichon (L.) Alef. var. nutans (Rode) Alef.	2	H		Greece	351	351	195	195	202	202	183	183	174	174	230	230	264	264	244	244	256	256	212	212	224	224	290	290	274	274	276	276	213	213	270	270	207	207	351	351	204	204	296	296	302	302
186	186_1	HOR1386	Hordeum vulgare L. convar. distichon (L.) Alef. var. nutans (Rode) Alef.	2	H		Greece	351	351	195	195	202	202	165	174	174	174	226	226	264	264	244	244	254	254	214	214	228	228	286	286	282	282	280	280	216	216	258	258	210	210	336	336	204	204	296	296	304	304
187	187_4	HOR1737	Hordeum vulgare L. convar. distichon (L.) Alef. var. nutans (Rode) Alef.	2	H		Greece	351	351	201	201	202	202	174	174	174	174	230	230	267	267	246	246	254	254	214	214	228	228	290	290	274	274	276	276	216	216	267	267	210	210	336	336	208	208	300	300	304	304
188	188_1	HOR1943	Hordeum vulgare L. convar. distichon (L.) Alef. var. nutans (Rode) Alef.	2	H		Greece	351	351	195	195	200	200	180	180	165	165	246	246	264	264	244	244	254	254	214	214	224	224	286	286	274	274	280	280	213	213	258	258	213	213	351	351	204	204	300	300	302	302
189	189_3	HOR2674	Hordeum vulgare L. convar. distichon (L.) Alef. var. erectum (Rode) Alef.	2	H		Greece	351	351	201	201	202	202	183	183	174	174	262	262	264	264	246	246	254	254	214	214	228	228	286	286	274	274	280	280	216	216	258	258	210	210	336	336	212	212	296	296	302	302
190	190_4	HOR1931	Hordeum vulgare L. convar. distichon (L.) Alef. var. nutans (Rode) Alef.	2	H		Hungary	351	351	195	195	202	202	183	183	174	174	230	230	267	267	246	246	264	264	214	214	228	228	286	286	282	282	280	280	213	213	258	258	210	210	336	336	208	208	296	296	302	302
191	191_1	HOR3759	Hordeum vulgare L. convar. distichon (L.) Alef. var. nutans (Rode) Alef.	2	H		Hungary	351	351	195	195	196	196	174	174	174	174	230	230	264	264	244	244	264	264	214	214	224	224	290	290	282	282	280	280	213	213	258	258	210	210	336	336	204	204	296	296	294	294
192	192_2	HOR2770	Hordeum vulgare L. convar. distichon (L.) Alef. var. nutans (Rode) Alef.	2	H		Iran	351	351	195	195	206	206	174	174	174	174	202	202	267	267	244	244	254	254	214	214	224	224	290	290	274	274	280	280	213	213	264	264	210	210	351	351	204	204	296	296	302	302
193	193_2	HOR2771	Hordeum vulgare L. convar. distichon (L.) Alef. var. nutans (Rode) Alef.	2	H		Iran	351	351	201	201	212	212	174	174	174	174	202	202	267	267	244	244	266	266	214	214	224	224	290	290	274	274	280	280	213	213	264	264	210	210	351	351	204	204	296	296	302	302
195	195_3	HOR2785	Hordeum vulgare L. convar. distichon (L.) Alef. var. nutans (Rode) Alef.	2	H		Iran	351	351	195	195	206	206	174	174	174	174	202	202	267	267	244	244	264	264	214	214	224	224	290	290	274	274	280	280	213	213	264	264	210	210	351	-99999	208	208	296	296	304	304
196	196_2	HOR2792	Hordeum vulgare L. convar. distichon (L.) Alef. var. nutans (Rode) Alef.	2	H		Iran	351	351	201	201	202	202	174	174	174	174	202	202	267	267	-99999	-99999	254	254	212	212	228	228	294	294	274	274	280	280	213	213	264	264	210	210	351	351	200	200	288	288	302	302
197	197_2	HOR2793	Hordeum vulgare L. convar. distichon (L.) Alef. var. nutans (Rode) Alef.	2	H		Iran	351	351	195	195	212	212	-99999	-99999	174	174	202	202	267	267	246	246	254	254	212	212	228	228	286	286	274	274	280	280	216	216	-99999	-99999	210	210	351	351	204	204	288	288	304	304
198	198_2	HOR2794	Hordeum vulgare L. convar. distichon (L.) Alef. var. nutans (Rode) Alef.	2	H		Iran	351	351	201	201	202	202	177	177	174	174	202	202	267	267	246	246	254	254	212	212	228	228	286	286	274	274	280	280	216	216	264	264	210	210	351	351	208	208	288	288	302	302
199	199_4	HOR2795	Hordeum vulgare L. convar. distichon (L.) Alef. var. nutans (Rode) Alef.	2	H		Iran	351	351	195	195	212	212	177	177	174	174	202	202	267	267	246	246	254	254	212	212	228	228	286	286	274	274	280	280	216	216	264	264	210	210	345	345	204	204	296	296	302	302
200	200_2	HOR2796	Hordeum vulgare L. convar. distichon (L.) Alef. var. nutans (Rode) Alef.	2	H		Iran	351	351	195	195	196	196	177	177	174	174	202	202	267	267	246	246	266	266	212	212	228	228	286	286	274	274	280	280	216	216	264	264	210	210	345	345	200	200	288	288	304	304
201	201_2	HOR2797	Hordeum vulgare L. convar. distichon (L.) Alef. var. nutans (Rode) Alef.	2	H		Iran	351	351	195	195	196	196	177	177	174	174	202	202	267	267	246	246	254	254	212	212	228	228	286	286	274	274	280	280	216	216	264	264	207	207	351	351	204	204	288	288	302	302
202	202_4	HOR2803	Hordeum vulgare L. convar. distichon (L.) Alef. var. nutans (Rode) Alef.	2	H		Iran	351	351	195	201	206	206	165	165	168	168	194	194	264	264	244	244	256	266	214	214	224	224	290	290	274	274	282	282	213	213	264	264	210	210	351	351	196	208	296	296	304	304
203	203_4	HOR2804	Hordeum vulgare L. convar. distichon (L.) Alef. var. nutans (Rode) Alef.	2	H		Iran	351	351	195	195	212	212	177	177	174	174	242	242	264	264	246	246	258	258	214	214	228	228	284	284	276	276	282	282	213	213	267	267	207	207	351	351	204	204	284	284	304	304
204	204_3	HOR2807	Hordeum vulgare L. convar. distichon (L.) Alef. var. nutans (Rode) Alef.	2	H		Iran	351	351	201	201	206	206	174	174	174	174	202	202	267	267	244	244	266	266	214	214	224	224	290	290	274	274	282	282	213	213	264	264	210	210	351	351	208	208	296	296	304	304
205	205_1	HOR2808	Hordeum vulgare L. convar. distichon (L.) Alef. var. nutans (Rode) Alef.	2	H		Iran	351	351	201	201	212	212	174	174	174	174	202	202	267	267	244	244	266	266	214	214	224	224	290	290	274	274	282	282	213	213	264	264	210	210	351	351	204	204	296	296	302	302
206	206_2	HOR2809	Hordeum vulgare L. convar. distichon (L.) Alef. var. nutans (Rode) Alef.	2	H		Iran	351	351	201	201	206	206	174	174	174	174	202	202	264	264	244	244	266	266	214	214	224	224	290	290	274	274	282	282	213	213	264	264	210	210	351	351	208	208	296	296	304	304
207	207_4	HOR2810	Hordeum vulgare L. convar. distichon (L.) Alef. var. nutans (Rode) Alef.	2	H		Iran	351	351	195	195	212	212	174	174	174	174	202	202	267	267	244	244	264	264	214	214	224	224	290	290	274	274	282	282	213	213	264	264	210	210	351	351	204	204	296	296	304	304
208	208_4	HOR2815	Hordeum vulgare L. convar. distichon (L.) Alef. var. medicum Körn.	2	H		Iran	348	348	195	195	212	212	180	180	174	174	202	202	264	264	244	244	264	264	214	214	224	224	292	292	274	274	282	282	213	213	258	258	210	210	351	351	208	208	296	296	304	304
209	209_4	HOR2816	Hordeum vulgare L. convar. distichon (L.) Alef. var. nutans (Rode) Alef.	2	H		Iran	348	348	195	195	212	212	180	180	174	174	202	202	264	264	244	244	264	264	214	214	224	224	292	292	274	274	282	282	213	213	258	258	210	210	351	351	208	208	296	296	304	304
210	210_1	HOR2818	Hordeum vulgare L. convar. distichon (L.) Alef. var. nutans (Rode) Alef.	2	H		Iran	351	351	201	201	206	206	162	162	165	165	194	194	267	267	244	244	252	266	216	216	224	224	290	290	274	274	282	282	213	213	264	264	210	210	351	351	204	204	296	296	302	302
211	211_3	HOR2819	Hordeum vulgare L. convar. distichon (L.) Alef. var. nutans (Rode) Alef.	2	H		Iran	351	351	195	195	206	206	174	174	174	174	202	202	267	267	244	244	264	264	214	214	224	224	290	290	274	274	282	282	213	213	264	264	210	210	351	351	208	208	296	296	304	304
212	212_4	HOR2820	Hordeum vulgare L. convar. distichon (L.) Alef. var. medicum Körn.	2	H		Iran	351	351	201	201	204	204	174	174	174	174	202	202	264	264	244	244	266	266	214	214	224	224	290	290	274	274	282	282	213	213	264	264	210	210	351	351	212	212	296	296	302	302
213	213_2	HOR2823	Hordeum vulgare L. convar. distichon (L.) Alef. var. nutans (Rode) Alef.	2	H		Iran	351	351	195	195	206	206	174	174	174	174	194	202	267	267	244	244	264	264	214	214	224	224	290	290	274	274	282	282	213	213	264	264	210	210	351	351	208	208	296	296	304	304
214	214_4	HOR2824	Hordeum vulgare L. convar. distichon (L.) Alef. var. medicum Körn.	2	H		Iran	351	351	201	201	206	206	174	174	174	174	202	202	267	267	244	244	264	264	214	214	224	224	290	290	274	274	282	282	213	213	264	264	210	210	351	351	204	204	296	296	304	304
215	215_1	HOR2828	Hordeum vulgare L. convar. distichon (L.) Alef. var. nutans (Rode) Alef.	2	H		Iran	351	351	195	195	202	202	174	174	174	174	202	202	267	267	246	246	264	264	212	212	224	224	290	290	274	274	282	282	213	213	264	264	210	210	351	351	200	200	296	296	302	302
216	216_3	HOR2829	Hordeum vulgare L. convar. distichon (L.) Alef. var. nutans (Rode) Alef.	2	H		Iran	351	351	201	201	206	206	174	174	174	174	202	202	267	267	244	244	266	266	216	216	224	224	290	290	274	274	282	282	213	213	264	264	210	210	351	351	204	204	296	296	302	302
217	217_3	HOR2830	Hordeum vulgare L. convar. distichon (L.) Alef. var. medicum Körn.	2	H		Iran	351	351	195	195	202	202	174	174	174	174	202	202	267	267	246	246	264	264	212	212	228	228	290	290	274	274	282	282	213	213	267	267	210	210	345	345	200	200	284	284	302	302
218	218_1	HOR2831	Hordeum vulgare L. convar. distichon (L.) Alef. var. medicum Körn.	2	H		Iran	351	351	201	201	212	212	174	174	174	174	202	202	264	264	244	244	266	266	214	214	228	228	290	290	274	274	282	282	213	213	264	264	210	210	351	351	208	208	296	296	304	304
219	219_2	HOR2833	Hordeum vulgare L. convar. distichon (L.) Alef. var. nutans (Rode) Alef.	2	H		Iran	351	351	201	201	212	212	174	174	174	174	202	202	264	264	244	244	266	266	214	214	224	224	290	290	274	274	282	282	213	213	264	264	210	210	351	351	208	208	296	296	304	304
220	220_1	HOR2838	Hordeum vulgare L. convar. distichon (L.) Alef. var. nutans (Rode) Alef.	2	H		Iran	351	351	195	195	212	212	177	177	174	174	202	202	267	267	246	246	258	258	212	212	228	228	286	286	274	274	282	282	216	216	264	264	210	210	345	345	204	204	292	292	302	302
221	221_2	HOR2841	Hordeum vulgare L. convar. distichon (L.) Alef. var. medicum Körn.	2	H		Iran	351	351	201	201	206	206	174	174	174	174	202	202	267	267	244	244	264	264	214	214	224	224	290	290	274	274	282	282	213	213	264	264	210	210	351	351	204	204	296	296	302	302
222	222_1	HOR2844	Hordeum vulgare L. convar. distichon (L.) Alef. var. medicum Körn.	2	H		Iran	351	351	201	201	212	212	174	174	174	174	202	202	264	264	244	244	266	266	214	214	224	224	290	290	274	274	282	282	213	213	264	264	210	210	351	351	212	212	296	296	302	302
223	223_3	HOR2845	Hordeum vulgare L. convar. distichon (L.) Alef. var. nutans (Rode) Alef.	2	H		Iran	351	351	201	201	206	206	186	186	174	174	202	202	267	267	244	244	254	254	214	214	224	224	290	290	274	274	282	282	213	213	264	264	210	210	351	351	204	204	296	296	302	302
224	224_1	HOR2849	Hordeum vulgare L. convar. distichon (L.) Alef. var. nigrescens Körn.	2	H		Iran	351	351	195	195	202	202	180	180	174	174	230	230	264	264	246	246	266	266	214	214	224	224	290	290	282	282	282	282	213	213	267	267	207	207	351	351	208	208	296	296	302	302
225	225_3	HOR2851	Hordeum vulgare L. convar. distichon (L.) Alef. var. persicum Körn.	2	H		Iran	351	351	195	195	202	202	180	180	174	174	230	230	264	264	246	246	266	266	214	214	224	224	290	290	282	282	282	282	213	213	267	267	207	207	351	351	208	208	296	296	302	302
226	226_2	HOR2852	Hordeum vulgare L. convar. distichon (L.) Alef. var. nigrescens Körn.	2	H		Iran	351	351	195	195	202	202	180	180	174	174	202	202	264	264	246	246	266	266	214	214	224	224	290	290	282	282	282	282	213	213	267	267	207	207	351	351	208	208	296	296	302	302
227	227_2	HOR2853	Hordeum vulgare L. convar. distichon (L.) Alef. var. nigricans Sér.	2	H		Iran	351	351	195	195	202	202	180	180	174	174	230	230	264	264	246	246	266	266	214	214	224	224	290	290	282	282	282	282	213	213	267	267	207	207	351	351	208	208	296	296	302	302
228	228_1	HOR2857	Hordeum vulgare L. convar. distichon (L.) Alef. var. medicum Körn.	2	H		Iran	351	351	204	204	216	216	174	174	174	174	202	202	264	264	246	246	266	266	212	212	228	228	284	284	274	274	278	278	213	213	264	264	207	207	351	351	200	200	288	288	302	302
229	229_2	HOR2858	Hordeum vulgare L. convar. distichon (L.) Alef. var. nutans (Rode) Alef.	2	H		Iran	351	351	195	195	206	206	174	174	174	174	202	202	267	267	244	244	254	254	214	214	224	224	290	290	274	274	282	282	213	213	264	264	210	210	351	351	204	204	296	296	304	304
230	230_2	HOR2867	Hordeum vulgare L. convar. distichon (L.) Alef. var. nutans (Rode) Alef.	2	H		Iran	351	351	201	201	206	206	174	174	174	174	202	202	264	264	244	244	266	266	214	214	224	224	290	290	274	274	282	282	213	213	264	264	210	210	351	351	212	212	296	296	302	302
231	231_1	HOR2868	Hordeum vulgare L. convar. distichon (L.) Alef. var. nigricans Sér.	2	H		Iran	351	351	195	195	202	202	180	180	174	174	230	230	264	264	246	246	266	266	214	214	224	224	290	290	282	282	282	282	210	210	264	264	207	207	351	351	200	200	296	296	302	302
232	232_4	HOR2869	Hordeum vulgare L. convar. distichon (L.) Alef. var. nutans (Rode) Alef.	2	H		Iran	336	336	201	201	202	202	174	174	165	165	230	230	264	264	246	246	254	254	212	212	224	224	284	284	274	274	280	280	210	210	267	267	210	210	324	324	204	204	296	296	294	294
233	233_1	HOR2870	Hordeum vulgare L. convar. distichon (L.) Alef. var. nutans (Rode) Alef.	2	H		Iran	336	336	204	204	214	214	180	180	174	174	202	202	267	267	-99999	-99999	264	264	214	214	228	228	292	292	276	276	278	278	216	216	264	264	210	210	345	345	200	200	296	296	294	294
234	234_1	HOR2872	Hordeum vulgare L. convar. distichon (L.) Alef. var. medicum Körn.	2	H		Iran	351	351	195	195	212	212	174	174	174	174	202	202	267	267	244	244	264	264	214	214	228	228	290	290	274	274	282	282	213	213	264	264	210	210	351	351	208	208	296	296	304	304
235	235_1	HOR2881	Hordeum vulgare L. convar. distichon (L.) Alef. var. medicum Körn.	2	H		Iran	351	351	195	195	206	206	174	174	174	174	194	202	264	264	246	246	252	264	214	214	228	228	290	290	274	274	282	282	213	213	267	267	213	213	351	351	200	200	284	284	302	302
236	236_2	HOR3520	Hordeum vulgare L. convar. distichon (L.) Alef. var. medicum Körn.	2	H		Iran	351	351	195	195	202	202	174	174	174	174	202	202	264	264	246	246	266	266	212	212	224	224	286	286	274	274	282	282	213	213	258	258	210	210	351	351	200	200	284	284	302	302
237	237_3	HOR10479	Hordeum vulgare L. convar. distichon (L.) Alef. var. nigrescens Körn.	2	H		Iraq	351	351	195	195	202	202	174	174	171	171	202	202	267	267	246	246	254	254	214	214	228	228	292	292	276	276	282	282	213	213	258	258	210	210	351	351	208	208	288	288	302	302
238	238_2	HOR10480	Hordeum vulgare L. convar. distichon (L.) Alef. var. nigrescens Körn.	2	H		Iraq	351	351	195	195	202	202	177	177	174	174	202	202	267	267	246	246	254	254	214	214	228	228	292	292	276	276	282	282	213	213	267	267	210	210	351	351	204	204	296	296	302	302
239	239_1	HOR10603	Hordeum vulgare L. convar. distichon (L.) Alef. var. nigrescens Körn.	2	H		Iraq	351	351	195	195	202	202	174	174	174	174	202	202	267	267	246	246	264	264	214	214	228	228	292	292	276	276	282	282	213	213	258	258	210	210	351	351	200	200	292	292	302	302
240	240_2	HOR10610	Hordeum vulgare L. convar. distichon (L.) Alef. var. nutans (Rode) Alef.	2	H		Iraq	351	351	195	195	202	202	174	174	174	174	202	202	267	267	246	246	254	254	214	214	228	228	292	292	276	276	282	282	213	213	258	258	210	210	-99999	-99999	200	200	288	288	302	302
241	241_3	HOR10611	Hordeum vulgare L. convar. distichon (L.) Alef. var. nigrescens Körn.	2	H		Iraq	351	351	195	195	202	202	177	177	174	174	202	202	267	267	244	244	266	266	214	214	228	228	292	292	274	274	282	282	213	213	258	258	207	207	351	351	208	208	288	288	304	304
242	242_4	HOR10613	Hordeum vulgare L. convar. distichon (L.) Alef. var. nigrescens Körn.	2	H		Iraq	351	351	195	195	202	202	177	177	174	174	202	202	267	267	246	246	266	266	214	214	228	228	294	294	276	276	282	282	216	216	264	264	210	210	351	351	208	208	288	288	304	304
243	243_3	HOR10616	Hordeum vulgare L. convar. distichon (L.) Alef. var. nigrescens Körn.	2	H		Iraq	351	351	195	195	202	202	177	177	174	174	202	202	267	267	246	246	254	254	214	214	228	228	292	292	276	276	282	282	213	213	267	267	210	210	345	345	208	208	288	288	302	302
245	245_4	HOR10620	Hordeum vulgare L. convar. distichon (L.) Alef. var. nutans (Rode) Alef.	2	H		Iraq	351	351	195	195	220	220	174	174	174	174	202	202	264	264	244	244	264	264	214	214	224	224	286	286	276	276	282	282	216	216	258	258	204	204	351	351	200	200	296	296	302	302
246	246_1	HOR10626	Hordeum vulgare L. convar. distichon (L.) Alef. var. nutans (Rode) Alef.	2	H		Iraq	351	351	195	195	220	220	174	174	174	174	202	202	258	258	248	248	266	266	214	214	224	224	286	286	274	274	282	282	213	213	258	258	210	210	351	351	208	208	296	296	302	302
247	247_1	HOR10628	Hordeum vulgare L. convar. distichon (L.) Alef. var. persicum Körn.	2	H		Iraq	351	351	195	195	220	220	174	174	174	174	202	202	258	258	248	248	266	266	214	214	224	224	286	286	274	274	282	282	213	213	258	258	210	210	351	351	208	208	296	296	302	302
248	248_2	HOR10651	Hordeum vulgare L. convar. distichon (L.) Alef. var. nutans (Rode) Alef.	2	H		Iraq	351	351	195	195	202	202	174	174	174	174	230	230	264	264	246	246	266	266	214	214	224	224	292	292	282	282	282	282	210	210	264	264	207	207	351	351	208	208	296	296	302	302
249	249_4	HOR10767	Hordeum vulgare L. convar. distichon (L.) Alef. var. nutans (Rode) Alef.	2	H		Iraq	351	351	195	195	220	220	174	174	174	174	202	202	264	264	244	244	250	264	214	214	224	224	286	286	276	276	282	282	216	216	258	258	204	204	351	351	200	200	296	296	302	302
250	250_1	HOR10621	Hordeum vulgare L. convar. distichon (L.) Alef.	2	H		Iraq	351	351	195	195	202	202	177	177	174	174	202	202	267	267	246	246	254	254	214	214	228	228	292	292	276	276	282	282	213	213	267	267	210	210	351	351	200	200	292	292	302	302
252	252_3	HOR10412	Hordeum vulgare L. convar. distichon (L.) Alef. var. nutans (Rode) Alef.	2	H		Italy	351	351	195	195	216	216	174	174	174	174	230	230	267	267	246	246	254	254	212	212	224	224	290	290	274	274	282	282	216	216	264	267	207	207	351	351	208	208	296	296	302	302
253	253_3	HOR10475	Hordeum vulgare L. convar. distichon (L.) Alef. var. nutans (Rode) Alef.	2	H		Italy	351	351	195	195	212	212	177	177	174	174	222	222	264	264	244	244	264	264	214	214	228	228	290	290	282	282	282	282	210	210	258	258	210	210	336	336	208	208	300	300	302	302
256	256_4	HOR10782	Hordeum vulgare L. convar. distichon (L.) Alef. var. nutans (Rode) Alef.	2	H		Italy	351	351	195	195	200	200	177	177	174	174	222	222	264	264	244	244	254	254	212	212	228	228	286	286	282	282	282	282	213	213	258	258	210	210	336	336	208	208	296	296	304	304
261	261_1	HOR10833	Hordeum vulgare L. convar. distichon (L.) Alef. var. nutans (Rode) Alef.	2	H		Italy	351	351	195	195	212	212	177	177	174	174	222	222	264	264	244	244	264	264	214	214	228	228	290	290	282	282	282	282	213	213	258	258	210	210	336	336	208	208	296	296	302	302
262	262_1	HOR10834	Hordeum vulgare L. convar. distichon (L.) Alef. var. nutans (Rode) Alef.	2	H		Italy	351	351	195	195	200	200	177	177	174	174	218	218	267	267	244	244	256	256	214	214	228	228	290	290	282	282	282	282	216	216	258	258	210	210	351	351	204	204	300	300	302	302
263	263_3	HOR10937	Hordeum vulgare L. convar. distichon (L.) Alef. var. nutans (Rode) Alef.	2	H		Italy	351	351	195	195	210	210	180	180	174	174	222	222	264	264	246	246	264	264	214	214	228	228	286	286	282	282	282	282	216	216	258	258	210	210	351	351	208	208	296	296	302	302
264	264_1	HOR10992	Hordeum vulgare L. convar. distichon (L.) Alef. var. erectum (Rode) Alef.	2	H		Italy	351	351	195	195	212	212	177	177	174	174	238	238	264	264	246	246	256	256	212	212	228	228	286	286	282	282	276	276	216	216	264	267	210	210	351	351	216	216	296	296	302	302
265	265_1	HOR11123	Hordeum vulgare L. convar. distichon (L.) Alef. var. nutans (Rode) Alef.	2	H		Italy	351	351	195	195	212	212	177	177	174	174	222	222	264	264	244	244	264	264	214	214	228	228	290	290	282	282	282	282	213	213	258	258	210	210	336	336	196	208	296	296	302	302
267	267_1	HOR4720	Hordeum vulgare L. convar. distichon (L.) Alef. var. erectum (Rode) Alef.	2	H		Lettland	351	351	195	195	196	196	177	177	174	174	230	230	264	264	244	244	264	264	212	212	224	224	284	284	274	274	274	274	210	210	267	267	207	207	351	351	208	208	296	296	294	294
268	268_1	HOR9724	Hordeum vulgare L. convar. distichon (L.) Alef. var. nutans (Rode) Alef.	2	H		Libya	351	351	201	201	196	196	177	177	165	165	230	230	264	264	244	244	254	254	212	212	224	224	286	286	274	274	278	278	210	210	267	267	207	207	336	336	208	208	296	296	302	302
269	269_1	HOR9846	Hordeum vulgare L. convar. distichon (L.) Alef. var. nutans (Rode) Alef.	2	H		Libya	351	351	201	201	200	200	183	183	174	174	230	230	264	264	244	244	254	254	214	214	228	228	290	290	274	274	278	278	216	216	258	258	207	207	336	336	208	208	296	296	304	304
270	270_2	HOR9847	Hordeum vulgare L. convar. distichon (L.) Alef. var. nutans (Rode) Alef.	2	H		Libya	351	351	201	201	200	200	183	183	174	174	230	230	264	264	244	244	254	254	214	214	228	228	290	290	274	274	278	278	216	216	258	258	207	207	336	336	208	208	296	296	304	304
271	271_1	HOR9877	Hordeum vulgare L. convar. distichon (L.) Alef. var. nutans (Rode) Alef.	2	H		Libya	351	351	201	201	202	208	177	177	165	165	230	230	264	264	244	244	256	256	212	212	224	224	286	286	274	274	278	278	216	216	267	267	207	207	336	336	208	208	300	300	294	294
272	272_1	HOR9880	Hordeum vulgare L. convar. distichon (L.) Alef. var. nutans (Rode) Alef.	2	H		Libya	351	351	201	201	196	196	177	177	165	165	230	230	264	264	244	244	254	254	212	212	224	224	286	286	274	274	278	278	210	210	267	267	207	207	336	336	208	208	296	296	302	302
273	273_3	HOR9883	Hordeum vulgare L. convar. distichon (L.) Alef. var. nutans (Rode) Alef.	2	H		Libya	351	351	201	201	196	196	177	177	165	165	230	230	264	264	244	244	254	254	212	212	224	224	286	286	274	274	278	278	210	210	267	267	207	207	336	336	208	208	296	296	302	302
274	274_1	HOR10084	Hordeum vulgare L. convar. distichon (L.) Alef. var. nutans (Rode) Alef.	2	H		Libya	351	351	195	195	200	208	177	177	174	174	230	230	264	264	244	244	256	256	214	214	228	228	286	286	282	282	282	282	216	216	267	267	207	207	336	336	208	208	300	300	304	304
275	275_2	HOR10086	Hordeum vulgare L. convar. distichon (L.) Alef. var. nutans (Rode) Alef.	2	H		Libya	351	351	195	195	210	210	174	174	174	174	230	230	264	264	244	244	254	254	214	214	228	228	286	286	-99999	-99999	278	278	216	216	267	267	207	207	336	336	208	208	300	300	294	294
276	276_1	HOR10099	Hordeum vulgare L. convar. distichon (L.) Alef. var. nutans (Rode) Alef.	2	H		Libya	351	351	195	195	202	202	174	174	174	174	266	266	267	267	244	244	264	264	212	212	224	224	286	286	274	274	282	282	213	213	258	258	210	210	351	351	208	208	296	296	302	302
277	277_2	HOR10162	Hordeum vulgare L. convar. distichon (L.) Alef. var. nutans (Rode) Alef.	2	H		Libya	351	351	201	201	202	202	183	183	174	174	230	230	264	264	246	246	254	254	214	214	228	228	290	290	274	274	282	282	216	216	258	258	207	207	336	336	208	208	296	296	304	304
278	278_1	HOR10167	Hordeum vulgare L. convar. distichon (L.) Alef. var. nutans (Rode) Alef.	2	H		Libya	351	351	201	201	200	200	183	183	174	174	230	230	264	264	244	244	254	254	214	214	228	228	290	290	274	274	278	278	216	216	258	258	210	210	336	336	208	208	296	296	304	304
279	279_1	HOR10169	Hordeum vulgare L. convar. distichon (L.) Alef. var. nutans (Rode) Alef.	2	H		Libya	351	351	201	201	200	200	183	183	174	174	230	230	264	264	244	244	254	254	214	214	228	228	290	290	274	274	278	278	216	216	258	258	207	207	336	336	208	208	296	296	304	304
280	280_1	HOR10280	Hordeum vulgare L. convar. distichon (L.) Alef. var. nutans (Rode) Alef.	2	H		Libya	351	351	195	195	200	200	177	177	165	165	246	246	264	264	246	246	256	256	214	214	228	228	286	286	274	274	282	282	219	219	267	267	207	207	339	345	204	204	288	288	304	304
281	281_4	HOR4719	Hordeum vulgare L. convar. distichon (L.) Alef. var. nutans (Rode) Alef.	2	H		Litauen	351	351	195	195	202	202	177	177	174	174	230	230	264	264	246	246	264	264	214	214	228	228	284	284	282	282	282	282	213	213	258	258	210	210	336	336	208	208	296	296	302	302
282	282_2	HOR13411	Hordeum vulgare L. convar. distichon (L.) Alef. var. nutans (Rode) Alef.	2	H		Marocco	351	351	195	195	212	212	183	183	174	174	222	222	264	264	244	244	264	264	214	214	228	228	286	286	282	282	282	282	213	213	258	258	210	210	351	351	208	208	296	296	302	302
283	283_2	HOR14074	Hordeum vulgare L. convar. distichon (L.) Alef. var. nutans (Rode) Alef.	2	H		Netherlands	351	351	195	195	210	210	174	174	174	174	230	230	264	264	244	244	254	254	214	214	228	228	290	290	282	282	282	282	216	216	258	258	210	210	351	351	204	204	296	296	304	304
284	284_1	HOR7484	Hordeum vulgare L. convar. distichon (L.) Alef. var. nutans (Rode) Alef.	2	H		Poland	351	351	195	195	200	200	174	174	174	174	230	230	264	264	244	244	254	254	214	214	228	228	286	286	282	282	282	282	216	216	258	258	210	210	351	351	204	204	296	296	302	302
285	285_1	HOR7485	Hordeum vulgare L. convar. distichon (L.) Alef. var. nutans (Rode) Alef.	2	H		Poland	351	351	195	195	196	196	177	177	174	174	230	230	264	264	246	246	256	256	212	212	228	228	286	286	-99999	-99999	282	282	213	213	258	258	210	210	351	351	208	208	296	296	294	294
286	286_3	HOR7487	Hordeum vulgare L. convar. distichon (L.) Alef. var. nutans (Rode) Alef.	2	H		Poland	351	351	195	195	200	200	177	177	174	174	230	230	267	267	244	244	254	254	214	214	228	228	286	286	282	282	282	282	213	213	258	258	210	210	336	336	208	208	296	296	302	302
287	287_3	HOR7514	Hordeum vulgare L. convar. distichon (L.) Alef. var. nutans (Rode) Alef.	2	H		Poland	351	351	195	195	202	202	177	177	174	174	230	230	264	264	244	244	264	264	214	214	228	228	290	290	282	282	282	282	213	213	258	258	210	210	351	351	208	208	296	296	302	302
288	288_4	HOR7515	Hordeum vulgare L. convar. distichon (L.) Alef. var. nutans (Rode) Alef.	2	H		Poland	351	351	195	195	200	200	177	177	174	174	222	222	267	267	244	244	254	254	214	214	228	228	284	284	282	282	282	282	213	213	258	258	210	210	351	351	204	204	300	300	302	302
289	289_4	HOR7516	Hordeum vulgare L. convar. distichon (L.) Alef. var. nutans (Rode) Alef.	2	H		Poland	351	351	201	201	202	202	174	174	174	174	258	258	267	267	246	246	254	254	212	212	228	228	284	284	282	282	282	282	216	216	258	258	207	207	351	351	208	208	300	300	302	302
290	290_1	HOR7519	Hordeum vulgare L. convar. distichon (L.) Alef. var. nutans (Rode) Alef.	2	H		Poland	351	351	195	195	200	200	177	177	174	174	230	230	267	267	244	244	264	264	214	214	228	228	286	286	282	282	282	282	213	213	258	258	210	210	336	336	208	208	296	296	302	302
292	292_3	HOR7521	Hordeum vulgare L. convar. distichon (L.) Alef. var. nutans (Rode) Alef.	2	H		Poland	351	351	195	195	200	200	177	177	174	174	222	222	264	264	244	244	254	254	214	214	228	228	286	286	282	282	282	282	213	213	258	258	210	210	336	336	208	208	296	296	302	302
293	293_4	HOR7523	Hordeum vulgare L. convar. distichon (L.) Alef. var. nutans (Rode) Alef.	2	H		Poland	351	351	195	195	202	202	177	177	174	174	222	222	267	267	244	244	254	254	214	214	224	224	284	284	282	282	282	282	213	213	267	267	210	210	351	351	204	204	296	296	294	294
294	294_1	HOR7524	Hordeum vulgare L. convar. distichon (L.) Alef. var. nutans (Rode) Alef.	2	H		Poland	351	351	195	195	196	196	177	177	174	174	230	230	264	264	246	246	256	256	212	212	228	228	286	286	282	282	282	282	213	213	258	258	210	210	351	351	208	208	296	296	294	294
295	295_3	HOR7526	Hordeum vulgare L. convar. distichon (L.) Alef. var. nutans (Rode) Alef.	2	H		Poland	351	351	195	195	200	200	177	177	174	174	230	230	264	264	244	244	254	254	212	212	228	228	284	284	274	274	282	282	213	213	267	267	207	207	336	336	204	204	296	296	302	302
297	297_3	HOR7528	Hordeum vulgare L. convar. distichon (L.) Alef. var. nutans (Rode) Alef.	2	H		Poland	351	351	195	195	212	212	177	177	174	174	222	222	264	264	244	244	264	264	214	214	228	228	290	290	282	282	282	282	213	213	258	258	210	210	336	336	208	208	296	296	302	302
300	300_1	HOR7531	Hordeum vulgare L. convar. distichon (L.) Alef. var. nutans (Rode) Alef.	2	H		Poland	351	351	195	195	202	202	177	177	174	174	230	230	267	267	246	246	264	264	214	214	228	228	290	290	282	282	282	282	213	213	258	258	210	210	351	351	208	208	296	296	302	302
301	301_4	HOR7532	Hordeum vulgare L. convar. distichon (L.) Alef. var. nutans (Rode) Alef.	2	H		Poland	351	351	195	195	200	200	177	177	174	174	222	222	264	264	-99999	-99999	264	264	214	214	228	228	286	286	282	282	282	282	213	213	258	258	210	210	336	336	208	208	296	296	302	302
304	304_3	HOR7537	Hordeum vulgare L. convar. distichon (L.) Alef. var. nutans (Rode) Alef.	2	H		Poland	351	351	195	195	200	200	177	177	174	174	222	222	264	264	244	244	264	264	214	214	228	228	286	286	282	282	282	282	213	213	258	258	210	210	336	336	208	208	296	296	302	302
305	305_2	HOR7538	Hordeum vulgare L. convar. distichon (L.) Alef. var. nutans (Rode) Alef.	2	H		Poland	351	351	195	195	202	202	177	177	174	174	230	230	264	264	244	244	254	254	214	214	228	228	290	290	282	282	278	278	216	216	267	267	210	210	336	336	208	208	296	296	302	302
306	306_2	HOR7540	Hordeum vulgare L. convar. distichon (L.) Alef. var. nutans (Rode) Alef.	2	H		Poland	351	351	195	195	200	208	177	177	174	174	230	230	264	264	244	244	254	254	214	214	228	228	290	290	282	282	282	282	216	216	258	258	207	207	351	351	208	208	296	296	302	302
307	307_3	HOR7541	Hordeum vulgare L. convar. distichon (L.) Alef. var. nutans (Rode) Alef.	2	H		Poland	351	351	195	195	202	202	177	177	174	174	230	230	264	264	244	244	254	254	214	214	228	228	290	290	282	282	278	278	216	216	267	267	210	210	336	336	208	208	296	296	302	302
308	308_4	HOR7542	Hordeum vulgare L. convar. distichon (L.) Alef. var. nutans (Rode) Alef.	2	H		Poland	351	351	195	195	202	202	177	177	174	174	222	222	264	264	244	244	264	264	214	214	228	228	290	290	282	282	274	274	216	216	258	258	210	210	351	351	208	208	300	300	294	294
309	309_4	HOR8808	Hordeum vulgare L. convar. distichon (L.) Alef. var. nutans (Rode) Alef.	2	H		Poland	351	351	195	195	200	200	177	177	174	174	222	222	264	264	244	244	264	264	214	214	228	228	286	286	282	282	282	282	213	213	258	258	210	210	336	336	208	208	296	296	302	302
310	310_3	HOR8811	Hordeum vulgare L. convar. distichon (L.) Alef. var. nutans (Rode) Alef.	2	H		Poland	351	351	195	195	200	208	177	177	174	174	222	222	-99999	-99999	244	244	254	254	214	214	224	224	284	284	282	282	282	282	213	213	267	267	210	210	-99999	-99999	204	204	300	300	302	302
311	311_4	HOR8812	Hordeum vulgare L. convar. distichon (L.) Alef. var. nutans (Rode) Alef.	2	H		Poland	351	351	189	189	200	208	171	171	174	174	222	222	264	264	244	244	254	254	214	214	224	224	284	284	282	282	282	282	213	213	267	267	207	207	351	351	204	204	300	300	302	302
312	312_2	HOR8816	Hordeum vulgare L. convar. distichon (L.) Alef. var. nutans (Rode) Alef.	2	H		Poland	351	351	195	195	202	202	177	177	174	174	230	230	267	267	244	244	254	254	212	212	228	228	284	284	274	274	282	282	216	216	258	258	207	207	336	336	208	208	296	296	294	294
313	313_2	HOR8817	Hordeum vulgare L. convar. distichon (L.) Alef. var. nutans (Rode) Alef.	2	H		Poland	351	351	195	195	200	208	177	177	174	174	230	230	264	264	244	244	254	254	214	214	228	228	-99999	-99999	282	282	282	282	216	216	258	258	207	207	351	351	208	208	296	296	302	302
314	314_4	HOR8818	Hordeum vulgare L. convar. distichon (L.) Alef. var. nutans (Rode) Alef.	2	H		Poland	351	351	195	195	196	196	168	168	174	174	222	222	267	267	244	244	264	264	214	214	228	228	284	284	282	282	282	282	210	210	267	267	210	210	351	351	204	204	296	296	294	294
315	315_3	HOR8825	Hordeum vulgare L. convar. distichon (L.) Alef. var. nutans (Rode) Alef.	2	H		Poland	351	351	195	195	212	212	177	177	174	174	222	222	264	264	244	244	264	264	214	214	228	228	290	290	282	282	282	282	213	213	258	258	210	210	336	336	208	208	296	296	302	302
316	316_1	HOR8828	Hordeum vulgare L. convar. distichon (L.) Alef. var. nutans (Rode) Alef.	2	H		Poland	351	351	195	195	200	200	177	177	174	174	230	230	267	267	246	246	264	264	214	214	228	228	284	284	282	282	282	282	213	213	258	258	210	210	336	336	208	208	296	296	302	302
317	317_1	HOR8831	Hordeum vulgare L. convar. distichon (L.) Alef. var. nutans (Rode) Alef.	2	H		Poland	351	351	195	195	200	200	177	177	174	174	222	222	-99999	-99999	244	244	264	264	214	214	228	228	286	286	282	282	282	282	213	213	258	258	210	210	336	336	208	208	296	296	302	302
318	318_1	HOR8832	Hordeum vulgare L. convar. distichon (L.) Alef. var. nutans (Rode) Alef.	2	H		Poland	351	351	195	195	202	202	177	177	174	174	222	214	264	264	244	244	254	254	214	214	228	228	284	284	282	282	282	282	213	213	258	258	210	210	-99999	-99999	208	208	300	300	302	302
319	319_1	HOR8833	Hordeum vulgare L. convar. distichon (L.) Alef. var. nutans (Rode) Alef.	2	H		Poland	351	351	195	195	212	212	165	165	165	174	222	222	264	264	244	244	264	264	214	214	228	228	290	290	282	282	282	282	213	213	258	258	210	210	336	336	196	196	296	296	302	302
320	320_1	HOR8834	Hordeum vulgare L. convar. distichon (L.) Alef. var. nutans (Rode) Alef.	2	H		Poland	351	351	195	195	202	202	177	177	174	174	222	222	264	264	244	244	254	254	214	214	228	228	284	284	-99999	-99999	282	282	213	213	267	267	210	210	351	351	208	208	300	300	294	294
321	321_1	HOR8835	Hordeum vulgare L. convar. distichon (L.) Alef. var. nutans (Rode) Alef.	2	H		Poland	351	351	195	195	202	202	177	177	174	174	222	222	264	264	246	246	254	254	214	214	228	228	284	284	282	282	282	282	213	213	267	267	210	210	351	351	204	204	300	300	294	294
322	322_1	HOR8836	Hordeum vulgare L. convar. distichon (L.) Alef. var. nutans (Rode) Alef.	2	H		Poland	351	351	195	195	200	200	180	180	174	174	222	222	264	264	244	244	254	254	214	214	228	228	284	284	282	282	282	282	213	213	258	258	210	210	351	351	212	212	295	295	302	302
323	323_2	HOR8839	Hordeum vulgare L. convar. distichon (L.) Alef. var. nutans (Rode) Alef.	2	H		Poland	351	351	195	195	202	202	177	177	174	174	222	222	264	264	246	246	254	254	214	214	228	228	286	286	-99999	-99999	282	282	213	213	267	267	210	210	351	351	204	204	300	300	294	294
324	324_2	HOR8840	Hordeum vulgare L. convar. distichon (L.) Alef. var. nutans (Rode) Alef.	2	H		Poland	351	351	195	195	200	200	180	180	174	174	222	222	264	264	244	244	254	254	214	214	228	228	284	284	282	282	282	282	213	213	258	258	210	210	351	351	212	212	296	296	302	302
325	325_2	HOR8853	Hordeum vulgare L. convar. distichon (L.) Alef. var. nutans (Rode) Alef.	2	H		Poland	351	351	195	195	200	200	177	177	174	174	230	230	267	267	246	246	264	264	214	214	228	228	284	284	282	282	282	282	213	213	258	258	210	210	336	336	208	208	296	296	302	302
326	326_2	HOR8854	Hordeum vulgare L. convar. distichon (L.) Alef. var. nutans (Rode) Alef.	2	H		Poland	351	351	195	195	200	200	180	180	174	174	222	222	264	264	244	244	254	254	214	214	228	228	284	284	282	282	282	282	213	213	258	258	210	210	351	351	212	212	296	296	302	302
327	327_2	HOR10410	Hordeum vulgare L. convar. distichon (L.) Alef. var. nutans (Rode) Alef.	2	H		Poland	351	351	195	195	200	200	174	174	174	174	230	230	264	264	246	246	254	254	212	214	228	228	290	290	282	282	282	282	216	216	267	267	210	210	336	336	200	200	296	296	294	294
328	328_1	HOR10600	Hordeum vulgare L. convar. distichon (L.) Alef. var. nutans (Rode) Alef.	2	H		Poland	351	351	195	195	212	212	180	180	174	174	230	230	267	267	244	244	254	254	214	214	228	228	290	290	282	282	282	282	213	213	267	267	210	210	351	351	204	204	300	300	302	302
329	329_2	HOR10635	Hordeum vulgare L. convar. distichon (L.) Alef. var. medicum Körn.	2	H		Poland	261	261	195	195	200	200	174	174	174	174	230	230	264	264	246	246	254	254	212	212	228	228	286	286	282	282	282	282	216	216	270	270	210	210	351	351	200	208	296	296	304	304
330	330_2	HOR1391	Hordeum vulgare L. convar. distichon (L.) Alef. var. nigricans Sér.	2	H		Romania	351	351	192	192	202	202	174	174	174	174	230	230	264	264	244	244	254	254	214	214	228	228	286	286	282	282	282	282	216	216	258	258	207	207	336	336	204	204	296	296	304	304
331	331_2	BCC1592	Hordeum vulgare L. convar. distichon (L.) Alef. var. nutans (Rode) Alef.	2	H		Romania	351	351	195	195	202	202	183	183	174	174	238	238	264	264	244	244	254	254	214	214	228	228	290	290	274	274	282	282	216	216	258	258	210	210	351	351	208	208	296	296	302	302
333	333_4	HOR9450	Hordeum vulgare L. convar. distichon (L.) Alef. var. nutans (Rode) Alef.	2	H		Romania	351	351	195	195	202	202	177	177	174	174	230	230	264	264	244	244	256	256	214	214	224	224	290	290	274	274	282	282	213	213	267	267	204	204	336	336	208	208	296	296	302	302
334	334_1	HOR9451	Hordeum vulgare L. convar. distichon (L.) Alef. var. nutans (Rode) Alef.	2	H		Romania	351	351	195	195	202	202	177	177	174	174	230	230	264	264	244	244	254	254	212	212	228	228	290	290	282	282	282	282	216	216	258	258	210	210	351	351	208	208	296	296	302	302
335	335_2	HOR9453	Hordeum vulgare L. convar. distichon (L.) Alef. var. nutans (Rode) Alef.	2	H		Romania	351	351	195	195	202	202	183	183	174	174	238	238	264	264	244	244	254	254	214	214	228	228	290	290	282	282	282	282	216	216	258	258	210	210	351	351	212	212	296	296	302	302
336	336_1	HOR215	Hordeum vulgare L. convar. distichon (L.) Alef. var. nutans (Rode) Alef.	2	H		Russia	351	351	195	195	200	200	177	177	174	174	230	230	267	267	244	244	254	254	214	214	228	228	286	286	274	274	278	278	213	213	267	267	210	210	336	336	204	204	300	300	294	294
337	337_2	BCC1481	Hordeum vulgare L. convar. distichon (L.) Alef. var. nutans (Rode) Alef.	2	H		Russia	351	351	195	195	200	200	174	174	174	174	266	266	264	264	244	244	254	254	214	214	228	228	286	286	282	282	282	282	213	213	258	258	210	210	351	351	216	216	300	300	294	294
338	338_2	HOR7334	Hordeum vulgare L. convar. distichon (L.) Alef. var. nutans (Rode) Alef.	2	H		Slovakia	351	351	195	195	200	200	177	177	174	174	230	230	264	264	244	244	254	254	212	212	228	228	286	286	282	282	282	282	213	213	258	258	210	210	336	336	208	208	300	300	302	302
339	339_3	HOR7335	Hordeum vulgare L. convar. distichon (L.) Alef. var. nutans (Rode) Alef.	2	H		Slovakia	351	351	195	195	200	200	177	177	174	174	230	230	264	264	244	244	254	254	212	212	228	228	286	286	282	282	282	282	213	213	258	258	210	210	336	336	208	208	300	300	302	302
340	340_1	HOR7336	Hordeum vulgare L. convar. distichon (L.) Alef. var. nutans (Rode) Alef.	2	H		Slovakia	351	351	195	195	196	196	183	183	174	174	230	230	264	264	244	244	254	254	214	214	224	224	290	290	-99999	-99999	282	282	213	213	258	258	210	210	351	351	208	208	300	300	294	294
341	341_3	HOR7337	Hordeum vulgare L. convar. distichon (L.) Alef. var. nutans (Rode) Alef.	2	H		Slovakia	351	351	195	195	202	202	183	183	174	174	230	230	267	267	244	244	264	264	214	214	228	228	290	290	282	282	282	282	213	213	258	258	210	210	351	351	208	208	296	296	302	302
342	342_1	HOR7338	Hordeum vulgare L. convar. distichon (L.) Alef. var. nutans (Rode) Alef.	2	H		Slovakia	351	351	195	195	202	202	183	183	174	174	238	238	264	264	244	244	254	254	214	214	228	228	290	290	282	282	282	282	216	216	258	258	210	210	351	351	212	212	296	296	302	302
343	343_3	HOR7339	Hordeum vulgare L. convar. distichon (L.) Alef. var. nutans (Rode) Alef.	2	H		Slovakia	351	351	195	195	200	200	177	177	174	174	230	230	264	264	244	244	254	254	212	212	228	228	286	286	282	282	282	282	213	213	258	258	210	210	336	336	208	208	300	300	302	302
344	344_2	HOR7340	Hordeum vulgare L. convar. distichon (L.) Alef. var. nutans (Rode) Alef.	2	H		Slovakia	351	351	195	195	202	202	177	183	174	174	230	230	267	267	244	244	254	254	214	214	228	228	290	290	282	282	282	282	213	213	258	258	210	210	351	351	208	208	296	296	304	304
345	345_2	HOR7341	Hordeum vulgare L. convar. distichon (L.) Alef. var. nutans (Rode) Alef.	2	H		Slovakia	351	351	195	195	200	200	177	177	174	174	230	230	264	264	244	244	254	254	212	212	228	228	286	286	282	282	282	282	213	213	258	258	210	210	336	336	208	208	300	300	302	302
346	346_2	HOR7342	Hordeum vulgare L. convar. distichon (L.) Alef. var. nutans (Rode) Alef.	2	H		Slovakia	351	351	195	195	200	200	177	177	174	174	230	230	264	264	244	244	254	254	212	212	228	228	-99999	-99999	282	282	282	282	213	213	258	258	210	210	336	336	208	208	300	300	302	302
347	347_2	HOR7343	Hordeum vulgare L. convar. distichon (L.) Alef. var. nutans (Rode) Alef.	2	H		Slovakia	351	351	195	195	202	202	183	183	174	174	238	238	264	264	244	244	254	254	214	214	228	228	290	290	-99999	-99999	282	282	216	216	258	258	210	210	351	351	212	212	296	296	304	304
348	348_4	HOR7346	Hordeum vulgare L. convar. distichon (L.) Alef. var. nutans (Rode) Alef.	2	H		Slovakia	351	351	195	195	202	202	183	183	174	174	238	238	264	264	244	244	252	252	214	214	228	228	290	290	282	282	282	282	216	216	258	258	216	216	351	351	212	212	296	296	302	302
349	349_3	HOR7347	Hordeum vulgare L. convar. distichon (L.) Alef. var. nutans (Rode) Alef.	2	H		Slovakia	351	351	195	195	200	200	183	183	174	174	230	230	267	267	244	244	254	254	214	214	228	228	290	290	282	282	282	282	213	213	258	258	210	210	351	351	208	208	296	296	302	302
350	350_2	HOR7348	Hordeum vulgare L. convar. distichon (L.) Alef. var. nutans (Rode) Alef.	2	H		Slovakia	351	351	195	195	202	202	183	183	174	174	238	238	264	264	244	244	254	254	214	214	228	228	290	290	282	282	282	282	216	216	258	258	210	210	351	351	212	212	296	296	302	302
351	351_3	HOR7349	Hordeum vulgare L. convar. distichon (L.) Alef. var. nutans (Rode) Alef.	2	H		Slovakia	351	351	195	195	202	202	183	183	174	174	230	230	267	267	244	244	254	254	214	214	228	228	290	290	282	282	282	282	216	216	258	258	210	210	351	351	208	208	296	296	304	304
352	352_2	HOR7350	Hordeum vulgare L. convar. distichon (L.) Alef. var. nutans (Rode) Alef.	2	H		Slovakia	351	351	195	195	202	202	183	183	174	174	238	238	264	264	244	244	254	254	214	214	228	228	290	290	282	282	282	282	216	216	258	258	210	210	351	351	212	212	296	296	302	302
353	353_1	HOR7351	Hordeum vulgare L. convar. distichon (L.) Alef. var. nutans (Rode) Alef.	2	H		Slovakia	351	351	195	195	202	202	183	183	174	174	238	238	264	264	244	244	254	254	214	214	228	228	290	290	282	282	282	282	216	216	258	258	210	210	351	351	212	212	296	296	302	302
355	355_2	HOR7353	Hordeum vulgare L. convar. distichon (L.) Alef. var. nutans (Rode) Alef.	2	H		Slovakia	351	327	195	195	202	202	183	183	174	174	238	238	264	264	244	244	254	254	214	214	228	228	290	290	282	282	282	282	216	216	258	258	210	210	351	351	200	212	296	296	302	302
356	356_2	HOR7354	Hordeum vulgare L. convar. distichon (L.) Alef. var. nutans (Rode) Alef.	2	H		Slovakia	351	351	195	195	202	202	183	183	174	174	230	230	264	264	244	244	254	254	214	214	228	228	290	290	282	282	282	282	216	216	258	258	210	210	351	351	212	212	296	296	302	302
357	357_3	HOR7355	Hordeum vulgare L. convar. distichon (L.) Alef. var. nutans (Rode) Alef.	2	H		Slovakia	351	351	195	195	202	202	183	183	174	174	238	238	264	264	244	244	254	254	214	214	228	228	290	290	282	282	282	282	216	216	258	258	210	210	351	351	212	212	296	296	302	302
359	359_2	HOR7357	Hordeum vulgare L. convar. distichon (L.) Alef. var. nutans (Rode) Alef.	2	H		Slovakia	351	351	195	195	200	200	177	177	174	174	222	230	264	264	244	244	254	254	212	212	228	228	286	286	282	282	282	282	213	213	258	258	210	210	336	336	208	208	300	300	302	302
360	360_1	HOR7358	Hordeum vulgare L. convar. distichon (L.) Alef. var. nutans (Rode) Alef.	2	H		Slovakia	351	351	195	195	202	202	183	183	174	174	238	238	264	264	244	244	254	254	214	214	228	228	290	290	282	282	282	282	216	216	258	258	210	210	351	351	212	212	296	296	302	302
361	361_2	HOR7359	Hordeum vulgare L. convar. distichon (L.) Alef. var. nutans (Rode) Alef.	2	H		Slovakia	351	351	195	195	202	202	183	183	174	174	238	238	264	264	244	244	254	254	214	214	228	228	290	290	282	282	282	282	216	216	258	258	210	210	351	351	212	212	296	296	302	302
362	362_1	HOR7360	Hordeum vulgare L. convar. distichon (L.) Alef. var. nutans (Rode) Alef.	2	H		Slovakia	351	351	195	195	202	202	183	183	174	174	238	238	264	264	244	244	254	254	214	214	228	228	290	290	282	282	282	282	216	216	258	258	210	210	351	351	212	212	296	296	302	302
363	363_1	HOR7361	Hordeum vulgare L. convar. distichon (L.) Alef. var. nutans (Rode) Alef.	2	H		Slovakia	351	351	195	195	202	202	177	177	174	174	230	230	267	267	244	244	254	254	212	212	228	228	284	284	274	274	282	282	216	216	267	267	207	207	351	351	208	208	296	296	294	294
364	364_3	HOR7362	Hordeum vulgare L. convar. distichon (L.) Alef. var. nutans (Rode) Alef.	2	H		Slovakia	351	351	195	195	200	200	177	177	174	174	230	230	264	264	244	244	254	254	212	212	228	228	290	290	282	282	282	282	216	216	258	258	210	210	351	351	208	208	296	296	302	302
365	365_1	HOR7363	Hordeum vulgare L. convar. distichon (L.) Alef. var. nutans (Rode) Alef.	2	H		Slovakia	351	351	195	195	200	200	177	177	174	174	230	230	264	264	244	244	254	254	212	212	228	228	286	286	282	282	282	282	213	213	258	258	210	210	336	336	208	208	300	300	302	302
366	366_1	HOR7364	Hordeum vulgare L. convar. distichon (L.) Alef. var. nutans (Rode) Alef.	2	H		Slovakia	351	351	195	195	204	204	183	183	168	174	230	230	264	264	244	244	254	254	214	214	228	228	290	290	282	282	282	282	213	213	264	267	210	210	351	351	204	204	296	296	302	302
367	367_2	HOR7365	Hordeum vulgare L. convar. distichon (L.) Alef. var. nutans (Rode) Alef.	2	H		Slovakia	351	351	195	195	200	200	183	183	174	174	230	230	264	264	244	244	254	254	214	214	228	228	290	290	282	282	282	282	213	213	258	258	210	210	351	351	204	204	296	296	302	302
368	368_1	HOR7366	Hordeum vulgare L. convar. distichon (L.) Alef. var. nutans (Rode) Alef.	2	H		Slovakia	351	351	195	195	200	200	177	177	174	174	230	230	264	264	244	244	254	254	212	212	228	228	286	286	282	282	282	282	213	213	258	258	210	210	336	336	208	208	300	300	302	302
369	369_4	HOR7367	Hordeum vulgare L. convar. distichon (L.) Alef. var. nutans (Rode) Alef.	2	H		Slovakia	351	351	195	195	200	200	177	177	174	174	230	230	264	264	244	244	254	254	212	212	228	228	286	286	282	282	282	282	213	213	258	258	210	210	336	336	208	208	300	300	302	302
370	370_3	HOR7368	Hordeum vulgare L. convar. distichon (L.) Alef. var. nutans (Rode) Alef.	2	H		Slovakia	351	351	195	195	202	202	183	183	174	174	230	230	267	267	244	244	254	254	214	214	228	228	-99999	-99999	282	282	282	282	213	213	258	258	210	210	351	351	212	212	296	296	302	302
371	371_1	HOR7369	Hordeum vulgare L. convar. distichon (L.) Alef. var. nutans (Rode) Alef.	2	H		Slovakia	351	351	195	195	202	202	183	183	174	174	230	230	267	267	244	244	264	264	214	214	228	228	290	290	282	282	282	282	213	213	258	258	210	210	351	351	208	212	296	296	302	302
372	372_2	HOR7370	Hordeum vulgare L. convar. distichon (L.) Alef. var. nutans (Rode) Alef.	2	H		Slovakia	351	351	195	195	202	202	183	183	174	174	238	238	264	264	244	244	254	254	214	214	228	228	290	290	282	282	282	282	216	216	258	258	210	210	351	351	212	212	296	296	302	302
373	373_4	HOR7371	Hordeum vulgare L. convar. distichon (L.) Alef. var. erectum (Rode) Alef.	2	H		Slovakia	351	351	195	195	202	202	183	183	174	174	238	238	264	264	244	244	252	252	214	214	228	228	290	290	282	282	282	282	216	216	258	258	210	210	351	351	212	212	296	296	302	302
374	374_2	HOR7372	Hordeum vulgare L. convar. distichon (L.) Alef. var. nutans (Rode) Alef.	2	H		Slovakia	351	351	195	195	200	200	183	183	174	174	230	230	264	264	244	244	254	254	214	214	228	228	290	290	282	282	282	282	213	213	267	267	210	210	351	351	204	204	296	296	302	302
375	375_2	HOR7373	Hordeum vulgare L. convar. distichon (L.) Alef. var. nutans (Rode) Alef.	2	H		Slovakia	351	351	195	195	200	200	177	177	174	174	230	230	264	264	244	244	254	254	212	212	228	228	286	286	276	276	282	282	213	213	258	258	210	210	336	336	208	208	300	300	302	302
376	376_2	HOR7374	Hordeum vulgare L. convar. distichon (L.) Alef. var. nutans (Rode) Alef.	2	H		Slovakia	351	351	195	195	202	202	183	183	174	174	238	238	264	264	244	244	254	254	214	214	228	228	290	290	282	282	282	282	216	216	258	258	210	210	351	351	212	212	296	296	302	302
377	377_1	HOR7376	Hordeum vulgare L. convar. distichon (L.) Alef. var. nutans (Rode) Alef.	2	H		Slovakia	351	351	195	195	202	202	177	177	174	174	222	222	264	264	244	244	254	254	214	214	228	228	284	284	282	282	282	282	213	213	267	267	210	210	351	351	208	208	296	296	294	294
378	378_1	HOR7377	Hordeum vulgare L. convar. distichon (L.) Alef. var. nutans (Rode) Alef.	2	H		Slovakia	351	351	195	195	202	202	180	180	174	174	238	238	264	264	244	244	254	254	214	214	228	228	290	290	282	282	282	282	213	213	258	258	210	210	351	351	204	204	296	296	302	302
379	379_1	HOR7378	Hordeum vulgare L. convar. distichon (L.) Alef. var. nutans (Rode) Alef.	2	H		Slovakia	351	351	195	195	200	200	177	177	174	174	230	230	-99999	-99999	244	244	254	254	212	212	228	228	286	286	282	282	282	282	213	213	258	258	210	210	-99999	-99999	208	208	300	300	302	302
380	380_1	HOR7389	Hordeum vulgare L. convar. distichon (L.) Alef. var. nutans (Rode) Alef.	2	H		Slovakia	351	351	195	195	200	200	183	183	174	174	230	230	-99999	-99999	244	244	254	254	214	214	228	228	290	290	282	282	282	282	213	213	267	267	210	210	-99999	-99999	204	204	296	296	302	302
381	381_2	HOR7390	Hordeum vulgare L. convar. distichon (L.) Alef. var. nutans (Rode) Alef.	2	H		Slovakia	351	351	195	195	202	202	183	183	174	174	238	238	264	264	244	244	254	254	214	214	228	228	290	290	282	282	282	282	213	213	258	258	210	210	351	351	204	204	296	296	302	302
382	382_1	HOR7391	Hordeum vulgare L. convar. distichon (L.) Alef. var. nutans (Rode) Alef.	2	H		Slovakia	351	351	195	195	202	202	183	183	174	174	238	238	264	264	244	244	254	254	214	214	228	228	290	290	282	282	282	282	216	216	258	258	210	210	351	351	212	212	296	296	302	302
383	383_1	HOR7392	Hordeum vulgare L. convar. distichon (L.) Alef. var. nutans (Rode) Alef.	2	H		Slovakia	351	351	195	195	202	202	183	183	174	174	230	230	267	267	244	244	264	264	214	214	228	228	290	290	-99999	-99999	282	282	213	213	258	258	210	210	351	351	208	208	296	296	302	302
384	384_1	HOR7393	Hordeum vulgare L. convar. distichon (L.) Alef. var. nutans (Rode) Alef.	2	H		Slovakia	351	351	195	195	202	202	183	183	174	174	238	238	264	264	244	244	254	254	214	214	228	228	290	290	282	282	282	282	216	216	258	258	210	210	351	351	212	212	296	296	304	304
387	387_2	HOR8615	Hordeum vulgare L. convar. distichon (L.) Alef. var. nutans (Rode) Alef.	2	H		Slovakia	351	351	195	195	200	200	177	177	174	174	230	230	264	264	244	244	254	254	212	212	228	228	290	290	274	274	282	282	213	213	267	267	204	204	336	336	204	204	300	300	302	302
389	389_2	HOR8618	Hordeum vulgare L. convar. distichon (L.) Alef. var. nutans (Rode) Alef.	2	H		Slovakia	351	351	195	195	196	196	183	183	174	174	230	230	264	264	244	244	254	254	214	214	228	228	290	290	-99999	-99999	282	282	213	213	258	258	210	210	351	351	204	204	296	296	302	302
390	390_1	HOR8620	Hordeum vulgare L. convar. distichon (L.) Alef. var. nutans (Rode) Alef.	2	H		Slovakia	351	351	195	195	196	196	183	183	174	174	230	230	264	264	244	244	254	254	214	214	224	224	290	290	282	282	282	282	213	213	258	258	210	210	351	351	204	204	300	300	302	302
394	394_1	HOR8627	Hordeum vulgare L. convar. distichon (L.) Alef. var. nutans (Rode) Alef.	2	H		Slovakia	351	351	195	195	200	200	177	177	174	174	230	230	264	264	244	244	254	254	212	212	228	228	290	290	274	274	282	282	213	213	267	267	207	207	336	336	204	204	300	300	302	302
395	395_2	HOR8629	Hordeum vulgare L. convar. distichon (L.) Alef. var. nutans (Rode) Alef.	2	H		Slovakia	351	351	195	195	202	202	183	183	174	174	238	238	264	264	244	244	254	254	214	214	228	228	290	290	282	282	282	282	216	216	258	258	210	210	351	351	212	212	296	296	302	302
396	396_1	HOR8630	Hordeum vulgare L. convar. distichon (L.) Alef. var. nutans (Rode) Alef.	2	H		Slovakia	351	351	-99999	-99999	202	202	183	183	174	174	230	230	264	264	244	244	254	254	212	212	228	228	290	290	282	282	282	282	213	213	258	258	210	210	351	351	208	208	300	300	302	302
397	397_2	HOR8631	Hordeum vulgare L. convar. distichon (L.) Alef. var. nutans (Rode) Alef.	2	H		Slovakia	351	351	195	195	196	196	183	183	174	174	230	230	264	264	244	244	254	254	214	214	224	224	290	290	282	282	282	282	213	213	258	258	210	210	351	351	204	204	296	296	302	302
398	398_2	HOR8632	Hordeum vulgare L. convar. distichon (L.) Alef. var. nutans (Rode) Alef.	2	H		Slovakia	351	351	195	195	200	200	171	180	174	174	230	230	267	267	244	244	254	254	212	212	228	228	290	290	282	282	282	282	213	213	267	267	210	210	351	351	208	208	296	296	302	302
399	399_1	HOR8633	Hordeum vulgare L. convar. distichon (L.) Alef. var. nutans (Rode) Alef.	2	H		Slovakia	351	351	195	195	202	202	183	183	174	174	238	238	264	264	244	244	254	254	214	214	228	228	-99999	-99999	282	282	282	282	216	216	258	258	210	210	351	351	212	212	296	296	302	302
400	400_1	HOR8634	Hordeum vulgare L. convar. distichon (L.) Alef. var. nutans (Rode) Alef.	2	H		Slovakia	351	351	195	195	202	202	183	183	171	171	238	238	264	264	244	244	254	254	214	214	228	228	290	290	282	282	282	282	216	216	258	258	210	210	351	351	212	212	296	296	302	302
401	401_3	HOR8635	Hordeum vulgare L. convar. distichon (L.) Alef. var. nutans (Rode) Alef.	2	H		Slovakia	351	351	195	195	202	202	177	177	174	174	230	230	264	264	244	244	254	254	212	212	228	228	290	290	282	282	282	282	216	216	258	258	210	210	336	336	208	208	296	296	302	302
402	402_1	HOR8636	Hordeum vulgare L. convar. distichon (L.) Alef. var. nutans (Rode) Alef.	2	H		Slovakia	351	351	195	195	202	202	183	183	174	174	238	238	264	264	244	244	254	254	214	214	228	228	290	290	282	282	282	282	213	213	258	258	210	210	351	351	204	204	296	296	302	302
403	403_2	HOR8637	Hordeum vulgare L. convar. distichon (L.) Alef. var. nutans (Rode) Alef.	2	H		Slovakia	351	351	195	195	200	200	177	177	174	174	230	230	264	264	244	244	254	254	212	212	228	228	286	286	282	282	282	282	213	213	258	258	210	210	336	336	208	208	300	300	302	302
404	404_2	HOR8638	Hordeum vulgare L. convar. distichon (L.) Alef. var. nutans (Rode) Alef.	2	H		Slovakia	351	351	195	195	196	196	183	183	174	174	230	230	-99999	-99999	244	244	254	254	214	214	224	224	290	290	282	282	282	282	213	213	258	258	210	210	-99999	-99999	204	204	300	300	302	302
405	405_2	HOR8639	Hordeum vulgare L. convar. distichon (L.) Alef. var. nutans (Rode) Alef.	2	H		Slovakia	351	351	195	195	200	200	183	183	171	171	-99999	-99999	267	267	244	244	252	252	212	212	228	228	290	290	282	282	282	282	216	216	267	267	210	210	351	351	204	204	296	296	302	302
406	406_1	HOR8640	Hordeum vulgare L. convar. distichon (L.) Alef. var. nutans (Rode) Alef.	2	H		Slovakia	351	351	195	195	202	202	183	183	174	174	230	230	267	267	244	244	254	254	214	214	228	228	290	290	282	282	282	282	213	213	258	258	210	210	351	351	204	204	296	296	302	302
407	407_3	HOR8641	Hordeum vulgare L. convar. distichon (L.) Alef. var. nutans (Rode) Alef.	2	H		Slovakia	351	351	195	195	200	200	183	183	174	174	230	230	267	267	244	244	254	254	212	212	228	228	290	290	282	282	282	282	213	213	267	267	210	210	351	351	204	204	296	296	302	302
408	408_3	HOR8642	Hordeum vulgare L. convar. distichon (L.) Alef. var. nutans (Rode) Alef.	2	H		Slovakia	351	351	195	195	202	202	177	177	174	174	230	230	264	264	244	244	254	254	212	212	228	228	284	284	274	274	282	282	216	216	267	267	207	207	324	324	204	204	296	296	302	302
409	409_1	HOR8643	Hordeum vulgare L. convar. distichon (L.) Alef. var. nutans (Rode) Alef.	2	H		Slovakia	351	351	195	195	196	196	183	183	174	174	230	230	264	264	244	244	254	254	214	214	228	228	290	290	282	282	282	282	213	213	258	258	210	210	351	351	204	204	300	300	302	302
410	410_2	HOR8644	Hordeum vulgare L. convar. distichon (L.) Alef. var. nutans (Rode) Alef.	2	H		Slovakia	351	351	195	195	200	200	177	177	174	174	230	230	264	264	244	244	254	254	212	212	228	228	286	286	282	282	282	282	213	213	258	258	210	210	351	351	204	204	296	296	302	302
411	411_1	HOR8645	Hordeum vulgare L. convar. distichon (L.) Alef. var. nutans (Rode) Alef.	2	H		Slovakia	351	351	195	195	200	200	177	177	174	174	230	230	264	264	244	244	254	254	212	212	228	228	286	286	282	282	282	282	213	213	258	258	210	210	336	336	208	208	300	300	302	302
412	412_1	HOR8646	Hordeum vulgare L. convar. distichon (L.) Alef. var. nutans (Rode) Alef.	2	H		Slovakia	351	351	195	195	202	202	177	177	174	174	230	230	264	264	244	244	254	254	212	212	228	228	290	290	282	282	282	282	216	216	258	258	210	210	336	336	208	208	296	296	302	302
413	413_3	HOR8647	Hordeum vulgare L. convar. distichon (L.) Alef. var. nutans (Rode) Alef.	2	H		Slovakia	351	351	189	195	202	202	-99999	-99999	174	174	238	238	264	264	244	244	254	254	214	214	228	228	290	290	282	282	282	282	207	216	258	258	210	210	351	351	196	204	296	296	302	302
414	414_1	HOR8648	Hordeum vulgare L. convar. distichon (L.) Alef. var. nutans (Rode) Alef.	2	H		Slovakia	351	351	195	195	196	196	183	183	174	174	230	230	284	284	244	244	254	254	214	214	228	228	290	290	282	282	282	282	213	213	258	258	210	210	-99999	-99999	208	208	300	300	294	294
415	415_2	HOR8649	Hordeum vulgare L. convar. distichon (L.) Alef. var. nutans (Rode) Alef.	2	H		Slovakia	351	351	195	195	202	202	183	183	174	174	238	238	264	264	244	244	254	254	214	214	228	228	290	290	282	282	282	282	216	216	258	258	210	210	351	351	212	212	296	296	302	302
416	416_1	HOR8650	Hordeum vulgare L. convar. distichon (L.) Alef. var. nutans (Rode) Alef.	2	H		Slovakia	351	351	186	195	200	200	177	177	174	174	230	230	264	264	244	244	254	254	212	212	228	228	290	290	274	274	282	282	213	213	267	267	207	207	336	336	204	204	300	300	302	302
417	417_1	HOR8651	Hordeum vulgare L. convar. distichon (L.) Alef. var. nutans (Rode) Alef.	2	H		Slovakia	351	351	195	195	202	202	177	177	174	174	230	230	264	264	244	244	254	254	214	214	228	228	-99999	-99999	282	282	282	282	213	213	258	258	210	210	336	336	208	208	300	300	304	304
418	418_1	HOR8652	Hordeum vulgare L. convar. distichon (L.) Alef. var. nutans (Rode) Alef.	2	H		Slovakia	351	351	195	195	200	200	177	177	174	174	230	230	264	264	244	244	254	254	212	212	228	228	286	286	282	282	282	282	213	213	258	258	210	210	336	336	208	208	300	300	302	302
419	419_3	HOR8653	Hordeum vulgare L. convar. distichon (L.) Alef. var. nutans (Rode) Alef.	2	H		Slovakia	351	351	195	195	202	202	183	183	174	174	238	238	264	264	244	244	254	254	214	214	228	228	290	290	282	282	282	282	216	216	258	258	210	210	351	351	212	212	296	296	302	302
420	420_3	HOR8654	Hordeum vulgare L. convar. distichon (L.) Alef. var. nutans (Rode) Alef.	2	H		Slovakia	351	351	195	195	196	196	183	183	174	174	230	230	264	264	244	244	254	254	214	214	224	224	290	290	282	282	282	282	213	213	258	258	210	210	351	351	204	204	296	296	294	294
421	421_1	HOR8655	Hordeum vulgare L. convar. distichon (L.) Alef. var. nutans (Rode) Alef.	2	H		Slovakia	351	327	195	195	200	200	168	168	165	174	222	230	267	267	244	244	254	254	214	214	228	228	290	290	282	282	282	282	216	216	267	267	210	210	351	351	196	196	296	296	302	302
422	422_2	HOR8656	Hordeum vulgare L. convar. distichon (L.) Alef. var. nutans (Rode) Alef.	2	H		Slovakia	351	351	195	195	196	196	183	183	174	174	230	230	252	252	244	244	254	254	214	214	224	224	290	290	282	282	282	282	213	213	258	258	210	210	336	336	204	204	300	300	302	302
423	423_3	HOR8657	Hordeum vulgare L. convar. distichon (L.) Alef. var. nutans (Rode) Alef.	2	H		Slovakia	351	351	195	195	202	202	183	183	174	174	230	230	-99999	-99999	244	244	264	264	214	214	228	228	290	290	282	282	282	282	213	213	258	258	210	210	-99999	-99999	208	208	296	296	302	302
424	424_1	HOR8660	Hordeum vulgare L. convar. distichon (L.) Alef. var. nutans (Rode) Alef.	2	H		Slovakia	351	351	195	195	200	200	180	180	174	174	230	230	267	267	244	244	254	254	212	212	228	228	290	290	282	282	282	282	213	213	267	267	210	210	351	351	208	208	296	296	302	302
425	425_2	HOR8675	Hordeum vulgare L. convar. distichon (L.) Alef. var. nutans (Rode) Alef.	2	H		Slovakia	351	351	195	195	200	200	177	177	174	174	230	230	-99999	-99999	244	244	254	254	212	212	228	228	290	290	274	274	282	282	213	213	267	267	207	207	-99999	-99999	204	204	300	300	302	302
426	426_3	HOR8676	Hordeum vulgare L. convar. distichon (L.) Alef. var. nutans (Rode) Alef.	2	H		Slovakia	351	351	195	195	202	202	183	183	174	174	238	238	284	284	244	244	254	254	214	214	228	228	290	290	282	282	282	282	216	216	258	258	210	210	334	334	212	212	296	296	302	302
427	427_3	HOR8678	Hordeum vulgare L. convar. distichon (L.) Alef. var. nutans (Rode) Alef.	2	H		Slovakia	351	351	195	195	196	196	183	183	174	174	230	230	264	264	244	244	254	254	214	214	228	228	290	290	282	282	282	282	213	213	258	258	210	210	351	351	208	208	296	296	294	294
428	428_1	HOR8679	Hordeum vulgare L. convar. distichon (L.) Alef. var. nutans (Rode) Alef.	2	H		Slovakia	351	351	195	195	202	202	183	183	174	174	238	238	264	264	244	244	254	254	214	214	228	228	292	292	282	282	282	282	216	216	258	258	210	210	351	351	212	212	296	296	302	302
429	429_1	HOR8680	Hordeum vulgare L. convar. distichon (L.) Alef. var. nutans (Rode) Alef.	2	H		Slovakia	351	351	195	195	202	202	183	183	174	174	238	238	264	264	244	244	254	254	214	214	228	228	290	290	282	282	282	282	216	216	258	258	210	210	351	351	212	212	296	296	302	302
430	430_3	HOR8681	Hordeum vulgare L. convar. distichon (L.) Alef. var. nutans (Rode) Alef.	2	H		Slovakia	351	351	195	195	200	200	183	183	174	174	230	230	267	267	244	244	254	254	214	214	228	228	290	290	282	282	282	282	213	213	270	270	210	210	351	351	204	204	296	296	302	302
431	431_2	HOR8682	Hordeum vulgare L. convar. distichon (L.) Alef. var. nutans (Rode) Alef.	2	H		Slovakia	351	351	195	195	202	202	183	183	174	174	238	238	264	264	244	244	254	254	214	214	228	228	290	290	282	282	282	282	216	216	258	258	210	210	351	351	212	212	296	296	302	302
432	432_1	HOR8683	Hordeum vulgare L. convar. distichon (L.) Alef. var. nutans (Rode) Alef.	2	H		Slovakia	351	351	195	195	196	196	183	183	174	174	230	230	264	264	244	244	254	254	214	214	228	228	290	290	282	282	282	282	213	213	258	258	210	210	351	351	208	208	296	296	294	294
433	433_4	HOR9636	Hordeum vulgare L. convar. distichon (L.) Alef. var. nutans (Rode) Alef.	2	H		Slovakia	351	351	195	195	196	196	177	177	174	174	230	230	264	264	244	244	254	254	212	212	228	228	290	290	282	282	282	282	213	213	258	258	210	210	336	336	204	204	300	300	302	302
434	434_2	HOR9637	Hordeum vulgare L. convar. distichon (L.) Alef. var. nutans (Rode) Alef.	2	H		Slovakia	351	351	195	195	196	196	183	183	174	174	230	230	264	264	244	244	254	254	214	214	228	228	290	290	282	282	282	282	213	213	258	258	210	210	351	351	204	204	296	296	302	302
435	435_4	HOR9638	Hordeum vulgare L. convar. distichon (L.) Alef. var. nutans (Rode) Alef.	2	H		Slovakia	351	351	195	195	200	200	183	183	174	174	230	230	264	264	244	244	254	254	212	212	228	228	290	290	274	274	282	282	213	213	258	258	210	210	-99999	-99999	204	204	296	296	302	302
436	436_3	HOR9639	Hordeum vulgare L. convar. distichon (L.) Alef. var. nutans (Rode) Alef.	2	H		Slovakia	351	351	195	195	200	200	177	177	174	174	230	230	264	264	244	244	254	254	212	212	228	228	284	284	274	274	282	282	213	213	267	267	207	207	324	324	208	208	296	296	302	302
437	437_2	HOR9640	Hordeum vulgare L. convar. distichon (L.) Alef. var. nutans (Rode) Alef.	2	H		Slovakia	351	351	195	195	200	200	177	177	165	165	226	226	264	264	244	244	254	254	212	212	228	228	284	284	274	274	282	282	213	213	267	267	207	207	336	336	204	204	296	296	302	302
438	438_2	HOR9641	Hordeum vulgare L. convar. distichon (L.) Alef. var. nutans (Rode) Alef.	2	H		Slovakia	351	351	195	195	196	196	183	183	174	174	230	230	264	264	244	244	254	254	214	214	228	228	290	290	282	282	282	282	213	213	258	258	210	210	342	342	204	204	300	300	302	302
439	439_4	HOR9642	Hordeum vulgare L. convar. distichon (L.) Alef. var. nutans (Rode) Alef.	2	H		Slovakia	351	351	195	195	200	200	177	177	174	174	230	230	264	264	244	244	254	254	212	212	228	228	290	290	282	282	282	282	216	216	273	273	210	210	351	351	204	204	296	296	302	302
440	440_3	HOR9643	Hordeum vulgare L. convar. distichon (L.) Alef. var. nutans (Rode) Alef.	2	H		Slovakia	351	351	195	195	200	200	177	177	174	174	230	230	264	264	244	244	254	254	212	212	228	228	290	290	282	282	282	282	213	213	267	267	210	210	351	351	204	204	296	296	302	302
441	441_3	HOR9644	Hordeum vulgare L. convar. distichon (L.) Alef. var. nutans (Rode) Alef.	2	H		Slovakia	351	351	195	195	200	200	177	177	174	174	230	230	264	264	244	244	254	254	212	212	228	228	286	286	282	282	282	282	213	213	258	258	210	210	336	336	204	204	300	300	302	302
442	442_1	HOR9645	Hordeum vulgare L. convar. distichon (L.) Alef. var. nutans (Rode) Alef.	2	H		Slovakia	351	351	201	201	196	196	177	177	174	174	230	230	264	264	246	246	254	254	214	214	228	228	286	286	282	282	282	282	213	213	258	258	210	210	351	351	204	204	296	296	294	294
443	443_3	HOR9646	Hordeum vulgare L. convar. distichon (L.) Alef. var. nutans (Rode) Alef.	2	H		Slovakia	351	351	195	195	202	202	177	177	174	174	230	230	264	264	244	244	254	254	212	212	228	228	284	284	274	274	282	282	213	213	267	267	210	210	-99999	-99999	204	204	296	296	302	302
444	444_1	HOR9647	Hordeum vulgare L. convar. distichon (L.) Alef. var. nutans (Rode) Alef.	2	H		Slovakia	351	351	195	195	200	200	177	177	174	174	230	230	264	264	244	244	254	254	212	212	228	228	290	290	282	282	282	282	216	216	267	267	210	210	351	351	204	204	296	296	302	302
445	445_3	HOR9648	Hordeum vulgare L. convar. distichon (L.) Alef. var. nutans (Rode) Alef.	2	H		Slovakia	351	351	195	195	200	200	180	180	-99999	-99999	-99999	-99999	-99999	-99999	244	244	254	254	214	214	228	228	290	290	282	282	282	282	213	213	267	267	210	210	-99999	-99999	204	204	296	296	302	302
446	446_2	HOR9651	Hordeum vulgare L. convar. distichon (L.) Alef. var. nutans (Rode) Alef.	2	H		Slovakia	351	351	195	195	202	202	183	183	174	174	226	238	264	264	244	244	254	254	214	214	228	228	290	290	282	282	282	282	216	216	258	258	210	210	351	351	212	212	296	296	302	302
447	447_2	HOR9652	Hordeum vulgare L. convar. distichon (L.) Alef. var. nutans (Rode) Alef.	2	H		Slovakia	351	351	195	195	196	196	174	174	174	174	222	222	264	264	246	246	254	254	214	214	224	224	290	290	282	282	278	278	216	216	267	267	210	210	351	351	204	204	296	296	302	302
448	448_2	HOR9653	Hordeum vulgare L. convar. distichon (L.) Alef. var. nutans (Rode) Alef.	2	H		Slovakia	351	351	195	195	202	202	177	177	174	174	230	230	-99999	-99999	244	244	254	254	212	212	228	228	284	284	274	274	282	282	213	213	267	267	210	210	-99999	-99999	208	208	296	296	302	302
449	449_2	HOR9655	Hordeum vulgare L. convar. distichon (L.) Alef. var. nutans (Rode) Alef.	2	H		Slovakia	351	351	195	195	202	202	168	177	174	174	230	230	267	267	244	244	254	254	212	212	228	228	284	284	274	274	282	282	216	216	267	267	207	207	336	336	208	208	296	296	294	294
450	450_1	HOR9657	Hordeum vulgare L. convar. distichon (L.) Alef. var. nutans (Rode) Alef.	2	H		Slovakia	351	351	195	195	200	200	174	174	174	174	230	230	267	267	244	244	254	254	214	214	228	228	290	290	282	282	282	282	216	216	267	267	210	210	351	351	204	204	296	296	302	302
451	451_3	HOR9658	Hordeum vulgare L. convar. distichon (L.) Alef. var. nutans (Rode) Alef.	2	H		Slovakia	351	351	195	195	196	196	183	183	174	174	230	230	-99999	-99999	244	244	254	254	214	214	224	224	290	290	282	282	282	282	213	213	258	258	210	210	-99999	-99999	204	204	296	296	294	294
452	452_1	HOR9660	Hordeum vulgare L. convar. distichon (L.) Alef. var. nutans (Rode) Alef.	2	H		Slovakia	351	351	195	195	196	196	183	183	174	174	230	230	264	264	244	244	254	254	214	214	228	228	290	290	282	282	282	282	213	213	258	258	210	210	351	351	204	204	296	296	302	302
453	453_2	HOR9661	Hordeum vulgare L. convar. distichon (L.) Alef. var. nutans (Rode) Alef.	2	H		Slovakia	351	351	195	195	202	202	171	177	174	174	222	222	264	264	244	244	254	254	214	214	228	228	284	284	282	282	282	282	213	213	267	267	210	210	351	351	208	208	296	296	294	294
454	454_1	HOR9662	Hordeum vulgare L. convar. distichon (L.) Alef. var. nutans (Rode) Alef.	2	H		Slovakia	351	351	195	195	200	200	177	177	174	174	230	230	264	264	244	244	254	254	212	212	228	228	284	284	274	274	282	282	213	213	267	267	210	210	351	351	204	204	296	296	302	302
455	455_2	HOR9663	Hordeum vulgare L. convar. distichon (L.) Alef. var. nutans (Rode) Alef.	2	H		Slovakia	351	351	195	195	200	200	180	180	165	165	222	222	-99999	-99999	-99999	-99999	254	254	214	214	224	224	290	290	282	282	282	282	216	216	258	258	210	210	-99999	-99999	208	208	296	296	302	302
456	456_1	HOR9665	Hordeum vulgare L. convar. distichon (L.) Alef. var. nutans (Rode) Alef.	2	H		Slovakia	351	351	195	195	200	200	177	177	174	174	230	230	264	264	244	244	254	254	212	212	228	228	286	286	282	282	282	282	213	213	258	258	210	210	336	336	208	208	300	300	302	302
457	457_2	HOR9666	Hordeum vulgare L. convar. distichon (L.) Alef. var. nutans (Rode) Alef.	2	H		Slovakia	351	351	195	195	202	202	177	177	174	174	222	222	264	264	244	244	252	252	214	214	228	228	284	284	282	282	282	282	213	213	267	267	210	210	351	351	208	208	296	296	294	294
458	458_1	HOR9667	Hordeum vulgare L. convar. distichon (L.) Alef. var. nutans (Rode) Alef.	2	H		Slovakia	351	351	195	195	202	202	183	183	174	174	230	230	267	267	244	244	254	254	214	214	228	228	290	290	282	282	282	282	216	216	258	258	210	210	351	351	208	208	296	296	304	304
459	459_1	HOR9668	Hordeum vulgare L. convar. distichon (L.) Alef. var. nutans (Rode) Alef.	2	H		Slovakia	351	351	195	195	196	196	180	180	174	174	230	230	264	264	244	244	254	254	214	214	228	228	290	290	282	282	282	282	213	213	258	258	210	210	336	336	204	204	300	300	294	294
460	460_1	HOR9670	Hordeum vulgare L. convar. distichon (L.) Alef. var. nutans (Rode) Alef.	2	H		Slovakia	351	351	195	195	202	202	162	177	174	174	230	230	-99999	-99999	244	244	254	254	212	212	228	228	284	284	274	274	282	282	213	213	267	267	210	210	-99999	-99999	208	208	296	296	302	302
461	461_2	HOR9671	Hordeum vulgare L. convar. distichon (L.) Alef. var. nutans (Rode) Alef.	2	H		Slovakia	351	351	195	195	200	200	180	180	165	165	222	222	264	264	244	244	254	254	214	214	224	224	290	290	282	282	282	282	216	216	258	258	210	210	351	351	208	208	296	296	302	302
462	462_3	HOR9672	Hordeum vulgare L. convar. distichon (L.) Alef. var. nutans (Rode) Alef.	2	H		Slovakia	351	351	195	195	196	196	183	183	174	174	222	230	264	264	244	244	254	254	214	214	224	224	290	290	282	282	282	282	213	213	258	258	210	210	351	351	204	204	296	296	302	302
463	463_2	HOR9673	Hordeum vulgare L. convar. distichon (L.) Alef. var. nutans (Rode) Alef.	2	H		Slovakia	351	351	195	195	196	196	183	183	174	174	230	230	264	264	244	244	254	254	212	212	228	228	290	290	282	282	282	282	213	213	258	258	210	210	336	336	204	204	300	300	302	302
464	464_1	HOR9674	Hordeum vulgare L. convar. distichon (L.) Alef. var. nutans (Rode) Alef.	2	H		Slovakia	351	351	195	195	200	200	180	180	174	174	230	230	264	264	246	246	264	264	214	214	228	228	284	284	282	282	282	282	213	213	258	258	210	210	336	336	208	208	300	300	302	302
465	465_1	HOR9675	Hordeum vulgare L. convar. distichon (L.) Alef. var. nutans (Rode) Alef.	2	H		Slovakia	351	351	195	195	200	200	177	177	174	174	230	230	264	264	244	244	252	252	212	212	228	228	290	290	274	274	282	282	213	213	267	267	207	207	336	336	204	204	300	300	302	302
466	466_1	HOR9676	Hordeum vulgare L. convar. distichon (L.) Alef. var. nutans (Rode) Alef.	2	H		Slovakia	351	351	195	195	200	200	177	177	174	174	230	230	264	264	244	244	254	254	212	212	228	228	290	290	282	282	282	282	216	216	267	267	210	210	351	351	204	204	296	296	302	302
467	467_1	HOR9677	Hordeum vulgare L. convar. distichon (L.) Alef. var. nutans (Rode) Alef.	2	H		Slovakia	351	351	195	195	200	200	177	177	174	174	230	230	264	264	244	244	254	254	212	212	228	228	290	290	274	274	282	282	213	213	267	267	207	207	336	336	204	204	296	296	302	302
468	468_1	HOR9678	Hordeum vulgare L. convar. distichon (L.) Alef. var. nutans (Rode) Alef.	2	H		Slovakia	351	351	195	195	200	200	177	177	174	174	222	230	261	261	244	244	254	254	212	212	228	228	290	290	282	282	282	282	213	213	267	267	210	210	-99999	-99999	204	204	296	296	302	302
469	469_1	HOR9679	Hordeum vulgare L. convar. distichon (L.) Alef. var. nutans (Rode) Alef.	2	H		Slovakia	351	351	195	195	200	200	168	168	165	165	222	222	264	264	244	244	254	254	214	214	224	224	290	290	282	282	282	282	216	216	258	258	210	210	351	351	208	208	296	296	302	302
470	470_1	HOR9680	Hordeum vulgare L. convar. distichon (L.) Alef. var. nutans (Rode) Alef.	2	H		Slovakia	351	351	195	195	200	200	177	177	174	174	226	230	264	264	244	244	254	254	212	212	228	228	290	290	282	282	282	282	216	216	273	273	210	210	336	336	204	204	296	296	302	302
471	471_3	HOR9681	Hordeum vulgare L. convar. distichon (L.) Alef. var. nutans (Rode) Alef.	2	H		Slovakia	351	351	195	195	200	200	183	183	174	174	230	230	267	267	244	244	254	254	212	212	228	228	290	290	282	282	282	282	216	216	267	267	210	210	351	351	208	208	296	296	302	302
472	472_1	HOR9682	Hordeum vulgare L. convar. distichon (L.) Alef. var. nutans (Rode) Alef.	2	H		Slovakia	351	351	195	195	200	200	177	177	174	174	230	230	264	264	244	244	254	254	212	212	228	228	290	290	282	282	282	282	213	213	267	267	210	210	351	351	204	204	296	296	302	302
473	473_2	HOR9684	Hordeum vulgare L. convar. distichon (L.) Alef. var. nutans (Rode) Alef.	2	H		Slovakia	351	351	195	195	202	202	183	183	174	174	238	238	264	264	244	244	254	254	214	214	228	228	290	290	282	282	282	282	213	213	258	258	210	210	351	351	204	204	296	296	302	302
474	474_2	HOR9685	Hordeum vulgare L. convar. distichon (L.) Alef. var. nutans (Rode) Alef.	2	H		Slovakia	351	351	195	195	202	202	177	177	174	174	230	230	264	264	244	244	254	254	212	212	228	228	284	284	274	274	282	282	213	213	267	267	210	210	351	351	204	204	296	296	302	302
475	475_5	HOR9686	Hordeum vulgare L. convar. distichon (L.) Alef. var. nutans (Rode) Alef.	2	H		Slovakia	351	351	195	195	200	200	177	177	174	174	230	230	264	264	244	244	254	254	212	212	228	228	290	290	282	282	282	282	216	216	267	267	210	210	351	351	204	204	296	296	302	302
476	476_1	HOR9687	Hordeum vulgare L. convar. distichon (L.) Alef. var. nutans (Rode) Alef.	2	H		Slovakia	351	351	195	195	202	202	183	183	174	174	238	238	264	264	244	244	254	254	214	214	228	228	290	290	282	282	282	282	216	216	258	258	210	210	351	351	212	212	296	296	302	302
477	477_2	HOR9688	Hordeum vulgare L. convar. distichon (L.) Alef. var. nutans (Rode) Alef.	2	H		Slovakia	351	351	195	195	200	200	177	177	174	174	230	230	261	261	244	244	254	254	212	212	228	228	284	284	282	282	282	282	213	213	267	267	210	210	-99999	-99999	204	204	296	296	302	302
478	478_1	HOR9689	Hordeum vulgare L. convar. distichon (L.) Alef. var. nutans (Rode) Alef.	2	H		Slovakia	351	351	195	195	200	200	180	180	174	174	230	230	-99999	-99999	244	244	254	254	214	214	228	228	290	290	282	282	282	282	213	213	267	267	210	210	337	337	204	204	296	296	302	302
479	479_1	HOR9691	Hordeum vulgare L. convar. distichon (L.) Alef. var. nutans (Rode) Alef.	2	H		Slovakia	351	351	195	195	200	200	183	183	174	174	230	230	261	261	244	244	254	254	212	212	228	228	290	290	282	282	282	282	216	216	267	267	210	210	334	334	208	208	296	296	302	302
480	480_1	HOR9692	Hordeum vulgare L. convar. distichon (L.) Alef. var. nutans (Rode) Alef.	2	H		Slovakia	351	351	195	195	200	200	177	177	174	174	230	230	-99999	-99999	244	244	254	254	212	212	228	228	290	290	282	282	282	282	213	213	267	267	210	210	-99999	-99999	204	204	296	296	302	302
481	481_1	HOR9693	Hordeum vulgare L. convar. distichon (L.) Alef. var. nutans (Rode) Alef.	2	H		Slovakia	351	351	195	195	200	200	177	177	174	174	238	238	264	264	244	244	254	254	212	212	228	228	286	286	282	282	282	282	216	216	267	267	210	210	351	351	208	208	296	296	304	304
482	482_2	HOR9694	Hordeum vulgare L. convar. distichon (L.) Alef. var. nutans (Rode) Alef.	2	H		Slovakia	351	351	195	195	196	196	183	183	174	174	230	230	264	264	244	244	254	254	214	214	224	224	290	290	282	282	282	282	213	213	258	258	210	210	-99999	-99999	204	204	300	300	302	302
483	483_2	HOR9695	Hordeum vulgare L. convar. distichon (L.) Alef. var. nutans (Rode) Alef.	2	H		Slovakia	351	351	195	195	200	200	177	177	174	174	230	230	-99999	-99999	244	244	254	254	212	212	228	228	286	286	282	282	282	282	213	213	258	258	210	210	-99999	-99999	208	208	300	300	302	302
484	484_1	HOR9696	Hordeum vulgare L. convar. distichon (L.) Alef. var. nutans (Rode) Alef.	2	H		Slovakia	351	351	195	195	200	200	177	177	174	174	230	230	264	264	244	244	254	254	212	212	228	228	286	286	282	282	282	282	213	213	258	258	210	210	336	336	208	208	300	300	302	302
485	485_4	HOR9697	Hordeum vulgare L. convar. distichon (L.) Alef. var. nutans (Rode) Alef.	2	H		Slovakia	351	351	195	195	202	202	174	183	174	174	230	230	267	267	244	244	264	264	214	214	228	228	290	290	282	282	282	282	213	213	258	258	210	210	351	351	208	208	296	296	302	302
486	486_3	HOR9698	Hordeum vulgare L. convar. distichon (L.) Alef. var. nutans (Rode) Alef.	2	H		Slovakia	351	351	195	195	196	196	168	168	174	174	230	230	264	264	244	244	254	254	214	214	224	224	290	290	282	282	282	282	213	213	258	258	210	210	-99999	-99999	208	208	300	300	302	302
487	487_4	HOR9699	Hordeum vulgare L. convar. distichon (L.) Alef. var. nutans (Rode) Alef.	2	H		Slovakia	351	351	195	195	200	200	177	177	174	174	230	230	264	264	244	244	264	264	212	212	228	228	286	286	282	282	282	282	213	213	258	258	210	210	336	336	208	208	300	300	302	302
488	488_2	HOR9700	Hordeum vulgare L. convar. distichon (L.) Alef. var. nutans (Rode) Alef.	2	H		Slovakia	351	351	195	195	202	202	183	183	174	174	238	238	264	264	244	244	254	254	214	214	228	228	290	290	282	282	282	282	216	216	258	258	210	210	351	351	212	212	296	296	302	302
489	489_4	HOR1732	Hordeum vulgare L. convar. distichon (L.) Alef. var. erectum (Rode) Alef.	2	H		Sweden	351	351	201	201	196	196	174	174	174	174	230	230	264	264	244	244	264	264	212	212	224	224	286	286	282	282	278	278	210	210	267	267	207	207	351	351	208	208	296	296	294	294
490	490_3	HOR14083	Hordeum vulgare L. convar. distichon (L.) Alef. var. nutans (Rode) Alef.	2	H		Sweden	351	351	195	195	202	202	177	177	174	174	222	222	264	264	244	244	254	254	214	214	228	228	284	284	282	282	282	282	213	213	258	258	210	210	351	351	216	216	300	300	302	302
491	491_2	HOR11294	Hordeum vulgare L. convar. distichon (L.) Alef. var. nutans (Rode) Alef.	2	H		Switzerland	351	351	195	195	212	212	177	177	174	174	222	222	264	264	244	244	264	264	214	214	228	228	290	290	282	282	282	282	219	219	258	258	210	210	336	336	208	208	296	296	302	302
492	492_2	HOR12154	Hordeum vulgare L. convar. distichon (L.) Alef. var. nutans (Rode) Alef.	2	H		Switzerland	351	351	195	195	200	200	174	174	174	174	230	230	264	264	244	244	264	264	212	212	224	224	284	284	282	282	282	282	213	213	267	267	210	210	351	351	208	208	296	296	302	302
493	493_3	HOR12166	Hordeum vulgare L. convar. distichon (L.) Alef. var. nutans (Rode) Alef.	2	H		Switzerland	351	351	195	195	200	200	174	174	174	174	230	230	264	264	244	244	254	254	212	212	224	224	284	284	282	282	278	278	213	213	267	267	210	210	351	351	208	208	296	296	294	294
494	494_2	HOR12172	Hordeum vulgare L. convar. distichon (L.) Alef. var. nutans (Rode) Alef.	2	H		Switzerland	351	351	195	195	200	200	174	174	174	174	222	222	-99999	-99999	244	244	254	254	212	212	224	224	284	284	282	282	282	282	213	213	258	258	210	210	-99999	-99999	208	208	296	296	302	302
495	495_4	HOR12174	Hordeum vulgare L. convar. distichon (L.) Alef. var. nutans (Rode) Alef.	2	H		Switzerland	351	351	195	195	210	210	183	183	174	174	230	230	264	264	244	244	254	254	212	212	224	224	284	284	282	282	282	282	216	216	258	258	210	210	351	351	208	208	296	296	304	304
496	496_2	HOR12200	Hordeum vulgare L. convar. distichon (L.) Alef. var. nutans (Rode) Alef.	2	H		Switzerland	351	351	195	195	200	200	174	174	174	174	230	230	264	264	244	244	254	254	212	212	224	224	284	284	282	282	278	278	213	213	267	267	210	210	351	351	208	208	296	296	294	294
497	497_4	HOR12206	Hordeum vulgare L. convar. distichon (L.) Alef. var. nutans (Rode) Alef.	2	H		Switzerland	351	351	195	195	202	202	183	183	174	174	230	230	264	264	244	244	254	254	212	212	228	228	290	290	282	282	282	282	216	216	258	258	210	210	351	351	208	208	296	296	302	302
498	498_2	HOR12199	Hordeum vulgare L. convar. distichon (L.) Alef.	2	H		Switzerland	351	351	195	195	200	200	183	183	174	174	230	230	264	264	244	244	256	256	212	212	224	224	284	284	282	282	278	278	210	210	267	267	210	210	-99999	-99999	208	208	296	296	294	294
499	499_3	HOR4469	Hordeum vulgare L. convar. distichon (L.) Alef. var. nutans (Rode) Alef.	2	H		Syria	351	351	195	195	206	206	174	174	174	174	262	262	264	264	246	246	264	264	214	214	224	224	286	286	274	274	282	282	219	219	267	267	207	207	351	351	208	208	296	296	302	302
500	500_1	HOR7400	Hordeum vulgare L. convar. distichon (L.) Alef. var. dubium (Körn.) Mansf.	2	H		Syria	351	351	201	201	218	218	174	174	174	174	254	254	267	267	246	246	266	266	214	214	224	224	286	286	274	274	282	282	213	213	258	258	210	210	351	351	204	204	296	296	302	302
501	501_2	HOR12826	Hordeum vulgare L. convar. distichon (L.) Alef. var. nigricans Sér.	2	H		Syria	351	351	195	195	202	202	174	174	174	174	202	202	267	267	246	246	254	254	214	214	228	228	292	292	276	276	282	282	213	213	261	261	210	210	336	345	208	208	296	296	302	302
502	502_1	HOR12827	Hordeum vulgare L. convar. distichon (L.) Alef. var. dubium (Körn.) Mansf.	2	H		Syria	351	351	201	201	218	218	174	174	174	174	254	254	267	267	246	246	256	256	214	214	224	224	286	286	274	274	276	276	213	213	258	258	210	210	-99999	-99999	204	204	296	296	302	302
503	503_4	HOR12829	Hordeum vulgare L. convar. distichon (L.) Alef. var. persicum Körn.	2	H		Syria	351	351	195	195	202	202	174	174	174	174	202	202	267	267	246	246	254	254	214	214	228	228	290	290	276	276	282	282	213	213	261	261	210	210	336	345	208	208	296	296	302	302
504	504_2	HOR10986	Hordeum vulgare L. convar. distichon (L.) Alef. var. nutans (Rode) Alef.	2	H		Tunisia	351	351	201	201	202	202	174	174	165	165	250	250	264	264	246	246	266	266	214	214	224	224	286	286	274	274	278	278	216	216	267	267	207	207	351	351	208	208	300	300	302	302
505	505_3	HOR411	Hordeum vulgare L. convar. distichon (L.) Alef. var. nutans (Rode) Alef.	2	H		Turkey	351	351	195	195	206	206	165	165	174	174	230	230	264	264	244	244	254	254	212	212	224	224	290	290	282	282	282	282	213	213	270	270	210	210	351	351	212	212	296	296	302	302
506	506_3	HOR412	Hordeum vulgare L. convar. distichon (L.) Alef. var. nutans (Rode) Alef.	2	H		Turkey	351	351	195	195	206	206	180	180	174	174	230	230	264	264	244	244	264	264	212	212	224	224	290	290	274	274	282	282	213	213	264	264	207	207	351	351	216	216	296	296	302	302
507	507_4	HOR441	Hordeum vulgare L. convar. distichon (L.) Alef. var. nutans (Rode) Alef.	2	H		Turkey	351	351	195	195	202	202	174	174	174	174	230	230	264	264	244	244	254	254	212	212	224	224	290	290	282	282	278	278	213	213	258	258	207	207	351	351	200	200	296	296	304	304
508	508_2	HOR502	Hordeum vulgare L. convar. distichon (L.) Alef. var. nutans (Rode) Alef.	2	H		Turkey	351	351	195	195	206	206	174	174	162	162	194	226	264	264	244	244	254	264	212	212	224	224	290	290	274	274	280	280	213	213	267	267	207	207	336	351	200	200	296	296	302	302
509	509_4	HOR508	Hordeum vulgare L. convar. distichon (L.) Alef. var. nutans (Rode) Alef.	2	H		Turkey	351	351	195	195	202	202	180	180	174	174	234	234	264	264	244	244	254	254	212	212	224	224	290	290	274	274	280	280	213	213	264	264	210	210	351	351	204	204	296	296	302	302
510	510_1	HOR509	Hordeum vulgare L. convar. distichon (L.) Alef. var. nutans (Rode) Alef.	2	H		Turkey	351	351	195	195	202	202	180	180	174	174	222	222	264	264	244	244	254	254	212	212	224	224	290	290	274	274	280	280	213	213	264	264	207	207	351	351	200	200	296	296	304	304
511	511_2	HOR526	Hordeum vulgare L. convar. distichon (L.) Alef. var. nutans (Rode) Alef.	2	H		Turkey	351	351	186	195	206	206	165	165	174	174	230	230	267	267	246	246	254	254	214	214	224	224	290	290	282	282	280	280	210	210	267	267	210	210	336	336	212	212	288	288	302	302
512	512_1	HOR527	Hordeum vulgare L. convar. distichon (L.) Alef. var. nutans (Rode) Alef.	2	H		Turkey	351	351	198	198	206	206	180	180	174	174	230	230	267	267	246	246	266	266	214	214	224	224	290	290	282	282	280	280	213	213	267	267	207	207	336	336	212	212	288	288	302	302
513	513_3	HOR552	Hordeum vulgare L. convar. distichon (L.) Alef. var. nutans (Rode) Alef.	2	H		Turkey	351	351	195	195	196	196	171	180	174	174	226	226	264	264	244	244	264	264	214	214	224	224	290	290	274	274	280	280	213	213	267	267	210	210	351	351	200	220	296	296	302	302
514	514_1	HOR572	Hordeum vulgare L. convar. distichon (L.) Alef. var. nutans (Rode) Alef.	2	H		Turkey	351	351	201	201	212	212	177	177	174	174	222	222	264	264	244	244	254	254	212	212	224	224	290	290	282	282	276	276	213	213	264	264	210	210	351	351	208	208	296	296	302	302
515	515_2	HOR573	Hordeum vulgare L. convar. distichon (L.) Alef. var. nutans (Rode) Alef.	2	H		Turkey	351	351	201	201	206	206	177	177	174	174	222	222	264	264	244	244	254	254	212	212	224	224	290	290	282	282	276	276	213	213	264	264	210	210	351	351	208	208	296	296	302	302
516	516_1	HOR610	Hordeum vulgare L. convar. distichon (L.) Alef. var. nutans (Rode) Alef.	2	H		Turkey	351	351	201	201	196	212	162	162	174	174	202	202	267	267	244	244	254	254	214	214	224	224	290	290	274	274	280	280	213	213	264	264	207	207	351	351	200	200	296	296	302	302
517	517_2	HOR634	Hordeum vulgare L. convar. distichon (L.) Alef. var. nutans (Rode) Alef.	2	H		Turkey	351	351	210	210	212	212	174	174	174	174	230	230	264	264	244	244	264	264	214	214	224	224	290	290	274	274	276	276	213	213	267	267	210	210	351	351	208	208	296	296	294	294
518	518_1	HOR655	Hordeum vulgare L. convar. distichon (L.) Alef. var. nutans (Rode) Alef.	2	H		Turkey	351	351	195	195	202	202	174	174	174	174	234	234	267	267	246	246	256	256	214	214	224	224	290	290	282	282	280	280	213	213	267	267	210	210	336	336	208	208	296	296	302	302
519	519_2	HOR656	Hordeum vulgare L. convar. distichon (L.) Alef. var. nutans (Rode) Alef.	2	H		Turkey	351	351	195	195	200	200	180	180	174	174	222	222	264	264	244	244	254	254	212	212	224	224	290	290	282	282	280	280	213	213	264	264	207	207	351	351	208	208	296	296	302	302
520	520_1	HOR658	Hordeum vulgare L. convar. distichon (L.) Alef. var. nutans (Rode) Alef.	2	H		Turkey	351	351	195	195	202	202	177	177	174	174	230	230	267	267	244	244	254	254	212	212	224	224	290	290	282	282	276	276	213	213	270	270	210	210	351	351	208	208	296	296	302	302
521	521_3	HOR902	Hordeum vulgare L. convar. distichon (L.) Alef. var. nutans (Rode) Alef.	2	H		Turkey	351	351	195	195	206	206	177	177	174	174	230	230	264	264	246	246	266	266	214	214	224	224	290	290	282	282	280	280	213	213	264	264	210	210	351	351	208	208	296	296	302	302
522	522_1	HOR1178	Hordeum vulgare L. convar. distichon (L.) Alef. var. erectum (Rode) Alef.	2	H		Turkey	351	351	195	195	202	202	177	177	174	174	222	222	264	264	244	244	254	254	214	214	228	228	284	284	282	282	280	280	213	213	258	258	210	210	351	351	216	216	300	300	302	302
523	523_3	HOR1195	Hordeum vulgare L. convar. distichon (L.) Alef. var. nigrescens Körn.	2	H		Turkey	351	351	195	195	206	206	174	174	174	174	230	230	267	267	246	246	266	266	214	214	224	224	290	290	282	282	280	280	213	213	267	267	210	210	351	351	212	212	288	288	302	302
524	524_1	HOR1207	Hordeum vulgare L. convar. distichon (L.) Alef. var. nigrescens Körn.	2	H		Turkey	351	351	195	195	204	204	177	177	174	174	230	230	267	267	246	246	266	266	214	214	224	224	292	292	282	282	280	280	213	213	267	267	210	210	336	336	212	212	288	288	302	302
526	526_1	HOR1260	Hordeum vulgare L. convar. distichon (L.) Alef. var. nigrescens Körn.	2	H		Turkey	351	351	195	195	206	206	174	174	174	174	230	230	267	267	244	244	254	254	214	214	224	224	290	290	274	274	280	280	213	213	267	267	213	213	351	351	200	200	288	288	302	302
527	527_3	HOR1408	Hordeum vulgare L. convar. distichon (L.) Alef. var. nutans (Rode) Alef.	2	H		Turkey	351	351	195	195	210	210	177	177	174	174	230	230	264	264	246	246	264	264	214	214	224	224	290	290	282	282	280	280	213	213	264	264	207	207	351	351	208	208	296	296	302	302
528	528_3	HOR1415	Hordeum vulgare L. convar. distichon (L.) Alef. var. nutans (Rode) Alef.	2	H		Turkey	351	351	195	195	210	210	174	174	174	174	262	262	264	264	244	244	254	254	214	214	230	230	290	290	282	282	280	280	213	213	270	270	210	210	351	351	204	204	296	296	302	302
529	529_1	HOR1740	Hordeum vulgare L. convar. distichon (L.) Alef. var. nigrescens Körn.	2	H		Turkey	351	351	195	195	202	202	180	180	174	174	230	230	267	267	246	246	256	256	214	214	224	224	290	290	282	282	280	280	210	210	264	264	210	210	351	351	208	208	296	296	302	302
531	531_3	HOR1973	Hordeum vulgare L. convar. distichon (L.) Alef. var. medicum Körn.	2	H		Turkey	351	351	195	195	206	206	180	180	174	174	230	230	267	267	246	246	254	254	214	214	224	224	290	290	282	282	280	280	213	213	267	267	210	210	336	336	212	212	288	288	302	302
532	532_1	HOR2388	Hordeum vulgare L. convar. distichon (L.) Alef. var. medicum Körn.	2	H		Turkey	351	351	195	195	204	204	180	180	174	174	234	234	264	264	244	244	254	254	212	212	224	224	290	290	274	274	280	280	213	213	264	264	210	210	351	351	204	204	296	296	302	302
533	533_2	HOR2431	Hordeum vulgare L. convar. distichon (L.) Alef. var. nigrescens Körn.	2	H		Turkey	351	351	195	195	202	202	174	174	174	174	234	234	264	264	246	246	254	254	214	214	224	224	284	284	282	282	276	276	213	213	264	264	207	207	351	351	212	212	296	296	302	302
534	534_2	HOR4078	Hordeum vulgare L. convar. distichon (L.) Alef. var. medicum Körn.	2	H		Turkey	261	261	195	195	206	206	-99999	-99999	174	174	230	230	267	267	246	246	254	254	214	214	224	224	284	284	282	282	280	280	216	216	258	258	210	210	351	351	212	212	288	288	302	302
535	535_1	HOR4093	Hordeum vulgare L. convar. distichon (L.) Alef. var. nigrescens Körn.	2	H		Turkey	351	351	195	195	206	206	174	174	174	174	230	230	267	267	246	246	254	254	214	214	224	224	284	284	274	274	280	280	216	216	258	258	210	210	351	351	212	212	296	296	302	302
536	536_1	HOR4471	Hordeum vulgare L. convar. distichon (L.) Alef. var. nutans (Rode) Alef.	2	H		Turkey	351	351	195	195	196	196	180	180	174	174	226	226	264	264	244	244	254	254	212	212	224	224	290	290	282	282	280	280	213	213	264	264	210	210	351	351	208	208	296	296	302	302
537	537_2	HOR7962	Hordeum vulgare L. convar. distichon (L.) Alef. var. nutans (Rode) Alef.	2	H		Turkey	351	351	195	195	202	202	174	174	174	174	230	230	264	264	246	246	254	254	214	214	224	224	292	292	282	282	280	280	210	210	267	267	207	207	351	351	208	208	296	296	302	302
538	538_4	HOR7964	Hordeum vulgare L. convar. distichon (L.) Alef. var. medicum Körn.	2	H		Turkey	351	351	201	201	206	206	174	174	174	174	202	202	264	264	244	244	254	254	214	214	224	224	290	290	274	274	280	280	213	213	264	264	210	210	351	351	216	216	296	296	302	302
539	539_1	HOR7966	Hordeum vulgare L. convar. distichon (L.) Alef. var. nutans (Rode) Alef.	2	H		Turkey	351	351	195	195	202	202	174	174	174	174	230	230	264	264	246	246	254	254	214	214	224	224	292	292	282	282	280	280	210	210	267	267	207	207	351	351	208	208	296	296	302	302
540	540_1	HOR7968	Hordeum vulgare L. convar. distichon (L.) Alef. var. nigrescens Körn.	2	H		Turkey	351	351	195	195	206	206	180	180	174	174	230	230	264	264	246	246	266	266	214	214	224	224	292	292	282	282	280	280	210	210	264	264	207	207	351	351	200	200	296	296	302	302
541	541_1	HOR7969	Hordeum vulgare L. convar. distichon (L.) Alef. var. nutans (Rode) Alef.	2	H		Turkey	351	351	195	195	202	202	174	174	174	174	230	230	264	264	246	246	266	266	214	214	224	224	292	292	282	282	280	280	210	210	264	264	207	207	351	351	208	208	296	296	302	302
542	542_2	HOR7970	Hordeum vulgare L. convar. distichon (L.) Alef. var. nutans (Rode) Alef.	2	H		Turkey	351	351	195	195	202	202	174	174	174	174	230	230	264	264	246	246	254	254	214	214	224	224	292	292	-99999	-99999	280	280	210	210	267	267	207	207	351	351	208	208	296	296	302	302
543	543_1	HOR7977	Hordeum vulgare L. convar. distichon (L.) Alef. var. nutans (Rode) Alef.	2	H		Turkey	351	351	195	195	202	202	168	177	174	174	222	222	264	264	244	244	254	254	212	212	224	224	292	292	282	282	276	276	213	213	270	270	210	210	351	351	200	200	296	296	302	302
544	544_1	HOR7978	Hordeum vulgare L. convar. distichon (L.) Alef. var. nutans (Rode) Alef.	2	H		Turkey	351	351	195	195	200	206	180	180	174	174	230	230	264	264	246	246	254	254	212	212	228	228	290	290	282	282	280	280	213	213	264	264	210	210	351	351	200	200	296	296	302	302
545	545_3	HOR7985	Hordeum vulgare L. convar. distichon (L.) Alef. var. medicum Körn.	2	H		Turkey	351	351	195	195	206	206	180	180	174	174	234	234	264	264	244	244	264	264	212	212	228	228	290	290	274	274	280	280	213	213	264	264	210	210	351	351	200	200	296	296	302	302
546	546_2	HOR8006	Hordeum vulgare L. convar. distichon (L.) Alef. var. medicum Körn.	2	H		Turkey	351	351	195	195	204	204	180	180	174	174	234	234	-99999	-99999	244	244	264	264	212	212	228	228	290	290	274	274	280	280	213	213	264	264	210	210	-99999	-99999	200	200	296	296	302	302
547	547_3	HOR8011	Hordeum vulgare L. convar. distichon (L.) Alef. var. nutans (Rode) Alef.	2	H		Turkey	351	351	195	195	206	206	180	180	174	174	226	226	264	264	244	244	264	264	212	212	224	224	290	290	274	274	280	280	213	213	264	264	207	207	351	351	204	204	296	296	302	302
548	548_2	HOR8050	Hordeum vulgare L. convar. distichon (L.) Alef. var. nutans (Rode) Alef.	2	H		Turkey	351	351	195	195	206	206	180	180	174	174	230	230	264	264	244	244	254	254	212	212	224	224	290	290	282	282	280	280	213	213	270	270	210	210	351	351	212	212	296	296	302	302
549	549_3	HOR8099	Hordeum vulgare L. convar. distichon (L.) Alef. var. nutans (Rode) Alef.	2	H		Turkey	351	351	195	195	202	202	174	174	174	174	230	230	264	264	246	246	254	254	214	214	224	224	292	292	-99999	-99999	280	280	210	210	267	267	207	207	351	351	208	208	296	296	302	302
550	550_1	HOR8110	Hordeum vulgare L. convar. distichon (L.) Alef. var. nigrescens Körn.	2	H		Turkey	351	351	195	195	206	206	180	180	174	174	230	230	264	264	246	246	266	266	214	214	224	224	292	292	282	282	280	280	210	210	264	264	207	207	351	351	200	200	296	296	302	302
551	551_1	HOR8113	Hordeum vulgare L. convar. distichon (L.) Alef. var. nutans (Rode) Alef.	2	H		Turkey	351	351	195	195	202	202	174	174	174	174	230	230	264	264	246	246	254	254	214	214	224	224	292	292	282	282	280	280	-99999	-99999	267	267	207	207	351	351	208	208	296	296	302	302
552	552_2	HOR8158	Hordeum vulgare L. convar. distichon (L.) Alef. var. medicum Körn.	2	H		Turkey	351	351	195	195	204	204	165	165	174	174	234	234	264	264	244	244	264	264	212	212	228	228	290	290	-99999	-99999	280	280	213	213	264	264	210	210	351	351	200	200	296	296	302	302
553	553_2	HOR8160	Hordeum vulgare L. convar. distichon (L.) Alef. var. nutans (Rode) Alef.	2	H		Turkey	351	351	195	195	192	206	174	174	174	174	222	222	264	264	244	244	254	254	212	212	224	224	292	292	282	282	282	282	213	213	264	264	210	210	351	351	200	200	296	296	302	302
554	554_1	HOR10567	Hordeum vulgare L. convar. distichon (L.) Alef. var. nutans (Rode) Alef.	2	H		Turkey	351	351	195	195	206	206	180	180	174	174	222	222	264	264	244	244	254	254	212	212	224	224	290	290	282	282	280	280	213	213	264	264	210	210	351	351	208	208	296	296	302	302
555	555_2	HOR203	Hordeum vulgare L. convar. distichon (L.) Alef. var. nutans (Rode) Alef.	2	H		Ukraine	351	351	195	195	202	202	177	177	174	174	230	230	264	264	246	246	264	264	214	214	230	230	286	286	282	282	280	280	213	213	267	267	210	210	351	351	208	208	296	296	302	302
556	556_3	HOR205	Hordeum vulgare L. convar. distichon (L.) Alef. var. nutans (Rode) Alef.	2	H		Ukraine	351	351	195	195	202	202	183	183	174	174	230	230	264	264	244	244	254	254	214	214	224	224	286	286	-99999	-99999	280	280	213	213	258	258	207	207	351	351	204	204	296	296	302	302
557	557_2	HOR757	Hordeum vulgare L. convar. distichon (L.) Alef. var. nutans (Rode) Alef.	2	H		Yugoslavia	351	351	195	195	200	200	168	180	174	174	230	230	264	264	244	244	254	254	214	214	230	230	286	286	282	282	280	280	213	213	267	267	210	210	336	336	204	204	300	300	302	302
558	558_1	BCC1434	Hordeum vulgare L. convar. distichon (L.) Alef. var. nutans (Rode) Alef.	2	H		Yugoslavia	351	351	195	195	200	200	180	180	174	174	230	230	264	264	244	244	254	254	214	214	230	230	286	286	282	282	282	282	213	213	267	267	210	210	336	336	204	204	300	300	302	302
559	559_4	HOR4016	Hordeum vulgare L. convar. distichon (L.) Alef. var. nutans (Rode) Alef.	2	H		Yugoslavia	351	351	195	195	200	200	183	183	174	174	238	238	264	264	244	244	254	254	214	214	230	230	290	290	282	282	280	280	216	216	258	258	210	210	351	351	208	208	296	296	302	302
560	560_3	HOR4017	Hordeum vulgare L. convar. distichon (L.) Alef. var. nutans (Rode) Alef.	2	H		Yugoslavia	351	351	195	195	196	196	177	177	174	174	230	230	267	267	244	244	264	264	214	214	230	230	290	290	282	282	282	282	213	213	267	267	210	210	351	351	204	204	296	296	294	294
561	561_3	BCC1	Hordeum vulgare L. convar. vulgare var. hybernum Viborg	6	H		Afghanistan	351	351	201	201	200	208	174	174	165	165	242	242	264	264	244	244	256	256	214	214	224	224	290	290	274	274	274	274	216	216	267	267	213	213	336	336	208	208	300	300	304	304
562	562_1	BCC7	Hordeum vulgare L. convar. vulgare var. hybernum Viborg	6	H		Afghanistan	351	351	195	195	200	200	177	177	174	174	202	202	267	267	246	246	266	266	214	214	224	224	290	290	274	274	276	276	213	213	273	273	207	207	324	324	208	208	292	292	300	300
563	563_3	HOR1481	Hordeum vulgare L. convar. vulgare var. parallelum Körn.	6	H		Afghanistan	351	351	195	195	200	200	177	177	168	168	202	202	258	258	244	244	266	266	214	214	230	230	286	286	276	276	276	276	213	213	264	264	210	210	324	324	204	204	296	296	300	300
564	564_1	HOR1509	Hordeum vulgare L. convar. vulgare var. hybernum Viborg	6	H		Afghanistan	261	261	204	204	212	212	168	168	165	165	262	262	258	258	244	244	254	254	210	210	224	224	286	286	276	276	278	278	213	213	258	258	210	210	324	324	200	200	296	296	294	294
565	565_3	HOR1519	Hordeum vulgare L. convar. vulgare var. rikotense Regel	6	H		Afghanistan	351	351	195	195	212	212	177	177	165	165	202	202	264	264	244	244	276	276	214	214	224	224	286	286	274	274	276	276	213	213	264	264	210	210	351	351	200	200	296	296	304	304
566	566_2	HOR1522	Hordeum vulgare L. convar. vulgare var. hybernum Viborg	6	H		Afghanistan	351	351	210	210	200	200	165	165	165	165	202	202	258	258	244	244	264	264	214	214	224	224	286	286	274	274	280	280	213	213	258	258	210	210	351	351	208	208	296	296	294	294
567	567_3	HOR1527	Hordeum vulgare L. convar. vulgare var. hybernum Viborg	6	H		Afghanistan	351	351	195	195	200	200	180	180	174	174	202	202	264	264	244	244	266	266	212	212	224	224	290	290	274	274	276	276	213	213	264	264	210	210	351	351	200	200	296	296	304	304
568	568_3	HOR1542	Hordeum vulgare L. convar. vulgare var. hybernum Viborg	6	H		Afghanistan	351	351	210	210	212	212	177	177	162	162	202	202	258	258	244	244	276	276	216	216	224	224	286	286	276	276	278	278	213	213	264	264	210	210	324	324	208	208	296	296	302	302
569	569_3	HOR1544	Hordeum vulgare L. convar. vulgare var. hybernum Viborg	6	H		Afghanistan	336	336	210	210	200	200	177	177	174	174	202	202	258	258	244	244	254	254	214	214	224	224	286	286	274	274	280	280	213	213	258	258	207	207	324	324	208	208	296	296	302	302
570	570_2	HOR1548	Hordeum vulgare L. convar. vulgare var. hybernum Viborg	6	H		Afghanistan	351	351	210	210	212	212	177	177	165	165	262	262	258	258	246	246	276	276	214	214	224	224	286	286	276	276	280	280	213	213	258	258	210	210	324	324	204	204	296	296	302	302
571	571_2	HOR1550	Hordeum vulgare L. convar. vulgare var. hybernum Viborg	6	H		Afghanistan	351	351	210	210	200	200	177	177	165	165	202	202	267	267	244	244	264	264	214	214	224	224	286	286	274	274	280	280	213	213	258	258	210	210	351	351	208	208	296	296	302	302
572	572_1	HOR1551	Hordeum vulgare L. convar. vulgare var. hybernum Viborg	6	H		Afghanistan	351	351	210	210	200	200	177	177	165	165	202	202	267	267	244	244	264	264	214	214	224	224	286	286	274	274	280	280	213	213	258	258	210	210	351	351	208	208	296	296	302	302
573	573_3	HOR1553	Hordeum vulgare L. convar. vulgare var. hybernum Viborg	6	H		Afghanistan	351	351	204	204	200	200	177	177	165	165	202	202	267	267	244	244	254	254	216	216	224	224	286	286	-99999	-99999	278	278	213	213	258	258	210	210	324	324	208	208	296	296	294	294
574	574_3	HOR1673	Hordeum vulgare L. convar. vulgare var. densum Sér.	6	H		Afghanistan	336	336	210	210	198	198	177	177	174	174	202	202	258	258	246	246	256	256	216	216	228	228	290	290	274	274	278	278	213	213	267	267	210	210	351	351	212	212	296	296	302	302
576	576_3	HOR1702	Hordeum vulgare L. convar. vulgare var. parallelum Körn.	6	H		Afghanistan	351	351	195	195	200	200	177	177	168	168	202	202	258	258	244	244	266	266	214	214	228	228	286	286	276	276	276	276	213	213	264	264	210	210	324	324	204	204	296	296	300	300
577	577_2	HOR1703	Hordeum vulgare L. convar. vulgare var. hybernum Viborg	6	H		Afghanistan	261	261	201	201	204	204	177	177	174	174	202	202	267	267	246	246	266	266	214	214	224	224	284	284	274	274	274	274	216	216	258	258	210	210	324	324	208	208	300	300	300	300
578	578_2	HOR1704	Hordeum vulgare L. convar. vulgare var. hybernum Viborg	6	H		Afghanistan	351	351	213	213	-99999	-99999	174	174	174	174	202	202	258	258	246	246	276	276	214	214	228	228	286	286	274	274	278	278	213	213	264	264	210	210	351	351	208	208	296	296	302	302
579	579_2	HOR1710	Hordeum vulgare L. convar. vulgare var. hybernum Viborg	6	H		Afghanistan	261	261	210	210	-99999	-99999	177	177	165	165	258	258	258	258	244	244	266	266	210	210	224	224	286	286	274	274	280	280	213	213	264	264	210	210	345	345	208	208	296	296	302	302
580	580_4	HOR1712	Hordeum vulgare L. convar. vulgare var. hybernum Viborg	6	H		Afghanistan	336	336	204	204	212	212	180	180	174	174	202	202	267	267	246	246	264	264	214	214	228	228	290	290	276	276	276	276	213	213	267	267	207	207	-99999	-99999	200	200	292	292	294	294
581	581_1	HOR1713	Hordeum vulgare L. convar. vulgare var. hybernum Viborg	6	H		Afghanistan	351	351	213	213	200	200	177	177	174	174	202	202	258	258	246	246	254	254	214	214	224	224	286	286	276	276	280	280	213	213	258	258	210	210	324	324	200	200	296	296	302	302
582	582_2	HOR1747	Hordeum vulgare L. convar. vulgare var. parallelum Körn.	6	H		Afghanistan	261	261	210	210	198	198	177	177	174	174	254	254	264	264	244	244	266	266	214	214	224	224	286	286	274	274	276	276	216	216	264	264	210	210	351	351	204	204	296	296	294	294
583	583_1	HOR1758	Hordeum vulgare L. convar. vulgare var. densum Sér.	6	H		Afghanistan	261	261	210	210	200	200	177	177	-99999	-99999	202	202	258	258	246	246	266	266	216	216	224	224	286	286	276	276	276	276	213	213	267	267	210	210	351	351	204	204	296	296	294	294
584	584_3	HOR1774	Hordeum vulgare L. convar. vulgare var. hybernum Viborg	6	H		Afghanistan	351	351	210	210	200	200	177	177	165	165	254	254	267	267	244	244	264	264	214	214	224	224	286	286	274	274	280	280	213	213	258	258	210	210	351	351	208	208	296	296	302	302
586	586_3	HOR1776	Hordeum vulgare L. convar. vulgare var. hybernum Viborg	6	H		Afghanistan	351	351	213	213	202	202	171	171	165	165	206	206	258	258	246	246	276	276	214	214	228	228	290	290	274	274	278	278	216	216	264	264	210	210	345	345	208	208	296	296	302	302
587	587_3	HOR1777	Hordeum vulgare L. convar. vulgare var. hybernum Viborg	6	H		Afghanistan	351	351	210	210	200	200	177	177	174	174	202	202	267	267	246	246	276	276	214	214	224	224	286	286	276	276	280	280	213	213	258	258	210	210	351	351	200	200	296	296	302	302
588	588_1	HOR1778	Hordeum vulgare L. convar. vulgare var. hybernum Viborg	6	H		Afghanistan	351	351	213	213	200	200	177	177	165	165	254	254	258	258	246	246	254	254	216	216	228	228	286	286	276	276	276	276	213	213	264	264	210	210	351	351	208	208	296	296	294	294
589	589_1	HOR1779	Hordeum vulgare L. convar. vulgare var. hybernum Viborg	6	H		Afghanistan	351	351	195	195	210	210	174	174	174	174	202	202	267	267	244	244	266	266	214	214	228	228	286	286	274	274	278	278	213	213	264	264	210	210	324	324	208	208	292	292	302	302
590	590_2	HOR1784	Hordeum vulgare L. convar. vulgare var. hybernum Viborg	6	H		Afghanistan	336	336	204	204	200	200	174	174	174	174	202	202	258	258	246	246	276	276	214	214	228	228	286	286	276	276	278	278	213	213	264	264	210	210	345	345	208	208	296	296	302	302
591	591_4	HOR1785	Hordeum vulgare L. convar. vulgare var. hybernum Viborg	6	H		Afghanistan	351	351	195	195	200	214	180	180	174	174	202	202	264	264	244	244	264	264	214	214	224	224	290	290	274	274	276	276	213	213	264	264	210	210	324	324	200	200	296	296	304	304
592	592_1	HOR1786	Hordeum vulgare L. convar. vulgare var. hybernum Viborg	6	H		Afghanistan	351	351	195	195	200	200	180	180	174	174	202	202	264	264	-99999	-99999	264	264	214	214	224	224	290	290	274	274	276	276	213	213	264	264	210	210	324	324	200	200	296	296	304	304
593	593_1	HOR1787	Hordeum vulgare L. convar. vulgare var. hybernum Viborg	6	H		Afghanistan	351	351	195	195	200	200	180	180	174	174	202	202	264	264	244	244	276	276	214	214	224	224	290	290	274	274	276	276	213	213	264	264	207	207	351	351	200	200	296	296	304	304
594	594_2	HOR1788	Hordeum vulgare L. convar. vulgare var. hybernum Viborg	6	H		Afghanistan	261	261	210	210	200	200	177	177	165	165	262	262	258	258	244	244	254	254	214	214	224	224	290	290	274	274	280	280	213	213	267	267	210	210	324	324	204	204	296	296	302	302
595	595_2	HOR1789	Hordeum vulgare L. convar. vulgare var. hybernum Viborg	6	H		Afghanistan	336	336	213	213	212	212	177	177	165	165	246	246	258	258	246	246	276	276	216	216	228	228	286	286	276	276	278	278	213	213	264	264	210	210	324	324	208	208	296	296	302	302
596	596_2	HOR1790	Hordeum vulgare L. convar. vulgare var. hybernum Viborg	6	H		Afghanistan	351	351	195	195	212	212	177	177	165	165	202	202	258	258	246	246	258	258	216	216	224	224	286	286	276	276	278	278	213	213	264	264	210	210	324	324	208	208	296	296	302	302
597	597_1	HOR1791	Hordeum vulgare L. convar. vulgare var. hybernum Viborg	6	H		Afghanistan	261	261	195	195	-99999	-99999	174	174	165	165	238	238	264	264	244	244	254	254	212	212	228	228	292	292	274	274	274	274	210	210	267	267	210	210	345	345	208	208	300	300	294	294
598	598_4	HOR1792	Hordeum vulgare L. convar. vulgare var. hybernum Viborg	6	H		Afghanistan	351	351	213	213	214	214	177	177	165	165	206	206	258	258	246	246	258	258	216	216	224	224	286	286	276	276	276	276	213	213	264	264	210	210	324	324	208	208	296	296	302	302
599	599_1	HOR1793	Hordeum vulgare L. convar. vulgare var. hybernum Viborg	6	H		Afghanistan	351	351	195	195	212	212	177	177	165	165	202	202	258	258	244	244	276	276	216	216	224	224	286	286	276	276	278	278	213	213	264	264	210	210	324	324	208	208	296	296	302	302
600	600_1	HOR1795	Hordeum vulgare L. convar. vulgare var. hybernum Viborg	6	H		Afghanistan	351	351	210	210	200	200	177	177	165	165	202	202	258	258	246	246	276	276	216	216	224	224	286	286	274	274	280	280	213	213	258	258	207	207	351	351	200	200	296	296	302	302
601	601_3	HOR1796	Hordeum vulgare L. convar. vulgare var. hybernum Viborg	6	H		Afghanistan	261	261	204	204	200	200	177	177	165	165	262	262	258	258	246	246	254	254	210	210	224	224	286	286	274	274	278	278	213	213	258	258	210	210	324	324	208	208	296	296	294	294
602	602_4	HOR1798	Hordeum vulgare L. convar. vulgare var. hybernum Viborg	6	H		Afghanistan	336	336	195	195	214	214	177	177	165	165	202	202	267	267	244	244	278	278	218	218	224	224	286	286	276	276	278	278	213	213	258	258	210	210	351	351	208	208	296	296	300	300
603	603_4	HOR1800	Hordeum vulgare L. convar. vulgare var. hybernum Viborg	6	H		Afghanistan	351	351	210	210	214	214	177	177	165	165	202	202	267	267	244	244	278	278	214	214	224	224	286	286	-99999	-99999	280	280	213	213	264	264	210	210	351	351	208	208	296	296	300	300
604	604_3	HOR1803	Hordeum vulgare L. convar. vulgare var. hybernum Viborg	6	H		Afghanistan	351	351	204	204	200	200	177	177	174	174	202	202	267	267	244	244	254	254	216	216	224	224	286	286	274	274	278	278	213	213	264	264	210	210	324	324	208	208	296	296	294	294
605	605_3	HOR1804	Hordeum vulgare L. convar. vulgare var. hybernum Viborg	6	H		Afghanistan	351	351	204	204	200	200	177	177	174	174	202	202	258	258	244	244	254	254	216	216	224	224	286	286	274	274	278	278	213	213	264	264	210	210	324	324	208	208	296	296	294	294
606	606_2	HOR1805	Hordeum vulgare L. convar. vulgare var. hybernum Viborg	6	H		Afghanistan	336	336	210	210	200	200	180	180	165	165	202	202	258	258	244	244	254	254	214	214	224	224	286	286	276	276	280	280	213	213	258	258	210	210	324	324	208	208	296	296	302	302
607	607_2	HOR1806	Hordeum vulgare L. convar. vulgare var. hybernum Viborg	6	H		Afghanistan	297	297	186	195	200	200	171	171	165	165	194	194	258	258	244	244	276	276	216	216	224	224	286	286	276	276	280	280	213	213	258	258	210	210	324	324	208	208	296	296	302	302
608	608_3	HOR1808	Hordeum vulgare L. convar. vulgare var. hybernum Viborg	6	H		Afghanistan	336	336	195	195	200	200	-99999	-99999	174	174	202	202	258	258	244	244	276	276	214	214	224	224	286	286	276	276	280	280	213	213	-99999	-99999	210	210	324	324	208	208	296	296	302	302
609	609_2	HOR1809	Hordeum vulgare L. convar. vulgare var. hybernum Viborg	6	H		Afghanistan	351	351	195	195	214	214	162	162	165	165	202	202	258	258	244	244	276	276	216	216	224	224	286	286	276	276	280	280	213	213	264	264	210	210	324	324	208	208	296	296	294	294
610	610_2	HOR1811	Hordeum vulgare L. convar. vulgare var. hybernum Viborg	6	H		Afghanistan	351	351	195	195	200	200	171	180	165	174	194	202	264	264	244	244	250	262	214	214	224	224	290	290	274	274	278	278	213	213	264	264	207	207	324	324	200	200	296	296	294	294
611	611_3	HOR1814	Hordeum vulgare L. convar. vulgare var. hybernum Viborg	6	H		Afghanistan	351	351	210	210	214	214	177	177	165	165	202	202	258	258	244	244	276	276	216	216	224	224	286	286	276	276	280	280	213	213	264	264	210	210	324	324	208	208	296	296	302	302
612	612_3	HOR1815	Hordeum vulgare L. convar. vulgare var. hybernum Viborg	6	H		Afghanistan	351	351	195	195	200	200	174	174	165	165	254	254	264	264	244	244	262	262	214	214	224	224	286	286	274	274	276	276	213	213	267	267	210	210	351	351	208	208	296	296	304	304
613	613_2	HOR1819	Hordeum vulgare L. convar. vulgare var. hybernum Viborg	6	H		Afghanistan	351	351	204	204	200	200	-99999	-99999	165	165	202	202	267	267	234	246	266	266	214	214	224	224	286	286	276	276	280	280	213	213	-99999	-99999	207	210	351	351	208	208	296	296	294	294
615	615_3	HOR1823	Hordeum vulgare L. convar. vulgare var. hybernum Viborg	6	H		Afghanistan	351	351	210	210	200	200	-99999	-99999	165	165	202	202	267	267	244	244	264	264	214	214	224	224	286	286	274	274	282	282	213	213	-99999	-99999	210	210	351	351	208	208	296	296	302	302
616	616_2	HOR1824	Hordeum vulgare L. convar. vulgare var. hybernum Viborg	6	H		Afghanistan	327	327	216	216	190	190	168	168	165	165	242	242	258	258	244	244	264	264	214	214	228	228	286	286	274	274	282	282	213	213	258	258	210	210	345	345	196	208	296	296	294	294
617	617_3	HOR1825	Hordeum vulgare L. convar. vulgare var. hybernum Viborg	6	H		Afghanistan	261	261	195	195	200	200	174	174	165	165	258	258	264	264	246	246	266	266	212	212	224	224	284	284	274	274	276	276	210	210	267	267	210	210	336	336	208	208	300	300	294	294
618	618_2	HOR1826	Hordeum vulgare L. convar. vulgare var. hybernum Viborg	6	H		Afghanistan	261	261	210	210	200	200	177	177	165	165	258	258	258	258	244	244	254	254	210	210	224	224	286	286	274	274	280	280	213	213	264	264	210	210	324	324	204	204	296	296	294	294
619	619_3	HOR1829	Hordeum vulgare L. convar. vulgare var. hybernum Viborg	6	H		Afghanistan	351	351	210	210	200	200	-99999	-99999	174	174	194	202	258	258	246	246	276	276	216	216	228	228	286	286	276	276	282	282	213	213	-99999	-99999	210	210	324	324	200	200	296	296	302	302
620	620_4	HOR1830	Hordeum vulgare L. convar. vulgare var. hybernum Viborg	6	H		Afghanistan	264	264	210	210	200	200	177	177	162	162	262	262	256	256	246	246	254	254	210	210	224	224	286	286	274	274	280	280	213	213	258	258	210	210	322	322	204	204	295	295	294	294
621	621_2	HOR1831	Hordeum vulgare L. convar. vulgare var. hybernum Viborg	6	H		Afghanistan	351	351	210	210	200	200	177	177	174	174	202	202	258	258	246	246	276	276	216	216	224	224	286	286	276	276	282	282	213	213	258	258	210	210	324	324	200	200	296	296	302	302
622	622_4	HOR1833	Hordeum vulgare L. convar. vulgare var. hybernum Viborg	6	H		Afghanistan	336	336	210	210	200	200	177	177	165	165	202	202	258	258	246	246	254	254	216	216	228	228	286	286	274	274	282	282	213	213	258	258	207	207	324	324	200	200	296	296	294	294
623	623_1	HOR1835	Hordeum vulgare L. convar. vulgare var. hybernum Viborg	6	H		Afghanistan	351	351	210	210	200	200	162	162	174	174	202	202	258	258	246	246	276	276	216	216	224	224	286	286	276	276	282	282	213	213	258	258	210	210	324	324	200	200	296	296	294	294
624	624_1	HOR1836	Hordeum vulgare L. convar. vulgare var. hybernum Viborg	6	H		Afghanistan	261	261	204	204	212	212	165	165	165	165	242	242	258	258	246	246	254	254	210	210	224	224	286	286	274	274	280	280	213	213	258	258	210	210	324	324	204	204	296	296	302	302
625	625_2	HOR1838	Hordeum vulgare L. convar. vulgare var. hybernum Viborg	6	H		Afghanistan	261	261	210	210	212	212	177	177	165	165	258	258	258	258	244	244	254	254	210	210	224	224	286	286	274	274	282	282	213	213	264	264	210	210	324	324	204	204	296	296	294	294
626	626_1	HOR1839	Hordeum vulgare L. convar. vulgare var. hybernum Viborg	6	H		Afghanistan	261	261	204	204	212	212	177	177	165	165	262	262	258	258	246	246	254	254	210	210	228	228	286	286	274	274	280	280	213	213	258	258	210	210	324	324	204	204	296	296	294	294
627	627_3	HOR1840	Hordeum vulgare L. convar. vulgare var. hybernum Viborg	6	H		Afghanistan	261	261	204	204	212	212	177	177	165	165	262	262	258	258	246	246	254	254	210	210	224	224	286	286	274	274	280	280	213	213	258	258	210	210	324	324	204	204	296	296	294	294
628	628_2	HOR1841	Hordeum vulgare L. convar. vulgare var. hybernum Viborg	6	H		Afghanistan	261	261	210	210	200	200	177	177	165	165	258	258	258	258	244	244	266	266	210	210	224	224	286	286	274	274	278	278	213	213	264	264	210	210	324	324	208	208	296	296	294	294
629	629_3	HOR1842	Hordeum vulgare L. convar. vulgare var. hybernum Viborg	6	H		Afghanistan	351	351	210	210	200	200	177	177	165	165	202	202	258	258	246	246	254	254	214	214	228	228	286	286	276	276	282	282	213	213	258	258	207	207	324	324	200	200	296	296	294	294
630	630_1	HOR1843	Hordeum vulgare L. convar. vulgare var. hybernum Viborg	6	H		Afghanistan	261	261	210	210	200	200	174	174	165	165	262	262	258	258	246	246	254	254	210	210	224	224	286	286	272	272	282	282	213	213	264	264	210	210	345	345	208	208	296	296	300	300
631	631_1	HOR1844	Hordeum vulgare L. convar. vulgare var. hybernum Viborg	6	H		Afghanistan	261	261	210	210	200	200	177	177	165	165	266	266	258	258	246	246	266	266	210	210	228	228	286	286	274	274	278	278	213	213	264	264	210	210	345	345	208	208	296	296	294	294
632	632_2	HOR1851	Hordeum vulgare L. convar. vulgare var. hybernum Viborg	6	H		Afghanistan	351	351	195	195	200	200	177	177	174	174	202	202	264	264	244	244	276	276	212	212	224	224	290	290	272	272	278	278	213	213	264	264	207	207	324	324	200	200	296	296	294	294
633	633_2	HOR1940	Hordeum vulgare L. convar. vulgare var. hybernum Viborg	6	H		Afghanistan	261	261	210	210	200	200	177	177	165	165	242	242	258	258	244	244	254	254	210	210	224	224	286	286	274	274	280	280	213	213	264	264	210	210	324	324	204	204	296	296	302	302
634	634_2	HOR1968	Hordeum vulgare L. convar. vulgare var. hybernum Viborg	6	H		Afghanistan	261	261	210	210	200	200	177	177	165	165	258	258	258	258	244	244	266	266	210	210	224	224	286	286	274	274	282	282	213	213	264	264	210	210	336	345	208	208	296	296	294	294
635	635_	HOR1970	Hordeum vulgare L. convar. vulgare var. hybernum Viborg	6	H		Afghanistan	351	351	204	204	200	200	177	177	174	174	202	202	267	267	244	244	254	254	216	216	224	224	286	286	274	274	280	280	213	213	264	264	210	210	324	324	208	208	296	296	294	294
636	636_2	HOR1990	Hordeum vulgare L. convar. vulgare var. hybernum Viborg	6	H		Afghanistan	351	351	195	195	202	202	183	183	174	174	230	230	264	264	246	246	254	254	214	214	224	224	286	286	282	282	282	282	216	216	258	258	210	210	336	336	208	208	296	296	294	294
637	637_3	HOR2261	Hordeum vulgare L. convar. vulgare var. hybernum Viborg	6	H		Afghanistan	351	351	201	201	206	206	174	174	165	165	242	242	267	267	246	246	264	264	214	214	228	228	286	286	274	274	282	282	213	213	258	258	210	210	351	351	208	208	300	300	300	300
638	638_4	HOR2263	Hordeum vulgare L. convar. vulgare var. hybernum Viborg	6	H		Afghanistan	351	351	195	195	200	200	177	177	174	174	202	202	264	264	244	244	276	276	212	212	224	224	290	290	272	272	278	278	213	213	264	264	207	207	351	351	208	208	296	296	294	294
640	640_4	HOR2385	Hordeum vulgare L. convar. vulgare var. hybernum Viborg	6	H		Afghanistan	261	261	210	210	200	200	177	177	165	165	258	258	258	258	244	244	254	254	210	210	224	224	286	286	272	272	280	280	213	213	264	264	210	210	324	324	204	204	296	296	294	294
641	641_1	HOR2407	Hordeum vulgare L. convar. vulgare var. hybernum Viborg	6	H		Afghanistan	261	261	204	204	200	200	177	177	165	165	262	262	258	258	246	246	254	254	210	210	228	228	286	286	274	274	280	280	213	213	258	258	210	210	324	324	208	208	296	296	294	294
642	642_2	HOR2904	Hordeum vulgare L. convar. vulgare var. subpyramidatum (Orlov) Mansf.	6	H		Afghanistan	261	261	210	210	200	200	177	177	174	174	254	254	267	267	244	244	254	254	214	214	228	228	286	286	274	274	278	278	213	213	258	258	207	207	351	351	208	208	296	296	294	294
643	643_1	HOR2905	Hordeum vulgare L. convar. vulgare var. hybernum Viborg	6	H		Afghanistan	261	261	198	198	200	208	165	174	165	165	238	238	264	264	244	244	264	264	212	212	228	228	284	284	274	274	280	280	216	216	267	267	210	210	336	336	204	204	300	300	294	294
644	644_3	HOR2907	Hordeum vulgare L. convar. vulgare var. parallelum Körn.	6	H		Afghanistan	261	261	204	204	200	200	177	177	168	168	202	202	258	258	246	246	266	266	-99999	-99999	228	228	286	286	276	276	278	278	213	213	267	267	210	210	351	351	204	204	296	296	294	294
645	645_1	HOR4428	Hordeum vulgare L. convar. vulgare var. hybernum Viborg	6	H		Afghanistan	261	261	195	195	200	200	177	177	165	165	266	266	264	264	244	244	262	262	214	214	228	228	292	292	274	274	276	276	210	210	267	267	210	210	345	345	208	208	296	296	304	304
647	647_3	HOR9551	Hordeum vulgare L. convar. vulgare var. hybernum Viborg	6	H		Afghanistan	351	351	210	210	212	212	168	177	165	165	196	196	258	258	244	244	276	276	216	216	224	224	286	286	276	276	278	278	213	213	264	264	210	210	324	324	208	208	296	296	304	304
648	648_3	HOR12222	Hordeum vulgare L. convar. vulgare var. densum Sér.	6	H		Afghanistan	351	351	195	195	200	200	177	177	168	168	202	202	258	258	246	246	266	266	214	214	224	224	286	286	274	274	278	278	213	213	267	267	210	210	351	351	204	204	296	296	302	302
649	649_3	BCC4	Hordeum vulgare L.	6	H		Afghanistan	261	261	204	204	200	200	177	177	174	174	202	202	258	258	246	246	266	266	216	216	224	224	286	286	276	276	278	278	213	213	264	264	207	207	351	351	208	208	296	296	294	294
650	650_1	BCC6	Hordeum vulgare L. convar. vulgare	6	H		Afghanistan	351	351	195	195	200	200	171	171	174	174	202	202	267	267	246	246	266	266	214	214	228	228	288	288	274	274	282	282	213	213	264	264	207	207	324	324	208	208	296	296	304	304
651	651_1	HOR736	Hordeum vulgare L. convar. vulgare var. hybernum Viborg	6	H		Albania	351	351	201	201	200	200	165	165	165	165	238	238	264	264	244	244	262	262	214	214	228	228	286	286	274	274	276	276	210	210	267	267	213	213	336	336	204	204	296	296	294	294
652	652_1	HOR739	Hordeum vulgare L. convar. vulgare var. hybernum Viborg	6	H		Albania	261	261	201	201	200	200	174	174	165	165	266	266	264	264	246	246	254	254	-99999	-99999	224	224	288	288	274	274	276	276	216	216	267	267	210	210	336	336	204	204	300	300	294	294
653	653_2	HOR740	Hordeum vulgare L. convar. vulgare var. parallelum Körn.	6	H		Albania	261	261	195	195	206	206	165	174	165	165	222	222	267	267	246	246	254	254	212	212	224	224	284	284	274	274	280	280	210	210	267	267	210	210	351	351	212	212	296	296	294	294
654	654_2	HOR741	Hordeum vulgare L. convar. vulgare var. hybernum Viborg	6	H		Albania	261	261	201	201	206	206	174	174	165	165	246	246	264	264	248	248	264	264	-99999	-99999	228	228	286	286	274	274	282	282	210	210	267	267	210	210	351	351	204	204	300	300	294	294
655	655_3	HOR749	Hordeum vulgare L. convar. vulgare var. hybernum Viborg	6	H		Albania	261	261	201	201	226	226	174	174	165	165	230	230	267	267	244	244	264	264	212	212	224	224	284	284	274	274	278	278	210	210	267	267	210	210	336	336	212	212	290	290	294	294
656	656_1	HOR750	Hordeum vulgare L. convar. vulgare var. hybernum Viborg	6	H		Albania	261	261	201	201	200	200	177	177	165	165	234	234	264	264	246	246	266	266	212	212	224	224	286	286	274	274	282	282	210	210	267	267	207	207	336	336	204	204	296	296	294	294
657	657_3	HOR755	Hordeum vulgare L. convar. vulgare var. hybernum Viborg	6	H		Albania	351	351	201	201	200	200	-99999	-99999	165	165	230	230	264	264	246	246	266	266	-99999	-99999	228	228	286	286	274	274	276	276	210	210	-99999	-99999	213	213	336	336	212	212	300	300	294	294
658	658_2	HOR756	Hordeum vulgare L. convar. vulgare var. hybernum Viborg	6	H		Albania	351	351	201	201	200	200	162	162	165	165	246	246	264	264	246	246	266	266	212	212	228	228	286	286	274	274	276	276	210	210	267	267	213	213	336	336	208	208	296	296	302	302
659	659_2	HOR770	Hordeum vulgare L. convar. vulgare var. hybernum Viborg	6	H		Albania	261	261	201	201	200	200	-99999	-99999	165	165	238	238	264	264	244	244	264	264	212	212	224	224	284	284	274	274	282	282	210	210	-99999	-99999	207	207	336	336	212	212	296	296	300	300
660	660_1	HOR772	Hordeum vulgare L. convar. vulgare var. hybernum Viborg	6	H		Albania	261	261	201	201	202	206	171	171	165	165	238	246	264	264	246	246	254	254	212	212	224	224	288	288	274	274	276	276	210	210	267	267	210	210	336	336	204	204	300	300	302	302
661	661_3	HOR1237	Hordeum vulgare L. convar. vulgare var. hybernum Viborg	6	H		Albania	261	261	201	201	200	200	-99999	-99999	165	165	230	230	267	267	-99999	-99999	264	264	212	212	224	224	-99999	-99999	-99999	-99999	280	280	210	210	-99999	-99999	207	207	-99999	-99999	-99999	-99999	296	296	302	302
662	662_1	HOR1269	Hordeum vulgare L. convar. vulgare var. hybernum Viborg	6	H		Albania	261	261	201	201	222	222	174	174	165	165	230	230	264	264	246	246	254	254	212	212	224	224	284	284	274	274	280	280	210	210	264	264	210	210	336	336	212	212	296	296	302	302
663	663_2	HOR1281	Hordeum vulgare L. convar. vulgare var. hybernum Viborg	6	H		Albania	261	261	195	195	200	200	174	174	174	174	270	270	264	264	246	246	254	254	212	212	228	228	284	284	274	274	280	280	210	210	267	267	210	210	336	336	208	208	296	296	302	302
664	664_1	HOR1287	Hordeum vulgare L. convar. vulgare var. hybernum Viborg	6	H		Albania	261	261	201	201	200	200	180	180	165	165	238	238	264	264	244	244	264	264	216	216	224	224	284	284	274	274	280	280	216	216	264	264	216	216	336	336	208	208	300	300	294	294
665	665_3	HOR1381	Hordeum vulgare L. convar. vulgare var. hybernum Viborg	6	H		Albania	261	261	195	195	200	200	159	159	165	165	262	262	267	267	246	246	256	256	212	212	224	224	284	284	274	274	280	280	213	213	267	267	210	210	351	351	208	208	296	296	294	294
666	666_1	HOR4146	Hordeum vulgare L. convar. vulgare var. hybernum Viborg	6	H		Algeria	351	351	201	201	200	200	174	174	165	165	270	270	264	264	246	246	264	264	216	216	228	228	286	286	274	274	276	276	216	216	267	267	216	216	345	345	208	208	300	300	294	294
667	667_3	HOR4150	Hordeum vulgare L. convar. vulgare var. hybernum Viborg	6	H		Algeria	351	351	201	201	200	200	165	177	165	165	250	250	264	264	246	246	266	266	212	212	228	228	286	286	274	274	276	276	216	216	267	267	207	207	336	336	204	204	300	300	294	294
668	668_1	HOR9788	Hordeum vulgare L. convar. vulgare var. hybernum Viborg	6	H		Algeria	351	351	201	201	202	202	174	174	165	165	250	250	264	264	244	244	264	264	214	214	224	224	286	286	274	274	278	278	210	210	267	267	210	210	351	351	208	208	300	300	294	294
669	669_2	HOR93	Hordeum vulgare L. convar. vulgare var. hybernum Viborg	6	H		Austria	261	261	195	195	202	202	168	168	174	174	266	266	264	264	244	244	264	264	212	212	228	228	284	284	274	274	276	276	210	210	267	267	210	210	336	336	208	208	288	288	294	294
670	670_2	HOR94	Hordeum vulgare L. convar. vulgare var. hybernum Viborg	6	H		Austria	261	261	195	195	200	200	177	177	165	165	258	258	264	264	246	246	264	264	212	212	228	228	284	284	274	274	276	276	210	210	267	267	210	210	336	336	212	212	296	296	302	302
671	671_2	HOR106	Hordeum vulgare L. convar. vulgare var. parallelum Körn.	6	H		Austria	261	261	195	195	200	200	177	177	165	165	258	258	264	264	246	246	264	264	212	212	224	224	284	284	274	274	276	276	210	210	267	267	210	210	336	336	212	212	296	296	294	294
672	672_4	HOR3959	Hordeum vulgare L. convar. vulgare var. hybernum Viborg	6	H		Austria	261	261	195	195	200	200	174	174	174	174	250	250	264	264	244	244	254	254	212	212	224	224	284	284	274	274	276	276	216	216	267	267	210	210	336	336	208	208	288	288	302	302
673	673_2	HOR3960	Hordeum vulgare L. convar. vulgare var. hybernum Viborg	6	H		Austria	261	261	195	195	200	200	177	177	165	165	262	262	264	264	244	244	256	256	212	212	224	224	284	284	274	274	282	282	210	210	267	267	210	210	336	336	208	208	296	296	294	294
674	674_4	HOR3961	Hordeum vulgare L. convar. vulgare var. hybernum Viborg	6	H		Austria	261	261	195	195	200	200	177	177	165	165	258	258	264	264	244	244	264	264	212	212	224	224	284	284	274	274	274	274	210	210	267	267	210	210	336	336	212	212	300	300	302	302
675	675_1	HOR3962	Hordeum vulgare L. convar. vulgare var. hybernum Viborg	6	H		Austria	261	261	195	195	200	200	171	177	165	165	258	258	264	264	244	244	264	264	212	212	228	228	284	284	274	274	276	276	210	210	267	267	210	210	336	336	212	212	300	300	300	300
676	676_2	HOR3968	Hordeum vulgare L. convar. vulgare var. hybernum Viborg	6	H		Austria	261	261	195	195	200	200	180	180	174	174	258	258	264	264	244	244	254	254	212	212	224	224	284	284	274	274	278	278	210	210	267	267	210	210	336	336	208	208	288	288	302	302
677	677_4	HOR9854	Hordeum vulgare L. convar. vulgare var. hybernum Viborg	6	H		Austria	261	261	195	195	200	200	171	171	174	174	254	254	264	264	244	244	264	264	212	212	224	224	284	284	274	274	276	276	210	210	267	267	210	210	336	336	208	208	288	288	294	294
678	678_2	HOR9858	Hordeum vulgare L. convar. vulgare var. hybernum Viborg	6	H		Austria	261	261	195	195	200	206	174	174	165	165	238	238	264	264	244	244	264	264	212	212	228	228	284	284	272	272	276	276	216	216	264	264	210	210	351	351	208	208	296	296	294	294
679	679_1	HOR9859	Hordeum vulgare L. convar. vulgare var. hybernum Viborg	6	H		Austria	261	261	195	195	200	206	174	174	165	165	258	258	267	267	246	246	264	264	212	212	228	228	284	284	272	272	276	276	210	210	267	267	210	210	336	336	208	208	288	288	294	294
680	680_1	HOR10094	Hordeum vulgare L. convar. vulgare var. hybernum Viborg	6	H		Austria	261	261	195	195	200	200	171	171	174	174	270	270	267	267	246	246	264	264	214	214	224	224	284	284	272	272	276	276	210	210	267	267	210	210	336	336	208	208	288	288	294	294
681	681_2	HOR10630	Hordeum vulgare L. convar. vulgare var. hybernum Viborg	6	H		Austria	261	261	195	195	200	200	177	177	174	174	270	270	264	264	244	244	264	264	214	214	224	224	284	284	272	272	276	276	210	210	267	267	210	210	336	336	208	208	300	300	294	294
682	682_2	HOR10631	Hordeum vulgare L. convar. vulgare var. hybernum Viborg	6	H		Austria	261	261	195	195	200	200	-99999	-99999	174	174	270	270	267	267	244	244	264	264	212	212	228	228	284	284	274	274	276	276	210	210	-99999	-99999	210	210	336	336	208	208	300	300	300	300
683	683_1	HOR10632	Hordeum vulgare L. convar. vulgare var. hybernum Viborg	6	H		Austria	261	261	195	195	200	200	174	174	174	174	270	270	264	264	246	246	264	264	212	212	224	224	284	284	274	274	276	276	210	210	-99999	-99999	210	210	336	336	208	208	300	300	302	302
684	684_1	BCC1555	Hordeum vulgare L. convar. vulgare var. hybernum Viborg	6	H		Azarbaijan	351	351	210	210	212	212	177	177	168	168	254	254	264	264	244	244	254	254	-99999	-99999	224	224	286	286	274	274	280	280	213	213	264	264	210	210	345	345	208	208	296	296	302	302
685	685_1	HOR47	Hordeum vulgare L. convar. vulgare var. hybernum Viborg	6	H		Bulgaria	261	261	201	201	206	206	174	174	174	174	250	250	264	264	246	246	254	254	212	212	224	224	284	284	-99999	-99999	280	280	210	210	264	264	210	210	351	351	212	212	296	296	302	302
686	686_1	HOR372	Hordeum vulgare L. convar. vulgare var. hybernum Viborg	6	H		Bulgaria	261	261	201	201	200	200	174	174	174	174	262	262	264	264	246	246	264	264	212	212	-99999	-99999	284	284	274	274	280	280	210	210	264	264	210	210	-99999	-99999	212	212	296	296	294	294
687	687_1	HOR377	Hordeum vulgare L. convar. vulgare var. hybernum Viborg	6	H		Bulgaria	261	261	201	201	200	206	174	174	174	174	254	254	264	264	246	246	264	264	212	212	224	224	284	284	274	274	276	276	210	210	264	264	210	210	351	351	212	212	296	296	294	294
688	688_4	HOR380	Hordeum vulgare L. convar. vulgare var. hybernum Viborg	6	H		Bulgaria	261	261	195	195	200	206	174	174	174	174	230	230	264	264	246	246	264	264	212	212	224	224	284	284	272	272	280	280	210	210	264	264	210	210	351	351	212	212	296	296	294	294
689	689_3	HOR383	Hordeum vulgare L. convar. vulgare var. hybernum Viborg	6	H		Bulgaria	261	261	201	201	200	206	174	174	174	174	218	218	264	264	246	246	254	254	212	212	224	224	284	284	274	274	274	274	210	210	264	264	210	210	351	351	212	212	296	296	294	294
690	690_1	HOR384	Hordeum vulgare L. convar. vulgare var. hybernum Viborg	6	H		Bulgaria	261	261	201	201	200	206	162	162	174	174	238	238	264	264	246	246	264	264	212	212	228	228	284	284	272	272	276	276	210	210	264	264	210	210	351	351	212	212	296	296	294	294
691	691_1	HOR386	Hordeum vulgare L. convar. vulgare var. hybernum Viborg	6	H		Bulgaria	261	261	201	201	200	200	165	165	174	174	234	234	264	264	246	246	262	262	212	212	224	224	284	284	274	274	280	280	210	210	267	267	210	210	351	351	212	212	296	296	294	294
692	692_1	HOR395	Hordeum vulgare L. convar. vulgare var. hybernum Viborg	6	H		Bulgaria	261	261	201	201	200	200	174	174	165	165	230	230	267	267	246	246	254	254	212	212	224	224	284	284	272	272	280	280	210	210	-99999	-99999	207	207	336	336	216	216	296	296	294	294
693	693_1	HOR396	Hordeum vulgare L. convar. vulgare var. parallelum Körn.	6	H		Bulgaria	261	261	201	201	200	200	-99999	-99999	165	165	250	250	264	264	246	246	264	264	212	212	228	228	284	284	274	274	282	282	210	210	-99999	-99999	213	213	336	336	204	204	296	296	294	294
694	694_1	HOR397	Hordeum vulgare L. convar. vulgare var. parallelum Körn.	6	H		Bulgaria	261	261	201	201	202	202	174	174	165	165	230	230	267	267	246	246	264	264	212	212	224	224	284	284	274	274	282	282	210	210	267	267	210	210	336	336	212	212	296	296	302	302
695	695_1	HOR875	Hordeum vulgare L. convar. vulgare var. nigripallidum Regel	6	H		Bulgaria	261	261	201	201	200	200	162	162	174	174	250	250	264	264	246	246	264	264	212	212	224	224	284	284	272	272	280	280	210	210	264	264	207	207	351	351	204	204	296	296	302	302
696	696_2	BCC1562	Hordeum vulgare L. convar. vulgare var. hybernum Viborg	6	H		Bulgaria	261	261	201	201	200	206	174	174	174	174	254	254	264	264	246	246	264	264	212	212	224	224	284	284	274	274	274	274	210	210	258	258	210	210	351	351	212	212	296	296	294	294
697	697_3	BCC1567	Hordeum vulgare L. convar. vulgare var. nigrum (Willd.) Link	6	H		Bulgaria	261	261	201	201	200	200	159	165	174	174	250	250	264	264	246	246	264	264	212	212	228	228	284	284	272	272	280	280	210	210	264	264	207	207	351	351	204	204	296	296	304	304
698	698_3	HOR9461	Hordeum vulgare L. convar. vulgare var. hybernum Viborg	6	H		Bulgaria	261	261	201	201	200	200	177	177	174	174	266	266	264	264	246	246	264	264	212	212	224	224	284	284	282	282	276	276	216	216	258	258	210	210	351	351	204	204	296	296	294	294
699	699_2	HOR4427	Hordeum vulgare L. convar. vulgare var. hybernum Viborg	6	H		Croatia	351	351	195	195	200	200	162	162	174	174	230	230	264	264	244	244	254	254	212	212	228	228	290	290	282	282	282	282	213	213	258	258	210	210	336	336	208	208	300	300	300	300
700	700_1	HOR7380	Hordeum vulgare L. convar. vulgare var. hybernum Viborg	6	H		Czech	261	261	201	201	200	200	177	177	174	174	262	262	264	264	244	244	266	266	212	212	224	224	284	284	274	274	282	282	213	213	258	258	207	207	336	336	212	212	300	300	-99999	-99999
701	701_3	HOR819	Hordeum vulgare L. convar. vulgare var. hybernum Viborg	6	H		Egypt	351	351	201	201	200	200	174	174	174	174	246	246	264	264	246	246	266	266	212	212	224	224	290	290	274	274	278	278	216	216	258	258	213	213	345	345	204	204	300	300	300	300
702	702_2	HOR7419	Hordeum vulgare L. convar. vulgare var. parallelum Körn.	6	H		Egypt	351	351	195	195	218	218	174	174	165	165	262	262	264	264	246	246	256	256	212	212	228	228	286	286	274	274	276	276	213	213	264	264	210	210	-99999	-99999	212	212	300	300	294	294
703	703_4	HOR8212	Hordeum vulgare L. convar. vulgare var. hybernum Viborg	6	H		Egypt	351	351	201	201	210	210	174	174	165	165	202	202	264	264	244	244	256	256	214	214	228	228	290	290	274	274	276	276	213	213	267	267	210	210	345	345	204	204	296	296	294	294
705	705_2	HOR8659	Hordeum vulgare L. convar. vulgare var. hybernum Viborg	6	H		Egypt	351	351	195	195	210	210	174	174	165	165	258	258	267	267	244	244	254	254	216	216	224	224	286	286	276	276	280	280	210	210	258	258	210	210	351	351	212	212	284	284	294	294
706	706_2	HOR3856	Hordeum vulgare L. convar. vulgare var. parallelum Körn.	6	H		Ethiopia	351	351	192	192	200	200	177	177	174	174	230	230	264	264	244	244	264	264	214	214	224	224	286	286	282	282	282	282	216	216	267	267	210	210	339	345	200	200	296	296	300	300
707	707_4	HOR5188	Hordeum vulgare L. convar. vulgare var. gracilius Körn.	6	H		Ethiopia	351	351	189	189	194	202	171	171	171	171	230	230	264	264	244	244	254	254	214	214	224	224	290	290	282	282	282	282	216	216	267	267	210	210	339	345	200	200	296	296	302	302
708	708_4	HOR5342	Hordeum vulgare L. convar. vulgare var. hybernum Viborg	6	H		Ethiopia	351	351	195	195	200	200	177	177	171	171	234	234	264	264	244	244	264	264	-99999	-99999	224	224	286	286	282	282	282	282	213	213	267	267	204	204	336	336	200	200	296	296	302	302
709	709_1	HOR5428	Hordeum vulgare L. convar. vulgare var. breviaristatum (Vavilov) Mansf.	6	H		Ethiopia	351	351	195	195	200	200	177	177	174	174	230	230	264	264	246	246	266	266	214	214	224	224	286	286	282	282	282	282	216	216	258	258	204	204	336	336	200	200	296	296	302	302
710	710_2	HOR5593	Hordeum vulgare L. convar. vulgare var. horsfordianum Wittm.	6	H		Ethiopia	261	261	210	210	198	198	174	174	165	165	262	262	264	264	244	244	254	254	214	214	224	224	286	286	272	272	278	278	213	213	267	267	207	207	336	336	200	208	296	296	294	294
711	711_2	HOR5640	Hordeum vulgare L. convar. vulgare var. horsfordianum Wittm.	6	H		Ethiopia	351	351	201	201	202	202	174	174	165	165	254	254	267	267	244	244	264	264	214	214	224	224	288	288	272	272	278	278	210	210	267	267	207	207	336	336	204	204	296	296	304	304
712	712_3	HOR5655	Hordeum vulgare L. convar. vulgare var. densum Sér.	6	H		Ethiopia	336	336	204	204	200	200	177	177	165	165	202	202	258	258	246	246	258	258	216	216	224	224	286	286	274	274	280	280	213	213	264	264	210	210	351	351	208	216	296	296	300	300
713	713_2	HOR5683	Hordeum vulgare L. convar. vulgare var. densum Sér.	6	H		Ethiopia	261	261	204	204	200	200	177	177	165	165	202	202	258	258	244	244	258	258	218	218	224	224	286	286	274	274	274	274	210	210	267	267	210	210	336	336	208	208	296	296	300	300
714	714_2	HOR5865	Hordeum vulgare L. convar. vulgare var. rikotense Regel	6	H		Ethiopia	351	351	201	201	198	198	174	174	174	174	258	258	267	267	246	246	254	254	212	212	228	228	284	284	274	274	274	274	216	216	267	267	207	207	351	351	204	212	296	296	294	294
715	715_4	HOR5876	Hordeum vulgare L. convar. vulgare var. rikotense Regel	6	H		Ethiopia	261	261	201	201	204	204	162	162	168	168	250	250	264	264	244	244	256	256	-99999	-99999	224	224	284	284	274	274	278	278	210	210	270	270	207	207	336	336	204	204	296	296	302	302
716	716_2	HOR5939	Hordeum vulgare L. convar. vulgare var. coerulescens Sér.	6	H		Ethiopia	351	351	192	192	200	200	177	177	174	174	230	230	264	264	246	246	264	264	218	218	224	224	290	290	276	276	282	282	216	216	267	267	210	210	345	345	200	200	296	296	302	302
717	717_3	HOR5954	Hordeum vulgare L. convar. vulgare var. schimperianum Körn.	6	H		Ethiopia	351	351	192	192	200	200	177	177	174	174	230	230	264	264	244	244	264	264	214	214	224	224	290	290	282	282	282	282	216	216	267	267	210	210	339	345	200	200	296	296	302	302
718	718_2	HOR6238	Hordeum vulgare L. convar. vulgare var. nigrum (Willd.) Link	6	H		Ethiopia	351	351	192	192	200	200	177	177	174	174	230	230	264	264	246	246	264	264	214	214	224	224	290	290	276	276	282	282	216	216	267	267	210	210	345	345	200	200	296	296	302	302
719	719_4	HOR6243	Hordeum vulgare L. convar. vulgare var. parallelum Körn.	6	H		Ethiopia	351	351	195	195	200	200	177	177	174	174	234	234	264	264	244	244	264	264	214	214	224	224	286	286	-99999	-99999	282	282	213	213	267	267	204	204	336	336	200	200	296	296	302	302
720	720_2	HOR6246	Hordeum vulgare L. convar. vulgare var. subviolaceum Körn.	6	H		Ethiopia	351	351	195	195	200	200	177	177	174	174	230	230	264	264	246	246	264	264	214	214	224	224	286	286	282	282	282	282	216	216	267	267	210	210	345	345	200	200	296	296	302	302
721	721_1	HOR6252	Hordeum vulgare L. convar. vulgare var. gracilius Körn.	6	H		Ethiopia	351	351	192	192	200	200	177	177	174	174	230	230	264	264	246	246	264	264	214	214	224	224	290	290	282	282	282	282	216	216	267	267	204	204	345	345	200	200	296	296	302	302
722	722_2	HOR6253	Hordeum vulgare L. convar. vulgare var. subviolaceum Körn.	6	H		Ethiopia	351	351	-99999	-99999	200	200	177	177	174	174	250	250	264	264	246	246	256	256	212	212	224	224	286	286	282	282	282	282	216	216	267	267	210	210	345	345	200	200	300	300	302	302
724	724_2	HOR6320	Hordeum vulgare L. convar. vulgare var. nigrum (Willd.) Link	6	H		Ethiopia	351	351	192	192	200	200	177	177	174	174	230	230	264	264	246	246	266	266	214	214	224	224	290	290	282	282	282	282	216	216	267	267	210	210	336	336	200	200	296	296	302	302
725	725_2	HOR6327	Hordeum vulgare L. convar. vulgare var. nigripallidum Regel	6	H		Ethiopia	351	351	192	192	200	200	177	177	174	174	222	222	264	264	244	244	266	266	214	214	224	224	286	286	282	282	282	282	216	216	267	267	210	210	345	345	200	200	296	296	302	302
726	726_3	HOR6334	Hordeum vulgare L. convar. vulgare var. hybernum Viborg	6	H		Ethiopia	351	351	192	192	200	200	177	177	174	174	234	234	264	264	244	244	264	264	214	214	224	224	286	286	282	282	282	282	216	216	267	267	204	204	336	336	200	200	296	296	302	302
727	727_1	HOR9920	Hordeum vulgare L. convar. vulgare var. latiglumatum Körn.	6	H		Ethiopia	351	351	192	192	202	202	177	177	174	174	254	254	264	264	246	246	266	266	214	214	224	224	286	286	272	272	282	282	210	210	267	267	210	210	336	336	200	200	296	296	302	302
728	728_1	HOR10304	Hordeum vulgare L. convar. vulgare var. subviolaceum Körn.	6	H		Ethiopia	351	351	192	192	200	200	177	177	174	174	230	230	264	264	246	246	266	266	214	214	224	224	286	286	282	282	282	282	216	216	267	267	210	210	345	345	200	200	296	296	302	302
729	729_1	HOR10305	Hordeum vulgare L. convar. vulgare var. hybernum Viborg	6	H		Ethiopia	351	351	201	201	200	200	177	177	174	174	242	242	264	264	246	246	256	256	-99999	-99999	224	224	286	286	274	274	282	282	216	216	267	267	204	204	351	351	200	200	296	296	294	294
730	730_1	HOR10306	Hordeum vulgare L. convar. vulgare var. hybernum Viborg	6	H		Ethiopia	351	351	192	192	218	218	177	177	174	174	202	202	264	264	246	246	264	264	214	214	224	224	290	290	282	282	282	282	216	216	267	267	210	210	336	336	204	204	296	296	302	302
731	731_2	HOR10307	Hordeum vulgare L. convar. vulgare var. hybernum Viborg	6	H		Ethiopia	261	261	201	201	218	218	174	174	174	174	202	202	264	264	246	246	266	266	214	214	224	224	286	286	272	272	276	276	210	210	267	267	207	207	345	345	204	204	300	300	294	294
732	732_2	HOR10308	Hordeum vulgare L. convar. vulgare var. hybernum Viborg	6	H		Ethiopia	351	351	192	192	200	200	177	177	174	174	214	214	264	264	246	246	266	266	214	214	224	224	286	286	276	276	282	282	216	216	267	267	210	210	339	345	200	200	296	296	294	294
733	733_2	HOR10310	Hordeum vulgare L. convar. vulgare var. nigripallidum Regel	6	H		Ethiopia	351	351	195	195	200	200	177	177	174	174	230	230	264	264	246	246	264	264	214	214	224	224	290	290	276	276	282	282	216	216	267	267	210	210	345	345	200	200	296	296	302	302
734	734_2	HOR10312	Hordeum vulgare L. convar. vulgare var. hybernum Viborg	6	H		Ethiopia	351	351	201	201	200	200	174	174	174	174	242	242	264	264	246	246	256	256	214	214	224	224	286	286	276	276	282	282	216	216	267	267	204	204	351	351	208	208	296	296	294	294
735	735_1	HOR10314	Hordeum vulgare L. convar. vulgare var. hybernum Viborg	6	H		Ethiopia	351	351	192	192	200	200	177	177	174	174	230	230	264	264	246	246	266	266	214	214	224	224	286	286	282	282	282	282	216	216	267	267	210	210	345	345	200	200	296	296	302	302
736	736_1	HOR10322	Hordeum vulgare L. convar. vulgare var. hybernum Viborg	6	H		Ethiopia	351	351	195	195	200	200	177	177	174	174	234	234	264	264	244	244	264	264	214	214	224	224	286	286	282	282	282	282	216	216	267	267	204	204	345	345	200	200	296	296	302	302
737	737_2	HOR10324	Hordeum vulgare L. convar. vulgare var. hybernum Viborg	6	H		Ethiopia	351	351	192	192	200	200	177	177	174	174	230	230	264	264	246	246	256	256	214	214	224	224	290	290	274	274	282	282	216	216	267	267	204	204	345	345	200	200	296	296	302	302
738	738_1	HOR10326	Hordeum vulgare L. convar. vulgare var. hybernum Viborg	6	H		Ethiopia	351	351	192	192	200	200	177	177	174	174	230	230	264	264	246	246	264	264	214	214	224	224	290	290	282	282	278	278	216	216	267	267	210	210	345	345	200	200	296	296	302	302
739	739_2	HOR10327	Hordeum vulgare L. convar. vulgare var. hybernum Viborg	6	H		Ethiopia	351	351	192	192	200	200	177	177	174	174	230	230	264	264	246	246	264	264	214	214	224	224	290	290	282	282	278	278	216	216	267	267	210	210	345	345	200	200	296	296	302	302
740	740_1	HOR10328	Hordeum vulgare L. convar. vulgare var. hybernum Viborg	6	H		Ethiopia	351	351	192	192	200	200	177	177	174	174	230	230	264	264	246	246	264	264	214	214	224	224	290	290	282	282	278	278	216	216	267	267	210	210	339	345	200	200	296	296	302	302
741	741_1	HOR10329	Hordeum vulgare L. convar. vulgare var. hybernum Viborg	6	H		Ethiopia	351	351	201	201	200	200	177	177	174	174	242	242	264	264	246	246	256	256	214	214	224	224	286	286	276	276	282	282	216	216	267	267	204	204	351	351	200	200	296	296	294	294
742	742_3	HOR10338	Hordeum vulgare L. convar. vulgare var. hybernum Viborg	6	H		Ethiopia	351	351	192	192	200	200	177	177	174	174	230	230	264	264	246	246	264	264	-99999	-99999	224	224	286	286	282	282	278	278	216	216	267	267	210	210	-99999	-99999	200	200	296	296	302	302
743	743_2	HOR10350	Hordeum vulgare L. convar. vulgare var. hybernum Viborg	6	H		Ethiopia	351	351	192	192	200	200	174	174	174	174	230	230	264	264	246	246	266	266	214	214	224	224	286	286	282	282	282	282	216	216	267	267	210	210	339	345	200	200	296	296	302	302
744	744_4	HOR10424	Hordeum vulgare L. convar. vulgare var. atrispicatum Körn.	6	H		Ethiopia	351	351	192	192	200	200	177	177	174	174	222	222	264	264	244	244	264	264	214	214	224	224	286	286	282	282	282	282	216	216	267	267	210	210	339	345	200	200	296	296	302	302
745	745_3	HOR10441	Hordeum vulgare L. convar. vulgare var. hybernum Viborg	6	H		Ethiopia	351	351	192	192	200	200	177	177	174	174	238	238	264	264	246	246	-99999	-99999	214	214	224	224	290	290	282	282	282	282	216	216	267	267	-99999	-99999	336	336	200	200	296	296	-99999	-99999
746	746_1	HOR10442	Hordeum vulgare L. convar. vulgare var. parallelum Körn.	6	H		Ethiopia	351	351	192	192	200	200	177	177	174	174	202	202	264	264	244	244	264	264	214	214	224	224	286	286	282	282	282	282	216	216	267	267	204	204	336	336	200	200	296	296	302	302
747	747_2	HOR10445	Hordeum vulgare L. convar. vulgare var. hybernum Viborg	6	H		Ethiopia	351	351	-99999	-99999	-99999	-99999	177	177	174	174	230	230	264	264	246	246	264	264	214	214	224	224	290	290	282	282	276	276	216	216	267	267	210	210	339	345	200	200	296	296	302	302
748	748_1	HOR10486	Hordeum vulgare L. convar. vulgare var. hybernum Viborg	6	H		Ethiopia	351	351	192	192	200	200	177	177	174	174	230	230	264	264	246	246	252	252	214	214	224	224	286	286	282	282	282	282	216	216	267	267	210	210	339	345	200	200	296	296	302	302
749	749_3	HOR10508	Hordeum vulgare L. convar. vulgare var. coerulescens Sér.	6	H		Ethiopia	351	351	192	192	200	200	177	177	174	174	230	230	264	264	246	246	264	264	214	214	224	224	290	290	276	276	282	282	216	216	267	267	210	210	339	345	200	200	296	296	302	302
750	750_2	HOR10509	Hordeum vulgare L. convar. vulgare var. nigripallidum Regel	6	H		Ethiopia	351	351	-99999	-99999	200	200	177	177	174	174	202	202	264	264	246	246	264	264	214	214	224	224	290	290	282	282	-99999	-99999	216	216	267	267	204	204	336	336	200	200	-99999	-99999	302	302
751	751_3	HOR10525	Hordeum vulgare L. convar. vulgare var. coerulescens Sér.	6	H		Ethiopia	351	351	192	192	-99999	-99999	177	177	174	174	218	218	264	264	246	246	256	256	214	214	224	224	292	292	282	282	282	282	216	216	267	267	210	210	339	345	200	200	296	296	302	302
752	752_1	HOR873	Hordeum vulgare L. convar. vulgare var. hybernum Viborg	6	H		France	351	351	201	201	200	204	177	177	165	165	226	226	264	264	244	244	256	256	214	214	224	224	290	290	274	274	278	278	216	216	267	267	213	213	336	336	208	208	300	300	302	302
753	753_3	HOR874	Hordeum vulgare L. convar. vulgare var. hybernum Viborg	6	H		France	351	351	201	201	200	200	174	174	165	165	250	250	264	264	246	246	264	264	214	214	224	224	286	286	274	274	278	278	219	219	267	267	207	207	336	336	208	208	300	300	302	302
754	754_4	HOR1132	Hordeum vulgare L. convar. vulgare var. hybernum Viborg	6	H		France	351	351	195	195	200	200	174	174	165	165	250	250	264	264	246	246	262	262	214	214	224	224	286	286	274	274	-99999	-99999	216	216	267	267	210	210	336	336	204	204	-99999	-99999	302	302
755	755_4	HOR1133	Hordeum vulgare L. convar. vulgare var. hybernum Viborg	6	H		France	261	261	201	201	202	202	174	174	165	165	230	230	264	264	246	246	256	256	214	214	224	224	286	286	274	274	276	276	216	216	267	267	216	216	336	336	208	208	300	300	302	302
756	756_2	HOR4284	Hordeum vulgare L. convar. vulgare var. hybernum Viborg	6	H		France	261	261	201	201	206	206	174	174	165	165	230	230	267	267	246	246	256	256	214	214	224	224	286	286	274	274	280	280	210	210	258	258	207	207	336	336	204	204	300	300	294	294
757	757_3	HOR10058	Hordeum vulgare L. convar. vulgare var. hybernum Viborg	6	H		France	261	261	201	201	200	200	174	174	165	165	238	238	264	264	246	246	262	262	212	212	228	228	284	284	274	274	276	276	210	210	267	267	207	207	336	336	208	208	300	300	294	294
758	758_4	HOR9614	Hordeum vulgare L. convar. vulgare var. hybernum Viborg	6	H		Georgia	351	351	201	201	200	200	174	174	171	171	202	202	267	267	244	244	254	254	214	214	224	224	284	284	282	282	282	282	213	213	264	264	210	210	-99999	-99999	-99999	-99999	296	296	302	302
759	759_2	HOR9615	Hordeum vulgare L. convar. vulgare var. subviolaceum Körn.	6	H		Georgia	351	351	201	201	220	220	177	177	174	174	258	258	267	267	244	244	256	256	214	214	224	224	284	284	286	286	278	278	213	213	264	264	210	210	351	351	204	204	296	296	302	302
760	760_2	HOR9621	Hordeum vulgare L. convar. vulgare var. hybernum Viborg	6	H		Georgia	351	351	204	204	214	214	174	174	174	174	202	202	267	267	244	244	254	254	214	214	224	224	284	284	282	282	278	278	213	213	264	264	213	213	351	351	204	204	296	296	302	302
761	761_2	HOR9622	Hordeum vulgare L. convar. vulgare var. hybernum Viborg	6	H		Georgia	351	351	210	210	220	220	174	174	174	174	246	246	267	267	244	244	254	254	214	214	224	224	284	284	282	282	278	278	213	213	264	264	210	210	351	351	204	204	296	296	302	302
762	762_2	HOR9623	Hordeum vulgare L. convar. vulgare var. subviolaceum Körn.	6	H		Georgia	351	351	210	210	218	218	174	174	168	174	238	246	267	267	244	244	254	254	214	214	224	224	284	284	282	282	282	282	216	216	264	264	213	213	351	351	204	204	296	296	302	302
763	763_2	HOR9625	Hordeum vulgare L. convar. vulgare var. subviolaceum Körn.	6	H		Georgia	351	351	210	210	218	218	174	174	174	174	254	254	267	267	244	244	254	254	214	214	224	224	284	284	282	282	282	282	213	213	264	264	213	213	351	351	204	204	296	296	302	302
764	764_1	HOR9629	Hordeum vulgare L. convar. vulgare var. subviolaceum Körn.	6	H		Georgia	351	351	210	210	218	218	174	174	174	174	246	246	267	267	244	244	254	254	214	214	224	224	284	284	282	282	282	282	216	216	264	264	213	213	351	351	204	204	296	296	302	302
765	765_2	HOR9868	Hordeum vulgare L. convar. vulgare var. subviolaceum Körn.	6	H		Georgia	351	351	210	210	220	220	174	174	174	174	254	254	267	267	244	244	256	256	214	214	224	224	284	284	282	282	282	282	213	213	264	264	213	213	351	351	204	204	296	296	302	302
766	766_2	HOR10358	Hordeum vulgare L. convar. vulgare var. subviolaceum Körn.	6	H		Georgia	351	351	201	201	220	220	174	174	174	174	246	246	267	267	244	244	256	256	214	214	224	224	284	284	286	286	278	278	213	213	264	264	210	210	351	351	204	204	296	296	302	302
767	767_4	HOR10359	Hordeum vulgare L. convar. vulgare var. hybernum Viborg	6	H		Georgia	351	351	210	210	218	218	174	174	174	174	234	234	264	264	244	244	262	262	214	214	224	224	284	284	284	284	282	282	213	213	264	264	213	213	351	351	204	204	296	296	302	302
768	768_2	HOR10360	Hordeum vulgare L. convar. vulgare var. coerulescens Sér.	6	H		Georgia	351	351	210	210	220	220	174	174	174	174	246	246	267	267	244	244	254	254	214	214	224	224	284	284	282	282	282	282	216	216	264	264	213	213	351	351	204	204	296	296	302	302
769	769_2	HOR10361	Hordeum vulgare L. convar. vulgare var. hybernum Viborg	6	H		Georgia	351	351	201	201	220	220	174	174	174	174	246	246	267	267	244	244	256	256	214	214	224	224	284	284	286	286	278	278	213	213	264	264	210	210	351	351	204	204	296	296	302	302
770	770_1	HOR10467	Hordeum vulgare L. convar. vulgare var. subviolaceum Körn.	6	H		Georgia	351	351	210	210	218	218	174	174	174	174	254	254	267	267	244	244	254	254	214	214	224	224	284	284	282	282	282	282	216	216	264	264	213	213	351	351	204	204	296	296	302	302
771	771_1	HOR10546	Hordeum vulgare L. convar. vulgare var. hybernum Viborg	6	H		Georgia	261	261	-99999	-99999	200	200	174	174	174	174	254	254	264	264	244	244	254	254	212	212	224	224	284	284	-99999	-99999	-99999	-99999	213	213	264	264	213	213	351	351	212	212	-99999	-99999	302	302
772	772_1	HOR10644	Hordeum vulgare L. convar. vulgare var. hybernum Viborg	6	H		Georgia	261	261	201	201	202	202	183	183	174	174	238	238	264	264	246	246	264	264	212	212	224	224	284	284	274	274	280	280	210	210	258	258	210	210	351	351	204	220	296	296	294	294
773	773_2	HOR10705	Hordeum vulgare L. convar. vulgare var. hybernum Viborg	6	H		Georgia	261	261	195	195	200	200	174	174	174	174	238	238	264	264	246	246	254	254	212	212	224	224	284	284	282	282	276	276	216	216	264	264	210	210	336	336	208	208	296	296	304	304
774	774_3	HOR10706	Hordeum vulgare L. convar. vulgare var. hybernum Viborg	6	H		Georgia	294	294	201	201	220	220	177	177	165	165	250	250	264	264	246	246	264	264	214	214	228	228	284	284	272	272	280	280	210	210	264	264	207	207	351	351	208	208	296	296	304	304
775	775_1	HOR10742	Hordeum vulgare L. convar. vulgare var. rikotense Regel	6	H		Georgia	261	261	195	195	200	200	174	174	168	168	202	202	264	264	244	244	256	256	212	212	228	228	290	290	-99999	-99999	278	278	213	213	267	267	210	210	351	351	212	212	296	296	302	302
776	776_2	HOR10747	Hordeum vulgare L. convar. vulgare var. hybernum Viborg	6	H		Georgia	351	351	195	195	198	198	174	174	174	174	262	262	264	264	246	246	264	264	214	214	228	228	284	284	272	272	282	282	210	210	264	264	207	207	351	351	208	208	300	300	294	294
777	777_1	HOR10748	Hordeum vulgare L. convar. vulgare var. subviolaceum Körn.	6	H		Georgia	351	351	210	210	214	214	177	177	174	174	254	254	267	267	244	244	262	262	214	214	224	224	284	284	282	282	282	282	213	213	264	264	210	210	351	351	208	208	296	296	302	302
778	778_2	HOR10750	Hordeum vulgare L. convar. vulgare var. hybernum Viborg	6	H		Georgia	351	351	210	210	214	214	174	174	174	174	254	254	267	267	244	244	254	254	214	214	224	224	284	284	282	282	282	282	213	213	264	264	210	210	351	351	208	208	296	296	302	302
779	779_2	HOR10751	Hordeum vulgare L. convar. vulgare var. subviolaceum Körn.	6	H		Georgia	351	351	210	210	218	218	174	174	174	174	254	254	267	267	244	244	254	254	214	214	224	224	284	284	282	282	282	282	213	213	264	264	210	210	351	351	208	208	296	296	302	302
780	780_2	HOR10752	Hordeum vulgare L. convar. vulgare var. hybernum Viborg	6	H		Georgia	351	351	-99999	-99999	214	214	174	174	174	174	254	254	267	267	244	244	254	254	-99999	-99999	224	224	284	284	282	282	-99999	-99999	213	213	264	264	213	213	351	351	208	208	296	296	302	302
781	781_1	HOR10753	Hordeum vulgare L. convar. vulgare var. subviolaceum Körn.	6	H		Georgia	351	351	210	210	214	214	174	174	174	174	254	254	267	267	244	244	254	254	214	214	224	224	284	284	-99999	-99999	282	282	213	213	264	264	210	210	351	351	208	208	296	296	302	302
782	782_1	HOR10754	Hordeum vulgare L. convar. vulgare var. hybernum Viborg	6	H		Georgia	351	351	210	210	218	218	174	174	174	174	254	254	267	267	244	244	264	264	214	214	224	224	284	284	-99999	-99999	278	278	210	210	264	264	210	210	351	351	208	208	296	296	302	302
783	783_2	HOR10755	Hordeum vulgare L. convar. vulgare var. subviolaceum Körn.	6	H		Georgia	351	351	210	210	214	214	174	174	174	174	254	254	267	267	244	244	264	264	214	214	224	224	284	284	282	282	282	282	213	213	264	264	210	210	351	351	208	208	296	296	302	302
784	784_1	HOR10756	Hordeum vulgare L. convar. vulgare var. hybernum Viborg	6	H		Georgia	351	351	210	210	214	214	174	174	174	174	254	254	267	267	244	244	264	264	214	214	224	224	284	284	282	282	282	282	213	213	264	264	213	213	351	351	208	208	296	296	302	302
785	785_3	HOR10757	Hordeum vulgare L. convar. vulgare var. subviolaceum Körn.	6	H		Georgia	351	351	210	210	218	218	174	174	174	174	254	254	267	267	244	244	254	254	214	214	224	224	284	284	-99999	-99999	282	282	213	213	264	264	210	210	351	351	208	208	296	296	302	302
786	786_1	HOR10849	Hordeum vulgare L. convar. vulgare var. hybernum Viborg	6	H		Georgia	261	261	201	201	200	200	174	174	174	174	238	238	264	264	246	246	264	264	216	216	224	224	284	284	274	274	276	276	216	216	258	258	210	210	351	351	208	208	296	296	302	302
787	787_2	HOR10876	Hordeum vulgare L. convar. vulgare var. hybernum Viborg	6	H		Georgia	351	351	201	201	200	200	174	174	174	174	262	262	264	264	244	244	264	264	212	212	228	228	284	284	272	272	274	274	216	216	258	258	210	210	351	351	204	204	296	296	300	300
788	788_1	HOR10885	Hordeum vulgare L. convar. vulgare var. hybernum Viborg	6	H		Georgia	351	351	195	195	202	202	177	177	171	171	222	222	264	264	244	244	254	254	214	214	228	228	286	286	282	282	282	282	216	216	258	258	210	210	351	351	204	204	296	296	304	304
789	789_1	HOR10969	Hordeum vulgare L. convar. vulgare var. densum Sér.	6	H		Georgia	261	261	201	201	200	200	174	174	174	174	270	270	264	264	246	246	264	264	212	212	224	224	284	284	276	276	280	280	216	216	258	258	210	210	351	351	212	212	296	296	294	294
790	790_1	HOR11197	Hordeum vulgare L. convar. vulgare var. hybernum Viborg	6	H		Georgia	294	294	195	195	220	220	177	177	168	168	202	202	264	264	244	244	256	256	214	214	228	228	290	290	274	274	278	278	213	213	264	264	210	210	351	351	208	208	296	296	302	302
791	791_1	HOR105	Hordeum vulgare L. convar. vulgare var. hybernum Viborg	6	H		Germany	261	261	195	195	190	190	174	174	174	174	270	270	267	267	244	244	262	262	-99999	-99999	228	228	284	284	274	274	278	278	210	210	267	267	210	210	336	336	216	216	300	300	294	294
792	792_1	HOR335	Hordeum vulgare L. convar. vulgare var. hybernum Viborg	6	H		Germany	351	351	195	195	218	218	174	174	165	165	230	230	264	264	246	246	266	266	212	212	224	224	286	286	282	282	278	278	210	210	267	267	207	207	345	345	208	208	300	300	302	302
793	793_3	HOR1424	Hordeum vulgare L. convar. vulgare var. hybernum Viborg	6	H		Germany	261	261	195	195	200	200	174	174	174	174	266	266	267	267	246	246	264	264	212	212	228	228	284	284	272	272	276	276	210	210	267	267	210	210	336	336	208	208	300	300	294	294
794	794_2	HOR1868	Hordeum vulgare L. convar. vulgare var. hybernum Viborg	6	H		Germany	261	261	201	201	200	200	174	174	174	174	238	238	264	264	246	246	264	264	216	216	224	224	284	284	272	272	276	276	210	210	258	258	210	210	351	351	208	208	300	300	302	302
796	796_2	HOR10994	Hordeum vulgare L. convar. vulgare var. hybernum Viborg	6	H		Germany	261	261	195	195	200	200	177	177	165	165	258	258	264	264	244	244	264	264	212	212	228	228	284	284	274	274	276	276	210	210	267	267	210	210	336	336	212	212	300	300	294	294
797	797_1	HOR13880	Hordeum vulgare L. convar. vulgare var. densum Sér.	6	H		Germany	261	261	195	195	200	200	174	174	174	174	226	226	264	264	246	246	264	264	212	212	228	228	284	284	274	274	278	278	210	210	267	267	210	210	336	336	208	208	300	300	302	302
798	798_1	HOR14239	Hordeum vulgare L. convar. vulgare var. hybernum Viborg	6	H		Germany	261	261	201	201	200	200	177	177	174	174	250	250	267	267	244	244	264	264	212	214	224	224	286	286	272	272	276	276	216	216	267	267	207	207	336	336	208	208	296	296	302	302
799	799_2	HOR676	Hordeum vulgare L. convar. vulgare var. hybernum Viborg	6	H		Greece	351	351	201	201	200	200	174	174	165	165	230	230	264	264	244	244	256	256	214	214	224	224	290	290	274	274	276	276	216	216	267	267	210	210	336	336	208	208	296	296	304	304
800	800_2	HOR685	Hordeum vulgare L. convar. vulgare var. hybernum Viborg	6	H		Greece	351	351	201	201	218	218	177	177	165	165	230	230	264	264	246	246	266	266	212	212	224	224	286	286	274	274	276	276	216	216	267	267	216	216	336	336	208	208	300	300	302	302
801	801_4	HOR713	Hordeum vulgare L. convar. vulgare var. hybernum Viborg	6	H		Greece	351	351	201	201	202	202	174	174	165	165	222	222	264	264	246	246	266	266	214	214	224	224	284	284	274	274	278	278	216	216	267	267	213	213	336	336	212	212	300	300	304	304
802	802_2	HOR715	Hordeum vulgare L. convar. vulgare var. hybernum Viborg	6	H		Greece	351	351	201	201	-99999	-99999	174	174	165	165	230	230	264	264	246	246	264	264	214	214	224	224	286	286	274	274	278	278	216	216	267	267	216	216	336	336	204	204	300	300	294	294
803	803_3	HOR724	Hordeum vulgare L. convar. vulgare var. hybernum Viborg	6	H		Greece	261	261	201	201	200	200	174	174	165	165	250	250	264	264	246	246	266	266	212	212	224	224	286	286	274	274	278	278	216	216	267	267	210	210	336	336	208	208	296	296	302	302
804	804_3	HOR737	Hordeum vulgare L. convar. vulgare var. hybernum Viborg	6	H		Greece	351	351	201	201	206	206	174	174	165	165	230	230	261	261	246	246	266	266	212	212	224	224	286	286	274	274	280	280	216	216	267	267	213	213	334	334	208	208	296	296	294	294
805	805_2	HOR743	Hordeum vulgare L. convar. vulgare var. hybernum Viborg	6	H		Greece	351	351	201	201	200	200	174	174	165	165	262	262	264	267	246	246	262	262	216	216	224	224	286	286	274	274	278	278	216	216	267	267	213	213	-99999	-99999	204	220	296	296	302	302
806	806_3	HOR745	Hordeum vulgare L. convar. vulgare var. hybernum Viborg	6	H		Greece	261	261	201	201	200	206	174	174	174	174	238	238	264	264	246	246	250	264	212	212	228	228	286	286	274	274	282	282	210	210	264	264	213	213	336	336	208	208	300	300	304	304
807	807_4	HOR746	Hordeum vulgare L. convar. vulgare var. hybernum Viborg	6	H		Greece	261	261	192	192	200	200	174	174	174	174	222	222	-99999	-99999	246	246	264	264	212	212	228	228	284	284	274	274	278	278	210	210	264	264	213	213	336	336	212	212	296	296	294	294
808	808_2	HOR747	Hordeum vulgare L. convar. vulgare var. hybernum Viborg	6	H		Greece	261	261	201	201	206	206	180	180	165	165	226	226	264	264	-99999	-99999	264	264	212	212	224	224	284	284	274	274	282	282	210	210	264	264	213	213	345	345	212	212	296	296	294	294
809	809_2	HOR752	Hordeum vulgare L. convar. vulgare var. hybernum Viborg	6	H		Greece	351	351	201	201	200	200	180	180	174	174	230	230	264	264	246	246	254	254	212	212	228	228	284	284	274	274	278	278	210	210	267	267	210	210	336	336	204	204	296	296	304	304
810	810_1	HOR759	Hordeum vulgare L. convar. vulgare var. hybernum Viborg	6	H		Greece	261	261	201	201	200	200	174	174	165	165	218	218	264	264	246	246	254	254	212	212	228	228	284	284	274	274	280	280	216	216	264	264	207	207	336	336	212	212	296	296	294	294
811	811_4	HOR761	Hordeum vulgare L. convar. vulgare var. parallelum Körn.	6	H		Greece	327	327	201	201	202	206	165	165	165	165	218	218	264	264	246	246	254	254	212	212	224	224	286	286	274	274	278	278	210	210	267	267	207	207	345	345	196	196	300	300	294	294
812	812_2	HOR762	Hordeum vulgare L. convar. vulgare var. hybernum Viborg	6	H		Greece	261	261	201	201	202	206	177	177	165	165	230	230	264	264	-99999	-99999	262	262	212	212	224	224	286	286	274	274	278	278	216	216	267	267	207	207	336	336	216	216	300	300	294	294
813	813_2	HOR763	Hordeum vulgare L. convar. vulgare var. hybernum Viborg	6	H		Greece	351	351	201	201	202	206	177	177	165	165	230	230	264	264	246	246	264	264	212	212	224	224	286	286	274	274	278	278	210	210	267	267	207	207	345	345	208	208	300	300	294	294
814	814_2	HOR764	Hordeum vulgare L. convar. vulgare var. hybernum Viborg	6	H		Greece	351	351	201	201	202	206	177	177	165	165	230	230	264	264	246	246	264	264	212	212	224	224	286	286	274	274	278	278	210	210	267	267	207	207	345	345	208	208	300	300	294	294
815	815_3	HOR765	Hordeum vulgare L. convar. vulgare var. hybernum Viborg	6	H		Greece	261	261	201	201	200	206	174	174	174	174	238	238	264	264	246	246	264	264	212	212	228	228	284	284	274	274	282	282	210	210	264	264	210	210	336	336	212	212	296	296	294	294
816	816_2	HOR766	Hordeum vulgare L. convar. vulgare var. hybernum Viborg	6	H		Greece	261	261	201	201	200	200	174	174	174	174	238	238	264	264	246	246	264	264	212	212	228	228	284	284	274	274	278	278	210	210	264	264	210	210	336	336	204	204	296	296	294	294
817	817_3	HOR768	Hordeum vulgare L. convar. vulgare var. hybernum Viborg	6	H		Greece	261	261	201	201	206	206	180	180	174	174	230	230	261	261	246	246	264	264	212	212	228	228	284	284	274	274	282	282	210	210	264	264	210	210	-99999	-99999	212	212	296	296	294	294
818	818_2	HOR771	Hordeum vulgare L. convar. vulgare var. hybernum Viborg	6	H		Greece	261	261	201	201	200	200	174	174	165	165	262	262	264	264	246	246	266	266	216	216	224	224	284	284	274	274	276	276	210	210	267	267	207	207	351	351	208	208	300	300	294	294
819	819_1	HOR854	Hordeum vulgare L. convar. vulgare var. parallelum Körn.	6	H		Greece	351	351	201	201	214	214	174	174	174	174	246	246	264	264	246	246	262	262	214	214	228	228	288	288	274	274	278	278	210	210	267	267	213	213	345	345	208	216	300	300	302	302
820	820_1	HOR857	Hordeum vulgare L. convar. vulgare var. parallelum Körn.	6	H		Greece	351	351	201	201	214	214	174	174	174	174	246	246	264	264	246	246	262	262	214	214	228	228	288	288	274	274	278	278	210	210	267	267	213	213	345	345	208	208	300	300	302	302
821	821_1	HOR858	Hordeum vulgare L. convar. vulgare var. hybernum Viborg	6	H		Greece	351	351	201	201	200	200	174	174	165	165	230	230	264	264	246	246	266	266	214	214	224	224	286	286	274	274	276	276	216	216	267	267	210	210	336	336	208	208	296	296	302	302
822	822_2	HOR859	Hordeum vulgare L. convar. vulgare var. hybernum Viborg	6	H		Greece	351	351	201	201	202	202	174	174	165	165	230	230	264	264	246	246	266	266	214	214	224	224	286	286	274	274	280	280	219	219	267	267	213	213	345	345	204	204	300	300	304	304
823	823_2	HOR865	Hordeum vulgare L. convar. vulgare var. hybernum Viborg	6	H		Greece	351	351	201	201	206	206	174	174	165	165	230	230	264	264	246	246	262	262	212	212	224	224	286	286	274	274	278	278	219	219	267	267	210	210	336	336	208	208	288	288	304	304
824	824_1	HOR880	Hordeum vulgare L. convar. vulgare var. densum Sér.	6	H		Greece	351	351	201	201	216	216	162	162	165	165	230	230	264	264	246	246	262	262	212	212	224	224	284	284	274	274	278	278	210	210	264	264	210	210	336	336	208	208	300	300	302	302
825	825_1	HOR936	Hordeum vulgare L. convar. vulgare var. hybernum Viborg	6	H		Greece	261	261	201	201	200	200	174	174	174	174	218	218	264	264	246	246	254	254	212	212	228	228	284	284	274	274	278	278	210	210	264	264	210	210	-99999	-99999	208	208	296	296	294	294
826	826_1	HOR940	Hordeum vulgare L. convar. vulgare var. densum Sér.	6	H		Greece	351	351	201	201	216	216	174	174	165	165	230	230	264	264	246	246	262	262	212	212	224	224	284	284	274	274	278	278	210	210	264	264	210	210	336	336	208	208	300	300	302	302
827	827_2	HOR966	Hordeum vulgare L. convar. vulgare var. hybernum Viborg	6	H		Greece	261	261	195	195	200	204	174	174	165	165	230	230	264	264	246	246	264	264	212	212	228	228	284	284	274	274	278	278	216	216	264	264	210	210	336	336	204	204	296	296	294	294
828	828_1	HOR967	Hordeum vulgare L. convar. vulgare var. hybernum Viborg	6	H		Greece	261	261	201	201	206	206	174	174	165	165	230	230	264	264	246	246	262	262	212	212	224	224	286	286	274	274	280	280	210	210	264	264	210	210	336	336	212	212	296	296	294	294
829	829_1	HOR1142	Hordeum vulgare L. convar. vulgare var. hybernum Viborg	6	H		Greece	351	351	201	201	198	198	174	174	165	165	250	250	-99999	-99999	246	246	266	266	212	212	224	224	286	286	274	274	276	276	216	216	267	267	210	210	-99999	-99999	212	212	296	296	302	302
830	830_1	HOR1149	Hordeum vulgare L. convar. vulgare var. hybernum Viborg	6	H		Greece	351	351	201	201	200	200	174	174	165	165	254	254	264	264	244	244	268	268	212	212	228	228	286	286	274	274	276	276	216	216	267	267	210	210	345	345	212	212	296	296	302	302
831	831_3	HOR1157	Hordeum vulgare L. convar. vulgare var. hybernum Viborg	6	H		Greece	351	351	201	201	202	202	174	174	165	165	230	230	-99999	-99999	246	246	264	264	212	212	224	224	286	286	274	274	280	280	216	216	258	258	207	207	-99999	-99999	208	208	300	300	302	302
832	832_3	HOR1232	Hordeum vulgare L. convar. vulgare var. hybernum Viborg	6	H		Greece	261	261	201	201	200	200	174	174	174	174	230	230	267	267	246	246	264	264	212	212	228	228	284	284	274	274	282	282	210	210	267	267	210	210	336	336	212	212	296	296	294	294
833	833_1	HOR1233	Hordeum vulgare L. convar. vulgare var. hybernum Viborg	6	H		Greece	261	261	198	198	206	206	174	174	165	165	230	230	264	264	246	246	264	264	212	212	224	224	292	292	274	274	278	278	210	210	267	267	210	210	336	336	208	208	296	296	302	302
834	834_2	HOR1235	Hordeum vulgare L. convar. vulgare var. hybernum Viborg	6	H		Greece	351	351	201	201	202	202	174	174	165	165	262	262	264	264	246	246	262	262	214	214	228	228	292	292	274	274	276	276	216	216	258	258	210	210	336	336	204	204	300	300	302	302
835	835_1	HOR1236	Hordeum vulgare L. convar. vulgare var. hybernum Viborg	6	H		Greece	351	351	201	201	198	198	174	174	162	162	234	234	264	264	246	246	266	266	212	212	224	224	286	286	274	274	278	278	216	216	267	267	213	213	345	345	208	208	296	296	302	302
836	836_2	HOR1245	Hordeum vulgare L. convar. vulgare var. hybernum Viborg	6	H		Greece	261	261	201	201	226	226	171	171	165	165	218	218	264	264	246	246	254	254	212	212	228	228	284	284	274	274	282	282	210	210	264	264	210	210	336	336	212	220	296	296	294	294
837	837_3	HOR1246	Hordeum vulgare L. convar. vulgare var. hybernum Viborg	6	H		Greece	261	261	201	201	202	202	174	174	174	174	230	230	252	252	246	246	254	254	216	216	224	224	284	284	274	274	282	282	210	210	267	267	210	210	-99999	-99999	216	216	296	296	294	294
838	838_2	HOR1247	Hordeum vulgare L. convar. vulgare var. hybernum Viborg	6	H		Greece	351	351	201	201	206	206	174	174	165	165	230	230	-99999	-99999	246	246	264	264	212	212	224	224	284	284	274	274	282	282	210	210	264	264	210	210	-99999	-99999	212	212	296	296	294	294
839	839_2	HOR1258	Hordeum vulgare L. convar. vulgare var. densum Sér.	6	H		Greece	351	351	201	201	214	214	174	174	174	174	262	262	264	264	246	246	262	262	214	214	228	228	288	288	274	274	278	278	216	216	267	267	213	213	334	334	208	208	300	300	302	302
840	840_3	HOR1279	Hordeum vulgare L. convar. vulgare var. hybernum Viborg	6	H		Greece	261	261	201	201	200	200	174	174	165	165	238	238	-99999	-99999	246	246	254	254	212	212	224	224	284	284	274	274	278	278	210	210	264	264	210	210	336	336	212	212	296	296	294	294
841	841_3	HOR1286	Hordeum vulgare L. convar. vulgare var. hybernum Viborg	6	H		Greece	-99999	-99999	201	201	202	202	174	174	-99999	-99999	-99999	-99999	264	264	246	246	264	264	212	212	224	224	286	286	274	274	280	280	216	216	264	264	210	210	336	336	208	220	296	296	294	294
842	842_2	HOR1387	Hordeum vulgare L. convar. vulgare var. hybernum Viborg	6	H		Greece	261	261	201	201	200	200	174	174	162	162	190	190	264	264	246	246	262	262	212	212	228	228	284	284	274	274	280	280	210	210	264	264	210	210	336	336	212	212	292	292	294	294
843	843_3	BCC1563	Hordeum vulgare L. convar. vulgare var. hybernum Viborg	6	H		Greece	351	351	195	201	200	200	165	165	174	174	214	214	264	264	244	244	256	256	214	214	224	224	288	288	274	274	276	276	216	216	-99999	-99999	210	210	336	336	208	208	296	296	304	304
844	844_1	BCC1564	Hordeum vulgare L. convar. vulgare var. subviolaceum Körn.	6	H		Greece	351	351	201	201	202	202	-99999	-99999	-99999	-99999	-99999	-99999	-99999	-99999	246	246	266	266	212	212	224	224	286	286	274	274	276	276	210	210	-99999	-99999	213	213	-99999	-99999	208	208	300	300	302	302
845	845_3	HOR1860	Hordeum vulgare L. convar. vulgare var. hybernum Viborg	6	H		Greece	351	351	201	201	202	206	171	171	165	165	222	222	261	261	246	246	262	262	212	212	224	224	286	286	274	274	276	276	219	219	258	258	210	210	334	334	208	208	288	288	302	302
846	846_2	HOR2510	Hordeum vulgare L. convar. vulgare var. nigripallidum Regel	6	H		Greece	336	336	195	195	206	206	183	183	174	174	242	242	-99999	-99999	244	244	266	266	214	214	228	228	286	286	274	274	282	282	216	216	273	273	210	210	-99999	-99999	200	200	296	296	300	300
848	848_3	HOR6954	Hordeum vulgare L. convar. vulgare var. parallelum Körn.	6	H		Greece	351	351	-99999	-99999	202	202	174	174	174	174	262	262	264	264	244	244	-99999	-99999	214	214	228	228	290	290	274	274	-99999	-99999	216	216	267	267	213	213	345	345	208	208	-99999	-99999	-99999	-99999
849	849_2	HOR2502	Hordeum vulgare L. convar. vulgare var. hybernum Viborg	6	H		Iran	276	276	195	195	200	200	177	177	174	174	258	258	258	258	246	246	256	256	214	214	228	228	286	286	276	276	280	280	213	213	273	273	207	207	336	336	212	212	296	296	302	302
850	850_3	HOR2768	Hordeum vulgare L. convar. vulgare var. hybernum Viborg	6	H		Iran	351	351	195	195	200	200	177	177	174	174	258	258	258	258	244	244	264	264	212	212	220	220	290	290	274	274	280	280	216	216	267	267	210	210	336	336	200	200	296	296	300	300
851	851_4	HOR2769	Hordeum vulgare L. convar. vulgare var. hybernum Viborg	6	H		Iran	351	351	195	195	200	200	177	177	168	168	202	202	267	267	246	246	254	254	214	214	224	224	284	284	274	274	280	280	213	213	273	273	207	207	324	324	208	208	296	296	294	294
852	852_4	HOR2772	Hordeum vulgare L. convar. vulgare var. hybernum Viborg	6	H		Iran	351	351	195	195	200	200	177	177	174	174	258	258	258	258	244	244	266	266	214	214	220	220	290	290	274	274	280	280	216	216	267	267	210	210	336	336	200	200	296	296	300	300
853	853_4	HOR2773	Hordeum vulgare L. convar. vulgare var. parallelum Körn.	6	H		Iran	336	336	195	195	198	198	177	177	174	174	258	258	264	264	244	244	266	266	214	214	228	228	290	290	274	274	282	282	216	216	267	267	210	210	336	336	200	200	296	296	300	300
854	854_2	HOR2787	Hordeum vulgare L. convar. vulgare var. hybernum Viborg	6	H		Iran	351	351	-99999	-99999	200	200	177	177	174	174	258	258	258	258	244	244	266	266	214	214	220	220	290	290	274	274	280	280	216	216	267	267	210	210	336	336	200	200	296	296	300	300
855	855_4	HOR2788	Hordeum vulgare L. convar. vulgare var. hybernum Viborg	6	H		Iran	351	351	-99999	-99999	200	200	177	177	174	174	258	258	258	258	244	244	266	266	214	214	220	220	290	290	274	274	-99999	-99999	216	216	267	267	210	210	336	336	200	200	-99999	-99999	300	300
856	856_3	HOR2798	Hordeum vulgare L. convar. vulgare var. hybernum Viborg	6	H		Iran	276	276	195	195	200	200	177	177	174	174	246	258	258	258	246	246	256	256	214	214	228	228	286	286	276	276	280	280	216	216	273	273	210	210	324	324	208	208	296	296	302	302
857	857_1	HOR2799	Hordeum vulgare L. convar. vulgare var. hybernum Viborg	6	H		Iran	351	351	195	195	200	200	174	174	174	174	206	206	267	267	244	244	258	258	214	214	228	228	290	290	274	274	278	278	213	213	261	261	207	207	345	345	212	212	288	288	300	300
858	858_2	HOR2800	Hordeum vulgare L. convar. vulgare var. hybernum Viborg	6	H		Iran	276	276	195	195	200	200	180	180	174	174	258	258	258	258	246	246	256	256	214	214	224	224	286	286	276	276	280	280	213	213	267	267	207	207	345	345	208	208	288	288	302	302
859	859_2	HOR2801	Hordeum vulgare L. convar. vulgare var. hybernum Viborg	6	H		Iran	351	351	195	195	200	200	165	177	174	174	202	202	267	267	246	246	258	258	214	214	228	228	290	290	274	274	280	280	213	213	261	261	210	210	324	324	200	200	296	296	300	300
860	860_3	HOR2805	Hordeum vulgare L. convar. vulgare var. hybernum Viborg	6	H		Iran	261	261	201	201	200	200	177	177	165	165	202	202	267	267	246	246	264	264	214	214	228	228	288	288	274	274	282	282	213	213	264	264	207	207	336	336	204	208	296	296	304	304
861	861_1	HOR2806	Hordeum vulgare L. convar. vulgare var. hybernum Viborg	6	H		Iran	351	351	195	195	200	200	177	177	174	174	202	202	267	267	246	246	266	266	214	214	228	228	288	288	274	274	282	282	213	213	264	264	207	207	324	324	204	204	288	288	300	300
862	862_3	HOR2811	Hordeum vulgare L. convar. vulgare var. hybernum Viborg	6	H		Iran	351	351	195	195	210	210	180	180	174	174	202	202	267	267	246	246	268	268	214	214	224	224	290	290	274	274	282	282	213	213	264	264	207	207	324	324	208	208	296	296	302	302
863	863_4	HOR2812	Hordeum vulgare L. convar. vulgare var. hybernum Viborg	6	H		Iran	351	351	195	195	216	216	177	177	174	174	202	202	267	267	246	246	252	252	214	214	224	224	284	284	274	274	282	282	213	213	273	273	207	207	324	324	208	208	296	296	294	294
864	864_1	HOR2813	Hordeum vulgare L. convar. vulgare var. hybernum Viborg	6	H		Iran	351	351	192	192	200	200	177	177	174	174	230	230	264	264	246	246	254	254	214	214	224	224	286	286	276	276	278	278	216	216	267	267	204	204	336	336	200	200	296	296	302	302
865	865_3	HOR2814	Hordeum vulgare L. convar. vulgare var. hybernum Viborg	6	H		Iran	351	351	195	210	200	200	177	177	174	174	262	262	258	267	246	246	276	276	214	214	228	228	286	290	274	274	282	282	213	213	258	258	210	210	324	324	204	204	296	296	302	302
866	866_1	HOR2835	Hordeum vulgare L. convar. vulgare var. hybernum Viborg	6	H		Iran	261	261	195	195	210	210	174	174	-99999	-99999	-99999	-99999	264	264	246	246	272	272	214	214	228	228	290	290	274	274	282	282	213	213	270	270	207	207	-99999	-99999	208	208	296	296	302	302
867	867_2	HOR2837	Hordeum vulgare L. convar. vulgare var. hybernum Viborg	6	H		Iran	276	276	195	195	200	200	177	177	174	174	258	258	258	258	246	246	256	256	214	214	228	228	286	286	276	276	280	280	213	213	273	273	207	207	-99999	-99999	212	212	296	296	302	302
868	868_2	HOR2839	Hordeum vulgare L. convar. vulgare var. nigrum (Willd.) Link	6	H		Iran	336	336	195	195	200	200	177	177	174	174	202	202	-99999	-99999	244	244	256	256	214	214	228	228	286	286	274	274	280	280	216	216	267	267	210	210	-99999	-99999	212	212	296	296	300	300
869	869_4	HOR2846	Hordeum vulgare L. convar. vulgare var. hybernum Viborg	6	H		Iran	351	351	195	195	200	200	180	180	174	174	202	202	264	264	244	244	264	264	214	214	224	224	290	290	274	274	278	278	213	213	258	258	210	210	-99999	-99999	204	204	296	296	304	304
870	870_2	HOR2850	Hordeum vulgare L. convar. vulgare var. hybernum Viborg	6	H		Iran	351	351	195	195	200	200	177	177	174	174	202	202	264	264	244	244	262	262	214	214	228	228	290	290	274	274	282	282	213	213	258	258	207	207	345	345	200	200	296	296	302	302
871	871_1	HOR2854	Hordeum vulgare L. convar. vulgare var. hybernum Viborg	6	H		Iran	351	351	195	195	190	190	180	180	174	174	202	202	264	264	244	244	260	260	214	214	224	224	290	290	274	274	282	282	213	213	258	258	210	210	345	345	204	204	296	296	302	302
872	872_1	HOR2866	Hordeum vulgare L. convar. vulgare var. densum Sér.	6	H		Iran	336	336	210	210	200	200	177	177	165	165	202	202	258	258	246	246	266	266	214	214	228	228	286	286	276	276	278	278	213	213	264	264	210	210	351	351	208	208	288	288	300	300
873	873_1	HOR2880	Hordeum vulgare L. convar. vulgare var. hybernum Viborg	6	H		Iran	336	336	210	210	200	200	177	177	165	165	246	246	267	267	246	246	254	254	216	216	228	228	286	286	276	276	280	280	213	213	258	258	210	210	351	351	208	208	296	296	294	294
874	874_2	HOR3908	Hordeum vulgare L. convar. vulgare var. hybernum Viborg	6	H		Iran	261	261	195	195	200	200	177	177	165	165	218	218	264	264	246	246	262	262	214	214	228	228	284	284	274	274	276	276	216	216	270	270	213	213	345	345	208	208	300	300	302	302
875	875_1	HOR4261	Hordeum vulgare L. convar. vulgare var. hybernum Viborg	6	H		Iran	276	276	195	195	200	200	177	177	174	174	258	258	258	258	246	246	258	258	214	214	228	228	286	286	274	274	280	280	213	213	273	273	207	207	345	345	212	212	296	296	302	302
876	876_2	HOR4262	Hordeum vulgare L. convar. vulgare var. hybernum Viborg	6	H		Iran	294	294	195	195	200	200	177	177	174	174	258	258	258	258	244	244	256	256	214	214	228	228	286	286	274	274	280	280	213	213	267	267	210	210	336	336	200	200	296	296	300	300
877	877_1	HOR4263	Hordeum vulgare L. convar. vulgare var. hybernum Viborg	6	H		Iran	336	336	195	195	200	200	177	177	174	174	262	262	258	258	246	246	258	258	214	214	224	224	286	286	274	274	280	280	213	213	267	267	207	207	339	345	204	204	296	296	302	302
878	878_1	HOR4264	Hordeum vulgare L. convar. vulgare var. hybernum Viborg	6	H		Iran	276	276	195	195	200	200	177	177	174	174	266	266	258	258	246	246	256	256	214	214	228	228	286	286	276	276	280	280	213	213	273	273	210	210	339	345	208	208	296	296	302	302
879	879_2	HOR4265	Hordeum vulgare L. convar. vulgare var. hybernum Viborg	6	H		Iran	276	276	195	195	200	200	177	177	168	168	194	194	258	258	246	246	256	256	214	214	228	228	286	286	276	276	280	280	216	216	267	267	207	207	324	324	208	208	296	296	302	302
880	880_2	HOR8455	Hordeum vulgare L. convar. vulgare var. parallelum Körn.	6	H		Iraq	336	336	195	195	198	198	177	177	174	174	258	258	264	264	244	244	264	264	214	214	228	228	290	290	274	274	282	282	216	216	267	267	210	210	336	336	200	200	296	296	300	300
881	881_2	HOR10477	Hordeum vulgare L. convar. vulgare var. coerulescens Sér.	6	H		Iraq	336	336	195	195	200	200	177	177	174	174	202	202	258	258	-99999	-99999	256	256	214	214	228	228	286	286	274	274	280	280	216	216	267	267	210	210	345	345	212	212	296	296	300	300
882	882_2	HOR10482	Hordeum vulgare L. convar. vulgare var. hybernum Viborg	6	H		Iraq	261	261	201	201	206	206	174	174	165	165	218	218	264	264	246	246	254	254	212	212	228	228	284	284	274	274	282	282	210	210	264	264	210	210	351	351	204	204	296	296	294	294
883	883_3	HOR10601	Hordeum vulgare L. convar. vulgare var. nigripallidum Regel	6	H		Iraq	351	351	195	195	200	200	168	177	174	174	242	242	258	258	244	244	256	256	214	214	228	228	286	286	274	274	282	282	216	216	267	267	210	210	324	324	212	212	292	292	302	302
884	884_2	HOR10602	Hordeum vulgare L. convar. vulgare var. hybernum Viborg	6	H		Iraq	351	351	195	195	200	200	177	177	174	174	258	258	258	258	244	244	266	266	214	214	220	220	286	286	274	274	280	280	216	216	267	267	213	213	336	336	200	200	296	296	300	300
885	885_1	HOR10604	Hordeum vulgare L. convar. vulgare var. nigrum (Willd.) Link	6	H		Iraq	336	336	195	195	200	200	177	177	174	174	258	258	258	258	244	244	256	256	214	214	228	228	290	290	274	274	280	280	216	216	264	264	210	210	336	336	200	200	288	288	302	302
886	886_1	HOR10605	Hordeum vulgare L. convar. vulgare var. nigripallidum Regel	6	H		Iraq	351	351	195	195	200	200	177	177	174	174	258	258	258	258	244	244	258	258	214	214	220	220	286	286	274	274	280	280	216	216	264	264	210	210	345	345	212	212	296	296	302	302
887	887_1	HOR10606	Hordeum vulgare L. convar. vulgare var. hybernum Viborg	6	H		Iraq	261	261	201	201	202	202	174	174	174	174	262	262	264	264	244	244	264	264	212	212	228	228	290	290	274	274	278	278	210	210	270	270	207	207	-99999	-99999	204	204	296	296	304	304
888	888_2	HOR10607	Hordeum vulgare L. convar. vulgare var. coerulescens Sér.	6	H		Iraq	336	336	195	195	200	200	177	177	174	174	258	258	258	258	244	244	256	256	214	214	228	228	290	290	274	274	282	282	216	216	267	267	210	210	336	336	212	212	288	288	300	300
889	889_4	HOR10609	Hordeum vulgare L. convar. vulgare var. hybernum Viborg	6	H		Iraq	273	273	195	195	200	200	177	177	174	174	202	202	258	258	244	244	266	266	214	214	228	228	286	286	274	274	280	280	216	216	267	267	210	210	336	336	212	212	288	288	300	300
890	890_2	HOR10615	Hordeum vulgare L. convar. vulgare var. rikotense Regel	6	H		Iraq	261	261	195	195	200	200	174	174	174	174	258	258	267	267	-99999	-99999	264	264	212	212	228	228	284	284	274	274	282	282	210	210	267	267	207	207	351	351	212	212	300	300	294	294
891	891_2	HOR10618	Hordeum vulgare L. convar. vulgare var. hybernum Viborg	6	H		Iraq	261	261	201	201	202	202	174	174	174	174	262	262	264	264	244	244	264	264	212	212	228	228	290	290	274	274	278	278	210	210	270	270	207	207	351	351	204	204	296	296	304	304
892	892_2	HOR10619	Hordeum vulgare L. convar. vulgare var. nigripallidum Regel	6	H		Iraq	336	336	195	195	200	200	174	174	174	174	202	202	258	258	244	244	256	256	214	214	228	228	286	286	274	274	280	280	216	216	267	267	210	210	345	345	212	212	296	296	300	300
893	893_4	HOR10622	Hordeum vulgare L. convar. vulgare var. hybernum Viborg	6	H		Iraq	336	336	195	195	200	200	177	177	174	174	266	266	258	258	244	244	266	266	214	214	224	224	290	290	274	274	280	280	216	216	267	267	213	213	336	336	200	200	292	292	300	300
894	894_2	HOR10623	Hordeum vulgare L. convar. vulgare var. hybernum Viborg	6	H		Iraq	351	351	195	195	200	200	177	177	174	174	258	258	258	258	244	244	266	266	214	214	228	228	290	290	274	274	282	282	216	216	267	267	213	213	339	345	200	200	296	296	300	300
895	895_3	HOR10624	Hordeum vulgare L. convar. vulgare var. nigripallidum Regel	6	H		Iraq	351	351	195	195	200	200	177	177	168	168	258	258	258	258	-99999	-99999	256	256	214	214	228	228	286	286	274	274	282	282	216	216	267	267	210	210	324	324	212	212	288	288	302	302
896	896_2	HOR10625	Hordeum vulgare L. convar. vulgare var. coerulescens Sér.	6	H		Iraq	336	336	195	195	200	200	177	177	174	174	226	226	258	258	244	244	256	256	214	214	228	228	290	290	274	274	282	282	216	216	267	267	210	210	336	336	212	212	292	292	302	302
897	897_3	HOR10627	Hordeum vulgare L. convar. vulgare var. nigripallidum Regel	6	H		Iraq	336	336	195	195	200	200	177	177	174	174	202	202	258	258	244	244	256	256	214	214	228	228	286	286	274	274	280	280	216	216	267	267	210	210	339	345	212	212	296	296	300	300
898	898_2	HOR10629	Hordeum vulgare L. convar. vulgare var. hybernum Viborg	6	H		Iraq	346	346	189	195	218	218	165	165	165	165	262	262	264	264	244	244	256	256	214	214	228	228	286	286	274	274	278	278	213	213	264	264	210	210	339	345	204	204	296	296	302	302
899	899_3	HOR10768	Hordeum vulgare L. convar. vulgare var. coerulescens Sér.	6	H		Iraq	336	336	195	195	200	200	177	177	174	174	258	258	258	258	244	244	256	256	214	214	228	228	286	286	274	274	282	282	216	216	267	267	210	210	336	336	212	212	288	288	300	300
900	900_1	HOR10769	Hordeum vulgare L. convar. vulgare var. nigripallidum Regel	6	H		Iraq	336	336	195	195	200	200	177	177	174	174	202	202	258	258	244	244	256	256	214	214	228	228	284	284	274	274	280	280	216	216	267	267	210	210	339	345	212	212	296	296	300	300
901	901_3	HOR10771	Hordeum vulgare L. convar. vulgare var. parallelum Körn.	6	H		Iraq	351	351	195	195	200	200	177	177	174	174	262	262	264	264	244	244	266	266	214	214	228	228	284	284	274	274	280	280	216	216	267	267	213	213	336	336	200	200	296	296	300	300
902	902_2	HOR1668	Hordeum vulgare L. convar. vulgare var. hybernum Viborg	6	H		Italy	351	351	201	201	202	202	174	174	165	165	250	250	264	264	246	246	266	266	212	212	224	224	286	286	274	274	278	278	210	210	258	258	207	207	336	336	212	212	300	300	302	302
903	903_3	HOR1669	Hordeum vulgare L. convar. vulgare var. hybernum Viborg	6	H		Italy	351	351	201	201	202	202	177	177	165	165	258	258	264	264	246	246	262	262	212	212	224	224	288	288	274	274	276	276	216	216	267	267	207	207	336	336	204	204	300	300	294	294
904	904_2	HOR2001	Hordeum vulgare L. convar. vulgare var. hybernum Viborg	6	H		Italy	261	261	201	201	202	202	174	174	165	165	250	250	264	264	246	246	260	260	212	212	224	224	286	286	274	274	278	278	216	216	267	267	201	201	336	336	204	204	300	300	294	294
905	905_4	HOR2002	Hordeum vulgare L. convar. vulgare var. hybernum Viborg	6	H		Italy	351	351	201	201	202	202	-99999	-99999	165	165	250	250	264	264	246	246	266	266	214	214	224	224	286	286	274	274	278	278	210	210	-99999	-99999	210	210	-99999	-99999	208	208	300	300	302	302
906	906_3	HOR2007	Hordeum vulgare L. convar. vulgare var. hybernum Viborg	6	H		Italy	351	351	201	201	184	184	165	165	165	165	230	230	264	264	246	246	266	266	212	212	224	224	286	286	274	274	276	276	210	210	267	267	210	210	336	336	200	212	300	300	302	302
907	907_3	HOR2008	Hordeum vulgare L. convar. vulgare var. hybernum Viborg	6	H		Italy	327	327	201	201	200	200	177	177	165	165	266	266	264	264	246	246	262	262	212	212	224	224	286	286	274	274	276	276	216	216	267	267	207	207	345	345	204	204	300	300	294	294
908	908_1	HOR2392	Hordeum vulgare L. convar. vulgare var. hybernum Viborg	6	H		Italy	261	261	201	201	206	206	174	174	165	165	250	250	264	264	246	246	264	264	214	214	224	224	286	286	274	274	278	278	210	210	267	267	210	210	336	336	212	212	300	300	302	302
909	909_3	HOR2414	Hordeum vulgare L. convar. vulgare var. hybernum Viborg	6	H		Italy	351	351	201	201	196	196	177	177	165	165	230	230	264	264	244	244	264	264	212	212	224	224	286	286	-99999	-99999	274	274	216	216	258	258	207	207	345	345	208	208	300	300	302	302
911	911_4	HOR9268	Hordeum vulgare L. convar. vulgare var. hybernum Viborg	6	H		Italy	351	351	195	195	216	216	174	174	165	165	262	262	264	264	246	246	266	266	212	212	224	224	290	290	274	274	276	276	210	210	264	264	207	207	336	336	208	208	296	296	302	302
912	912_4	HOR9308	Hordeum vulgare L. convar. vulgare var. parallelum Körn.	6	H		Italy	261	261	195	195	194	194	174	174	165	165	262	262	264	267	246	246	266	266	212	212	224	224	288	288	274	274	276	276	210	210	264	264	210	210	336	336	208	212	300	300	302	302
913	913_1	HOR9309	Hordeum vulgare L. convar. vulgare var. hybernum Viborg	6	H		Italy	264	264	201	201	-99999	-99999	174	174	162	162	258	258	261	261	246	246	260	260	212	212	224	224	284	284	274	274	276	276	216	216	264	264	207	207	334	334	208	208	300	300	300	300
914	914_2	HOR9462	Hordeum vulgare L. convar. vulgare var. densum Sér.	6	H		Italy	261	261	201	201	200	200	177	177	165	165	250	250	264	264	246	246	254	254	212	212	224	224	284	284	274	274	278	278	210	210	267	267	210	210	336	336	208	208	300	300	302	302
915	915_2	HOR9701	Hordeum vulgare L. convar. vulgare var. hybernum Viborg	6	H		Italy	261	261	201	201	202	202	177	177	165	165	250	250	264	264	246	246	262	262	212	212	228	228	288	288	274	274	276	276	216	216	267	267	213	213	336	336	208	208	300	300	294	294
916	916_3	HOR9702	Hordeum vulgare L. convar. vulgare var. hybernum Viborg	6	H		Italy	261	261	195	195	210	210	162	171	174	174	262	262	264	264	244	244	264	264	212	212	224	224	286	286	274	274	274	274	216	216	258	258	210	210	336	336	204	204	296	296	300	300
917	917_2	HOR9704	Hordeum vulgare L. convar. vulgare var. hybernum Viborg	6	H		Italy	351	351	201	201	200	200	174	174	165	165	262	262	264	264	246	246	266	266	212	212	224	224	292	292	274	274	278	278	210	210	264	264	213	213	336	336	208	208	300	300	302	302
918	918_2	HOR9706	Hordeum vulgare L. convar. vulgare var. hybernum Viborg	6	H		Italy	261	261	201	201	200	200	174	174	165	165	258	258	264	264	244	244	262	262	212	212	224	224	286	286	274	274	282	282	210	210	264	264	213	213	336	336	208	208	300	300	302	302
920	920_3	HOR9709	Hordeum vulgare L. convar. vulgare var. hybernum Viborg	6	H		Italy	261	261	201	201	216	216	174	174	165	165	258	258	264	264	246	246	264	264	212	212	224	224	294	294	274	274	276	276	210	210	264	264	207	207	336	336	208	208	300	300	302	302
922	922_4	HOR9712	Hordeum vulgare L. convar. vulgare var. hybernum Viborg	6	H		Italy	261	261	195	195	216	216	174	174	165	165	262	262	264	264	246	246	266	266	212	212	224	224	290	290	274	274	276	276	210	210	264	264	207	207	336	336	208	208	296	296	302	302
923	923_2	HOR9714	Hordeum vulgare L. convar. vulgare var. hybernum Viborg	6	H		Italy	261	261	195	195	216	216	174	174	165	165	262	262	264	264	246	246	266	266	212	212	224	224	290	290	274	274	276	276	210	210	264	264	207	207	336	336	208	208	296	296	302	302
924	924_2	HOR9872	Hordeum vulgare L. convar. vulgare var. parallelum Körn.	6	H		Italy	261	261	201	201	216	216	180	180	165	165	254	254	264	264	246	246	264	264	212	212	224	224	290	290	274	274	276	276	210	210	264	264	213	213	336	336	208	208	300	300	302	302
925	925_1	HOR9873	Hordeum vulgare L. convar. vulgare var. hybernum Viborg	6	H		Italy	261	261	201	201	200	200	174	174	165	165	254	254	264	264	246	246	262	262	214	214	228	228	286	286	274	274	278	278	210	210	264	264	210	210	336	336	204	204	292	292	302	302
927	927_2	HOR10059	Hordeum vulgare L. convar. vulgare var. parallelum Körn.	6	H		Italy	261	261	195	195	216	216	174	174	165	165	262	262	264	264	246	246	266	266	212	212	224	224	286	286	274	274	276	276	210	210	264	264	207	207	336	336	208	208	296	296	302	302
928	928_2	HOR10364	Hordeum vulgare L. convar. vulgare var. hybernum Viborg	6	H		Italy	261	261	195	195	200	200	177	177	165	165	254	254	264	264	246	246	252	252	212	212	224	224	286	286	274	274	274	274	216	216	264	264	207	207	336	336	204	204	300	300	294	294
929	929_2	HOR10411	Hordeum vulgare L. convar. vulgare var. parallelum Körn.	6	H		Italy	261	261	195	195	216	216	174	174	165	165	262	262	267	267	246	246	266	266	212	212	224	224	284	284	274	274	276	276	210	210	264	264	207	207	336	336	208	208	296	296	302	302
930	930_1	HOR10551	Hordeum vulgare L. convar. vulgare var. hybernum Viborg	6	H		Italy	351	351	201	201	218	218	174	174	162	162	250	250	261	261	246	246	-99999	-99999	212	212	224	224	286	286	274	274	274	274	210	210	266	266	-99999	-99999	342	342	208	208	300	300	-99999	-99999
932	932_1	HOR10553	Hordeum vulgare L. convar. vulgare var. hybernum Viborg	6	H		Italy	261	261	201	201	198	198	174	174	165	165	230	230	264	264	246	246	264	264	214	214	224	224	284	284	274	274	278	278	210	210	267	267	213	213	336	336	208	208	300	300	294	294
933	933_1	HOR10559	Hordeum vulgare L. convar. vulgare var. hybernum Viborg	6	H		Italy	351	351	201	201	218	218	174	174	165	165	250	250	264	264	244	244	264	264	214	214	224	224	288	288	274	274	278	278	210	210	267	267	213	213	336	336	208	208	300	300	304	304
934	934_2	HOR10560	Hordeum vulgare L. convar. vulgare var. hybernum Viborg	6	H		Italy	351	351	201	201	216	216	174	174	165	165	262	262	264	264	244	244	266	266	212	212	224	224	286	286	274	274	276	276	216	216	267	267	213	213	345	345	208	208	300	300	304	304
935	935_1	HOR10772	Hordeum vulgare L. convar. vulgare var. hybernum Viborg	6	H		Italy	351	351	201	201	200	200	174	174	165	165	250	250	264	264	244	244	256	256	214	214	224	224	286	286	274	274	276	276	210	210	258	258	213	213	-99999	-99999	208	208	300	300	302	302
936	936_2	HOR2766	Hordeum vulgare L. convar. vulgare var. hybernum Viborg	6	H		Libya	351	351	-99999	-99999	220	220	162	174	165	165	250	250	264	264	246	246	266	266	212	212	224	224	292	292	274	274	-99999	-99999	210	210	267	267	213	213	345	345	204	204	-99999	-99999	302	302
937	937_1	HOR2767	Hordeum vulgare L. convar. vulgare var. hybernum Viborg	6	H		Libya	351	351	195	195	200	200	174	174	174	174	246	246	264	264	244	244	256	256	214	214	228	228	286	286	274	274	282	282	219	219	267	267	207	207	-99999	-99999	204	204	288	288	304	304
938	938_2	HOR9715	Hordeum vulgare L. convar. vulgare var. parallelum Körn.	6	H		Libya	351	351	201	201	206	206	162	162	165	165	202	202	264	264	246	246	266	266	214	214	224	224	286	286	274	274	276	276	213	213	270	270	207	207	339	345	208	208	300	300	302	302
939	939_2	HOR9717	Hordeum vulgare L. convar. vulgare var. hybernum Viborg	6	H		Libya	351	351	201	201	202	202	174	174	174	174	230	230	264	264	244	244	266	266	214	214	224	224	286	286	274	274	276	276	213	213	270	270	210	210	339	345	204	204	300	300	302	302
940	940_1	HOR9720	Hordeum vulgare L. convar. vulgare var. hybernum Viborg	6	H		Libya	351	351	201	201	200	208	174	174	-99999	-99999	-99999	-99999	264	264	244	244	256	256	214	214	224	224	286	286	274	274	276	276	216	216	267	267	213	213	336	336	208	208	300	300	304	304
941	941_3	HOR9722	Hordeum vulgare L. convar. vulgare var. hybernum Viborg	6	H		Libya	351	351	201	201	210	210	177	177	174	174	238	238	264	264	246	246	264	264	214	214	224	224	290	290	274	274	278	278	216	216	267	267	207	207	345	345	208	208	300	300	302	302
942	942_1	HOR9723	Hordeum vulgare L. convar. vulgare var. hybernum Viborg	6	H		Libya	351	351	201	201	200	200	174	174	165	165	218	218	264	264	246	246	262	262	214	214	228	228	286	286	274	274	282	282	216	216	267	267	210	210	345	345	212	212	296	296	304	304
943	943_3	HOR9725	Hordeum vulgare L. convar. vulgare var. hybernum Viborg	6	H		Libya	351	351	201	201	202	202	174	174	165	165	230	230	264	264	244	244	264	264	214	214	224	224	286	286	274	274	278	278	216	216	267	267	210	210	345	345	208	208	300	300	304	304
944	944_1	HOR9726	Hordeum vulgare L. convar. vulgare var. hybernum Viborg	6	H		Libya	351	351	201	201	200	200	171	171	174	174	246	246	264	264	246	246	266	266	212	212	228	228	286	286	274	274	278	278	216	216	258	258	213	213	345	345	204	204	300	300	304	304
945	945_3	HOR9727	Hordeum vulgare L. convar. vulgare var. hybernum Viborg	6	H		Libya	351	351	201	201	202	202	168	174	165	165	230	230	264	264	244	244	266	266	214	214	224	224	290	290	274	274	276	276	213	213	270	270	210	210	339	345	204	204	300	300	-99999	-99999
946	946_1	HOR9728	Hordeum vulgare L. convar. vulgare var. parallelum Körn.	6	H		Libya	351	351	201	201	200	200	174	174	174	174	230	230	264	264	244	244	266	266	214	214	224	224	290	290	274	274	274	274	210	210	267	267	210	210	336	336	212	212	296	296	294	294
947	947_4	HOR9827	Hordeum vulgare L. convar. vulgare var. hybernum Viborg	6	H		Libya	351	351	201	201	202	202	174	174	174	174	246	246	264	264	244	244	264	264	212	212	224	224	290	290	274	274	280	280	216	216	267	267	210	210	336	336	208	208	300	300	302	302
948	948_1	HOR9828	Hordeum vulgare L. convar. vulgare var. hybernum Viborg	6	H		Libya	351	351	195	195	200	200	-99999	-99999	165	165	-99999	-99999	264	264	246	246	256	256	214	214	228	228	290	290	274	274	278	278	213	213	-99999	-99999	210	210	345	345	200	212	296	296	302	302
949	949_4	HOR9829	Hordeum vulgare L. convar. vulgare var. hybernum Viborg	6	H		Libya	351	351	201	201	202	202	168	174	-99999	-99999	238	238	264	264	244	244	264	264	212	212	224	224	290	290	274	274	278	278	216	216	267	267	210	210	336	336	212	212	300	300	302	302
950	950_3	HOR9830	Hordeum vulgare L. convar. vulgare var. hybernum Viborg	6	H		Libya	351	351	201	201	200	200	174	174	165	165	250	250	264	264	244	244	254	254	212	212	224	224	286	286	274	274	280	280	216	216	267	267	210	210	345	345	208	208	296	296	302	302
951	951_3	HOR9831	Hordeum vulgare L. convar. vulgare var. hybernum Viborg	6	H		Libya	351	351	201	201	202	202	177	177	165	165	246	246	264	264	244	244	264	264	212	212	224	224	286	286	274	274	276	276	216	216	267	267	207	207	339	345	204	208	300	300	292	292
952	952_1	HOR9832	Hordeum vulgare L. convar. vulgare var. hybernum Viborg	6	H		Libya	351	351	195	195	200	200	177	177	174	174	-99999	-99999	267	267	244	244	262	262	214	214	224	224	286	286	274	274	278	278	216	216	270	270	-99999	-99999	345	345	204	204	296	296	304	304
953	953_2	HOR9833	Hordeum vulgare L. convar. vulgare var. hybernum Viborg	6	H		Libya	351	351	201	201	202	202	177	177	165	165	250	250	264	264	244	244	264	264	212	212	224	224	286	286	274	274	280	280	216	216	267	267	210	210	345	345	208	208	300	300	302	302
954	954_2	HOR9834	Hordeum vulgare L. convar. vulgare var. hybernum Viborg	6	H		Libya	351	351	195	195	200	200	177	177	165	165	246	246	264	264	244	244	256	256	214	214	228	228	284	284	274	274	282	282	219	219	267	267	207	207	-99999	-99999	204	204	300	300	304	304
955	955_3	HOR9835	Hordeum vulgare L. convar. vulgare var. hybernum Viborg	6	H		Libya	351	351	195	195	200	200	177	177	165	165	-99999	-99999	264	264	246	246	256	256	214	214	228	228	284	284	274	274	278	278	213	213	258	258	207	207	339	345	204	204	288	288	304	304
956	956_3	HOR9836	Hordeum vulgare L. convar. vulgare var. hybernum Viborg	6	H		Libya	351	351	195	195	202	202	174	174	165	165	262	262	264	264	246	246	256	256	214	214	228	228	286	286	274	274	278	278	213	213	264	264	210	210	339	345	212	212	296	296	302	302
957	957_3	HOR9841	Hordeum vulgare L. convar. vulgare var. hybernum Viborg	6	H		Libya	261	261	201	201	202	202	174	174	174	174	262	262	264	264	244	244	264	264	212	212	228	228	286	286	274	274	278	278	210	210	270	270	207	207	351	351	204	204	296	296	304	304
958	958_1	HOR9842	Hordeum vulgare L. convar. vulgare var. hybernum Viborg	6	H		Libya	261	261	201	201	210	210	165	174	165	165	262	262	264	264	246	246	254	254	212	212	228	228	286	286	274	274	278	278	210	210	267	267	207	207	336	336	208	208	300	300	304	304
959	959_3	HOR9843	Hordeum vulgare L. convar. vulgare var. horsfordianum Wittm.	6	H		Libya	261	261	210	210	198	198	174	174	165	165	262	262	264	264	244	244	254	254	214	214	224	224	290	290	274	274	278	278	213	213	267	267	207	207	336	336	208	208	296	296	294	294
960	960_4	HOR9844	Hordeum vulgare L. convar. vulgare var. parallelum Körn.	6	H		Libya	351	351	201	201	202	202	174	174	165	165	230	230	264	264	244	244	264	264	214	214	224	224	288	288	274	274	278	278	216	216	267	267	210	210	339	345	208	208	300	300	304	304
961	961_2	HOR9860	Hordeum vulgare L. convar. vulgare var. hybernum Viborg	6	H		Libya	351	351	201	201	194	194	162	174	165	165	230	230	264	264	246	246	266	266	212	212	224	224	286	286	274	274	276	276	210	210	267	267	210	210	336	336	212	212	300	300	302	302
962	962_1	HOR9875	Hordeum vulgare L. convar. vulgare var. hybernum Viborg	6	H		Libya	351	351	201	201	202	202	174	174	165	165	254	254	264	264	244	244	256	256	214	214	224	224	286	286	274	274	276	276	213	213	270	270	213	213	336	336	204	204	300	300	302	302
963	963_2	HOR9876	Hordeum vulgare L. convar. vulgare var. hybernum Viborg	6	H		Libya	351	351	201	201	200	200	174	174	165	165	218	218	264	264	246	246	266	266	214	214	228	228	286	286	274	274	282	282	219	219	267	267	207	207	336	336	208	208	296	296	294	294
964	964_1	HOR9879	Hordeum vulgare L. convar. vulgare var. hybernum Viborg	6	H		Libya	351	351	201	201	206	206	174	174	165	165	270	270	264	264	246	246	256	256	214	214	224	224	286	286	274	274	276	276	216	216	270	270	207	207	336	336	204	204	300	300	302	302
965	965_3	HOR9881	Hordeum vulgare L. convar. vulgare var. parallelum Körn.	6	H		Libya	351	351	201	201	200	200	174	174	174	174	246	246	264	264	246	246	266	266	212	212	228	228	288	288	274	274	278	278	216	216	258	258	213	213	345	345	204	204	300	300	304	304
966	966_2	HOR9882	Hordeum vulgare L. convar. vulgare var. hybernum Viborg	6	H		Libya	351	351	201	201	220	220	174	174	165	165	250	250	264	264	246	246	266	266	212	212	224	224	286	286	274	274	278	278	210	210	267	267	213	213	345	345	204	204	300	300	302	302
967	967_2	HOR9884	Hordeum vulgare L. convar. vulgare var. hybernum Viborg	6	H		Libya	351	351	201	201	210	210	174	174	165	165	218	218	264	264	246	246	262	262	214	214	228	228	284	284	274	274	278	278	219	219	258	258	213	213	336	336	212	212	296	296	302	302
968	968_1	HOR9885	Hordeum vulgare L. convar. vulgare var. hybernum Viborg	6	H		Libya	351	351	201	201	200	200	174	174	174	174	246	246	264	264	246	246	266	266	212	212	228	228	286	286	274	274	278	278	216	216	258	258	213	213	345	345	204	204	300	300	304	304
969	969_3	HOR9886	Hordeum vulgare L. convar. vulgare var. hybernum Viborg	6	H		Libya	351	351	201	201	194	194	174	174	165	165	230	230	264	264	246	246	266	266	214	214	224	224	290	290	274	274	276	276	210	210	267	267	210	210	336	336	204	204	300	300	302	302
970	970_1	HOR9887	Hordeum vulgare L. convar. vulgare var. hybernum Viborg	6	H		Libya	351	351	201	201	210	210	174	174	165	165	246	246	264	264	244	244	264	264	214	214	224	224	290	290	274	274	278	278	213	213	270	270	210	210	336	336	204	204	296	296	304	304
971	971_1	HOR9888	Hordeum vulgare L. convar. vulgare var. hybernum Viborg	6	H		Libya	351	351	201	201	202	202	165	174	165	165	250	250	264	264	244	244	264	264	214	214	224	224	290	290	274	274	278	278	210	210	267	267	210	210	336	336	212	212	300	300	294	294
972	972_1	HOR9889	Hordeum vulgare L. convar. vulgare var. hybernum Viborg	6	H		Libya	351	351	201	201	200	200	174	174	165	165	218	218	264	264	246	246	262	262	214	214	228	228	286	286	274	274	282	282	219	219	267	267	213	213	336	336	212	212	296	296	302	302
973	973_1	HOR9890	Hordeum vulgare L. convar. vulgare var. hybernum Viborg	6	H		Libya	351	351	201	201	202	202	177	177	165	165	234	234	267	267	246	246	266	266	214	214	224	224	290	290	274	274	278	278	216	216	267	267	210	210	345	345	208	208	296	296	294	294
974	974_1	HOR9891	Hordeum vulgare L. convar. vulgare var. hybernum Viborg	6	H		Libya	351	351	201	201	200	200	174	174	165	165	218	218	264	264	246	246	262	262	214	214	228	228	286	286	274	274	282	282	213	213	267	267	213	213	336	336	208	208	296	296	302	302
975	975_4	HOR9923	Hordeum vulgare L. convar. vulgare var. hybernum Viborg	6	H		Libya	351	351	201	201	202	202	174	174	174	174	250	250	264	264	244	244	264	264	212	212	224	224	286	286	274	274	280	280	216	216	267	267	210	210	345	345	212	212	300	300	302	302
976	976_1	HOR9924	Hordeum vulgare L. convar. vulgare var. hybernum Viborg	6	H		Libya	351	351	201	201	202	202	174	174	165	165	254	254	264	264	244	244	262	262	212	212	224	224	286	286	274	274	278	278	216	216	267	267	201	201	336	336	208	208	300	300	294	294
977	977_3	HOR9925	Hordeum vulgare L. convar. vulgare var. hybernum Viborg	6	H		Libya	351	351	195	195	202	202	174	174	165	165	218	218	264	264	244	244	264	264	212	212	224	224	286	286	274	274	280	280	216	216	258	258	210	210	345	345	208	208	300	300	294	294
978	978_2	HOR9926	Hordeum vulgare L. convar. vulgare var. hybernum Viborg	6	H		Libya	351	351	195	195	200	200	177	177	168	168	254	254	267	267	244	244	264	264	214	214	224	224	284	284	274	274	278	278	216	216	270	270	207	207	345	345	204	204	296	296	304	304
979	979_2	HOR9927	Hordeum vulgare L. convar. vulgare var. hybernum Viborg	6	H		Libya	351	351	201	201	202	202	174	174	165	165	250	250	264	264	244	244	264	264	212	212	224	224	288	288	274	274	276	276	216	216	267	267	210	210	339	339	208	208	300	300	302	302
980	980_2	HOR9928	Hordeum vulgare L. convar. vulgare var. hybernum Viborg	6	H		Libya	351	351	201	201	200	200	174	174	165	165	246	246	264	264	244	244	256	256	212	212	233	233	286	286	274	274	276	276	216	216	267	267	210	210	345	345	208	208	296	296	302	302
981	981_2	HOR9929	Hordeum vulgare L. convar. vulgare var. hybernum Viborg	6	H		Libya	351	351	201	201	202	202	174	174	165	165	250	250	264	264	244	244	264	264	212	212	224	224	290	290	274	274	278	278	216	216	267	267	207	207	345	345	212	212	300	300	294	294
982	982_1	HOR9930	Hordeum vulgare L. convar. vulgare var. hybernum Viborg	6	H		Libya	261	261	201	201	202	202	174	174	165	165	250	250	264	264	246	246	256	256	214	214	228	228	286	286	274	274	278	278	210	210	264	264	210	210	336	336	208	208	300	300	304	304
983	983_2	HOR10083	Hordeum vulgare L. convar. vulgare var. hybernum Viborg	6	H		Libya	351	351	201	201	202	202	180	180	165	165	246	246	264	264	244	244	256	256	214	214	224	224	286	286	274	274	278	278	216	216	267	267	207	207	345	345	204	204	-99999	-99999	302	302
984	984_1	HOR10085	Hordeum vulgare L. convar. vulgare var. rikotense Regel	6	H		Libya	351	351	195	195	200	200	177	177	168	168	230	230	264	264	244	244	266	266	212	212	224	224	286	286	274	274	280	280	216	216	270	270	210	210	345	345	208	208	296	296	300	300
985	985_3	HOR10087	Hordeum vulgare L. convar. vulgare var. rikotense Regel	6	H		Libya	351	351	195	195	200	200	174	174	165	165	254	254	264	264	244	244	264	264	212	212	224	224	286	286	274	274	278	278	210	210	264	264	207	207	336	336	204	204	296	296	304	304
986	986_2	HOR10088	Hordeum vulgare L. convar. vulgare var. hybernum Viborg	6	H		Libya	351	351	201	201	202	202	174	174	165	165	230	230	264	264	244	244	264	264	214	214	224	224	290	290	274	274	278	278	216	216	267	267	210	210	339	345	208	208	300	300	304	304
987	987_3	HOR10090	Hordeum vulgare L. convar. vulgare var. hybernum Viborg	6	H		Libya	351	351	201	201	218	218	174	174	165	165	218	218	264	264	246	246	262	262	214	214	228	228	286	286	274	274	282	282	210	210	258	258	213	213	345	345	204	204	296	296	304	304
988	988_1	HOR10097	Hordeum vulgare L. convar. vulgare var. hybernum Viborg	6	H		Libya	351	351	201	201	202	202	174	174	165	165	218	218	264	264	244	244	264	264	212	212	224	224	286	286	274	274	280	280	216	216	267	267	210	210	336	336	204	204	300	300	302	302
989	989_3	HOR10098	Hordeum vulgare L. convar. vulgare var. hybernum Viborg	6	H		Libya	351	351	201	201	202	202	177	177	165	165	250	250	264	264	244	244	264	264	212	212	224	224	286	286	274	274	280	280	216	216	267	267	210	210	345	345	208	208	300	300	302	302
990	990_1	HOR10100	Hordeum vulgare L. convar. vulgare var. hybernum Viborg	6	H		Libya	351	351	201	201	202	202	177	177	165	165	246	246	264	264	244	244	264	264	212	212	224	224	286	286	274	274	282	282	216	216	267	267	210	210	336	336	208	208	300	300	294	294
991	991_3	HOR10101	Hordeum vulgare L. convar. vulgare var. hybernum Viborg	6	H		Libya	351	351	201	201	202	202	174	174	174	174	246	246	264	264	244	244	256	256	212	212	224	224	286	286	274	274	280	280	216	216	267	267	207	207	345	345	208	208	300	300	302	302
992	992_2	HOR10102	Hordeum vulgare L. convar. vulgare var. hybernum Viborg	6	H		Libya	351	351	201	201	200	200	177	177	165	165	262	262	264	264	246	246	256	256	214	214	228	228	286	286	274	274	282	282	219	219	267	267	207	207	345	345	204	204	288	288	302	302
993	993_2	HOR10103	Hordeum vulgare L. convar. vulgare var. hybernum Viborg	6	H		Libya	351	351	195	195	200	200	177	177	165	165	246	246	264	264	244	244	256	256	214	214	228	228	290	290	274	274	282	282	219	219	258	258	207	207	-99999	-99999	204	204	288	288	304	304
994	994_1	HOR10105	Hordeum vulgare L. convar. vulgare var. hybernum Viborg	6	H		Libya	351	351	195	195	202	202	177	177	165	165	250	250	264	264	246	246	256	256	218	218	228	228	290	290	274	274	282	282	210	210	267	267	207	207	345	345	204	204	300	300	304	304
995	995_3	HOR10106	Hordeum vulgare L. convar. vulgare var. subviolaceum Körn.	6	H		Libya	351	351	195	195	200	200	174	174	165	165	246	246	264	264	246	246	256	256	214	214	228	228	288	288	286	286	276	276	213	213	267	267	207	207	-99999	-99999	204	204	288	288	304	304
996	996_1	HOR10108	Hordeum vulgare L. convar. vulgare var. hybernum Viborg	6	H		Libya	351	351	195	195	200	200	177	177	165	165	246	246	264	264	244	244	256	256	214	214	228	228	290	290	274	274	282	282	213	213	267	267	207	207	339	345	204	204	300	300	302	302
997	997_2	HOR10109	Hordeum vulgare L. convar. vulgare var. hybernum Viborg	6	H		Libya	351	351	195	195	200	200	174	174	165	165	262	262	264	264	246	246	256	256	214	214	228	228	286	286	274	274	282	282	219	219	267	267	207	207	345	345	204	204	288	288	304	304
998	998_1	HOR10110	Hordeum vulgare L. convar. vulgare var. hybernum Viborg	6	H		Libya	351	351	195	195	200	200	177	177	165	165	246	246	264	264	246	246	256	256	214	214	228	228	288	288	274	274	278	278	219	219	267	267	207	207	336	336	204	204	288	288	304	304
999	999_4	HOR10111	Hordeum vulgare L. convar. vulgare var. hybernum Viborg	6	H		Libya	351	351	195	195	200	200	177	177	165	165	246	246	264	264	244	244	256	256	214	214	228	228	286	286	274	274	282	282	219	219	267	267	207	207	-99999	-99999	204	204	288	288	304	304
1000	1000_3	HOR10112	Hordeum vulgare L. convar. vulgare var. hybernum Viborg	6	H		Libya	351	351	-99999	-99999	200	200	162	162	165	165	234	234	264	264	244	244	256	256	214	214	228	228	286	286	274	274	-99999	-99999	213	213	-99999	-99999	207	207	345	345	200	200	-99999	-99999	302	302
1001	1001_2	HOR10113	Hordeum vulgare L. convar. vulgare var. parallelum Körn.	6	H		Libya	351	351	195	195	200	200	174	174	165	165	246	246	264	264	244	244	256	256	214	214	228	228	286	286	274	274	282	282	219	219	267	267	207	207	351	351	204	204	288	288	304	304
1002	1002_1	HOR10115	Hordeum vulgare L. convar. vulgare var. hybernum Viborg	6	H		Libya	351	351	195	195	200	200	177	177	165	165	246	246	264	264	244	244	256	256	214	214	228	228	286	286	274	274	278	278	219	219	267	267	207	207	-99999	-99999	204	204	288	288	304	304
1003	1003_4	HOR10116	Hordeum vulgare L. convar. vulgare var. hybernum Viborg	6	H		Libya	351	351	195	195	212	212	174	174	165	165	234	234	264	264	246	246	256	256	214	214	228	228	286	286	274	274	282	282	213	213	267	267	207	207	-99999	-99999	204	204	300	300	302	302
1004	1004_1	HOR10118	Hordeum vulgare L. convar. vulgare var. hybernum Viborg	6	H		Libya	264	264	195	201	200	200	159	159	174	174	246	246	264	264	246	246	256	256	214	214	224	228	286	286	274	274	282	282	213	213	264	267	210	210	345	351	204	208	288	288	294	304
1005	1005_3	HOR10119	Hordeum vulgare L. convar. vulgare var. hybernum Viborg	6	H		Libya	351	351	195	195	202	202	177	177	165	165	246	246	264	264	246	246	256	256	214	214	228	228	286	286	274	274	282	282	219	219	267	267	207	207	-99999	-99999	204	204	300	300	304	304
1006	1006_1	HOR10121	Hordeum vulgare L. convar. vulgare var. hybernum Viborg	6	H		Libya	351	351	201	201	202	202	171	171	165	165	250	250	264	264	244	244	264	264	212	212	224	224	286	286	274	274	280	280	216	216	267	267	210	210	339	345	208	208	300	300	302	302
1007	1007_3	HOR10122	Hordeum vulgare L. convar. vulgare var. hybernum Viborg	6	H		Libya	351	351	195	195	202	202	177	177	165	165	262	262	264	264	246	246	256	256	214	214	228	228	286	286	274	274	282	282	210	210	267	267	207	207	345	345	208	208	300	300	302	302
1008	1008_1	HOR10123	Hordeum vulgare L. convar. vulgare var. hybernum Viborg	6	H		Libya	351	351	195	195	190	202	165	165	165	165	246	246	264	264	246	246	256	256	214	214	228	228	286	286	274	274	282	282	213	213	267	267	207	207	339	345	196	208	300	300	302	302
1009	1009_2	HOR10124	Hordeum vulgare L. convar. vulgare var. hybernum Viborg	6	H		Libya	351	351	201	201	200	200	174	174	165	174	250	254	264	267	244	244	264	264	212	212	224	224	286	286	274	274	278	280	216	216	267	267	210	210	339	345	208	208	300	300	302	302
1010	1010_1	HOR10125	Hordeum vulgare L. convar. vulgare var. hybernum Viborg	6	H		Libya	351	351	195	195	200	200	174	174	165	165	246	246	264	264	244	244	256	256	214	214	228	228	286	286	274	274	282	282	219	219	258	258	207	207	339	345	204	204	288	288	304	304
1011	1011_1	HOR10126	Hordeum vulgare L. convar. vulgare var. hybernum Viborg	6	H		Libya	351	351	201	201	200	200	177	177	165	165	234	234	264	264	244	244	264	264	212	212	224	224	286	286	274	274	280	280	216	216	267	267	210	210	345	345	208	208	300	300	302	302
1012	1012_1	HOR10128	Hordeum vulgare L. convar. vulgare var. hybernum Viborg	6	H		Libya	351	351	201	201	202	202	174	174	165	165	246	246	264	264	244	244	264	264	212	212	224	224	286	286	274	274	276	276	216	216	267	267	207	207	345	345	208	208	300	300	302	302
1013	1013_3	HOR10130	Hordeum vulgare L. convar. vulgare var. hybernum Viborg	6	H		Libya	351	351	201	201	202	202	177	177	165	165	246	246	264	264	244	244	264	264	212	212	224	224	286	286	274	274	282	282	216	216	267	267	210	210	336	336	208	208	300	300	294	294
1014	1014_1	HOR10134	Hordeum vulgare L. convar. vulgare var. hybernum Viborg	6	H		Libya	351	351	201	201	202	202	159	159	165	165	250	250	264	264	244	244	264	264	212	212	224	224	286	286	274	274	276	276	219	219	267	267	210	210	-99999	-99999	208	208	300	300	302	302
1015	1015_2	HOR10135	Hordeum vulgare L. convar. vulgare var. hybernum Viborg	6	H		Libya	351	351	-99999	-99999	-99999	-99999	174	174	165	165	246	246	264	264	244	244	252	252	212	212	224	224	286	286	-99999	-99999	280	280	216	216	258	258	210	210	336	336	204	204	300	300	302	302
1016	1016_1	HOR10136	Hordeum vulgare L. convar. vulgare var. hybernum Viborg	6	H		Libya	351	351	195	195	200	200	177	177	165	165	246	246	264	264	-99999	-99999	256	256	214	214	228	228	286	286	274	274	282	282	219	219	267	267	207	207	339	345	204	204	288	288	304	304
1017	1017_4	HOR10137	Hordeum vulgare L. convar. vulgare var. hybernum Viborg	6	H		Libya	351	351	195	195	212	212	177	177	165	165	246	246	264	264	246	246	256	256	214	214	228	228	286	286	274	274	282	282	219	219	267	267	213	213	345	345	212	212	288	288	294	294
1018	1018_1	HOR10138	Hordeum vulgare L. convar. vulgare var. hybernum Viborg	6	H		Libya	351	351	195	195	212	212	177	177	165	165	246	246	264	264	246	246	256	256	214	214	228	228	286	286	274	274	276	276	219	219	267	267	207	207	345	345	204	204	288	288	302	302
1019	1019_3	HOR10140	Hordeum vulgare L. convar. vulgare var. hybernum Viborg	6	H		Libya	351	351	195	195	212	212	174	174	165	165	246	246	267	267	246	246	256	256	214	214	228	228	286	286	274	274	276	276	219	219	267	267	207	207	345	345	204	204	288	288	302	302
1020	1020_1	HOR10141	Hordeum vulgare L. convar. vulgare var. hybernum Viborg	6	H		Libya	351	351	195	195	200	200	162	162	165	165	246	246	264	264	244	244	256	256	214	214	228	228	286	286	274	274	278	278	219	219	258	258	207	207	336	336	204	204	288	288	302	302
1021	1021_4	HOR10142	Hordeum vulgare L. convar. vulgare var. hybernum Viborg	6	H		Libya	351	351	195	195	200	200	159	159	165	165	246	246	264	264	244	244	256	256	214	214	228	228	288	288	274	274	278	278	219	219	258	258	207	207	351	351	204	204	288	288	302	302
1022	1022_2	HOR10143	Hordeum vulgare L. convar. vulgare var. hybernum Viborg	6	H		Libya	351	351	201	201	200	200	171	171	165	165	250	250	264	264	244	244	264	264	212	212	224	224	286	286	274	274	282	282	216	216	267	267	210	210	351	351	204	204	300	300	302	302
1023	1023_1	HOR10144	Hordeum vulgare L. convar. vulgare var. hybernum Viborg	6	H		Libya	351	351	195	195	200	200	174	174	165	165	262	262	264	264	246	246	256	256	214	214	228	228	286	286	274	274	278	278	213	213	264	264	210	210	345	345	212	212	296	296	302	302
1024	1024_1	HOR10145	Hordeum vulgare L. convar. vulgare var. hybernum Viborg	6	H		Libya	351	351	201	201	202	202	174	174	165	165	250	250	264	264	244	244	264	264	212	212	224	224	286	286	274	274	280	280	216	216	267	267	210	210	345	345	208	208	300	300	302	302
1025	1025_2	HOR10147	Hordeum vulgare L. convar. vulgare var. subviolaceum Körn.	6	H		Libya	351	351	195	195	200	200	177	177	165	165	246	246	264	264	246	246	256	256	214	214	228	228	286	286	286	286	282	282	213	213	267	267	207	207	345	345	204	204	288	288	302	302
1026	1026_1	HOR10153	Hordeum vulgare L. convar. vulgare var. hybernum Viborg	6	H		Libya	351	351	195	195	200	200	174	174	165	165	246	246	264	264	244	244	256	256	214	214	228	228	286	286	274	274	282	282	219	219	267	267	207	207	351	351	204	204	300	300	304	304
1027	1027_3	HOR10155	Hordeum vulgare L. convar. vulgare var. subviolaceum Körn.	6	H		Libya	351	351	195	195	200	200	174	174	165	165	246	246	264	264	244	244	256	256	214	214	228	228	286	286	286	286	278	278	213	213	267	267	207	207	345	345	204	204	288	288	304	304
1028	1028_4	HOR10156	Hordeum vulgare L. convar. vulgare var. hybernum Viborg	6	H		Libya	261	261	201	201	206	206	174	174	165	165	230	230	267	267	246	246	256	256	214	214	224	224	286	286	274	274	280	280	210	210	258	258	207	207	336	336	208	208	300	300	294	294
1029	1029_2	HOR10157	Hordeum vulgare L. convar. vulgare var. hybernum Viborg	6	H		Libya	351	351	201	201	202	202	174	174	174	174	246	246	264	264	244	244	264	264	212	212	224	224	286	286	274	274	280	280	216	216	267	267	210	210	345	345	208	208	296	296	294	294
1030	1030_2	HOR10163	Hordeum vulgare L. convar. vulgare var. parallelum Körn.	6	H		Libya	351	351	201	201	202	202	174	174	165	165	230	230	264	264	244	244	266	266	214	214	224	224	290	290	274	274	276	276	213	213	270	270	210	210	345	345	204	204	300	300	302	302
1031	1031_1	HOR10165	Hordeum vulgare L. convar. vulgare var. hybernum Viborg	6	H		Libya	351	351	201	201	200	200	162	174	171	171	222	222	267	267	244	244	264	264	214	214	233	233	290	290	274	274	278	282	210	210	258	258	213	213	336	336	204	204	288	288	302	302
1032	1032_2	HOR10168	Hordeum vulgare L. convar. vulgare var. hybernum Viborg	6	H		Libya	351	351	201	201	202	202	174	174	165	165	230	230	264	264	244	244	266	266	214	214	224	224	288	288	274	274	278	278	213	213	270	270	210	210	339	345	204	204	300	300	302	302
1033	1033_2	HOR10170	Hordeum vulgare L. convar. vulgare var. hybernum Viborg	6	H		Libya	351	351	201	201	202	202	165	165	174	174	218	218	264	264	244	244	264	264	216	216	224	224	286	286	274	274	278	278	216	216	267	267	210	210	339	345	204	204	300	300	302	302
1034	1034_1	HOR10275	Hordeum vulgare L. convar. vulgare var. parallelum Körn.	6	H		Libya	351	351	195	195	192	192	177	177	165	165	246	246	264	264	244	244	256	256	214	214	228	228	286	286	274	274	276	276	213	213	267	267	207	207	351	351	204	204	288	288	304	304
1035	1035_2	HOR10276	Hordeum vulgare L. convar. vulgare var. hybernum Viborg	6	H		Libya	351	351	195	195	200	200	171	171	165	165	246	246	264	264	246	246	256	256	214	214	228	228	288	288	274	274	278	278	219	219	267	267	207	207	345	345	204	204	288	288	302	302
1036	1036_1	HOR10277	Hordeum vulgare L. convar. vulgare var. parallelum Körn.	6	H		Libya	351	351	195	195	200	200	174	174	165	165	246	246	264	264	244	244	256	256	214	214	228	228	288	288	274	274	278	278	219	219	267	267	207	207	-99999	-99999	212	212	288	288	304	304
1037	1037_3	HOR10278	Hordeum vulgare L. convar. vulgare var. parallelum Körn.	6	H		Libya	351	351	195	195	200	200	174	174	165	165	246	246	264	264	244	244	256	256	214	214	228	228	286	286	274	274	282	282	219	219	267	267	207	207	351	351	204	204	288	288	304	304
1038	1038_2	HOR10279	Hordeum vulgare L. convar. vulgare var. parallelum Körn.	6	H		Libya	351	351	195	195	212	212	177	177	165	165	242	242	267	267	246	246	256	256	214	214	228	228	288	288	274	274	282	282	219	219	267	267	207	207	351	351	204	204	288	288	302	302
1039	1039_3	HOR10282	Hordeum vulgare L. convar. vulgare var. rikotense Regel	6	H		Libya	261	261	195	195	200	200	171	171	174	174	258	258	267	267	246	246	264	264	212	212	228	228	284	284	274	274	282	282	210	210	267	267	210	210	351	351	212	212	300	300	294	294
1040	1040_1	HOR10283	Hordeum vulgare L. convar. vulgare var. parallelum Körn.	6	H		Libya	351	351	195	195	202	202	174	174	165	165	238	238	264	264	244	244	256	256	214	214	228	228	288	288	274	274	278	278	219	219	258	258	213	213	345	345	204	204	288	288	302	302
1041	1041_2	HOR10398	Hordeum vulgare L. convar. vulgare var. hybernum Viborg	6	H		Libya	351	351	201	201	202	202	174	174	165	165	230	230	264	264	244	244	266	266	214	214	228	228	286	286	274	274	276	276	213	213	270	270	210	210	339	339	204	204	300	300	302	302
1042	1042_4	HOR10107	Hordeum vulgare L. convar. vulgare	6	n		Libya	351	351	201	201	202	202	165	174	165	165	234	234	264	264	244	244	262	262	214	214	228	228	286	286	286	286	278	278	210	210	267	267	207	207	345	345	208	208	288	288	302	302
1043	1043_3	HOR758	Hordeum vulgare L. convar. vulgare var. hybernum Viborg	6	H		Macedonia	351	351	201	201	200	200	174	174	174	174	230	230	267	267	246	246	252	252	212	212	228	228	284	284	274	274	282	282	210	210	264	264	210	210	336	336	212	212	296	296	294	294
1044	1044_2	HOR1683	Hordeum vulgare L. convar. vulgare var. hybernum Viborg	6	H		Morocco	351	351	201	201	202	202	171	171	174	174	-99999	-99999	264	264	244	244	264	264	214	214	224	224	290	290	274	274	276	276	216	216	267	267	210	210	336	336	208	208	300	300	294	294
1045	1045_3	HOR4029	Hordeum vulgare L. convar. vulgare var. hybernum Viborg	6	H		Marocco	351	351	201	201	200	200	171	171	165	165	266	266	264	264	246	246	264	264	214	214	224	224	286	286	274	274	276	276	219	219	267	267	213	213	336	336	208	208	300	300	294	294
1046	1046_2	HOR7325	Hordeum vulgare L. convar. vulgare var. hybernum Viborg	6	H		Marocco	351	351	201	201	202	202	177	177	165	165	250	250	267	267	-99999	-99999	266	266	212	212	224	224	-99999	-99999	274	274	276	276	216	216	267	267	207	207	336	336	204	204	300	300	302	302
1047	1047_3	HOR7326	Hordeum vulgare L. convar. vulgare var. hybernum Viborg	6	H		Marocco	351	351	201	201	202	202	162	174	174	174	230	230	264	264	246	246	262	262	214	214	224	224	286	286	274	274	278	278	216	216	258	258	210	210	336	336	204	204	288	288	302	302
1048	1048_1	HOR7327	Hordeum vulgare L. convar. vulgare var. hybernum Viborg	6	H		Marocco	351	351	201	201	200	200	165	174	165	165	250	250	267	267	244	244	256	256	214	214	224	224	286	286	274	274	276	276	219	219	267	267	213	213	339	345	208	208	288	288	304	304
1049	1049_4	HOR7328	Hordeum vulgare L. convar. vulgare var. hybernum Viborg	6	H		Marocco	351	351	201	201	202	202	174	174	165	165	250	250	267	267	246	246	264	264	212	212	224	224	286	286	274	274	278	278	207	216	267	267	213	213	336	336	208	208	300	300	302	302
1050	1050_2	HOR7329	Hordeum vulgare L. convar. vulgare var. hybernum Viborg	6	H		Marocco	351	351	201	201	202	202	174	174	165	165	250	250	264	264	246	246	264	264	214	214	224	224	286	286	274	274	276	276	216	216	267	267	210	210	336	336	204	204	300	300	302	302
1051	1051_2	HOR7330	Hordeum vulgare L. convar. vulgare var. hybernum Viborg	6	H		Marocco	351	351	201	201	202	202	171	171	165	165	230	230	267	267	244	244	266	266	214	214	224	224	286	286	274	274	278	278	219	219	267	267	207	207	336	336	204	204	300	300	294	294
1052	1052_1	HOR7331	Hordeum vulgare L. convar. vulgare var. hybernum Viborg	6	H		Marocco	351	351	201	201	202	202	174	174	165	165	230	230	264	264	246	246	266	266	214	214	224	224	286	286	274	274	276	276	216	216	258	258	210	210	336	336	204	204	300	300	302	302
1053	1053_3	HOR7332	Hordeum vulgare L. convar. vulgare var. hybernum Viborg	6	H		Marocco	351	351	201	201	202	202	168	174	165	165	230	230	264	264	246	246	266	266	214	214	224	224	286	286	274	274	276	276	216	216	-99999	-99999	210	210	336	336	204	204	300	300	302	302
1054	1054_1	HOR7333	Hordeum vulgare L. convar. vulgare var. hybernum Viborg	6	H		Marocco	351	351	201	201	204	204	180	180	165	165	250	250	267	267	246	246	264	264	214	214	224	224	286	286	274	274	278	278	216	216	267	267	210	210	336	336	204	204	300	300	294	294
1055	1055_3	HOR13160	Hordeum vulgare L. convar. vulgare var. hybernum Viborg	6	H		Marocco	351	351	201	201	202	202	174	174	165	165	254	254	264	264	246	246	262	262	214	214	224	224	286	286	274	274	278	278	216	216	-99999	-99999	210	210	336	336	204	204	300	300	294	294
1056	1056_2	HOR13412	Hordeum vulgare L. convar. vulgare var. hybernum Viborg	6	H		Marocco	351	351	201	201	202	202	159	159	174	174	238	238	267	267	246	246	264	264	214	214	224	224	286	286	274	274	276	276	216	216	267	267	207	207	336	336	204	204	296	296	304	304
1057	1057_2	HOR13413	Hordeum vulgare L. convar. vulgare var. hybernum Viborg	6	H		Marocco	351	351	201	201	202	202	162	162	174	174	230	230	267	267	246	246	264	264	214	214	224	224	286	286	274	274	278	278	216	216	267	267	213	213	336	336	208	208	300	300	302	302
1058	1058_1	HOR13414	Hordeum vulgare L. convar. vulgare var. hybernum Viborg	6	H		Marocco	351	351	201	201	202	202	174	174	174	174	230	230	264	264	246	246	266	266	214	214	224	224	286	286	274	274	278	278	216	216	267	267	210	210	336	336	208	208	300	300	302	302
1059	1059_3	HOR13415	Hordeum vulgare L. convar. vulgare var. hybernum Viborg	6	H		Marocco	351	351	201	201	198	198	171	171	174	174	-99999	-99999	264	264	246	246	264	264	214	214	224	224	286	286	274	274	276	276	219	219	267	267	207	207	336	336	204	204	300	300	294	294
1060	1060_1	HOR13416	Hordeum vulgare L. convar. vulgare var. hybernum Viborg	6	H		Marocco	351	351	201	201	202	202	171	171	174	174	-99999	-99999	264	264	246	246	262	262	214	214	224	224	286	286	274	274	278	278	216	216	267	267	207	207	336	336	208	208	296	296	294	294
1061	1061_3	HOR13417	Hordeum vulgare L. convar. vulgare var. hybernum Viborg	6	H		Marocco	351	351	201	201	202	202	174	174	174	174	238	238	264	264	246	246	264	264	214	214	224	224	286	286	274	274	276	276	216	216	258	258	210	210	336	336	208	208	300	300	294	294
1062	1062_1	HOR13418	Hordeum vulgare L. convar. vulgare var. hybernum Viborg	6	H		Marocco	351	351	201	201	216	216	162	171	165	165	250	250	267	267	246	246	264	264	214	214	224	224	286	286	274	274	276	276	216	216	267	267	207	207	336	336	208	208	300	300	294	294
1063	1063_4	HOR13419	Hordeum vulgare L. convar. vulgare var. hybernum Viborg	6	H		Marocco	351	351	201	201	202	202	162	162	165	165	250	250	264	264	246	246	264	264	214	214	224	224	286	286	274	274	278	278	216	216	267	267	210	210	336	336	204	204	300	300	302	302
1064	1064_2	HOR13420	Hordeum vulgare L. convar. vulgare var. hybernum Viborg	6	H		Marocco	351	351	201	201	202	202	168	168	165	165	230	230	267	267	246	246	266	266	214	214	224	224	286	286	274	274	278	278	216	216	267	267	210	210	336	336	212	212	300	300	302	302
1065	1065_2	HOR13421	Hordeum vulgare L. convar. vulgare var. hybernum Viborg	6	H		Marocco	351	351	201	201	200	200	177	177	174	174	250	250	264	264	-99999	-99999	264	264	214	214	224	224	286	286	274	274	278	278	216	216	267	267	213	213	336	336	208	208	300	300	294	294
1066	1066_2	HOR13422	Hordeum vulgare L. convar. vulgare var. hybernum Viborg	6	H		Marocco	351	351	201	201	200	200	177	177	165	165	262	262	264	264	246	246	262	262	214	214	224	224	286	286	274	274	278	278	216	216	-99999	-99999	207	207	336	336	208	208	300	300	-99999	-99999
1067	1067_4	HOR13423	Hordeum vulgare L. convar. vulgare var. hybernum Viborg	6	H		Marocco	351	351	201	201	202	202	177	177	165	165	250	250	267	267	246	246	264	264	214	214	224	224	286	286	274	274	276	276	216	216	267	267	207	207	336	336	204	204	300	300	304	304
1068	1068_1	HOR13424	Hordeum vulgare L. convar. vulgare var. hybernum Viborg	6	H		Marocco	351	351	201	201	204	204	171	171	165	165	250	250	264	264	246	246	264	264	212	212	224	224	286	286	274	274	278	278	216	216	267	267	210	210	336	336	208	208	300	300	304	304
1069	1069_2	HOR13425	Hordeum vulgare L. convar. vulgare var. hybernum Viborg	6	H		Marocco	351	351	201	201	200	200	171	171	165	165	230	230	264	264	246	246	256	256	214	214	224	224	286	286	274	274	278	278	216	216	267	267	210	210	336	336	204	204	296	296	302	302
1070	1070_2	HOR13426	Hordeum vulgare L. convar. vulgare var. hybernum Viborg	6	H		Marocco	351	351	201	201	200	200	180	180	165	165	250	250	264	264	246	246	266	266	214	214	224	224	286	286	274	274	278	278	216	216	267	267	207	207	336	336	208	208	296	296	302	302
1071	1071_1	HOR13427	Hordeum vulgare L. convar. vulgare var. hybernum Viborg	6	H		Marocco	351	351	201	201	200	200	180	180	165	165	250	250	264	264	246	246	266	266	214	214	224	224	286	286	274	274	278	278	216	216	267	267	207	207	336	336	208	208	296	296	302	302
1072	1072_1	HOR13428	Hordeum vulgare L. convar. vulgare var. hybernum Viborg	6	H		Marocco	351	351	201	201	200	210	180	180	165	165	250	250	264	264	246	246	266	266	214	214	224	224	286	286	274	274	278	278	210	210	267	267	207	207	336	336	208	208	296	296	302	302
1073	1073_2	HOR13429	Hordeum vulgare L. convar. vulgare var. hybernum Viborg	6	H		Marocco	351	351	201	201	200	200	180	180	165	165	250	250	264	264	246	246	266	266	214	214	224	224	286	286	274	274	278	278	216	216	267	267	207	207	336	336	208	208	296	296	302	302
1074	1074_2	HOR13430	Hordeum vulgare L. convar. vulgare var. hybernum Viborg	6	H		Marocco	351	351	201	201	200	200	180	180	165	165	250	250	264	264	246	246	266	266	214	214	224	224	286	286	274	274	278	278	216	216	267	267	207	207	336	336	208	208	296	296	302	302
1075	1075_2	HOR13431	Hordeum vulgare L. convar. vulgare var. hybernum Viborg	6	H		Marocco	351	351	201	201	200	200	180	180	165	165	250	250	264	264	244	244	264	264	212	212	224	224	286	286	274	274	278	278	216	216	267	267	210	210	336	336	204	204	288	288	294	294
1076	1076_1	HOR13432	Hordeum vulgare L. convar. vulgare var. hybernum Viborg	6	H		Marocco	351	351	201	201	200	200	180	180	165	165	250	250	264	264	246	246	264	264	214	214	224	224	290	290	274	274	278	278	216	216	267	267	207	207	336	336	208	208	300	300	302	302
1077	1077_2	HOR13433	Hordeum vulgare L. convar. vulgare var. hybernum Viborg	6	H		Marocco	261	261	201	201	200	200	180	180	165	165	250	250	264	264	246	246	266	266	214	214	224	224	286	286	274	274	278	278	216	216	267	267	207	207	336	336	208	208	296	296	302	302
1078	1078_1	HOR13434	Hordeum vulgare L. convar. vulgare var. hybernum Viborg	6	H		Marocco	351	351	201	201	202	202	180	180	165	165	250	250	264	264	246	246	264	264	214	214	224	224	286	286	274	274	276	276	216	216	267	267	207	207	336	336	208	208	300	300	304	304
1079	1079_3	HOR13435	Hordeum vulgare L. convar. vulgare var. hybernum Viborg	6	H		Marocco	351	351	201	201	202	202	180	180	165	165	250	250	264	264	246	246	266	266	214	214	224	224	286	286	274	274	276	276	210	210	267	267	207	207	336	336	208	208	300	300	302	302
1080	1080_1	HOR13436	Hordeum vulgare L. convar. vulgare var. hybernum Viborg	6	H		Marocco	351	351	201	201	202	202	165	174	165	165	258	258	267	267	244	244	264	264	214	214	224	224	286	286	274	274	276	276	210	210	267	267	210	210	336	336	204	204	300	300	294	294
1081	1081_2	HOR13437	Hordeum vulgare L. convar. vulgare var. hybernum Viborg	6	H		Marocco	351	351	210	210	204	204	180	180	165	165	250	250	264	264	246	246	266	266	214	214	224	224	286	286	274	274	278	278	210	210	258	258	207	207	336	336	208	208	296	296	294	294
1082	1082_1	HOR13438	Hordeum vulgare L. convar. vulgare var. hybernum Viborg	6	H		Marocco	351	351	201	201	200	200	180	180	165	165	250	250	264	264	246	246	266	266	214	214	224	224	286	286	274	274	276	276	210	210	258	258	207	207	336	336	208	208	288	288	302	302
1083	1083_3	HOR13439	Hordeum vulgare L. convar. vulgare var. hybernum Viborg	6	H		Marocco	351	351	201	201	198	204	174	174	165	165	250	250	264	264	244	244	264	264	-99999	-99999	224	224	286	286	274	274	280	280	213	213	267	267	213	213	336	336	204	204	296	296	304	304
1084	1084_1	HOR13440	Hordeum vulgare L. convar. vulgare var. hybernum Viborg	6	H		Marocco	351	351	201	201	202	202	171	171	165	165	250	250	267	267	246	246	266	266	214	214	224	224	286	286	274	274	278	278	213	213	267	267	207	207	336	336	204	204	300	300	304	304
1085	1085_4	HOR13441	Hordeum vulgare L. convar. vulgare var. hybernum Viborg	6	H		Marocco	351	351	201	201	202	202	174	174	174	174	230	230	264	264	244	244	264	264	214	214	224	224	290	290	274	274	276	276	210	210	267	267	210	210	336	336	208	208	296	296	302	302
1086	1086_2	HOR13442	Hordeum vulgare L. convar. vulgare var. hybernum Viborg	6	H		Marocco	351	351	201	201	206	206	174	174	174	174	254	254	264	264	246	246	262	262	214	214	224	224	292	292	274	274	278	278	210	210	267	267	213	213	336	336	208	208	300	300	302	302
1087	1087_2	HOR13443	Hordeum vulgare L. convar. vulgare var. hybernum Viborg	6	H		Marocco	351	351	201	201	204	204	174	174	165	165	250	250	264	264	244	244	262	262	214	214	224	224	286	286	274	274	278	278	216	216	267	267	207	207	336	336	208	208	300	300	294	294
1088	1088_1	HOR13444	Hordeum vulgare L. convar. vulgare var. hybernum Viborg	6	H		Marocco	351	351	201	201	204	204	174	174	165	165	234	234	264	264	246	246	264	264	214	214	224	224	286	286	274	274	278	278	216	216	267	267	210	210	336	336	208	208	300	300	294	294
1089	1089_3	HOR13445	Hordeum vulgare L. convar. vulgare var. hybernum Viborg	6	H		Marocco	351	351	201	201	204	204	174	174	174	174	230	230	264	264	246	246	256	256	212	212	224	224	290	290	274	274	276	276	210	210	267	267	210	210	336	336	204	212	300	300	294	294
1090	1090_1	HOR13446	Hordeum vulgare L. convar. vulgare var. hybernum Viborg	6	H		Marocco	351	351	201	201	202	202	174	174	-99999	-99999	-99999	-99999	267	267	246	246	256	256	212	212	224	224	286	286	274	274	278	278	216	216	267	267	210	210	336	336	204	204	300	300	294	294
1091	1091_3	HOR13447	Hordeum vulgare L. convar. vulgare var. coerulescens Sér.	6	H		Marocco	351	351	201	201	202	202	-99999	-99999	165	165	258	258	264	264	-99999	-99999	256	256	212	212	224	224	286	286	274	274	278	278	216	216	-99999	-99999	210	210	336	336	208	208	300	300	304	304
1092	1092_2	BCC1584	Hordeum vulgare L. convar. vulgare var. hybernum Viborg	6	H		Poland	351	351	195	195	218	218	174	174	165	165	262	262	264	264	246	246	264	264	214	214	224	224	288	288	274	274	278	278	216	216	267	267	207	207	336	336	212	212	300	300	294	294
1095	1095_4	HOR8814	Hordeum vulgare L. convar. vulgare var. hybernum Viborg	6	H		Poland	351	351	207	207	206	206	174	174	174	174	238	238	264	264	246	246	264	264	212	212	224	224	284	284	274	274	274	274	216	216	258	258	210	210	336	351	204	204	296	296	300	300
1096	1096_2	HOR8821	Hordeum vulgare L. convar. vulgare var. hybernum Viborg	6	H		Poland	351	351	195	195	200	200	174	174	174	174	266	266	267	267	244	244	262	262	214	214	228	228	286	286	274	274	278	278	210	210	267	267	210	210	336	336	212	212	300	300	294	294
1097	1097_3	HOR8823	Hordeum vulgare L. convar. vulgare var. hybernum Viborg	6	H		Poland	261	261	195	195	-99999	-99999	168	168	174	174	266	266	267	267	244	244	252	262	214	214	228	228	286	286	274	274	278	278	210	210	267	267	210	210	336	336	204	204	300	300	294	294
1099	1099_4	HOR8826	Hordeum vulgare L. convar. vulgare var. hybernum Viborg	6	H		Poland	261	261	195	195	-99999	-99999	174	174	174	174	250	250	267	267	244	244	262	262	212	212	228	228	286	286	274	274	278	278	210	210	267	267	210	210	336	336	216	216	300	300	294	294
1100	1100_1	HOR10249	Hordeum vulgare L. convar. vulgare var. rikotense Regel	6	H		Poland	261	261	195	195	200	200	174	174	174	174	262	262	264	264	246	246	254	254	212	212	228	228	286	286	274	274	276	276	216	216	270	270	207	207	351	351	200	200	296	296	294	294
1101	1101_3	HOR10409	Hordeum vulgare L. convar. vulgare var. hybernum Viborg	6	H		Poland	261	261	195	195	200	200	165	174	174	174	258	258	267	267	244	244	264	264	214	214	224	224	284	284	274	274	276	276	210	210	267	267	210	210	336	336	204	204	300	300	294	294
1102	1102_3	HOR10770	Hordeum vulgare L. convar. vulgare var. hybernum Viborg	6	H		Poland	261	261	195	195	202	202	174	174	174	174	262	262	264	264	246	246	254	254	-99999	-99999	228	228	286	286	282	282	276	282	216	216	270	270	210	210	351	351	200	208	296	296	304	304
1103	1103_2	HOR3693	Hordeum vulgare L. convar. vulgare var. hybernum Viborg	6	H		Romania	261	261	195	195	200	208	174	174	174	174	218	218	264	264	-99999	-99999	264	264	212	212	228	228	284	284	274	274	276	276	210	210	264	264	210	210	351	351	216	216	296	296	294	294
1104	1104_3	HOR3700	Hordeum vulgare L. convar. vulgare var. hybernum Viborg	6	H		Romania	261	261	201	201	200	206	174	174	174	174	218	218	264	264	246	246	264	264	212	212	224	224	284	284	274	274	274	274	210	210	264	264	210	210	351	351	212	212	296	296	294	294
1105	1105_3	HOR3701	Hordeum vulgare L. convar. vulgare var. hybernum Viborg	6	H		Romania	261	261	201	201	202	202	174	174	174	174	222	222	264	264	246	246	264	264	212	212	224	224	284	284	274	274	276	276	210	210	264	264	210	210	351	351	212	212	296	296	294	294
1106	1106_4	BCC1484	Hordeum vulgare L. convar. vulgare var. hybernum Viborg	6	H		Russia	261	261	195	195	188	188	177	177	165	174	262	274	264	264	244	244	264	264	214	214	224	224	284	284	274	274	274	274	216	216	267	267	210	210	336	336	208	208	300	300	294	294
1107	1107_2	BCC1488	Hordeum vulgare L. convar. vulgare var. hybernum Viborg	6	H		Russia	261	261	195	195	194	194	174	174	174	174	258	258	267	267	246	246	254	254	212	212	228	228	284	284	274	274	280	280	210	210	267	267	210	210	351	351	200	208	296	296	294	294
1108	1108_1	BCC1491	Hordeum vulgare L. convar. vulgare var. hybernum Viborg	6	H		Russia	261	261	195	195	200	200	177	177	174	174	274	274	267	267	244	244	264	264	214	214	228	228	284	284	274	274	274	274	210	210	267	267	207	207	336	336	208	208	300	300	294	294
1109	1109_2	HOR7375	Hordeum vulgare L. convar. vulgare var. rikotense Regel	6	H		Slovakia	261	261	195	195	-99999	-99999	174	174	174	174	250	250	264	264	246	246	264	264	212	212	228	228	284	284	274	274	282	282	210	210	267	267	207	207	351	351	208	208	300	300	294	294
1110	1110_1	HOR7436	Hordeum vulgare L. convar. vulgare var. hybernum Viborg	6	H		Slovakia	261	261	201	201	192	192	174	174	165	165	262	262	264	264	246	246	258	258	-99999	-99999	228	228	284	284	274	274	278	278	210	210	264	264	210	210	351	351	208	208	296	296	302	302
1111	1111_2	HOR7437	Hordeum vulgare L. convar. vulgare var. rikotense Regel	6	H		Slovakia	261	261	195	195	-99999	-99999	174	174	174	174	258	258	267	267	246	246	264	264	212	212	228	228	284	284	274	274	282	282	210	210	267	267	210	210	351	351	212	212	300	300	294	294
1112	1112_2	BCC1576	Hordeum vulgare L. convar. vulgare var. hybernum Viborg	6	H		Spain	351	351	201	201	202	202	174	174	165	165	250	250	267	267	244	244	266	266	-99999	-99999	224	224	286	286	274	274	278	278	216	216	267	267	207	207	336	336	208	208	300	300	294	294
1113	1113_3	HOR2254	Hordeum vulgare L. convar. vulgare var. ibericum (Vavilov & Orlov) Mansf.	6	H		Spain	336	336	210	210	200	200	174	174	165	165	266	266	258	258	246	246	254	254	-99999	-99999	224	224	286	286	274	274	282	282	213	213	264	264	210	210	345	345	208	208	296	296	294	294
1114	1114_1	HOR2967	Hordeum vulgare L. convar. vulgare var. hybernum Viborg	6	H		Spain	261	261	201	201	202	202	174	174	174	174	250	250	267	267	244	244	256	256	214	214	224	224	286	286	274	274	278	278	216	216	267	267	207	207	336	336	208	208	296	296	294	294
1115	1115_2	HOR3935	Hordeum vulgare L. convar. vulgare var. hybernum Viborg	6	H		Spain	351	351	201	201	194	194	177	177	165	165	250	250	267	267	246	246	266	266	212	212	224	224	286	286	274	274	278	278	216	216	264	264	207	207	336	336	208	208	300	300	302	302
1116	1116_2	HOR3936	Hordeum vulgare L. convar. vulgare var. hybernum Viborg	6	H		Spain	351	351	201	201	202	202	174	174	165	165	250	250	267	267	246	246	266	266	212	212	224	224	286	286	274	274	278	278	216	216	267	267	210	210	336	336	208	208	300	300	294	294
1117	1117_4	HOR3937	Hordeum vulgare L. convar. vulgare var. hybernum Viborg	6	H		Spain	351	351	195	195	194	194	177	177	165	165	250	250	267	267	246	246	256	256	214	214	224	224	286	286	274	274	278	278	216	216	267	267	210	210	336	336	208	208	300	300	302	302
1118	1118_2	HOR3938	Hordeum vulgare L. convar. vulgare var. hybernum Viborg	6	H		Spain	351	351	195	195	194	194	177	177	165	165	246	246	267	267	244	244	266	266	212	212	224	224	286	286	274	274	278	278	216	216	267	267	210	210	336	336	208	208	300	300	302	302
1119	1119_1	HOR3939	Hordeum vulgare L. convar. vulgare var. hybernum Viborg	6	H		Spain	351	351	201	201	216	216	180	180	165	165	258	258	267	267	244	244	266	266	212	212	224	224	286	286	274	274	278	278	216	216	267	267	210	210	336	336	208	208	300	300	302	302
1120	1120_1	HOR4072	Hordeum vulgare L. convar. vulgare var. hybernum Viborg	6	H		Spain	351	351	201	201	202	202	177	177	165	165	-99999	-99999	267	267	244	244	266	266	214	214	224	224	286	286	274	274	278	278	216	216	267	267	207	207	336	336	208	208	300	300	304	304
1121	1121_2	HOR8841	Hordeum vulgare L. convar. vulgare var. hybernum Viborg	6	H		Spain	351	351	201	201	202	202	174	174	174	174	250	250	267	267	246	246	264	264	214	214	224	224	286	286	274	274	276	276	213	213	267	267	210	210	336	336	208	208	296	296	302	302
1122	1122_1	HOR8842	Hordeum vulgare L. convar. vulgare var. hybernum Viborg	6	H		Spain	261	261	201	201	204	204	174	174	174	174	250	250	264	264	244	244	266	266	214	214	224	224	286	286	274	274	278	278	216	216	258	258	207	207	336	336	208	208	296	296	302	302
1123	1123_3	HOR8843	Hordeum vulgare L. convar. vulgare var. hybernum Viborg	6	H		Spain	351	351	204	204	202	202	174	174	165	165	250	250	267	267	246	246	264	264	212	212	224	224	286	286	274	274	276	276	216	216	267	267	213	213	345	345	208	208	296	296	302	302
1124	1124_3	HOR8844	Hordeum vulgare L. convar. vulgare var. parallelum Körn.	6	H		Spain	351	351	201	201	200	200	174	174	165	165	262	262	264	264	246	246	262	262	214	214	224	224	286	286	274	274	278	278	210	210	264	264	213	213	336	336	208	208	300	300	302	302
1125	1125_3	HOR8845	Hordeum vulgare L. convar. vulgare var. hybernum Viborg	6	H		Spain	261	261	201	201	202	202	174	174	174	174	238	238	264	264	246	246	264	264	212	212	228	228	284	284	282	282	282	282	216	216	258	258	210	210	351	351	204	204	296	296	300	300
1126	1126_2	HOR8846	Hordeum vulgare L. convar. vulgare var. hybernum Viborg	6	H		Spain	351	351	201	201	202	202	177	177	165	165	250	250	264	264	244	244	256	256	212	212	224	224	286	286	274	274	276	276	213	213	267	267	213	213	336	336	208	208	296	296	304	304
1127	1127_3	HOR8847	Hordeum vulgare L. convar. vulgare var. hybernum Viborg	6	H		Spain	261	261	201	201	202	202	177	177	165	165	250	250	264	264	244	244	264	264	212	212	224	224	286	286	274	274	276	276	213	213	267	267	213	213	336	336	204	204	296	296	304	304
1128	1128_1	HOR8848	Hordeum vulgare L. convar. vulgare var. hybernum Viborg	6	H		Spain	351	351	201	201	202	202	177	177	165	165	254	254	267	267	244	244	264	264	212	212	224	224	286	286	274	274	276	276	213	213	267	267	213	213	336	336	204	204	296	296	304	304
1129	1129_3	HOR8849	Hordeum vulgare L. convar. vulgare var. hybernum Viborg	6	H		Spain	351	351	201	201	202	202	177	177	165	165	238	238	264	264	244	244	264	264	212	212	224	224	286	286	274	274	276	276	213	213	267	267	207	207	336	336	208	208	296	296	304	304
1130	1130_2	HOR8850	Hordeum vulgare L. convar. vulgare var. parallelum Körn.	6	H		Spain	351	351	201	201	202	202	177	177	162	162	250	250	264	264	244	244	256	256	212	212	224	224	286	286	274	274	278	278	213	213	267	267	207	207	336	336	208	208	296	296	304	304
1132	1132_2	HOR8852	Hordeum vulgare L. convar. vulgare var. hybernum Viborg	6	H		Spain	351	351	201	201	202	202	165	174	165	165	218	218	267	267	246	246	264	264	212	212	228	228	290	290	274	274	278	278	216	216	267	267	210	210	336	336	208	208	292	292	294	294
1134	1134_1	HOR9791	Hordeum vulgare L. convar. vulgare var. hybernum Viborg	6	H		Spain	351	351	201	201	200	200	174	174	174	174	230	230	267	267	244	244	256	256	214	214	228	228	286	286	274	274	278	278	213	213	267	267	207	207	336	336	208	208	300	300	304	304
1135	1135_1	HOR9792	Hordeum vulgare L. convar. vulgare var. hybernum Viborg	6	H		Spain	351	351	195	195	200	200	177	177	165	165	262	262	264	264	246	246	262	262	212	212	228	228	286	286	274	274	276	276	216	216	267	267	213	213	336	336	204	204	296	296	302	302
1136	1136_1	HOR11187	Hordeum vulgare L. convar. vulgare var. hybernum Viborg	6	H		Spain	351	351	201	201	202	202	177	177	165	165	250	250	267	267	246	246	256	266	212	212	224	224	286	286	274	274	278	278	216	216	267	267	210	210	336	336	212	212	300	300	294	294
1137	1137_2	HOR13887	Hordeum vulgare L. convar. vulgare var. hybernum Viborg	6	H		Spain	-99999	-99999	195	195	200	200	174	174	174	174	230	230	267	267	246	246	264	264	-99999	-99999	224	224	286	286	274	274	276	276	216	216	267	267	207	207	336	336	208	208	296	296	304	304
1138	1138_1	HOR13926	Hordeum vulgare L. convar. vulgare var. hybernum Viborg	6	H		Spain	351	351	201	201	200	200	174	174	174	174	234	250	264	264	244	244	256	256	214	214	224	224	286	286	274	274	278	278	210	210	267	267	210	210	336	336	208	208	296	296	294	294
1139	1139_1	HOR13931	Hordeum vulgare L. convar. vulgare var. hybernum Viborg	6	H		Spain	351	351	201	201	200	200	174	174	165	165	254	254	264	264	244	244	256	256	214	214	224	224	286	286	274	274	276	276	216	216	267	267	210	210	336	336	208	208	300	300	294	294
1140	1140_1	HOR13932	Hordeum vulgare L. convar. vulgare var. hybernum Viborg	6	H		Spain	261	261	195	195	218	218	174	174	174	174	262	262	264	264	244	244	252	264	212	212	224	224	288	288	274	274	278	278	216	216	267	267	207	207	351	351	204	212	296	296	294	294
1141	1141_1	HOR13946	Hordeum vulgare L. convar. vulgare var. hybernum Viborg	6	H		Spain	351	351	201	201	194	194	174	174	-99999	-99999	-99999	-99999	267	267	244	244	266	266	-99999	-99999	224	224	286	286	274	274	278	278	216	216	267	267	210	210	336	336	204	212	300	300	294	294
1142	1142_1	HOR13949	Hordeum vulgare L. convar. vulgare var. hybernum Viborg	6	H		Spain	261	261	195	195	200	200	174	174	174	174	222	222	267	267	244	244	264	264	214	214	224	224	286	286	274	274	278	278	210	210	267	267	210	210	336	336	208	208	296	296	294	294
1143	1143_1	HOR14382	Hordeum vulgare L. convar. vulgare var. hybernum Viborg	6	H		Spain	261	261	201	201	202	202	171	171	174	174	-99999	-99999	267	267	244	244	256	256	212	212	224	224	286	286	274	274	278	278	219	219	258	258	210	210	336	336	208	208	288	288	302	302
1144	1144_1	HOR13888	Hordeum vulgare L.	6	H		Spain	351	351	201	201	194	194	177	177	165	165	250	250	267	267	246	246	266	266	214	214	224	224	286	286	274	274	278	278	216	216	267	267	207	207	336	336	208	208	300	300	304	304
1145	1145_2	HOR13928	Hordeum vulgare L.	6	H		Spain	351	351	201	201	194	194	174	174	165	165	250	250	267	267	246	246	256	256	-99999	-99999	224	224	286	286	274	274	278	278	216	216	267	267	207	207	336	336	208	208	300	300	302	302
1146	1146_1	HOR13942	Hordeum vulgare L.	6	H		Spain	351	351	195	195	200	200	174	174	174	174	230	230	264	264	246	246	256	256	214	214	224	224	286	286	274	274	278	278	210	210	267	267	207	207	336	336	208	208	300	300	294	294
1147	1147_2	HOR216	Hordeum vulgare L. convar. vulgare var. hybernum Viborg	6	H		Sweden	261	261	195	195	200	200	174	174	174	174	266	266	267	267	246	246	266	266	212	212	228	228	284	284	274	274	274	274	210	210	258	258	210	210	336	336	208	208	296	296	294	294
1148	1148_1	HOR2349	Hordeum vulgare L. convar. vulgare var. parallelum Körn.	6	H		Switzerland	351	351	201	201	218	218	174	174	165	165	262	262	264	264	246	246	266	266	214	214	224	224	286	286	274	274	276	276	210	210	267	267	207	207	345	345	208	208	300	300	302	302
1149	1149_1	HOR12828	Hordeum vulgare L. convar. vulgare var. hybernum Viborg	6	H		Syria	351	351	195	195	200	200	177	177	165	165	254	254	267	267	244	244	258	258	-99999	-99999	224	224	286	286	274	274	278	278	210	210	270	270	207	207	336	336	208	208	296	296	294	294
1150	1150_2	HOR10985	Hordeum vulgare L. convar. vulgare var. hybernum Viborg	6	H		Tunisia	351	351	201	201	206	206	174	174	165	165	242	242	264	264	246	246	264	264	214	214	224	224	286	286	274	274	278	278	216	216	267	267	210	210	336	336	204	204	300	300	302	302
1151	1151_1	HOR11176	Hordeum vulgare L. convar. vulgare var. hybernum Viborg	6	H		Tunisia	351	351	201	201	200	200	174	174	174	174	250	250	264	264	246	246	266	266	-99999	-99999	224	224	286	286	274	274	278	278	216	216	267	267	210	210	336	336	204	204	300	300	302	302
1152	1152_1	HOR11177	Hordeum vulgare L. convar. vulgare var. hybernum Viborg	6	H		Tunisia	351	351	201	201	202	202	174	174	165	165	250	250	264	264	246	246	262	262	214	214	224	224	286	286	274	274	278	278	216	216	267	267	216	216	336	336	208	208	300	300	302	302
1153	1153_3	HOR416	Hordeum vulgare L. convar. vulgare var. hybernum Viborg	6	H		Turkey	351	351	201	201	-99999	-99999	174	174	165	165	234	234	264	264	246	246	264	264	212	212	224	224	284	284	274	274	282	282	216	216	264	264	207	207	345	345	208	208	296	296	294	294
1154	1154_1	HOR418	Hordeum vulgare L. convar. vulgare var. hybernum Viborg	6	H		Turkey	261	261	198	198	196	196	174	174	165	165	250	250	264	264	246	246	262	262	216	216	224	224	292	292	274	274	282	282	210	210	267	267	213	213	336	336	204	204	296	296	302	302
1155	1155_3	HOR420	Hordeum vulgare L. convar. vulgare var. hybernum Viborg	6	H		Turkey	261	261	201	201	206	206	174	174	174	174	234	234	267	267	246	246	254	254	212	212	228	228	284	284	274	274	280	280	210	210	264	264	213	213	336	336	216	216	296	296	294	294
1156	1156_1	HOR424	Hordeum vulgare L. convar. vulgare var. hybernum Viborg	6	H		Turkey	261	261	201	201	200	200	174	174	174	174	250	250	267	267	246	246	264	264	212	212	228	228	284	284	274	274	278	278	210	210	264	264	213	213	351	351	204	204	296	296	304	304
1157	1157_4	HOR426	Hordeum vulgare L. convar. vulgare var. hybernum Viborg	6	H		Turkey	261	261	201	201	200	200	174	174	171	171	250	250	267	267	246	246	266	266	212	212	228	228	284	284	274	274	280	280	216	216	264	264	213	213	336	351	220	220	296	296	294	294
1158	1158_1	HOR427	Hordeum vulgare L. convar. vulgare var. hybernum Viborg	6	H		Turkey	261	261	201	201	200	200	174	174	165	165	230	230	264	264	246	246	264	264	-99999	-99999	228	228	284	284	274	274	278	278	210	210	264	264	213	213	336	336	204	204	296	296	294	294
1159	1159_2	HOR433	Hordeum vulgare L. convar. vulgare var. hybernum Viborg	6	H		Turkey	261	261	201	201	206	206	174	174	165	165	230	230	264	264	246	246	254	254	212	212	228	228	284	284	274	274	278	278	210	210	264	264	210	210	351	351	208	208	296	296	304	304
1160	1160_1	HOR435	Hordeum vulgare L. convar. vulgare var. hybernum Viborg	6	H		Turkey	261	261	201	201	190	190	174	174	165	165	230	230	264	264	246	246	264	264	212	212	228	228	284	284	274	274	280	280	210	210	264	264	213	213	336	336	216	216	296	296	294	294
1161	1161_2	HOR436	Hordeum vulgare L. convar. vulgare var. hybernum Viborg	6	H		Turkey	261	261	201	201	200	200	180	180	165	165	250	250	264	264	246	246	254	254	212	212	228	228	284	284	274	274	280	280	210	210	264	264	213	213	328	328	204	204	296	296	294	294
1162	1162_2	HOR449	Hordeum vulgare L. convar. vulgare var. hybernum Viborg	6	H		Turkey	351	351	201	201	198	198	177	177	165	165	262	262	264	264	246	246	262	262	-99999	-99999	224	224	286	286	274	274	282	282	210	210	267	267	210	210	336	336	208	208	296	296	294	294
1163	1163_4	HOR451	Hordeum vulgare L. convar. vulgare var. hybernum Viborg	6	H		Turkey	261	261	201	201	200	200	180	180	165	165	250	250	267	267	246	246	254	254	-99999	-99999	228	228	284	284	274	274	282	282	210	210	267	267	210	210	336	336	216	216	296	296	304	304
1164	1164_1	HOR452	Hordeum vulgare L. convar. vulgare var. hybernum Viborg	6	H		Turkey	261	261	201	201	200	200	174	174	165	165	250	250	267	267	246	246	254	254	212	212	228	228	284	284	274	274	280	280	210	210	264	264	210	210	336	336	204	208	296	296	304	304
1165	1165_2	HOR454	Hordeum vulgare L. convar. vulgare var. hybernum Viborg	6	H		Turkey	261	261	201	201	200	200	174	174	171	171	246	246	267	267	246	246	254	254	212	212	228	228	284	284	274	274	278	278	210	210	264	264	213	213	351	351	204	204	296	296	294	294
1166	1166_2	HOR457	Hordeum vulgare L. convar. vulgare var. hybernum Viborg	6	H		Turkey	351	351	201	201	200	200	174	174	165	165	230	230	264	264	246	246	264	264	212	212	228	228	284	284	274	274	278	278	210	210	264	264	213	213	336	336	216	216	296	296	294	294
1167	1167_3	HOR460	Hordeum vulgare L. convar. vulgare var. hybernum Viborg	6	H		Turkey	261	261	201	201	200	200	174	174	165	165	246	246	264	264	246	246	266	266	212	212	224	224	284	284	274	274	278	278	210	210	264	264	210	210	336	336	208	208	296	296	294	294
1168	1168_3	HOR461	Hordeum vulgare L. convar. vulgare var. hybernum Viborg	6	H		Turkey	261	261	201	201	200	200	174	174	174	174	246	246	267	267	246	246	254	254	212	212	228	228	284	284	274	274	280	280	210	210	264	264	210	210	336	336	216	216	296	296	294	294
1169	1169_2	HOR467	Hordeum vulgare L. convar. vulgare var. hybernum Viborg	6	H		Turkey	261	261	198	198	200	200	174	174	171	171	230	230	264	264	246	246	264	264	216	216	224	224	284	284	274	274	278	278	210	210	267	267	213	213	345	345	208	208	296	296	294	294
1170	1170_2	HOR476	Hordeum vulgare L. convar. vulgare var. hybernum Viborg	6	H		Turkey	261	261	201	201	200	200	174	174	165	165	242	242	264	264	246	246	264	264	212	212	224	224	284	284	274	274	280	280	210	210	264	264	207	207	336	336	204	204	296	296	294	294
1171	1171_2	HOR477	Hordeum vulgare L. convar. vulgare var. hybernum Viborg	6	H		Turkey	261	261	201	201	200	200	174	174	165	165	234	234	264	264	246	246	268	268	214	214	224	224	286	286	274	274	278	278	216	216	267	267	207	207	345	345	208	208	296	296	302	302
1172	1172_2	HOR503	Hordeum vulgare L. convar. vulgare var. hybernum Viborg	6	H		Turkey	351	351	201	201	200	200	180	180	165	165	238	238	264	264	246	246	264	264	212	212	228	228	284	284	274	274	280	280	210	210	264	264	213	213	336	336	212	212	296	296	294	294
1173	1174_2	HOR518	Hordeum vulgare L. convar. vulgare var. hybernum Viborg	6	H		Turkey	261	261	198	198	200	200	174	174	165	165	230	230	264	264	246	246	254	254	212	212	228	228	284	284	274	274	278	278	210	210	267	267	207	207	345	345	204	204	296	296	294	294
1174	1174_2	HOR519	Hordeum vulgare L. convar. vulgare var. hybernum Viborg	6	H		Turkey	351	351	201	201	200	200	174	174	165	165	246	246	264	264	246	246	266	266	212	212	228	228	284	284	274	274	282	282	216	216	264	264	210	210	336	336	204	204	296	296	294	294
1175	1175_2	HOR539	Hordeum vulgare L. convar. vulgare var. hybernum Viborg	6	H		Turkey	261	261	201	201	222	222	174	174	165	165	242	242	264	264	246	246	264	264	212	212	228	228	284	284	274	274	274	274	210	210	264	264	210	210	336	336	204	204	296	296	302	302
1176	1176_2	HOR540	Hordeum vulgare L. convar. vulgare var. hybernum Viborg	6	H		Turkey	261	261	201	201	200	200	174	174	174	174	250	250	264	264	246	246	264	264	212	212	228	228	284	284	274	274	280	280	210	210	264	264	207	207	336	336	204	204	296	296	294	294
1177	1177_2	HOR544	Hordeum vulgare L. convar. vulgare var. hybernum Viborg	6	H		Turkey	261	261	201	201	200	200	174	174	174	174	250	250	264	264	246	246	264	264	212	212	228	228	284	284	274	274	280	280	210	210	264	264	207	207	336	336	204	204	296	296	294	294
1178	1178_1	HOR551	Hordeum vulgare L. convar. vulgare var. hybernum Viborg	6	H		Turkey	351	351	201	201	202	202	174	174	165	165	230	230	264	264	246	246	256	256	212	212	224	224	286	286	274	274	278	278	216	216	258	258	213	213	336	336	204	204	300	300	304	304
1179	1179_1	HOR568	Hordeum vulgare L. convar. vulgare var. hybernum Viborg	6	H		Turkey	261	261	201	201	200	200	174	174	165	165	250	250	264	264	246	246	264	264	214	214	228	228	284	284	274	274	280	280	210	210	267	267	207	207	336	336	208	208	296	296	304	304
1180	1180_1	HOR571	Hordeum vulgare L. convar. vulgare var. hybernum Viborg	6	H		Turkey	261	261	201	201	-99999	-99999	174	174	174	174	250	250	264	264	246	246	264	264	212	212	228	228	284	284	274	274	280	280	210	210	264	264	210	210	336	336	208	208	296	296	294	294
1181	1181_1	HOR578	Hordeum vulgare L. convar. vulgare var. hybernum Viborg	6	H		Turkey	261	261	201	201	202	202	174	174	165	165	230	230	264	264	246	246	264	264	218	218	224	224	292	292	274	274	276	276	210	210	264	264	213	213	336	336	208	208	296	296	302	302
1182	1182_1	HOR591	Hordeum vulgare L. convar. vulgare var. hybernum Viborg	6	H		Turkey	261	261	201	201	198	198	174	174	165	165	234	234	264	264	246	246	254	254	212	212	228	228	284	284	274	274	278	278	216	216	264	264	213	213	336	336	216	216	300	300	294	294
1183	1183_2	HOR625	Hordeum vulgare L. convar. vulgare var. hybernum Viborg	6	H		Turkey	351	351	201	201	200	200	174	174	165	165	234	234	264	264	246	246	264	264	-99999	-99999	228	228	284	284	274	274	278	278	210	210	267	267	210	210	336	336	216	216	296	296	294	294
1184	1184_1	HOR635	Hordeum vulgare L. convar. vulgare var. hybernum Viborg	6	H		Turkey	261	261	201	201	206	206	174	174	165	165	246	246	267	267	246	246	254	254	-99999	-99999	224	224	284	284	274	274	282	282	210	210	264	264	207	207	336	336	208	208	296	296	294	294
1185	1185_1	HOR884	Hordeum vulgare L. convar. vulgare var. hybernum Viborg	6	H		Turkey	261	261	201	201	202	202	174	174	165	165	250	250	264	264	246	246	254	254	-99999	-99999	228	228	284	284	274	274	282	282	210	210	267	267	210	210	336	336	208	208	296	296	304	304
1186	1186_1	HOR887	Hordeum vulgare L. convar. vulgare var. hybernum Viborg	6	H		Turkey	261	261	201	201	202	202	174	174	165	165	250	250	264	264	246	246	264	264	-99999	-99999	228	228	284	284	274	274	280	280	210	210	264	264	210	210	336	336	208	208	296	296	304	304
1187	1187_1	HOR889	Hordeum vulgare L. convar. vulgare var. hybernum Viborg	6	H		Turkey	351	351	201	201	202	202	174	174	165	165	266	266	264	264	246	246	266	266	-99999	-99999	228	228	294	294	274	274	278	278	213	213	270	270	210	210	351	351	208	208	296	296	302	302
1188	1188_1	HOR890	Hordeum vulgare L. convar. vulgare var. hybernum Viborg	6	H		Turkey	261	261	201	201	202	202	180	180	174	174	258	258	264	264	-99999	-99999	254	254	214	214	228	228	284	284	274	274	280	280	210	210	264	264	210	210	336	336	204	204	296	296	294	294
1189	1189_1	HOR891	Hordeum vulgare L. convar. vulgare var. hybernum Viborg	6	H		Turkey	261	261	201	201	200	200	180	180	165	165	250	250	267	267	246	246	254	254	210	210	228	228	284	284	274	274	282	282	210	210	264	264	207	207	336	336	196	204	296	296	294	294
1190	1190_1	HOR899	Hordeum vulgare L. convar. vulgare var. hybernum Viborg	6	H		Turkey	261	261	201	201	200	200	180	180	174	174	250	250	264	264	246	246	254	254	212	212	228	228	284	284	274	274	280	280	210	210	267	267	213	213	336	336	204	204	296	296	294	294
1191	1191_1	HOR907	Hordeum vulgare L. convar. vulgare var. hybernum Viborg	6	H		Turkey	261	261	201	201	206	206	174	174	174	174	218	218	264	264	246	246	264	264	214	214	228	228	284	284	274	274	280	280	210	210	264	264	210	210	351	351	208	208	296	296	304	304
1192	1192_1	HOR1177	Hordeum vulgare L. convar. vulgare var. hybernum Viborg	6	H		Turkey	351	351	198	198	200	200	174	174	165	165	262	262	264	264	244	244	264	264	212	212	228	228	286	286	274	274	280	280	213	213	267	267	213	213	336	336	212	212	296	296	294	294
1193	1193_3	HOR1182	Hordeum vulgare L. convar. vulgare var. hybernum Viborg	6	H		Turkey	351	351	201	201	202	202	174	174	165	165	246	246	264	264	246	246	262	262	214	214	224	224	290	290	274	274	278	278	210	210	267	267	213	213	336	336	204	204	296	296	302	302
1194	1194_1	HOR1184	Hordeum vulgare L. convar. vulgare var. hybernum Viborg	6	H		Turkey	261	261	201	201	200	200	174	174	174	174	234	234	264	264	246	246	268	268	-99999	-99999	224	224	284	284	274	274	278	278	216	216	258	258	207	207	345	345	208	208	300	300	302	302
1195	1195_2	HOR1187	Hordeum vulgare L. convar. vulgare var. hybernum Viborg	6	H		Turkey	351	351	201	201	200	200	174	174	165	165	266	266	264	264	246	246	266	266	214	214	224	224	292	292	274	274	274	274	213	213	267	267	210	210	345	345	204	204	288	288	302	302
1196	1196_1	HOR1192	Hordeum vulgare L. convar. vulgare var. hybernum Viborg	6	H		Turkey	351	351	201	201	228	228	177	177	165	165	262	262	264	264	246	246	256	256	212	212	228	228	292	292	274	274	280	280	213	213	270	270	207	207	345	345	208	212	300	300	302	302
1197	1197_4	HOR1250	Hordeum vulgare L. convar. vulgare var. hybernum Viborg	6	H		Turkey	351	351	201	201	202	202	174	174	165	165	254	254	264	264	246	246	252	266	212	212	228	228	292	292	274	274	278	278	213	213	270	270	216	216	339	339	200	204	288	288	302	302
1198	1198_2	HOR1466	Hordeum vulgare L. convar. vulgare var. densum Sér.	6	H		Turkey	261	261	201	201	200	200	174	174	165	165	218	218	264	264	246	246	254	254	212	212	228	228	284	284	274	274	278	278	210	210	267	267	213	213	336	336	212	212	296	296	294	294
1199	1199_2	HOR1891	Hordeum vulgare L. convar. vulgare var. hybernum Viborg	6	H		Turkey	351	351	198	198	202	202	174	174	165	165	218	218	264	264	246	246	254	254	212	212	224	224	290	290	274	274	278	278	213	213	267	267	213	213	336	336	208	208	296	296	302	302
1200	1200_1	HOR2405	Hordeum vulgare L. convar. vulgare var. parallelum Körn.	6	H		Turkey	261	261	201	201	200	200	174	174	165	165	218	218	264	264	246	246	254	254	212	212	228	228	284	284	274	274	278	278	210	210	267	267	213	213	336	336	212	212	296	296	294	294
1201	1201_3	HOR4727	Hordeum vulgare L. convar. vulgare var. densum Sér.	6	H		Turkey	261	261	201	201	200	200	180	180	165	165	250	250	264	264	246	246	264	264	212	212	228	228	284	284	274	274	280	280	210	210	264	264	213	213	336	336	204	204	296	296	294	294
1202	1202_1	HOR9536	Hordeum vulgare L. convar. vulgare var. coerulescens Sér.	6	H		Turkey	261	261	201	201	200	200	162	174	165	165	222	230	264	264	246	246	266	266	212	212	228	228	284	284	274	274	276	276	210	210	264	264	207	207	336	336	196	196	296	296	294	294
1203	1203_3	HOR194	Hordeum vulgare L. convar. vulgare var. hybernum Viborg	6	H		Ukraine	261	261	201	201	200	200	174	174	171	171	250	250	267	267	246	246	266	266	212	212	228	228	284	284	274	274	278	278	216	216	264	264	213	213	351	351	220	220	296	296	294	294
1204	1204_1	HOR4477	Hordeum vulgare L. convar. vulgare var. hybernum Viborg	6	H		Ukraine	261	261	201	201	202	202	174	174	174	174	238	238	264	264	246	246	254	254	212	212	224	224	284	284	274	274	278	278	210	210	258	258	210	210	351	351	212	212	296	296	294	294
1205	1205_2	HOR7396	Hordeum vulgare L. convar. vulgare var. parallelum Körn.	6	H		Ukraine	261	261	192	192	204	204	177	177	165	165	238	238	267	267	244	244	254	254	214	214	228	228	290	290	282	282	280	280	210	210	267	267	210	210	336	336	212	212	296	296	294	294
1206	1206_1	HOR742	Hordeum vulgare L. convar. vulgare var. hybernum Viborg	6	H		Yugoslavia	261	261	201	201	204	204	174	174	174	174	230	230	267	267	246	246	252	252	212	212	228	228	284	284	274	274	274	274	210	210	264	264	210	210	336	336	204	208	296	296	294	294
1207	1207_3	HOR751	Hordeum vulgare L. convar. vulgare var. hybernum Viborg	6	H		Yugoslavia	261	261	201	201	202	202	174	174	174	174	230	230	267	267	246	246	264	264	212	212	228	228	284	284	274	274	280	280	210	210	267	267	210	210	-99999	-99999	212	212	296	296	294	294
1208	1208_2	HOR1282	Hordeum vulgare L. convar. vulgare var. hybernum Viborg	6	H		Yugoslavia	261	261	201	201	190	190	174	174	165	165	218	218	264	264	246	246	254	254	212	212	224	224	284	284	274	274	274	274	210	210	267	267	210	210	-99999	-99999	204	204	296	296	294	294
1209	1209_3	BCC1354	Hordeum vulgare L. convar. vulgare var. hybernum Viborg	6	H		Yugoslavia	261	261	201	201	190	190	174	174	165	165	230	230	267	267	246	246	252	252	212	212	228	228	284	284	274	274	280	280	210	210	264	264	210	210	336	336	212	220	296	296	294	294
1210	1210_3	HOR10048	Hordeum vulgare L. convar. vulgare var. hybernum Viborg	6	H		Yugoslavia	351	351	201	201	202	202	177	177	165	165	230	230	264	264	246	246	254	254	212	212	228	228	286	286	274	274	278	278	216	216	267	267	210	210	336	336	208	208	300	300	294	294
1211	1211_2	HOR5720	Hordeum vulgare L.	6	H	deficiens	Ethiopia	351	351	192	192	200	200	177	177	174	174	230	230	264	264	244	244	266	266	214	214	224	224	286	286	276	276	280	280	216	216	267	267	210	210	345	345	200	200	296	296	302	302
1212	1212_2	HOR5895	Hordeum vulgare L. convar. deficiens (Steud.) Mansf. var. zeocrithideficiens (Vavilov) Mansf.	2	H	deficiens	Ethiopia	351	351	192	192	196	196	177	177	174	174	230	230	264	264	246	246	264	264	214	214	224	224	290	290	276	276	280	280	216	216	267	267	210	210	345	345	200	200	296	296	302	302
1213	1213_3	HOR5897	Hordeum vulgare L. convar. deficiens (Steud.) Mansf. var. copticum (Vavilov) Mansf.	2	H	deficiens	Ethiopia	351	351	192	192	198	198	174	174	174	174	230	230	264	264	246	246	264	264	216	216	224	224	286	286	-99999	-99999	280	280	216	216	267	267	210	210	-99999	-99999	200	200	296	296	302	302
1214	1214_2	HOR6460	Hordeum vulgare L. convar. deficiens (Steud.) Mansf. var. africanum (Vavilov) Mansf.	2	H	deficiens	Ethiopia	351	351	195	195	200	200	177	177	174	174	230	230	264	264	244	244	266	266	214	214	224	224	290	290	284	284	280	280	216	216	267	267	210	210	-99999	-99999	200	200	296	296	302	302
1215	1215_2	HOR6524	Hordeum vulgare L. convar. deficiens (Steud.) Mansf. var. seringei Körn.	2	H	deficiens	Ethiopia	351	351	192	192	200	200	177	177	174	174	230	230	264	264	246	246	256	256	214	214	224	224	286	286	282	282	280	280	213	213	267	267	204	204	-99999	-99999	200	200	296	296	302	302
1216	1216_2	HOR6902	Hordeum vulgare L. convar. deficiens (Steud.) Mansf. var. tridax Körn.	2	H	deficiens	Ethiopia	351	351	201	201	202	202	183	183	174	174	230	230	264	264	244	244	256	256	214	214	224	224	286	286	274	274	276	276	216	216	267	267	204	204	-99999	-99999	216	216	296	296	294	294
1217	1217_2	HOR7885	Hordeum vulgare L. convar. deficiens (Steud.) Mansf. var. pseudoabyssinicum (Körn.) Mansf.	2	H	deficiens	Ethiopia	351	351	192	192	200	200	177	177	174	174	230	230	264	264	246	246	264	264	214	214	228	228	290	290	282	282	280	280	213	213	267	267	210	210	336	336	200	200	296	296	302	302
1218	1218_1	HOR7891	Hordeum vulgare L. convar. deficiens (Steud.) Mansf. var. abyssinicum (Sér.) Körn.	2	H	deficiens	Ethiopia	351	351	192	192	200	200	177	177	174	174	218	230	264	264	244	244	266	266	214	214	228	228	290	290	282	282	280	280	213	213	267	267	210	210	336	336	200	200	296	296	302	302
1219	1219_3	HOR10334	Hordeum vulgare L. convar. deficiens (Steud.) Mansf. var. steudelii Körn.	2	H	deficiens	Ethiopia	351	351	192	192	200	200	177	177	174	174	230	230	264	264	246	246	264	264	214	214	228	228	286	286	282	282	280	280	216	216	267	267	204	204	345	345	200	208	296	296	302	302
1220	1220_1	HOR10800	Hordeum vulgare L. convar. deficiens (Steud.) Mansf. var. deficiens (Steud.) Körn.	2	H	deficiens	Ethiopia	351	351	195	195	202	202	177	177	174	174	230	230	264	264	246	246	264	264	214	214	224	224	286	286	282	282	280	280	216	216	267	267	210	210	345	345	200	200	296	296	302	302
1221	1221_4	HOR359	Hordeum vulgare L. convar. deficiens (Steud.) Mansf. var. triceros Körn.	2	H	deficiens	Germany	351	351	210	210	202	202	180	180	174	174	230	230	264	264	244	244	256	256	214	214	224	224	286	286	282	282	280	280	213	213	267	267	210	210	351	351	208	208	296	296	294	294
1222	1222_2	HOR1612	Hordeum vulgare L. convar. deficiens (Steud.) Mansf. var. steudelii Körn.	2	H	deficiens	Germany	351	351	192	192	192	192	183	183	174	174	230	230	267	267	244	244	264	264	214	214	228	228	290	290	276	276	276	276	213	213	258	258	210	210	351	351	200	200	296	296	302	302
1224	1224_1	HOR6039	Hordeum vulgare L. convar. labile (Schiem.) Mansf. var. nigripallidum-steudelii	2	H	labile	Ethiopia	351	351	192	192	200	200	177	177	174	174	230	230	264	264	244	244	264	264	214	214	224	224	290	290	282	282	280	280	216	216	267	267	204	204	-99999	-99999	200	200	296	296	302	302
1225	1225_1	HOR6514	Hordeum vulgare L. convar. labile (Schiem.) Mansf. var. steudelii-nigrum	2	H	labile	Ethiopia	351	351	192	192	202	202	177	177	174	174	230	230	264	264	244	244	264	264	214	214	224	224	290	290	282	282	280	280	216	216	267	267	210	210	-99999	-99999	200	200	296	296	302	302
1226	1226_1	HOR10336	Hordeum vulgare L. convar. labile (Schiem.) Mansf. var. coerulescens-deficiens	2	H	labile	Ethiopia	351	351	192	192	200	200	177	177	174	174	230	230	264	264	246	246	266	266	214	214	224	224	286	286	282	282	280	280	216	216	267	267	210	210	345	345	200	200	296	296	302	302
1227	1227_2	HOR10421	Hordeum vulgare L. convar. labile (Schiem.) Mansf. var. deficiens-hybernum	2	H	labile	Ethiopia	351	351	192	192	202	202	177	177	174	174	234	234	264	264	246	246	264	264	214	214	224	224	286	286	276	276	280	280	216	216	267	267	210	210	-99999	-99999	200	200	296	296	302	302
1228	1228_1	HOR10455	Hordeum vulgare L. convar. labile (Schiem.) Mansf. var. subviolaceum-deficiens	2	H	labile	Ethiopia	351	351	192	192	200	200	168	177	174	174	230	230	264	264	246	246	266	266	214	214	224	224	290	290	282	282	280	280	216	216	267	267	210	210	339	339	200	200	296	296	302	302
1229	1229_1	HOR10515	Hordeum vulgare L. convar. labile (Schiem.) Mansf. var. hybernum-deficiens	2	H	labile	Ethiopia	351	351	192	192	200	200	177	177	174	174	230	230	264	264	246	246	-99999	-99999	214	214	224	224	286	286	282	282	280	280	216	216	267	267	-99999	-99999	345	345	200	200	296	296	302	302
1230	1230_1	HOR10759	Hordeum vulgare L. convar. labile (Schiem.) Mansf. var. nigrum-steudelii	2	H	labile	Ethiopia	351	351	192	192	202	202	177	177	174	174	202	202	264	264	246	246	264	264	214	214	224	224	286	286	282	282	276	276	216	216	267	267	210	210	345	345	200	200	296	296	302	302
1231	1231_2	HOR1564	Hordeum vulgare L. convar. intermedium (Körn.) Mansf.	2	n	intermedium	Afghanistan	261	261	210	210	214	214	168	180	174	174	250	250	267	267	244	244	266	266	214	214	224	224	286	286	276	276	276	276	216	216	258	258	207	207	351	351	200	200	290	290	294	294
1232	1232_1	HOR5490	Hordeum vulgare L. convar. intermedium (Körn.) Mansf. var. mortoni (Körn.) Mansf.	2	H	intermedium	Ethiopia	-99999	-99999	192	192	200	200	177	177	174	174	230	230	264	264	246	246	264	264	214	214	224	224	286	286	282	282	280	280	216	216	267	267	210	210	336	336	200	200	296	296	302	302
1233	1233_1	HOR5912	Hordeum vulgare L. convar. intermedium (Körn.) Mansf. var. mortoni (Körn.) Mansf.	2	H	intermedium	Ethiopia	351	351	192	192	200	200	177	177	174	174	230	230	264	264	-99999	-99999	256	256	214	214	224	224	290	290	276	276	280	280	216	216	267	267	204	204	345	345	200	204	296	296	302	302
1234	1234_1	HOR10273	Hordeum vulgare L. convar. intermedium (Körn.) Mansf. var. atterbergii Körn.	2	H	intermedium	Ethiopia	351	351	192	192	200	200	177	177	174	174	230	230	264	264	244	244	266	266	214	214	224	224	290	290	282	282	280	280	216	216	267	267	210	210	339	339	200	200	296	296	302	302
1235	1235_2	HOR10274	Hordeum vulgare L. convar. intermedium (Körn.) Mansf. var. atterbergii Körn.	2	H	intermedium	Ethiopia	351	351	192	192	200	200	168	177	174	174	222	222	264	264	244	244	266	266	214	214	224	224	290	290	282	282	280	280	216	216	267	267	210	210	339	339	200	200	296	296	302	302
1236	1236_4	HOR10958	Hordeum vulgare L.	2	H		Algeria	351	351	195	195	206	206	174	174	174	174	226	226	264	264	246	246	264	264	214	214	224	224	286	286	274	274	276	276	216	216	267	267	210	210	345	345	208	208	300	300	302	302
1237	1237_1	HOR10952	Hordeum vulgare L.	2	H		Austria	351	351	195	195	200	200	174	174	174	174	218	218	264	264	246	246	254	254	212	212	224	224	284	284	282	282	282	282	213	213	267	267	207	207	351	351	208	208	296	296	294	294
1238	1238_1	HOR10953	Hordeum vulgare L.	2	H		Austria	351	351	195	195	200	200	177	177	174	174	222	222	264	264	244	244	254	254	212	212	228	228	286	286	282	282	280	280	213	213	258	258	210	210	336	336	208	208	296	296	304	304
1239	1239_2	HOR10954	Hordeum vulgare L.	2	H		Austria	-99999	-99999	195	195	202	202	177	177	174	174	222	222	264	264	244	244	254	254	212	212	228	228	286	286	282	282	280	280	213	213	258	258	210	210	336	336	208	208	296	296	304	304
1240	1240_1	HOR10879	Hordeum vulgare L.	2	H		Georgia	-99999	-99999	195	195	200	200	180	180	174	174	230	230	267	267	246	246	254	254	214	214	228	228	290	290	282	282	280	280	219	219	258	258	207	207	351	351	208	208	296	296	302	302
1241	1241_2	HOR10886	Hordeum vulgare L.	2	H		Georgia	351	351	201	201	198	198	177	177	174	174	230	230	264	264	244	244	264	264	214	214	224	224	290	290	282	282	278	278	213	213	267	267	210	210	351	351	204	204	296	296	302	302
1242	1242_2	HOR10889	Hordeum vulgare L.	2	H		Georgia	351	351	201	201	212	212	174	174	174	174	234	234	267	267	244	244	254	254	214	214	224	224	290	290	274	274	280	280	213	213	264	264	207	207	351	351	208	220	296	296	304	304
1243	1243_1	HOR10892	Hordeum vulgare L.	2	H		Georgia	351	351	210	210	212	212	177	177	174	174	262	262	267	267	244	244	264	264	214	214	228	228	290	290	282	282	280	280	213	213	264	264	213	213	351	351	208	208	296	296	302	302
1244	1244_2	HOR10893	Hordeum vulgare L.	2	H		Georgia	351	351	210	210	216	216	174	174	174	174	254	254	267	267	244	244	264	264	214	214	224	224	284	284	282	282	280	280	213	213	264	264	213	213	336	336	208	208	296	296	302	302
1245	1245_2	HOR10894	Hordeum vulgare L.	6	H		Georgia	261	261	195	195	200	200	174	174	165	165	262	262	267	267	246	246	264	264	212	212	228	228	284	284	274	274	276	276	210	210	267	267	210	210	351	351	212	212	300	300	294	294
1246	1246_1	HOR10895	Hordeum vulgare L.	6	H		Georgia	351	351	210	210	212	212	174	174	174	174	218	218	267	267	244	244	264	264	214	214	224	224	290	290	284	284	280	280	213	213	264	264	210	210	351	351	204	204	296	296	302	302
1247	1247_2	HOR10896	Hordeum vulgare L.	2	H		Georgia	351	351	210	210	200	200	177	177	174	174	230	230	267	267	244	244	264	264	214	214	224	224	290	290	274	274	276	276	213	213	264	264	210	210	351	351	204	204	296	296	302	302
1248	1248_1	HOR10898	Hordeum vulgare L.	2	H		Georgia	351	351	210	210	220	220	177	177	174	174	262	262	267	267	244	244	264	264	214	214	224	224	284	284	274	274	280	280	213	213	264	264	210	210	351	351	204	204	296	296	302	302
1249	1249_2	HOR10899	Hordeum vulgare L.	2	H		Georgia	351	351	210	210	212	212	177	177	174	174	230	230	267	267	244	244	264	264	214	214	224	224	284	284	284	284	276	276	213	213	264	264	213	213	336	336	204	204	296	296	302	302
1250	1250_1	HOR10974	Hordeum vulgare L.	2	H		Georgia	351	351	201	201	204	204	174	174	174	174	230	230	267	267	244	244	254	254	214	214	224	224	292	292	274	274	280	280	213	213	264	264	210	210	351	351	204	204	296	296	294	294
1251	1251_2	HOR10957	Hordeum vulgare L.	2	H		Norway	351	351	195	195	188	202	162	174	174	174	238	238	264	264	244	244	254	254	214	214	228	228	286	286	282	282	280	280	216	216	258	258	210	210	351	351	204	204	296	296	302	302
1252	1252_2	HOR10901	Hordeum vulgare L.	2	H		Russia	351	351	201	201	212	212	174	174	174	174	226	226	267	267	244	244	254	254	214	214	224	224	292	292	274	274	280	280	213	213	264	264	210	210	351	351	208	208	296	296	304	304
1253	1253_3	HOR10902	Hordeum vulgare L.	2	H		Russia	344	344	210	210	212	212	177	177	174	174	202	202	264	264	244	244	264	264	214	214	224	224	284	284	274	274	280	280	213	213	264	264	210	210	351	351	204	204	296	296	302	302
1254	1254_2	HOR10903	Hordeum vulgare L.	2	H		Russia	351	351	195	195	200	200	183	183	174	174	238	238	264	264	244	244	254	254	214	214	228	228	290	290	282	282	280	280	216	216	258	258	210	210	351	351	212	212	296	296	302	302
1255	1255_2	HOR8487	Hordeum vulgare L.	2	H		Slovakia	351	351	195	195	192	192	183	183	174	174	238	238	264	264	244	244	254	254	214	214	228	228	290	290	282	282	280	280	216	216	258	258	210	210	345	345	212	212	296	296	302	302
1256	1256_2	BCC1586	Hordeum vulgare L.	6	H		Spain	351	351	201	201	200	200	174	174	165	165	262	262	264	264	246	246	262	262	214	214	224	224	286	286	274	274	276	276	210	210	264	264	213	213	336	336	208	208	300	300	302	302
1257	1257_3	HOR1431	Hordeum vulgare L. convar. distichon (L.) Alef. var. nudum (L.) Alef.	2	n		Afghanistan	336	336	195	195	218	218	177	177	174	174	258	258	267	267	244	244	254	254	212	212	224	224	290	290	274	274	276	276	213	213	264	264	210	210	351	351	200	200	296	296	302	302
1258	1258_4	HOR3777	Hordeum vulgare L. convar. distichon (L.) Alef. var. nudum (L.) Alef.	2	n		Austria	336	336	195	195	220	220	177	177	174	174	258	258	267	267	244	244	256	256	214	214	228	228	290	290	274	274	276	276	213	213	264	264	210	210	351	351	200	200	288	288	302	302
1259	1259_3	HOR3965	Hordeum vulgare L. convar. distichon (L.) Alef. var. nudum (L.) Alef.	2	n		Austria	351	351	195	195	210	210	180	180	165	165	266	266	264	264	244	244	254	254	214	214	224	224	286	286	278	278	276	276	216	216	264	264	207	207	336	336	212	212	296	296	294	294
1260	1260_3	HOR3773	Hordeum vulgare L. convar. distichon (L.) Alef. var. nudum (L.) Alef.	2	n		CSFR	336	336	-99999	-99999	218	218	174	174	174	174	254	254	267	267	244	244	256	256	214	214	228	228	290	290	274	274	-99999	-99999	213	213	264	264	210	210	351	351	200	200	-99999	-99999	302	302
1261	1261_2	HOR9578	Hordeum vulgare L. convar. distichon (L.) Alef. var. nudum (L.) Alef.	2	n		CSFR	261	261	195	195	196	196	180	180	165	165	266	266	264	264	244	244	254	254	214	214	224	224	286	286	278	278	280	280	216	216	264	264	207	207	336	336	212	212	296	296	302	302
1262	1262_1	HOR9579	Hordeum vulgare L. convar. distichon (L.) Alef. var. nudum (L.) Alef.	2	n		CSFR	336	336	195	195	218	218	177	177	174	174	258	258	267	267	244	244	256	256	214	214	228	228	290	290	274	274	276	276	213	213	264	264	210	210	351	351	196	196	288	288	302	302
1263	1263_3	HOR14336	Hordeum vulgare L. convar. distichon (L.) Alef. var. nudum (L.) Alef.	2	n		CSFR	336	336	195	195	218	218	177	177	174	174	254	254	267	267	244	244	256	256	214	214	228	228	290	290	274	274	276	276	213	213	264	264	210	210	351	351	200	200	288	288	302	302
1264	1264_2	HOR4944	Hordeum vulgare L. convar. distichon (L.) Alef. var. nudum (L.) Alef.	2	n		Czech	261	261	195	195	196	196	180	180	174	174	258	258	267	267	244	244	264	264	214	214	224	224	290	290	274	274	276	276	213	213	264	264	207	207	336	336	200	200	288	288	302	302
1265	1265_3	HOR4945	Hordeum vulgare L. convar. distichon (L.) Alef. var. nudum (L.) Alef.	2	n		Czech	261	261	195	195	218	218	177	177	174	174	258	258	267	267	244	244	264	264	214	214	224	224	290	290	274	274	276	276	213	213	264	264	207	207	336	336	200	200	288	288	302	302
1266	1266_1	HOR7384	Hordeum vulgare L. convar. distichon (L.) Alef. var. nudum (L.) Alef.	2	n		Czech	261	261	195	195	218	218	177	177	174	174	258	258	267	267	244	244	264	264	214	214	224	224	290	290	274	274	276	276	213	213	264	264	207	207	336	336	200	208	288	288	302	302
1267	1267_2	HOR7385	Hordeum vulgare L. convar. distichon (L.) Alef. var. nudum (L.) Alef.	2	n		Czech	261	261	195	195	218	218	177	177	174	174	258	258	267	267	244	244	264	264	214	214	224	224	290	290	274	274	276	276	213	213	264	264	207	207	336	336	200	212	288	288	302	302
1268	1268_2	HOR7386	Hordeum vulgare L. convar. distichon (L.) Alef. var. nudum (L.) Alef.	2	n		Czech	261	261	195	195	218	218	177	177	174	174	258	258	267	267	244	244	264	264	214	214	224	224	290	290	274	274	276	276	213	213	264	264	207	207	336	336	200	200	288	288	302	302
1269	1269_2	HOR7387	Hordeum vulgare L. convar. distichon (L.) Alef. var. nudum (L.) Alef.	2	n		Czech	261	261	-99999	-99999	196	196	180	180	174	174	258	258	267	267	244	244	264	264	214	214	224	224	290	290	274	274	-99999	-99999	213	213	264	264	207	207	336	336	200	200	-99999	-99999	302	302
1270	1270_1	HOR7438	Hordeum vulgare L. convar. distichon (L.) Alef. var. nudum (L.) Alef.	2	n		Czech	261	261	195	195	218	218	177	177	174	174	258	258	267	267	244	244	264	264	214	214	224	224	290	290	274	274	276	276	213	213	264	264	207	207	336	336	200	200	288	288	302	302
1271	1271_4	HOR791	Hordeum vulgare L. convar. distichon (L.) Alef. var. nudum (L.) Alef.	2	n		Ethiopia	351	351	195	195	200	200	177	177	174	174	202	202	264	264	244	244	264	264	214	214	224	224	286	286	276	276	280	280	216	216	267	267	210	210	345	345	200	200	296	296	302	302
1272	1272_1	HOR1457	Hordeum vulgare L. convar. distichon (L.) Alef. var. dupliatrum Körn.	2	n		Ethiopia	351	351	195	195	200	200	174	174	174	174	202	202	264	264	246	246	264	264	214	214	224	224	290	290	282	282	276	276	216	216	267	267	210	210	-99999	-99999	200	200	296	296	302	302
1273	1273_2	HOR1502	Hordeum vulgare L. convar. distichon (L.) Alef. var. neogenes Körn.	2	n		Ethiopia	351	351	192	192	202	202	177	177	174	174	230	230	264	264	246	246	266	266	214	214	224	224	286	286	276	276	276	276	216	216	267	267	210	210	336	336	200	200	296	296	302	302
1274	1274_2	HOR1726	Hordeum vulgare L. convar. distichon (L.) Alef. var. neogenes Körn.	2	n		Ethiopia	351	351	192	192	190	190	177	177	174	174	230	230	264	264	246	246	266	266	214	214	224	224	286	286	276	276	276	276	216	216	267	267	210	210	336	336	200	208	296	296	302	302
1275	1275_2	HOR1729	Hordeum vulgare L. convar. distichon (L.) Alef. var. nudum (L.) Alef.	2	n		Ethiopia	351	351	195	195	200	200	174	174	174	174	202	202	264	264	246	246	264	264	214	214	224	224	286	286	282	282	280	280	213	213	267	267	204	204	345	345	200	200	296	296	302	302
1276	1276_3	HOR2546	Hordeum vulgare L. convar. distichon (L.) Alef. var. neogenes Körn.	2	n		Ethiopia	351	351	195	195	200	200	177	177	174	174	202	202	264	264	244	244	264	264	214	214	224	224	286	286	276	276	280	280	213	213	267	267	210	210	345	345	200	200	296	296	302	302
1277	1277_3	HOR2547	Hordeum vulgare L. convar. distichon (L.) Alef. var. viride (Vavilov & Orlov) Mansf.	2	n		Ethiopia	351	351	195	195	200	200	174	174	174	174	202	202	264	264	246	246	266	266	214	214	224	224	286	286	276	276	276	276	216	216	267	267	210	210	351	351	200	200	296	296	302	302
1278	1278_2	HOR2551	Hordeum vulgare L. convar. distichon (L.) Alef. var. nigrinudum (Vavilov) Mansf.	2	n		Ethiopia	351	351	195	195	200	200	171	171	174	174	230	230	264	264	246	246	264	264	214	214	224	224	286	286	282	282	276	276	216	216	267	267	210	210	-99999	-99999	200	200	296	296	302	302
1279	1279_1	HOR2566	Hordeum vulgare L. convar. distichon (L.) Alef. var. nudum (L.) Alef.	2	n		Ethiopia	351	351	195	195	200	200	174	174	174	174	230	230	264	264	246	246	264	264	214	214	224	224	286	286	276	276	276	276	216	216	267	267	210	210	336	336	200	200	296	296	302	302
1280	1280_2	HOR2720	Hordeum vulgare L. convar. distichon (L.) Alef. var. viride (Vavilov & Orlov) Mansf.	2	n		Ethiopia	351	351	195	195	194	194	174	174	174	174	202	202	264	264	246	246	264	264	214	214	224	224	290	290	282	282	280	280	216	216	267	267	210	210	345	345	200	200	296	296	302	302
1281	1281_1	HOR3288	Hordeum vulgare L. convar. distichon (L.) Alef. var. nudum (L.) Alef.	2	n		Ethiopia	351	351	195	195	204	204	177	177	174	174	202	202	264	264	244	244	266	266	214	214	224	224	290	290	282	282	276	276	216	216	267	267	210	210	336	336	200	200	296	296	302	302
1282	1282_1	HOR3290	Hordeum vulgare L. convar. distichon (L.) Alef. var. viride (Vavilov & Orlov) Mansf.	2	n		Ethiopia	351	351	195	195	200	200	174	174	174	174	202	202	264	264	246	246	266	266	214	214	224	224	286	286	282	282	280	280	216	216	267	267	210	210	345	345	200	200	296	296	302	302
1283	1283_1	HOR3291	Hordeum vulgare L. convar. distichon (L.) Alef. var. viride (Vavilov & Orlov) Mansf.	2	n		Ethiopia	351	351	195	195	200	200	174	174	174	174	202	202	264	264	246	246	266	266	214	214	224	224	286	286	282	282	280	280	216	216	267	267	210	210	336	336	200	200	296	296	302	302
1284	1284_1	HOR3292	Hordeum vulgare L. convar. distichon (L.) Alef. var. nudum (L.) Alef.	2	n		Ethiopia	336	351	195	195	202	202	177	177	174	174	202	202	264	264	244	244	266	266	214	214	224	224	290	290	282	282	276	276	216	216	267	267	210	210	336	336	200	200	296	296	302	302
1285	1285_1	HOR3293	Hordeum vulgare L. convar. distichon (L.) Alef. var. nigrinudum (Vavilov) Mansf.	2	n		Ethiopia	351	351	195	195	190	190	177	177	174	174	202	202	264	264	248	248	266	266	214	214	224	224	286	286	282	282	276	276	216	216	267	267	210	210	336	336	200	200	296	296	302	302
1286	1286_1	HOR3294	Hordeum vulgare L. convar. distichon (L.) Alef. var. viride (Vavilov & Orlov) Mansf.	2	n		Ethiopia	351	351	195	195	200	200	177	177	174	174	202	202	264	264	246	246	266	266	214	214	224	224	290	290	282	282	276	276	216	216	267	267	210	210	336	336	200	200	296	296	302	302
1287	1287_2	HOR3536	Hordeum vulgare L. convar. distichon (L.) Alef.s.l. var. brunneinudum (Vavilov & Orlov) Mansf.	2	n		Ethiopia	351	351	195	195	200	200	177	177	174	174	202	202	264	264	246	246	266	266	214	214	224	224	286	286	282	282	276	276	216	216	267	267	210	210	345	345	200	200	296	296	302	302
1288	1288_1	HOR3537	Hordeum vulgare L. convar. distichon (L.) Alef. var. dupliatrum Körn.	2	n		Ethiopia	351	351	195	195	200	200	174	174	174	174	202	202	264	264	246	246	264	264	214	214	224	224	290	290	282	282	276	276	216	216	267	267	210	210	336	336	200	200	296	296	302	302
1289	1289_1	HOR3591	Hordeum vulgare L. convar. distichon (L.) Alef. var. nudum (L.) Alef.	2	n		Ethiopia	351	351	195	195	190	190	177	177	174	174	202	202	264	264	244	244	266	266	214	214	224	224	290	290	284	284	276	276	213	213	267	267	210	210	345	345	200	200	296	296	302	302
1290	1290_2	HOR3592	Hordeum vulgare L. convar. distichon (L.) Alef. var. viride (Vavilov & Orlov) Mansf.	2	n		Ethiopia	351	351	195	195	200	200	168	168	174	174	194	202	264	264	246	246	266	266	214	214	228	228	286	286	282	282	282	282	216	216	267	267	210	210	345	345	200	200	296	296	302	302
1291	1291_4	HOR3593	Hordeum vulgare L. convar. distichon (L.) Alef. var. viride (Vavilov & Orlov) Mansf.	2	n		Ethiopia	351	351	195	195	200	200	174	174	174	174	202	202	264	264	246	246	266	266	214	214	228	228	290	290	282	282	282	282	216	216	267	267	210	210	336	336	200	200	296	296	302	302
1292	1292_3	HOR3594	Hordeum vulgare L. convar. distichon (L.) Alef. var. viride (Vavilov & Orlov) Mansf.	2	n		Ethiopia	351	351	195	195	200	200	177	177	174	174	202	202	264	264	246	246	266	266	214	214	224	224	290	290	284	284	280	280	216	216	267	267	210	210	345	345	200	200	296	296	302	302
1293	1293_1	HOR3595	Hordeum vulgare L. convar. distichon (L.) Alef. var. viride (Vavilov & Orlov) Mansf.	2	n		Ethiopia	351	351	195	195	200	200	162	162	174	174	202	202	264	264	246	246	266	266	214	214	224	224	286	286	282	282	280	280	216	216	267	267	210	210	345	345	200	200	296	296	302	302
1294	1294_2	HOR3596	Hordeum vulgare L. convar. distichon (L.) Alef. var. viride (Vavilov & Orlov) Mansf.	2	n		Ethiopia	351	351	195	195	200	200	174	174	174	174	202	202	264	264	246	246	266	266	214	214	224	224	286	286	284	284	280	280	216	216	267	267	210	210	345	345	200	200	296	296	302	302
1295	1295_1	HOR3597	Hordeum vulgare L. convar. distichon (L.) Alef. var. viride (Vavilov & Orlov) Mansf.	2	n		Ethiopia	351	351	195	195	200	200	174	174	174	174	202	202	-99999	-99999	246	246	266	266	214	214	224	224	290	290	284	284	280	280	216	216	267	267	210	210	345	345	200	200	296	296	302	302
1296	1296_1	HOR3598	Hordeum vulgare L. convar. distichon (L.) Alef. var. nigrinudum (Vavilov) Mansf.	2	n		Ethiopia	351	351	195	195	200	200	174	174	174	174	202	202	264	264	246	246	266	266	-99999	-99999	224	224	290	290	284	284	280	280	216	216	267	267	210	210	345	345	200	200	296	296	302	302
1297	1297_3	HOR3599	Hordeum vulgare L. convar. distichon (L.) Alef. var. nigrinudum (Vavilov) Mansf.	2	n		Ethiopia	351	351	195	195	200	200	177	177	174	174	202	202	264	264	246	246	266	266	214	214	224	224	286	286	282	282	276	276	216	216	267	267	210	210	336	336	200	200	296	296	302	302
1298	1298_2	HOR3600	Hordeum vulgare L. convar. distichon (L.) Alef. var. nigrinudum (Vavilov) Mansf.	2	n		Ethiopia	351	327	195	195	200	200	177	177	174	174	194	202	264	264	244	244	266	266	214	214	224	224	290	290	282	282	280	280	216	216	267	267	210	210	345	345	200	200	296	296	302	302
1299	1299_1	HOR3601	Hordeum vulgare L. convar. distichon (L.) Alef. var. nigrinudum (Vavilov) Mansf.	2	n		Ethiopia	351	351	195	195	200	200	177	177	174	174	190	202	264	264	246	246	266	266	214	214	224	224	290	290	284	284	276	276	216	216	267	267	210	210	336	336	200	200	296	296	302	302
1300	1300_1	HOR3602	Hordeum vulgare L. convar. distichon (L.) Alef. var. nigrinudum (Vavilov) Mansf.	2	n		Ethiopia	351	351	195	195	202	202	177	177	174	174	202	202	264	264	246	246	264	264	214	214	224	224	286	286	282	282	276	276	216	216	267	267	210	210	336	336	200	200	296	296	302	302
1301	1301_2	HOR3861	Hordeum vulgare L. convar. distichon (L.) Alef. var. nudum (L.) Alef.	2	n		Ethiopia	351	351	195	195	200	200	177	177	174	174	202	202	264	264	246	246	266	266	214	214	224	224	286	286	282	282	276	276	216	216	267	267	210	210	336	336	200	200	296	296	302	302
1302	1302_4	HOR3862	Hordeum vulgare L. convar. distichon (L.) Alef. var. nudum (L.) Alef.	2	n		Ethiopia	351	351	195	195	200	200	177	177	174	174	202	202	264	264	244	244	266	266	214	214	224	224	290	290	282	282	280	280	216	216	267	267	210	210	336	336	200	200	296	296	302	302
1303	1303_2	HOR4256	Hordeum vulgare L. convar. distichon (L.) Alef. var. nigrinudum (Vavilov) Mansf.	2	n		Ethiopia	351	351	195	195	202	202	177	177	174	174	202	202	264	264	244	244	266	266	214	214	224	224	290	290	282	282	276	276	216	216	267	267	210	210	-99999	-99999	200	200	296	296	302	302
1304	1304_1	HOR4288	Hordeum vulgare L. convar. distichon (L.) Alef. var. viride (Vavilov & Orlov) Mansf.	2	n		Ethiopia	351	351	195	195	200	200	177	177	174	174	202	202	264	264	246	246	266	266	214	214	224	224	286	286	282	282	276	276	216	216	267	267	210	210	345	345	200	200	296	296	302	302
1305	1305_4	HOR4450	Hordeum vulgare L. convar. distichon (L.) Alef. var. nudum (L.) Alef.	2	n		Ethiopia	351	351	195	195	200	200	174	174	174	174	202	202	267	267	246	246	266	266	214	214	228	228	286	286	282	282	280	280	216	216	258	258	210	210	351	351	200	200	296	296	302	302
1306	1306_3	HOR4452	Hordeum vulgare L. convar. distichon (L.) Alef. var. viride (Vavilov & Orlov) Mansf.	2	n		Ethiopia	351	351	195	195	200	200	174	174	174	174	202	202	264	264	246	246	266	266	214	214	228	228	286	286	282	282	280	280	216	216	267	267	210	210	351	351	208	208	296	296	304	304
1307	1307_2	HOR4453	Hordeum vulgare L. convar. distichon (L.) Alef. var. nudum (L.) Alef.	2	n		Ethiopia	351	351	195	195	200	200	174	174	174	174	202	202	264	264	246	246	266	266	214	214	228	228	286	286	282	282	280	280	216	216	267	267	210	210	351	351	208	208	296	296	302	302
1308	1308_2	HOR4805	Hordeum vulgare L. convar. distichon (L.) Alef. var. neogenes Körn.	2	n		Ethiopia	351	351	195	195	200	200	174	174	174	174	202	202	264	264	246	246	266	266	214	214	224	224	286	286	276	276	276	276	216	216	267	267	210	210	336	336	200	200	296	296	302	302
1309	1309_3	HOR5003	Hordeum vulgare L. convar. distichon (L.) Alef. var. neogenes Körn.	2	n		Ethiopia	351	351	195	195	200	200	177	177	174	174	202	202	264	264	244	244	264	264	214	214	224	224	286	286	276	276	280	280	216	216	267	267	210	210	345	345	200	200	296	296	302	302
1310	1310_1	HOR5199	Hordeum vulgare L. convar. distichon (L.) Alef. var. neogenes Körn.	2	n		Ethiopia	351	351	195	195	200	200	174	174	174	174	198	198	264	264	246	246	266	266	214	214	224	224	286	286	276	276	276	276	216	216	267	267	210	210	336	336	200	200	296	296	302	302
1311	1311_2	HOR5363	Hordeum vulgare L. convar. distichon (L.) Alef. var. neogenes Körn.	2	n		Ethiopia	351	351	195	195	200	200	174	174	174	174	202	202	264	264	246	246	266	266	214	214	224	224	286	286	276	276	276	276	216	216	267	267	210	210	-99999	-99999	200	200	296	296	302	302
1312	1312_1	HOR5417	Hordeum vulgare L. convar. distichon (L.) Alef. var. nudum (L.) Alef.	2	n		Ethiopia	351	351	195	195	200	200	177	177	174	174	202	202	264	264	244	244	266	266	214	214	224	224	290	290	282	282	276	276	213	213	267	267	210	210	-99999	-99999	200	200	296	296	302	302
1314	1314_2	HOR5595	Hordeum vulgare L. convar. distichon (L.) Alef. var. griseinudum (Vavilov & Orlov) Mansf.	2	n		Ethiopia	351	351	195	195	200	200	177	177	174	174	202	202	264	264	246	246	266	266	214	214	224	224	286	286	282	282	276	276	216	216	267	267	210	210	336	336	200	200	296	296	302	302
1315	1315_2	HOR5689	Hordeum vulgare L. convar. distichon (L.) Alef. var. nudum (L.) Alef.	2	n		Ethiopia	351	351	195	195	200	200	177	177	174	174	202	202	264	264	244	244	266	266	214	214	224	224	290	290	282	282	276	276	213	213	267	267	210	210	336	336	200	200	296	296	302	302
1316	1316_1	HOR5691	Hordeum vulgare L. convar. distichon (L.) Alef. var. nudum (L.) Alef.	2	n		Ethiopia	351	351	195	195	202	202	177	177	174	174	202	202	264	264	244	244	266	266	214	214	224	224	290	290	282	282	276	276	216	216	267	267	210	210	336	336	200	200	296	296	302	302
1317	1317_2	HOR5695	Hordeum vulgare L. convar. distichon (L.) Alef. var. nudum (L.) Alef.	2	n		Ethiopia	351	351	195	195	202	202	177	177	174	174	202	202	264	264	244	244	266	266	214	214	224	224	290	290	282	282	276	276	216	216	267	267	210	210	336	336	200	200	296	296	302	302
1318	1318_1	HOR5699	Hordeum vulgare L. convar. distichon (L.) Alef. var. nigrinudum (Vavilov) Mansf.	2	n		Ethiopia	351	351	195	195	200	200	174	174	174	174	202	202	264	264	246	246	256	262	214	214	224	224	286	286	282	282	276	276	213	213	267	267	210	210	336	336	200	200	296	296	302	302
1319	1319_3	HOR5700	Hordeum vulgare L. convar. distichon (L.) Alef. var. nigrinudum (Vavilov) Mansf.	2	n		Ethiopia	351	351	195	195	200	200	174	174	174	174	202	202	264	264	246	246	264	264	214	214	224	224	286	286	282	282	276	276	213	213	267	267	210	210	336	336	200	200	296	296	302	302
1320	1320_1	HOR5702	Hordeum vulgare L. convar. distichon (L.) Alef. var. neogenes Körn.	2	n		Ethiopia	351	351	195	195	200	200	174	174	174	174	230	230	264	264	246	246	264	264	214	214	224	224	286	286	282	282	276	276	213	213	267	267	204	204	-99999	-99999	200	200	296	296	302	302
1321	1321_3	HOR5712	Hordeum vulgare L. convar. distichon (L.) Alef. var. viride (Vavilov & Orlov) Mansf.	2	n		Ethiopia	351	351	195	195	200	200	177	177	174	174	202	202	264	264	246	246	266	266	214	214	224	224	286	286	282	282	280	280	216	216	267	267	210	210	345	345	200	200	296	296	302	302
1322	1322_2	HOR5717	Hordeum vulgare L. convar. distichon (L.) Alef. var. neogenes Körn.	2	n		Ethiopia	351	351	192	192	202	202	177	177	174	174	230	230	264	264	246	246	266	266	214	214	224	224	286	286	276	276	276	276	216	216	267	267	210	210	336	336	200	200	296	296	302	302
1323	1323_2	HOR5719	Hordeum vulgare L. convar. distichon (L.) Alef. var. nudum (L.) Alef.	2	n		Ethiopia	351	351	195	195	200	200	177	177	174	174	230	230	264	264	246	246	266	266	212	212	224	224	286	286	276	276	276	276	216	216	267	267	210	210	-99999	-99999	200	200	296	296	302	302
1324	1324_2	HOR5826	Hordeum vulgare L. convar. distichon (L.) Alef. var. nudifurcatum (Regel) Mansf.	2	n		Ethiopia	261	261	192	192	200	200	168	177	174	174	254	254	267	267	246	246	256	256	212	212	224	224	286	286	274	274	276	276	213	213	267	267	210	210	351	351	196	208	292	292	294	294
1325	1325_4	HOR5827	Hordeum vulgare L. convar. distichon (L.) Alef. var. nudum (L.) Alef.	2	n		Ethiopia	261	261	192	192	202	202	177	177	174	174	254	254	264	264	246	246	256	256	212	212	224	224	286	286	274	274	276	276	216	216	267	267	210	210	345	345	200	200	292	292	302	302
1326	1326_1	HOR5892	Hordeum vulgare L. convar. distichon (L.) Alef. var. viride (Vavilov & Orlov) Mansf.	2	n		Ethiopia	351	351	195	195	200	200	177	177	174	174	230	230	264	264	246	246	266	266	214	214	224	224	286	286	276	276	276	276	213	213	267	267	210	210	336	336	200	200	296	296	302	302
1327	1327_2	HOR5915	Hordeum vulgare L. convar. distichon (L.) Alef. var. nudum (L.) Alef.	2	n		Ethiopia	336	336	195	195	218	218	177	177	168	174	254	254	267	267	244	244	256	256	214	214	228	228	290	290	274	274	276	276	213	213	264	264	210	210	345	345	200	200	288	288	302	302
1328	1328_1	HOR5917	Hordeum vulgare L. convar. distichon (L.) Alef. var. nudum (L.) Alef.	2	n		Ethiopia	351	351	195	195	200	200	174	174	174	174	230	230	264	264	246	246	262	262	214	214	224	224	286	286	276	276	276	276	216	216	267	267	210	210	-99999	-99999	200	200	296	296	302	302
1329	1329_3	HOR5918	Hordeum vulgare L. convar. distichon (L.) Alef. var. neogenes Körn.	2	n		Ethiopia	351	351	195	195	200	200	177	177	174	174	190	190	264	264	244	244	264	264	214	214	224	224	286	286	276	276	280	280	213	213	267	267	210	210	345	345	200	200	296	296	302	302
1331	1331_2	HOR5921	Hordeum vulgare L. convar. distichon (L.) Alef. var. nigrinudum (Vavilov) Mansf.	2	n		Ethiopia	351	351	195	195	200	200	174	174	174	174	230	230	264	264	246	246	264	264	214	214	224	224	286	286	282	282	276	276	216	216	267	267	210	210	-99999	-99999	200	200	296	296	302	302
1332	1332_1	HOR5922	Hordeum vulgare L. convar. distichon (L.) Alef. var. nigrinudum (Vavilov) Mansf.	2	n		Ethiopia	351	351	195	195	202	202	174	174	174	174	230	230	264	264	244	244	264	264	214	214	224	224	290	290	282	282	276	276	219	219	258	258	210	210	336	336	196	204	296	296	302	302
1333	1333_2	HOR5923	Hordeum vulgare L. convar. distichon (L.) Alef. var. griseinudum (Vavilov & Orlov) Mansf.	2	n		Ethiopia	351	351	195	195	200	200	177	177	174	174	202	202	264	264	246	246	264	264	214	214	224	224	286	286	282	282	276	276	216	216	267	267	210	210	339	345	200	200	296	296	302	302
1334	1334_4	HOR5924	Hordeum vulgare L. convar. distichon (L.) Alef. var. nigrinudum (Vavilov) Mansf.	2	n		Ethiopia	351	351	195	195	202	202	162	162	174	174	230	230	264	264	246	246	264	264	214	214	224	224	286	286	282	282	276	276	216	216	267	267	204	204	345	345	200	200	296	296	302	302
1335	1335_4	HOR5928	Hordeum vulgare L. convar. distichon (L.) Alef. var. duplialbum Körn.	2	n		Ethiopia	351	327	195	195	196	196	171	171	165	174	202	202	264	264	246	246	264	264	214	214	224	224	290	290	282	282	276	276	216	216	267	267	210	210	336	336	200	200	296	296	302	302
1336	1336_3	HOR5929	Hordeum vulgare L. convar. distichon (L.) Alef. var. duplialbum Körn.	2	n		Ethiopia	351	351	195	195	196	196	174	174	174	174	202	202	264	264	246	246	264	264	214	214	224	224	290	290	282	282	276	276	216	216	267	267	210	210	336	336	200	200	296	296	302	302
1337	1337_3	HOR5963	Hordeum vulgare L. convar. distichon (L.) Alef. var. duplialbum Körn.	2	n		Ethiopia	351	351	195	195	196	196	174	174	174	174	202	202	264	264	246	246	264	264	214	214	224	224	290	290	282	282	276	276	216	216	267	267	210	210	336	336	200	200	296	296	302	302
1338	1338_1	HOR5964	Hordeum vulgare L. convar. distichon (L.) Alef. var. duplialbum Körn.	2	n		Ethiopia	351	351	195	195	200	200	174	174	174	174	230	230	267	267	246	246	-99999	-99999	214	214	224	224	286	286	276	276	276	276	216	216	267	267	-99999	-99999	336	336	200	200	296	296	-99999	-99999
1339	1339_3	HOR5965	Hordeum vulgare L. convar. distichon (L.) Alef. var. nudum (L.) Alef.	2	n		Ethiopia	351	351	195	195	200	200	174	174	174	174	230	230	267	267	246	246	264	264	214	214	224	224	286	286	276	276	276	276	216	216	267	267	210	210	336	336	200	200	296	296	302	302
1341	1341_3	HOR6209	Hordeum vulgare L. convar. distichon (L.) Alef. var. nudum (L.) Alef.	2	n		Ethiopia	351	351	195	195	200	200	177	177	174	174	230	230	264	264	244	244	264	264	214	214	224	224	286	286	276	276	280	280	213	213	267	267	210	210	339	345	200	200	296	296	302	302
1342	1342_2	HOR6443	Hordeum vulgare L. convar. distichon (L.) Alef. var. nudum (L.) Alef.	2	n		Ethiopia	351	351	195	195	200	200	174	174	174	174	218	230	264	264	246	246	264	264	214	214	224	224	286	286	276	276	276	276	216	216	267	267	210	210	336	336	200	200	296	296	302	302
1343	1343_3	HOR6463	Hordeum vulgare L. convar. distichon (L.) Alef. var. nudum (L.) Alef.	2	n		Ethiopia	351	351	195	195	200	200	177	177	174	174	202	202	264	264	244	244	264	264	214	214	224	224	290	290	282	282	276	276	216	216	267	267	210	210	336	336	200	200	296	296	302	302
1344	1344_1	HOR6478	Hordeum vulgare L. convar. distichon (L.) Alef. var. nudum (L.) Alef.	2	n		Ethiopia	351	351	195	195	200	200	174	174	174	174	202	202	264	264	246	246	264	264	214	214	224	224	286	286	282	282	280	280	213	213	267	267	201	201	-99999	-99999	200	200	296	296	302	302
1345	1345_4	HOR6765	Hordeum vulgare L. convar. distichon (L.) Alef. var. nudum (L.) Alef.	2	n		Ethiopia	351	351	195	195	202	202	177	177	174	174	202	202	264	264	244	244	264	264	214	214	224	224	290	290	282	282	276	276	216	216	267	267	210	210	336	336	200	200	296	296	302	302
1347	1347_1	HOR6767	Hordeum vulgare L. convar. distichon (L.) Alef. var. griseinudum (Vavilov & Orlov) Mansf.	2	n		Ethiopia	351	351	195	195	200	200	177	177	174	174	202	202	264	264	246	246	252	266	214	214	224	224	286	286	282	282	276	276	216	216	267	267	210	210	336	336	200	200	296	296	302	302
1348	1348_3	HOR6769	Hordeum vulgare L. convar. distichon (L.) Alef. var. nudum (L.) Alef.	2	n		Ethiopia	351	351	195	195	200	200	174	174	174	174	194	194	264	264	246	246	266	266	214	214	224	224	286	286	282	282	280	280	216	216	267	267	210	210	345	345	200	200	296	296	302	302
1349	1349_2	HOR6888	Hordeum vulgare L. convar. distichon (L.) Alef. var. nudum (L.) Alef.	2	n		Ethiopia	351	351	195	195	200	200	174	174	174	174	230	230	264	264	-99999	-99999	266	266	214	214	224	224	286	286	276	276	280	280	216	216	267	267	210	210	345	345	200	200	296	296	302	302
1350	1350_1	HOR6891	Hordeum vulgare L. convar. distichon (L.) Alef. var. viride (Vavilov & Orlov) Mansf.	2	n		Ethiopia	351	351	195	195	200	200	174	174	174	174	202	202	264	264	246	246	266	266	214	214	224	224	286	286	276	276	276	276	213	213	264	264	210	210	351	351	200	200	296	296	302	302
1351	1351_2	HOR6892	Hordeum vulgare L. convar. distichon (L.) Alef. var. viride (Vavilov & Orlov) Mansf.	2	n		Ethiopia	351	351	195	195	200	200	174	174	174	174	202	202	264	264	246	246	-99999	-99999	214	214	224	224	286	286	276	276	276	276	213	213	267	267	-99999	-99999	351	351	200	200	296	296	-99999	-99999
1352	1352_2	HOR6899	Hordeum vulgare L. convar. distichon (L.) Alef. var. neogenes Körn.	2	n		Ethiopia	351	351	192	192	202	202	177	177	174	174	230	230	264	264	246	246	266	266	214	214	224	224	286	286	276	276	276	276	216	216	267	267	210	210	336	336	200	200	296	296	302	302
1353	1353_2	HOR6900	Hordeum vulgare L. convar. distichon (L.) Alef. var. neogenes Körn.	2	n		Ethiopia	351	351	192	192	202	202	177	177	174	174	230	230	264	264	246	246	266	266	214	214	224	224	286	286	276	276	276	276	216	216	267	267	210	210	-99999	-99999	200	200	296	296	302	302
1354	1354_1	HOR6905	Hordeum vulgare L. convar. distichon (L.) Alef. var. nudum (L.) Alef.	2	n		Ethiopia	336	336	195	195	224	224	180	180	174	174	258	258	267	267	244	244	256	256	214	214	228	228	290	290	274	274	276	276	213	213	264	264	210	210	-99999	-99999	200	200	288	288	302	302
1355	1355_4	HOR6907	Hordeum vulgare L. convar. distichon (L.) Alef.s.l. var. brunneinudum (Vavilov & Orlov) Mansf.	2	n		Ethiopia	351	351	195	195	200	200	174	174	174	174	202	202	264	264	246	246	264	264	214	214	224	224	286	286	282	282	276	276	213	213	267	267	210	210	-99999	-99999	200	200	296	296	302	302
1356	1356_3	HOR6910	Hordeum vulgare L. convar. distichon (L.) Alef. var. griseinudum (Vavilov & Orlov) Mansf.	2	n		Ethiopia	351	351	195	195	202	202	177	177	174	174	202	202	267	267	246	246	254	254	214	214	228	228	286	286	282	282	280	280	216	216	258	258	210	210	351	351	200	200	296	296	304	304
1357	1357_2	HOR6911	Hordeum vulgare L. convar. distichon (L.) Alef.s.l. var. brunneinudum (Vavilov & Orlov) Mansf.	2	n		Ethiopia	351	351	195	195	200	200	174	174	174	174	230	230	264	264	246	246	-99999	-99999	214	214	224	224	286	286	282	282	276	276	213	213	267	267	-99999	-99999	336	336	200	200	296	296	-99999	-99999
1359	1359_2	HOR6966	Hordeum vulgare L. convar. distichon (L.) Alef. var. duplialbum Körn.	2	n		Ethiopia	351	351	195	195	196	196	174	174	174	174	202	202	264	264	246	246	264	264	214	214	224	224	290	290	282	282	276	276	216	216	267	267	210	210	336	336	200	200	296	296	302	302
1360	1360_1	HOR7317	Hordeum vulgare L. convar. distichon (L.) Alef. var. nigrinudum (Vavilov) Mansf.	2	n		Ethiopia	351	351	195	195	202	202	177	177	174	174	202	202	267	267	246	246	254	254	214	214	228	228	286	286	282	282	280	280	216	216	258	258	210	210	351	351	200	200	296	296	304	304
1361	1361_2	HOR7943	Hordeum vulgare L. convar. distichon (L.) Alef. var. nudum (L.) Alef.	2	n		Ethiopia	351	351	192	192	202	202	177	177	174	174	230	230	264	264	246	246	266	266	214	214	224	224	286	286	276	276	276	276	216	216	267	267	210	210	-99999	-99999	200	200	296	296	302	302
1362	1362_1	HOR7945	Hordeum vulgare L. convar. distichon (L.) Alef. var. nudum (L.) Alef.	2	n		Ethiopia	351	351	195	195	202	202	177	177	174	174	202	202	264	264	244	244	264	264	214	214	224	224	290	290	282	282	276	276	216	216	267	267	210	210	336	336	200	200	296	296	302	302
1363	1363_3	HOR9075	Hordeum vulgare L. convar. distichon (L.) Alef. var. nudum (L.) Alef.	2	n		Ethiopia	351	351	195	195	200	200	177	177	174	174	202	202	264	264	246	246	266	266	214	214	224	224	286	286	276	276	276	276	213	213	267	267	210	210	336	336	200	200	296	296	302	302
1364	1364_4	HOR11427	Hordeum vulgare L. convar. distichon (L.) Alef. var. nudum (L.) Alef.	2	n		Ethiopia	351	351	195	195	200	200	174	174	-99999	-99999	202	202	264	264	246	246	264	264	214	214	224	224	286	286	282	282	280	280	213	213	267	267	204	204	345	345	200	200	296	296	302	302
1365	1365_4	HOR11435	Hordeum vulgare L. convar. distichon (L.) Alef. var. nudum (L.) Alef.	2	n		Ethiopia	351	351	195	195	202	202	183	183	174	174	-99999	-99999	267	267	246	246	254	254	214	214	228	228	290	290	282	282	280	280	216	216	258	258	210	210	351	351	208	208	296	296	304	304
1366	1366_1	HOR11466	Hordeum vulgare L. convar. distichon (L.) Alef. var. neogenes Körn.	2	n		Ethiopia	351	351	195	195	200	200	174	174	-99999	-99999	-99999	-99999	264	264	246	246	266	266	214	214	224	224	286	286	276	276	276	276	216	216	267	267	210	210	-99999	-99999	200	200	296	296	302	302
1367	1367_2	HOR13833	Hordeum vulgare L. convar. distichon (L.) Alef. var. nudum (L.) Alef.	2	n		Ethiopia	351	351	-99999	-99999	200	200	177	177	174	174	202	202	264	264	244	244	266	266	214	214	224	224	290	290	276	276	-99999	-99999	213	213	267	267	210	210	-99999	-99999	200	200	296	296	302	302
1368	1368_2	HOR13866	Hordeum vulgare L. convar. distichon (L.) Alef. var. gymnocrithum Körn.	2	n		Ethiopia	351	351	195	195	200	200	177	177	174	174	202	202	264	264	244	244	264	264	214	214	224	224	286	286	276	276	280	280	213	213	267	267	210	210	322	322	200	200	296	296	302	302
1369	1369_4	HOR14028	Hordeum vulgare L. convar. distichon (L.) Alef. var. nigrinudum (Vavilov) Mansf.	2	n		Ethiopia	351	351	195	195	200	200	174	174	174	174	230	230	264	264	246	246	264	264	214	214	224	224	286	286	282	282	276	276	216	216	267	267	210	210	-99999	-99999	200	200	296	296	302	302
1370	1370_2	HOR14033	Hordeum vulgare L. convar. distichon (L.) Alef.s.l. var. brunneinudum (Vavilov & Orlov) Mansf.	2	n		Ethiopia	351	351	195	195	200	200	174	174	174	174	230	230	264	264	246	246	264	264	214	214	224	224	286	286	276	276	276	276	216	216	267	267	210	210	336	336	200	200	296	296	302	302
1371	1371_2	HOR337	Hordeum vulgare L. convar. distichon (L.) Alef. var. nudum (L.) Alef.	2	n		Germany	351	351	195	195	202	202	177	177	174	174	270	270	264	264	244	244	254	254	214	214	228	228	286	286	282	282	280	280	216	216	258	258	210	210	351	351	204	204	296	296	304	304
1373	1373_3	HOR14354	Hordeum vulgare L. convar. distichon (L.) Alef. var. nudum (L.) Alef.	2	n		Germany	336	336	195	195	218	218	177	177	174	174	258	258	267	267	244	244	256	256	214	214	228	228	290	290	274	274	276	276	213	213	264	264	210	210	351	351	200	200	288	288	302	302
1374	1374_3	HOR2774	Hordeum vulgare L. convar. distichon (L.) Alef. var. nudum (L.) Alef.	2	n		Iran	336	336	195	195	216	216	177	177	174	174	258	258	267	267	244	244	254	254	212	212	224	224	290	290	274	274	276	276	213	213	264	264	210	210	351	351	200	200	296	296	302	302
1375	1375_2	HOR2775	Hordeum vulgare L. convar. distichon (L.) Alef. var. nudum (L.) Alef.	2	n		Iran	336	336	195	195	218	218	177	177	174	174	258	258	267	267	244	244	254	254	212	212	224	224	290	290	-99999	-99999	276	276	213	213	264	264	210	210	351	351	200	200	296	296	302	302
1376	1376_1	HOR2776	Hordeum vulgare L. convar. distichon (L.) Alef. var. nudum (L.) Alef.	2	n		Iran	336	336	195	195	218	218	177	177	174	174	258	258	267	267	244	244	254	254	212	212	224	224	290	290	274	274	276	276	213	213	264	264	210	210	351	351	200	200	296	296	302	302
1377	1377_4	HOR2777	Hordeum vulgare L. convar. distichon (L.) Alef. var. nudum (L.) Alef.	2	n		Iran	336	336	195	195	218	218	177	177	174	174	258	258	267	267	244	244	254	254	212	212	224	224	290	290	274	274	276	276	213	213	264	264	210	210	351	351	200	200	296	296	302	302
1379	1379_3	HOR2779	Hordeum vulgare L. convar. distichon (L.) Alef. var. nudum (L.) Alef.	2	n		Iran	336	336	195	195	218	218	177	177	174	174	258	258	267	267	244	244	254	254	212	212	224	224	290	290	274	274	276	276	213	213	264	264	210	210	351	351	200	200	296	296	302	302
1380	1380_3	HOR2780	Hordeum vulgare L. convar. distichon (L.) Alef. var. nudum (L.) Alef.	2	n		Iran	336	336	195	195	218	218	177	177	174	174	258	258	267	267	244	244	254	254	212	212	224	224	290	290	274	274	276	276	213	213	264	264	210	210	351	351	200	200	296	296	302	302
1381	1381_3	HOR2781	Hordeum vulgare L. convar. distichon (L.) Alef. var. nudum (L.) Alef.	2	n		Iran	336	336	195	195	218	218	177	177	174	174	258	258	267	267	244	244	254	254	212	212	224	224	290	290	274	274	276	276	213	213	264	264	210	210	-99999	-99999	200	200	296	296	302	302
1382	1382_2	HOR2790	Hordeum vulgare L. convar. distichon (L.) Alef. var. nudum (L.) Alef.	2	n		Iran	336	336	195	195	218	218	177	177	174	174	258	258	267	267	244	244	254	254	212	212	224	224	290	290	274	274	276	276	213	213	264	264	210	210	351	351	200	200	296	296	302	302
1383	1383_2	HOR2791	Hordeum vulgare L. convar. distichon (L.) Alef. var. nudum (L.) Alef.	2	n		Iran	336	336	195	195	218	218	177	177	174	174	254	258	267	267	244	244	254	254	212	212	224	224	290	290	274	274	276	276	213	213	264	264	210	210	351	351	200	200	296	296	302	302
1384	1384_2	HOR10484	Hordeum vulgare L. convar. distichon (L.) Alef. var. nigrinudum (Vavilov) Mansf.	2	n		Iraq	351	351	195	195	200	200	174	174	174	174	230	230	264	264	246	246	264	264	214	214	224	224	286	286	282	282	276	276	216	216	267	267	210	210	-99999	-99999	200	200	296	296	302	302
1385	1385_3	HOR949	Hordeum vulgare L. convar. distichon (L.) Alef. var. nudum (L.) Alef.	2	n		Italy	351	351	195	195	202	202	183	183	174	174	230	230	264	264	244	244	254	254	214	214	224	224	290	290	276	276	280	280	216	216	258	258	210	210	351	351	200	200	296	296	302	302
1386	1386_2	BCC1496	Hordeum vulgare L. convar. distichon (L.) Alef. var. nudum (L.) Alef.	2	n		Kazakhstan	336	336	195	195	220	220	177	177	174	174	254	254	267	267	244	244	256	256	214	214	228	228	290	290	274	274	276	276	213	213	264	264	210	210	351	351	200	200	288	288	302	302
1387	1387_2	HOR7533	Hordeum vulgare L. convar. distichon (L.) Alef. var. nudum (L.) Alef.	2	n		Poland	261	261	195	195	196	196	177	177	174	174	258	258	264	264	246	246	256	256	214	214	224	224	290	290	278	278	276	276	216	216	264	264	207	207	351	351	200	200	288	288	302	302
1388	1388_3	HOR7535	Hordeum vulgare L. convar. distichon (L.) Alef. var. viride (Vavilov & Orlov) Mansf.	2	n		Poland	261	261	195	195	196	196	177	177	174	174	258	258	264	264	246	246	256	256	214	214	224	224	290	290	278	278	276	276	216	216	264	264	207	207	351	351	200	200	288	288	302	302
1389	1389_2	HOR8809	Hordeum vulgare L. convar. distichon (L.) Alef. var. viride (Vavilov & Orlov) Mansf.	2	n		Poland	-99999	-99999	195	195	196	196	177	177	174	174	258	258	267	267	244	244	262	262	214	214	224	224	290	290	274	274	276	276	213	213	264	264	207	207	351	351	200	200	288	288	302	302
1390	1390_1	HOR8810	Hordeum vulgare L. convar. distichon (L.) Alef. var. viride (Vavilov & Orlov) Mansf.	2	n		Poland	261	261	195	195	218	218	177	177	174	174	254	258	267	267	244	244	264	264	214	214	224	224	290	290	274	274	276	276	213	213	264	264	207	207	336	336	200	200	288	288	302	302
1391	1391_2	HOR8813	Hordeum vulgare L. convar. distichon (L.) Alef.s.l. var. brunneinudum (Vavilov & Orlov) Mansf.	2	n		Poland	261	261	195	195	196	196	168	168	174	174	246	246	264	264	246	246	256	256	214	214	224	224	290	290	-99999	-99999	278	278	207	207	264	264	207	207	351	351	200	200	288	288	302	302
1392	1392_1	HOR8815	Hordeum vulgare L. convar. distichon (L.) Alef. var. viride (Vavilov & Orlov) Mansf.	2	n		Poland	261	261	195	195	196	196	177	177	174	174	258	258	264	264	244	244	264	264	214	214	224	224	290	290	278	278	278	278	216	216	264	264	207	207	336	336	200	200	288	288	302	302
1393	1393_1	HOR8827	Hordeum vulgare L. convar. distichon (L.) Alef. var. viride (Vavilov & Orlov) Mansf.	2	n		Poland	261	261	195	195	196	196	177	177	174	174	258	258	267	267	244	244	264	264	214	214	224	224	290	290	274	274	278	278	213	213	264	264	207	207	351	351	200	200	288	288	302	302
1394	1394_2	HOR8829	Hordeum vulgare L. convar. distichon (L.) Alef. var. nudum (L.) Alef.	2	n		Poland	261	261	195	195	218	218	180	180	174	174	258	258	267	267	244	244	256	256	214	214	224	224	290	290	274	274	278	278	213	213	264	264	207	207	336	336	200	200	288	288	302	302
1395	1395_3	HOR8830	Hordeum vulgare L. convar. distichon (L.) Alef. var. nudum (L.) Alef.	2	n		Poland	261	261	195	195	218	218	177	177	174	174	258	258	267	267	244	244	256	256	214	214	224	224	290	290	278	278	278	278	213	213	264	264	210	210	351	351	200	200	288	288	302	302
1396	1396_1	HOR9277	Hordeum vulgare L. convar. distichon (L.) Alef. var. griseinudum (Vavilov & Orlov) Mansf.	2	n		Poland	261	261	195	195	196	196	177	177	174	174	258	258	264	264	246	246	256	256	214	214	224	224	290	290	278	278	278	278	216	216	264	264	207	207	351	351	200	200	288	288	302	302
1397	1397_3	HOR11459	Hordeum vulgare L. convar. distichon (L.) Alef. var. nudifurcatum (Regel) Mansf.	2	n		Romania	261	261	210	210	200	200	180	180	174	174	230	230	267	267	244	244	256	256	214	214	224	224	292	292	276	276	282	282	213	213	267	267	210	210	351	351	208	208	296	296	294	294
1398	1398_1	BCC1489	Hordeum vulgare L. convar. distichon (L.) Alef. var. nudum (L.) Alef.	2	n		Russia	336	336	195	195	218	218	177	177	174	174	254	254	267	267	244	244	256	256	214	214	228	228	290	290	274	274	278	278	213	213	264	264	210	210	351	351	200	200	288	288	302	302
1399	1399_1	HOR4461	Hordeum vulgare L. convar. distichon (L.) Alef. var. nudum (L.) Alef.	2	n		Russia	261	261	210	210	200	200	168	168	174	174	218	218	267	267	244	244	256	256	214	214	228	228	292	292	276	276	282	282	207	207	267	267	210	210	351	351	196	196	296	296	294	294
1400	1400_4	HOR4462	Hordeum vulgare L. convar. distichon (L.) Alef. var. nudum (L.) Alef.	2	n		Russia	336	336	195	195	218	218	177	177	174	174	258	258	267	267	244	244	256	256	214	214	228	228	290	290	274	274	278	278	213	213	264	264	210	210	351	351	200	200	288	288	302	302
1401	1401_3	HOR4463	Hordeum vulgare L. convar. distichon (L.) Alef. var. nudum (L.) Alef.	2	n		Russia	336	336	195	195	218	218	177	177	174	174	254	254	267	267	244	244	254	254	214	214	224	224	290	290	274	274	278	278	216	216	264	264	210	210	351	351	200	200	288	288	302	302
1403	1403_2	HOR4465	Hordeum vulgare L. convar. distichon (L.) Alef. var. viride (Vavilov & Orlov) Mansf.	2	n		Russia	336	336	-99999	-99999	220	220	-99999	-99999	174	174	254	254	264	264	244	244	254	254	214	214	224	224	-99999	-99999	274	274	-99999	-99999	213	213	-99999	-99999	210	210	345	345	200	200	-99999	-99999	300	300
1405	1405_1	HOR212	Hordeum vulgare L. convar. distichon (L.) Alef. var. nigrinudum (Vavilov) Mansf.	2	n		Russia	351	351	195	195	200	200	174	174	174	174	202	202	264	264	246	246	264	264	214	214	224	224	286	286	276	276	282	282	216	216	267	267	210	210	336	336	200	200	296	296	302	302
1406	1406_2	HOR1368	Hordeum vulgare L. convar. distichon (L.) Alef. var. viride (Vavilov & Orlov) Mansf.	2	n		Russia	351	351	195	195	194	194	177	177	174	174	254	254	267	267	244	244	256	256	214	214	228	228	290	290	274	274	278	278	213	213	264	264	207	207	336	336	200	200	288	288	304	304
1407	1407_2	HOR4459	Hordeum vulgare L. convar. distichon (L.) Alef. var. viride (Vavilov & Orlov) Mansf.	2	n		Turkey	336	336	195	195	218	218	177	177	174	174	258	258	267	267	244	244	254	254	212	212	224	224	290	290	274	274	278	278	213	213	264	264	210	210	351	351	200	200	296	296	302	302
1408	1408_1	HOR1459	Hordeum vulgare L. convar. vulgare var. asiaticum (Vavilov) Mansf.	6	n		Afghanistan	261	261	210	210	200	200	174	174	174	174	258	258	267	267	-99999	-99999	254	254	214	214	224	224	286	286	-99999	-99999	278	278	213	213	258	258	210	210	324	324	204	204	292	292	294	294
1409	1409_3	HOR1460	Hordeum vulgare L. convar. vulgare var. coeleste L.	6	n		Afghanistan	261	261	195	195	220	220	180	180	174	174	238	238	258	258	244	244	276	276	214	214	224	224	290	290	274	274	278	278	213	213	258	258	207	207	324	324	208	208	292	292	302	302
1410	1410_1	HOR1461	Hordeum vulgare L. convar. vulgare var. himalayense (Rittig) Körn.	6	n		Afghanistan	351	351	195	195	222	222	177	177	174	174	242	242	267	267	244	244	266	266	214	214	224	224	290	290	274	274	278	278	213	213	273	273	207	207	324	324	208	208	292	292	302	302
1411	1411_2	HOR1462	Hordeum vulgare L. convar. vulgare var. coeleste L.	6	n		Afghanistan	261	261	204	204	200	200	174	174	174	174	202	202	267	267	244	244	254	254	210	210	224	224	286	286	276	276	278	278	213	213	264	264	210	210	345	345	208	208	296	296	300	300
1412	1412_2	HOR1463	Hordeum vulgare L. convar. vulgare var. coeleste L.	6	n		Afghanistan	261	261	195	195	200	200	177	177	174	174	258	258	267	267	244	244	254	254	214	214	224	224	290	290	274	274	278	278	213	213	258	258	207	207	345	345	208	208	296	296	302	302
1413	1413_1	HOR1464	Hordeum vulgare L. convar. vulgare var. coeleste L.	6	n		Afghanistan	261	261	195	195	200	200	174	174	174	174	230	230	264	264	244	244	254	254	214	214	224	224	290	290	276	276	282	282	213	213	267	267	210	210	345	345	200	200	296	296	302	302
1414	1414_1	HOR1465	Hordeum vulgare L. convar. vulgare var. himalayense (Rittig) Körn.	6	n		Afghanistan	261	261	195	195	202	202	180	180	174	174	254	254	264	264	246	246	254	254	214	214	224	224	286	286	282	282	278	278	213	213	258	258	213	213	351	351	208	208	296	296	304	304
1415	1415_3	HOR1473	Hordeum vulgare L. convar. vulgare var. himalayense (Rittig) Körn.	6	n		Afghanistan	261	261	210	210	212	212	180	180	174	174	250	250	267	267	244	244	266	266	214	214	224	224	286	286	276	276	278	278	216	216	258	258	207	207	351	351	200	200	292	292	294	294
1417	1417_3	HOR7321	Hordeum vulgare L. convar. vulgare var. coeleste L.	6	n		Afghanistan	351	351	195	195	220	220	180	180	174	174	254	254	267	267	244	244	254	254	214	214	224	224	290	290	274	274	278	278	213	216	273	273	210	210	324	324	208	208	296	296	302	302
1419	1419_2	HOR8265	Hordeum vulgare L. convar. vulgare var. coeleste L.	6	n		Afghanistan	-99999	-99999	195	195	220	220	180	180	174	174	250	250	267	267	244	244	254	254	214	214	224	224	290	290	274	274	278	278	213	213	273	273	207	207	324	324	208	208	296	296	302	302
1420	1420_1	HOR827	Hordeum vulgare L. convar. vulgare var. coeleste L.	6	n		Austria	261	261	195	195	210	210	177	177	165	165	266	266	264	264	244	244	254	254	214	214	224	224	286	286	278	278	278	278	216	216	264	264	210	210	336	336	212	212	296	296	302	302
1421	1421_3	HOR2346	Hordeum vulgare L. convar. vulgare var. coeleste L.	6	n		Austria	261	261	195	195	200	200	177	177	165	165	270	270	264	264	244	244	254	254	214	214	224	224	286	286	278	278	278	278	216	216	264	264	210	210	336	336	212	212	296	296	302	302
1422	1422_3	HOR3964	Hordeum vulgare L. convar. vulgare var. coeleste L.	6	n		Austria	261	261	195	195	210	210	177	177	165	165	266	266	264	264	244	244	254	254	214	214	224	224	286	286	278	278	278	278	216	216	264	264	210	210	336	336	212	212	296	296	302	302
1423	1423_2	HOR3966	Hordeum vulgare L. convar. vulgare var. coeleste L.	6	n		Austria	261	261	195	195	210	210	177	177	165	165	266	266	264	264	244	244	254	254	214	214	224	224	286	286	278	278	278	278	216	216	264	264	210	210	336	336	212	212	296	296	302	302
1424	1424_1	HOR11470	Hordeum vulgare L. convar. vulgare var. coeleste L.	6	n		Austria	351	351	195	195	200	200	174	174	174	174	202	202	264	264	246	246	266	266	214	214	224	224	286	286	282	282	282	282	216	216	267	267	210	210	345	345	200	200	296	296	302	302
1425	1425_3	HOR44	Hordeum vulgare L. convar. vulgare var. coeleste L.	6	n		Bulgaria	261	261	195	195	210	210	177	177	165	165	266	266	264	264	244	244	254	254	214	214	224	224	286	286	278	278	278	278	216	216	264	264	210	210	336	336	212	212	296	296	302	302
1426	1426_3	HOR4946	Hordeum vulgare L. convar. vulgare var. coeleste L.	6	n		Czech	261	261	195	195	196	196	180	180	165	165	258	258	264	264	-99999	-99999	-99999	-99999	214	214	224	224	-99999	-99999	278	278	278	278	216	216	264	264	-99999	-99999	336	336	212	212	296	296	-99999	-99999
1427	1427_2	HOR7279	Hordeum vulgare L. convar. vulgare var. coeleste L.	6	n		Czech	261	261	195	195	196	196	180	180	165	165	258	258	264	264	244	244	262	262	214	214	224	224	286	286	274	274	278	278	216	216	264	264	207	207	336	336	212	212	288	288	302	302
1428	1428_2	HOR4813	Hordeum vulgare L. convar. vulgare var. violaceum Körn.	6	n		Denmark	261	261	210	210	200	200	171	180	174	174	238	238	267	267	244	244	258	258	214	214	224	224	286	286	274	274	278	278	213	213	258	258	207	207	351	351	200	204	296	296	294	294
1429	1429_2	HOR4815	Hordeum vulgare L. convar. vulgare var. violaceum Körn.	6	n		Denmark	336	336	210	210	200	200	174	174	174	174	250	250	267	267	244	244	254	254	214	214	224	224	286	286	274	274	278	278	213	213	258	258	210	210	351	351	204	204	296	296	294	294
1430	1430_2	HOR2558	Hordeum vulgare L. convar. vulgare var. duplinigrum Körn.	6	n		Ethiopia	351	351	195	195	200	200	174	174	174	174	230	230	264	264	246	246	264	264	214	214	224	224	286	286	282	282	278	278	222	222	267	267	210	210	336	336	200	200	296	296	302	302
1431	1431_2	HOR2876	Hordeum vulgare L. convar. vulgare var. coeleste L.	6	n		Ethiopia	351	351	195	195	200	200	177	177	174	174	230	230	264	264	244	244	266	266	214	214	224	224	290	290	276	276	282	282	216	216	267	267	210	210	336	336	200	200	296	296	302	302
1432	1432_1	HOR2877	Hordeum vulgare L. convar. vulgare var. himalayense (Rittig) Körn.	6	n		Ethiopia	351	351	195	195	200	200	174	174	174	174	230	230	264	264	246	246	266	266	214	214	224	224	286	286	284	284	282	282	216	216	267	267	210	210	336	336	200	200	296	296	302	302
1433	1433_4	HOR2878	Hordeum vulgare L. convar. vulgare var. violaceum Körn.	6	n		Ethiopia	351	351	192	192	202	202	174	174	174	174	230	230	264	264	246	246	264	264	214	214	224	224	286	286	284	284	282	282	216	216	267	267	210	210	336	336	200	200	296	296	302	302
1434	1434_1	HOR2879	Hordeum vulgare L. convar. vulgare var. himalayense (Rittig) Körn.	6	n		Ethiopia	351	351	192	192	200	200	174	174	174	174	230	230	264	264	-99999	-99999	264	264	214	214	224	224	286	286	284	284	282	282	216	216	267	267	210	210	336	336	200	200	296	296	302	302
1435	1435_3	HOR3285	Hordeum vulgare L. convar. vulgare var. revelatum Körn.	6	n		Ethiopia	351	351	192	192	200	200	159	174	174	174	230	230	264	264	246	246	266	266	214	214	224	224	290	290	276	276	282	282	216	216	267	267	210	210	336	336	200	200	296	296	302	302
1436	1436_2	HOR3567	Hordeum vulgare L. convar. vulgare var. coeleste L.	6	n		Ethiopia	351	351	192	192	200	200	174	174	174	174	230	230	264	264	246	246	-99999	-99999	214	214	224	224	290	290	284	284	282	282	216	216	267	267	-99999	-99999	336	336	200	200	296	296	302	302
1437	1437_2	HOR3568	Hordeum vulgare L. convar. vulgare var. coeleste L.	6	n		Ethiopia	351	351	195	195	200	200	168	177	174	174	230	230	264	264	244	244	-99999	-99999	214	214	224	224	286	286	284	284	282	282	216	216	267	267	-99999	-99999	336	336	200	200	296	296	302	302
1438	1438_1	HOR3569	Hordeum vulgare L. convar. vulgare var. coeleste L.	6	n		Ethiopia	351	351	192	192	202	202	174	174	174	174	218	218	264	264	244	244	264	264	214	214	224	224	286	286	284	284	282	282	216	216	267	267	210	210	339	345	200	200	296	296	302	302
1439	1439_2	HOR3570	Hordeum vulgare L. convar. vulgare var. coeleste L.	6	n		Ethiopia	351	351	195	195	202	202	168	168	174	174	230	230	264	264	246	246	264	264	214	214	224	224	290	290	282	282	282	282	216	216	267	267	210	210	336	336	200	200	296	296	302	302
1440	1440_1	HOR3571	Hordeum vulgare L. convar. vulgare var. coeleste L.	6	n		Ethiopia	351	351	195	195	200	200	177	177	174	174	230	230	264	264	244	244	264	264	214	214	224	224	286	286	284	284	282	282	216	216	267	267	210	210	339	345	200	200	296	296	302	302
1441	1441_2	HOR3573	Hordeum vulgare L. convar. vulgare var. coeleste L.	6	n		Ethiopia	351	351	195	195	200	200	174	174	174	174	202	202	264	264	244	244	266	266	214	214	224	224	290	290	282	282	282	282	216	216	267	267	210	210	339	345	196	200	296	296	302	302
1442	1442_2	HOR3574	Hordeum vulgare L. convar. vulgare var. adis-abebae (Vavilov & Orlov) Mansf.	6	n		Ethiopia	351	351	-99999	-99999	200	200	174	174	174	174	230	230	264	264	244	244	-99999	-99999	214	214	224	224	290	290	282	282	-99999	-99999	216	216	267	267	-99999	-99999	345	345	200	200	-99999	-99999	-99999	-99999
1443	1443_3	HOR3575	Hordeum vulgare L. convar. vulgare var. himalayense (Rittig) Körn.	6	n		Ethiopia	351	351	192	192	200	200	174	174	174	174	230	230	264	264	246	246	266	266	214	214	224	224	290	290	276	276	278	278	216	216	267	267	210	210	336	336	200	200	296	296	302	302
1444	1444_1	HOR3576	Hordeum vulgare L. convar. vulgare var. himalayense (Rittig) Körn.	6	n		Ethiopia	351	351	192	192	200	200	174	174	174	174	230	230	264	264	246	246	266	266	214	214	224	224	290	290	276	276	278	278	216	216	267	267	210	210	336	336	200	200	296	296	302	302
1445	1445_1	HOR3577	Hordeum vulgare L. convar. vulgare var. duplinigrum Körn.	6	n		Ethiopia	351	351	195	195	202	202	177	177	174	174	230	230	264	264	244	244	264	264	214	214	224	224	290	290	282	282	278	278	216	216	267	267	210	210	336	336	200	200	296	296	302	302
1446	1446_1	HOR3584	Hordeum vulgare L. convar. vulgare var. coeleste L.	6	n		Ethiopia	351	351	192	192	200	200	174	174	174	174	230	230	264	264	246	246	266	266	214	214	224	224	290	290	276	276	278	278	216	216	267	267	-99999	-99999	336	336	200	200	296	296	302	302
1447	1447_3	HOR3585	Hordeum vulgare L. convar. vulgare var. duplinigrum Körn.	6	n		Ethiopia	351	351	192	192	200	200	177	177	174	174	230	230	264	264	246	246	264	264	214	214	224	224	290	290	276	276	282	282	216	216	267	267	210	210	336	336	200	200	296	296	302	302
1448	1448_4	HOR4620	Hordeum vulgare L. convar. vulgare var. trifurcatum (Schlecht.) Wender.	6	n		Ethiopia	351	351	210	210	200	200	177	177	174	174	250	250	267	267	246	246	254	254	214	214	228	228	290	290	282	282	278	278	213	213	258	258	207	207	351	351	208	208	296	296	302	302
1449	1449_1	HOR4791	Hordeum vulgare L. convar. vulgare var. duplinigrum Körn.	6	n		Ethiopia	351	351	195	195	202	202	174	174	174	174	230	230	264	264	246	246	252	264	214	214	224	224	286	286	282	282	278	278	219	219	267	267	204	204	336	336	200	200	296	296	302	302
1450	1450_1	HOR5165	Hordeum vulgare L. convar. vulgare var. himalayense (Rittig) Körn.	6	n		Ethiopia	351	351	195	195	200	200	174	174	174	174	230	230	264	264	246	246	266	266	214	214	224	224	290	290	276	276	278	278	216	216	267	267	210	210	339	345	200	200	296	296	302	302
1451	1451_3	HOR5195	Hordeum vulgare L. convar. vulgare var. duplinigrum Körn.	6	n		Ethiopia	336	351	195	210	200	200	174	177	174	174	230	258	264	267	246	246	274	274	214	214	224	224	286	286	276	276	278	278	216	216	258	267	210	210	345	345	200	204	296	296	304	304
1452	1452_1	HOR5212	Hordeum vulgare L. convar. vulgare var. duplinigrum Körn.	6	n		Ethiopia	351	351	195	195	200	200	177	177	174	174	202	202	264	264	246	246	258	258	214	214	224	224	286	286	276	276	278	278	216	216	267	267	210	210	339	345	200	200	296	296	302	302
1453	1453_3	HOR5214	Hordeum vulgare L. convar. vulgare var. adis-abebae (Vavilov & Orlov) Mansf.	6	n		Ethiopia	351	351	195	195	200	200	177	177	174	174	202	202	264	264	246	246	266	266	214	214	228	228	286	286	278	278	278	278	216	216	267	267	210	210	345	345	200	200	296	296	302	302
1454	1454_1	HOR5218	Hordeum vulgare L. convar. vulgare var. violaceum Körn.	6	n		Ethiopia	351	351	195	195	200	200	177	177	174	174	202	202	264	264	246	246	266	266	214	214	224	224	286	286	278	278	278	278	216	216	267	267	210	210	339	339	200	200	296	296	302	302
1455	1455_2	HOR5230	Hordeum vulgare L. convar. vulgare var. himalayense (Rittig) Körn.	6	n		Ethiopia	351	351	195	195	200	200	174	174	174	174	202	202	264	264	246	246	266	266	214	214	224	224	286	286	284	284	278	278	216	216	267	267	210	210	351	351	200	200	296	296	302	302
1456	1456_1	HOR5360	Hordeum vulgare L. convar. vulgare var. himalayense (Rittig) Körn.	6	n		Ethiopia	351	351	195	195	200	200	174	174	174	174	230	230	264	264	-99999	-99999	266	266	214	214	224	224	290	290	276	276	278	278	216	216	267	267	210	210	345	345	200	200	296	296	302	302
1457	1457_1	HOR5386	Hordeum vulgare L. convar. vulgare var. duplinigrum Körn.	6	n		Ethiopia	351	351	195	195	200	200	177	177	174	174	202	202	264	264	246	246	264	264	214	214	224	224	286	286	276	276	278	278	216	216	267	267	210	210	339	345	200	200	296	296	302	302
1458	1458_1	HOR5404	Hordeum vulgare L. convar. vulgare var. himalayense (Rittig) Körn.	6	n		Ethiopia	351	351	195	195	202	202	177	177	174	174	202	202	264	264	246	246	264	264	214	214	224	224	286	290	284	284	278	278	216	216	267	267	210	210	339	339	200	200	296	296	302	302
1459	1459_1	HOR5418	Hordeum vulgare L. convar. vulgare var. coeleste L.	6	n		Ethiopia	351	351	195	195	200	200	174	174	174	174	202	202	264	264	246	246	266	266	214	214	224	224	286	286	282	282	282	282	216	216	267	267	210	210	345	345	200	200	296	296	302	302
1460	1460_2	HOR5544	Hordeum vulgare L. convar. vulgare var. coeleste L.	6	n		Ethiopia	351	351	195	195	200	200	174	174	174	174	202	202	264	264	246	246	266	266	214	214	224	224	286	286	284	284	278	278	216	216	267	267	210	210	345	345	200	200	296	296	302	302
1461	1461_3	HOR5545	Hordeum vulgare L. convar. vulgare var. coeleste L.	6	n		Ethiopia	351	351	195	195	200	200	174	174	174	174	202	202	264	264	246	246	266	266	214	214	224	224	286	286	284	284	278	278	213	213	267	267	210	210	345	345	200	200	296	296	302	302
1462	1462_4	HOR5546	Hordeum vulgare L. convar. vulgare var. coeleste L.	6	n		Ethiopia	351	351	195	195	200	200	174	174	174	174	202	202	264	264	246	246	266	266	214	214	224	224	286	286	284	284	278	278	216	216	267	267	210	210	345	345	200	200	296	296	302	302
1463	1463_3	HOR5547	Hordeum vulgare L. convar. vulgare var. duplinigrum Körn.	6	n		Ethiopia	351	351	195	195	200	200	174	174	174	174	230	230	264	264	246	246	266	266	214	214	224	224	286	286	276	276	278	278	216	216	267	267	210	210	345	345	200	200	296	296	302	302
1464	1464_2	HOR5548	Hordeum vulgare L. convar. vulgare var. himalayense (Rittig) Körn.	6	n		Ethiopia	351	351	195	195	200	200	174	174	174	174	202	202	264	264	246	246	266	266	214	214	224	224	286	286	284	284	278	278	216	216	267	267	210	210	345	345	200	200	296	296	302	302
1465	1465_1	HOR5557	Hordeum vulgare L. convar. vulgare var. coeleste L.	6	n		Ethiopia	351	351	195	195	200	200	174	174	174	174	202	202	264	264	-99999	-99999	266	266	214	214	224	224	286	286	284	284	278	278	216	216	267	267	210	210	345	345	200	200	296	296	302	302
1466	1466_2	HOR5562	Hordeum vulgare L. convar. vulgare var. coeleste L.	6	n		Ethiopia	351	351	195	195	200	200	174	174	174	174	202	202	264	264	-99999	-99999	266	266	214	214	224	224	286	286	284	284	282	282	216	216	267	267	210	210	345	345	200	200	296	296	302	302
1467	1467_3	HOR5563	Hordeum vulgare L. convar. vulgare var. nudipyramidatum Körn.	6	n		Ethiopia	351	351	195	195	200	200	174	174	174	174	202	202	264	264	246	246	264	264	214	214	224	224	286	286	284	284	282	282	213	213	267	267	210	210	345	345	200	200	296	296	302	302
1468	1468_3	HOR5564	Hordeum vulgare L. convar. vulgare var. himalayense (Rittig) Körn.	6	n		Ethiopia	351	351	195	195	200	200	174	174	174	174	202	202	264	264	246	246	266	266	214	214	224	224	286	286	284	284	282	282	216	216	267	267	210	210	345	345	200	200	296	296	302	302
1469	1469_3	HOR5565	Hordeum vulgare L. convar. vulgare var. coeleste L.	6	n		Ethiopia	351	351	195	195	200	200	174	174	174	174	202	202	264	264	246	246	-99999	-99999	214	214	224	224	286	286	282	282	282	282	216	216	267	267	210	210	345	345	200	200	296	296	302	302
1470	1470_1	HOR5566	Hordeum vulgare L. convar. vulgare var. himalayense (Rittig) Körn.	6	n		Ethiopia	351	351	195	195	200	200	174	174	174	174	202	202	264	264	246	246	-99999	-99999	214	214	224	224	286	286	288	288	282	282	216	216	267	267	210	210	345	345	200	200	296	296	302	302
1471	1471_2	HOR5567	Hordeum vulgare L. convar. vulgare var. coeleste L.	6	n		Ethiopia	351	351	195	195	200	200	174	174	174	174	202	202	264	264	246	246	266	266	214	214	224	224	286	286	284	284	282	282	216	216	267	267	210	210	345	345	200	200	296	296	302	302
1472	1472_2	HOR5568	Hordeum vulgare L. convar. vulgare var. himalayense (Rittig) Körn.	6	n		Ethiopia	351	351	195	195	200	200	174	174	174	174	202	202	264	264	246	246	266	266	214	214	224	224	286	286	284	284	282	282	216	216	267	267	210	210	336	336	200	200	296	296	302	302
1473	1473_3	HOR5591	Hordeum vulgare L. convar. vulgare var. coeleste L.	6	n		Ethiopia	351	351	195	195	200	200	174	174	174	174	202	202	264	264	246	246	266	266	214	214	224	224	286	286	282	282	282	282	216	216	267	267	210	210	345	345	200	200	296	296	302	302
1474	1474_3	HOR5594	Hordeum vulgare L. convar. vulgare var. coeleste L.	6	n		Ethiopia	351	351	195	195	200	200	177	177	174	174	230	230	264	264	246	246	266	266	214	214	224	224	286	286	278	278	278	278	213	213	267	267	210	210	336	336	200	200	296	296	302	302
1475	1475_2	HOR5682	Hordeum vulgare L. convar. vulgare var. coeleste L.	6	n		Ethiopia	351	351	195	195	200	200	174	174	174	174	202	202	264	264	246	246	266	266	214	214	224	224	286	286	282	282	282	282	216	216	267	267	210	210	345	345	200	200	296	296	302	302
1476	1476_2	HOR5692	Hordeum vulgare L. convar. vulgare var. coeleste L.	6	n		Ethiopia	351	351	195	195	200	200	174	174	174	174	202	202	264	264	246	246	264	264	214	214	224	224	286	286	282	282	282	282	216	216	267	267	210	210	336	336	200	200	296	296	302	302
1477	1477_1	HOR5694	Hordeum vulgare L. convar. vulgare var. revelatum Körn.	6	n		Ethiopia	351	351	195	195	200	200	174	174	174	174	202	202	264	264	246	246	264	264	214	214	224	224	286	286	284	284	282	282	213	213	267	267	210	210	345	345	200	200	296	296	302	302
1478	1478_2	HOR5696	Hordeum vulgare L. convar. vulgare var. himalayense (Rittig) Körn.	6	n		Ethiopia	351	351	195	195	200	200	174	174	174	174	202	202	264	264	246	246	266	266	214	214	224	224	286	286	284	284	282	282	216	216	267	267	210	210	345	345	200	200	296	296	302	302
1479	1479_1	HOR5697	Hordeum vulgare L. convar. vulgare var. coeleste L.	6	n		Ethiopia	351	351	195	195	202	202	174	174	174	174	230	230	264	264	246	246	264	264	214	214	224	224	286	286	286	286	282	282	213	213	267	267	210	210	336	336	200	200	296	296	302	302
1480	1480_4	HOR5698	Hordeum vulgare L. convar. vulgare var. duplinigrum Körn.	6	n		Ethiopia	264	264	195	195	200	200	174	174	174	174	202	202	264	264	244	244	264	264	214	214	224	224	286	286	282	282	282	282	213	213	267	267	210	210	336	336	200	200	296	296	302	302
1481	1481_3	HOR5703	Hordeum vulgare L. convar. vulgare var. coeleste L.	6	n		Ethiopia	351	351	195	195	200	200	174	174	174	174	202	202	264	264	246	246	266	266	214	214	224	224	286	286	282	282	278	278	213	213	267	267	210	210	345	345	200	200	296	296	302	302
1483	1483_3	HOR5715	Hordeum vulgare L. convar. vulgare var. revelatum Körn.	6	n		Ethiopia	351	351	195	195	200	200	174	174	174	174	222	222	264	264	246	246	264	264	214	214	224	224	286	286	286	286	278	278	213	213	267	267	210	210	336	336	200	200	296	296	302	302
1484	1484_3	HOR5920	Hordeum vulgare L. convar. vulgare var. himalayense (Rittig) Körn.	6	n		Ethiopia	351	351	195	195	200	200	174	174	174	174	230	230	264	264	246	246	266	266	214	214	224	224	286	286	282	282	282	282	216	216	267	267	210	210	345	345	200	200	296	296	302	302
1485	1485_2	HOR5957	Hordeum vulgare L. convar. vulgare var. coeleste L.	6	n		Ethiopia	351	351	195	195	200	200	174	174	174	174	230	230	264	264	246	246	266	266	214	214	-99999	-99999	288	288	282	282	282	282	213	213	267	267	204	204	336	336	200	200	296	296	302	302
1486	1486_3	HOR5958	Hordeum vulgare L. convar. vulgare var. himalayense (Rittig) Körn.	6	n		Ethiopia	351	351	195	195	200	200	174	174	174	174	230	230	264	264	246	246	266	266	214	214	224	224	286	286	284	284	282	282	216	216	267	267	210	210	336	336	200	200	296	296	302	302
1487	1487_2	HOR5959	Hordeum vulgare L. convar. vulgare var. coeleste L.	6	n		Ethiopia	351	351	-99999	-99999	200	200	174	174	174	174	202	202	264	264	246	246	266	266	214	214	224	224	286	286	284	284	-99999	-99999	216	216	267	267	210	210	336	336	200	200	-99999	-99999	302	302
1488	1488_1	HOR5960	Hordeum vulgare L. convar. vulgare var. duplinigrum Körn.	6	n		Ethiopia	351	351	195	195	200	200	174	174	174	174	230	230	264	264	246	246	264	264	214	214	224	224	286	286	282	282	278	278	216	216	267	267	210	210	336	336	200	200	296	296	302	302
1489	1489_2	HOR5961	Hordeum vulgare L. convar. vulgare var. duplinigrum Körn.	6	n		Ethiopia	351	351	195	195	200	200	174	174	174	174	230	230	264	264	246	246	264	264	214	214	224	224	286	286	282	282	278	278	216	216	267	267	210	210	336	336	200	200	296	296	302	302
1490	1490_1	HOR5975	Hordeum vulgare L. convar. vulgare var. revelatum Körn.	6	n		Ethiopia	351	351	192	192	200	200	174	174	174	174	230	230	264	264	244	244	264	264	214	214	224	224	290	290	276	276	282	282	216	216	267	267	210	210	336	336	200	200	296	296	302	302
1491	1491_2	HOR6131	Hordeum vulgare L. convar. vulgare var. coeleste L.	6	n		Ethiopia	351	351	189	189	200	200	165	165	174	174	230	230	264	264	-99999	-99999	254	266	214	214	233	233	286	286	282	282	282	282	222	222	267	267	210	210	339	345	200	200	296	296	302	302
1492	1492_1	HOR6132	Hordeum vulgare L. convar. vulgare var. coeleste L.	6	n		Ethiopia	351	351	195	195	200	200	174	174	174	174	202	202	264	264	246	246	266	266	214	214	224	224	286	286	282	282	278	278	216	216	267	267	210	210	345	345	200	200	296	296	302	302
1493	1493_3	HOR6134	Hordeum vulgare L. convar. vulgare var. himalayense (Rittig) Körn.	6	n		Ethiopia	351	351	195	195	200	200	174	174	174	174	230	230	264	264	246	246	266	266	214	214	224	224	286	286	282	282	282	282	216	216	267	267	210	210	339	345	200	200	296	296	302	302
1494	1494_1	HOR6356	Hordeum vulgare L. convar. vulgare var. coeleste L.	6	n		Ethiopia	351	351	189	195	200	200	174	174	174	174	230	230	264	264	246	246	264	264	214	214	224	224	286	286	284	284	282	282	216	216	267	267	210	210	339	345	200	200	296	296	302	302
1495	1495_3	HOR6360	Hordeum vulgare L. convar. vulgare var. revelatum Körn.	6	n		Ethiopia	351	351	195	195	202	202	174	174	174	174	230	230	264	264	246	246	264	264	214	214	224	224	286	286	286	286	282	282	213	213	267	267	210	210	336	336	200	200	296	296	302	302
1496	1496_1	HOR6361	Hordeum vulgare L. convar. vulgare var. revelatum Körn.	6	n		Ethiopia	351	351	195	195	202	202	174	174	174	174	230	230	264	264	246	246	264	264	214	214	224	224	286	286	286	286	282	282	213	213	267	267	210	210	336	336	200	200	296	296	302	302
1499	1499_1	HOR6389	Hordeum vulgare L. convar. vulgare var. coeleste L.	6	n		Ethiopia	351	351	195	195	200	200	177	177	174	174	202	202	264	264	246	246	264	264	214	214	224	224	286	286	276	276	278	278	216	216	267	267	210	210	336	336	200	200	296	296	302	302
1500	1500_1	HOR6404	Hordeum vulgare L. convar. vulgare var. duplinigrum Körn.	6	n		Ethiopia	351	351	195	195	200	200	177	177	174	174	230	230	264	264	246	246	266	266	214	214	224	224	286	286	276	276	278	278	216	216	267	267	210	210	336	336	200	200	296	296	302	302
1502	1502_2	HOR6453	Hordeum vulgare L. convar. vulgare var. coeleste L.	6	n		Ethiopia	351	351	195	195	200	200	162	162	165	174	218	218	264	264	246	246	264	264	214	214	224	224	286	286	284	284	282	282	216	216	267	267	210	210	339	345	200	200	296	296	302	302
1503	1503_2	HOR6454	Hordeum vulgare L. convar. vulgare var. himalayense (Rittig) Körn.	6	n		Ethiopia	351	351	195	195	200	200	174	174	174	174	230	230	264	264	246	246	264	264	214	214	224	224	286	286	284	284	282	282	216	216	267	267	210	210	345	345	200	200	296	296	302	302
1504	1504_1	HOR6462	Hordeum vulgare L. convar. vulgare var. coeleste L.	6	n		Ethiopia	351	351	195	195	200	200	174	174	174	174	202	202	264	264	246	246	266	266	214	214	224	224	286	286	282	282	282	282	216	216	267	267	210	210	345	345	200	200	296	296	302	302
1505	1505_1	HOR6474	Hordeum vulgare L. convar. vulgare var. coeleste L.	6	n		Ethiopia	351	351	195	195	200	200	174	174	174	174	230	230	264	264	246	246	266	266	214	214	224	224	286	286	284	284	282	282	216	216	267	267	210	210	345	345	200	200	296	296	302	302
1506	1506_1	HOR6477	Hordeum vulgare L. convar. vulgare var. himalayense (Rittig) Körn.	6	n		Ethiopia	351	351	195	195	200	200	174	174	174	174	230	230	264	264	246	246	266	266	214	214	224	224	286	286	284	284	282	282	216	216	267	267	210	210	345	345	200	200	296	296	302	302
1507	1507_1	HOR6479	Hordeum vulgare L. convar. vulgare var. himalayense (Rittig) Körn.	6	n		Ethiopia	351	351	195	195	200	200	174	174	174	174	202	202	264	264	246	246	266	266	214	214	224	224	286	286	284	284	282	282	216	216	267	267	210	210	345	345	200	200	296	296	302	302
1508	1508_2	HOR6681	Hordeum vulgare L. convar. vulgare var. revelatum Körn.	6	n		Ethiopia	351	351	192	192	200	200	177	177	174	174	230	230	264	264	246	246	266	266	214	214	224	224	290	290	276	276	282	282	216	216	267	267	210	210	336	336	200	200	296	296	302	302
1509	1509_2	HOR6690	Hordeum vulgare L. convar. vulgare var. duplinigrum Körn.	6	n		Ethiopia	351	351	195	195	200	200	174	174	174	174	230	230	264	264	246	246	266	266	214	214	224	224	286	286	276	276	282	282	216	216	267	267	210	210	336	336	200	200	296	296	302	302
1510	1510_1	HOR6699	Hordeum vulgare L. convar. vulgare var. duplinigrum Körn.	6	n		Ethiopia	351	351	195	195	200	200	174	174	174	174	202	202	264	264	246	246	266	266	214	214	224	224	286	286	276	276	278	278	216	216	267	267	210	210	336	336	200	200	296	296	302	302
1511	1511_2	HOR6703	Hordeum vulgare L. convar. vulgare var. nudipyramidatum Körn.	6	n		Ethiopia	351	351	195	195	200	200	174	174	174	174	202	202	264	264	246	246	264	264	214	214	224	224	286	286	284	284	278	278	213	213	267	267	210	210	339	345	200	200	296	296	302	302
1512	1512_2	HOR6833	Hordeum vulgare L. convar. vulgare var. himalayense (Rittig) Körn.	6	n		Ethiopia	351	351	195	195	200	200	174	174	174	174	202	202	264	264	246	246	266	266	214	214	224	224	286	286	282	282	282	282	216	216	267	267	210	210	345	345	200	200	296	296	302	302
1513	1513_1	HOR6847	Hordeum vulgare L. convar. vulgare var. duplinigrum Körn.	6	n		Ethiopia	351	351	195	195	200	200	174	174	174	174	202	202	264	264	246	246	266	266	214	214	224	224	286	286	276	276	278	278	216	216	267	267	210	210	336	336	200	200	296	296	302	302
1514	1514_2	HOR6848	Hordeum vulgare L. convar. vulgare var. duplinigrum Körn.	6	n		Ethiopia	351	351	195	195	200	200	174	174	174	174	202	202	264	264	246	246	266	266	214	214	224	224	286	286	284	284	278	278	216	216	267	267	210	210	339	345	200	200	296	296	302	302
1515	1515_3	HOR6858	Hordeum vulgare L. convar. vulgare var. duplinigrum Körn.	6	n		Ethiopia	351	351	195	195	200	200	159	159	174	174	202	202	264	264	246	246	266	266	214	214	224	224	286	286	284	284	278	278	216	216	267	267	210	210	345	345	200	200	296	296	302	302
1516	1516_1	HOR6862	Hordeum vulgare L. convar. vulgare var. coeleste L.	6	n		Ethiopia	351	351	-99999	-99999	200	200	174	174	174	174	190	190	264	264	246	246	266	266	214	214	224	224	286	286	276	276	-99999	-99999	216	216	267	267	210	210	345	345	200	200	-99999	-99999	302	302
1517	1517_3	HOR6863	Hordeum vulgare L. convar. vulgare var. duplinigrum Körn.	6	n		Ethiopia	351	351	195	195	200	200	174	174	174	174	202	202	264	264	248	248	266	266	214	214	228	228	286	286	284	284	278	278	216	216	267	267	210	210	345	345	200	200	296	296	302	302
1518	1518_4	HOR6877	Hordeum vulgare L. convar. vulgare var. duplinigrum Körn.	6	n		Ethiopia	351	351	195	195	200	200	174	174	174	174	230	230	264	264	246	246	266	266	214	214	224	224	286	286	276	276	282	282	216	216	267	267	210	210	345	345	200	200	296	296	302	302
1519	1519_2	HOR6884	Hordeum vulgare L. convar. vulgare var. revelatum Körn.	6	n		Ethiopia	351	351	195	195	200	200	174	174	174	174	202	202	264	264	246	246	264	264	214	214	224	224	286	286	284	284	278	278	213	213	267	267	210	210	345	345	200	200	296	296	302	302
1520	1520_3	HOR9065	Hordeum vulgare L. convar. vulgare var. duplinigrum Körn.	6	n		Ethiopia	351	351	195	195	200	200	174	174	174	174	202	202	264	264	246	246	264	264	214	214	228	228	286	286	286	286	282	282	216	216	264	264	210	210	345	345	200	200	296	296	302	302
1521	1521_4	HOR9496	Hordeum vulgare L. convar. vulgare var. himalayense (Rittig) Körn.	6	n		Ethiopia	351	351	195	195	200	200	174	174	174	174	230	230	264	264	246	246	266	266	214	214	224	224	290	290	276	276	278	278	216	216	267	267	210	210	345	345	200	200	296	296	302	302
1522	1522_2	HOR10303	Hordeum vulgare L. convar. vulgare var. coeleste L.	6	n		Ethiopia	351	351	195	195	200	200	174	174	174	174	202	202	264	264	246	246	266	266	214	214	224	224	286	286	282	282	282	282	216	216	267	267	210	210	345	345	200	200	296	296	302	302
1523	1523_3	HOR10351	Hordeum vulgare L. convar. vulgare var. coeleste L.	6	n		Ethiopia	351	351	195	195	200	200	174	174	174	174	230	230	264	264	246	246	264	264	214	214	224	224	286	286	276	276	278	278	216	216	267	267	210	210	336	336	200	200	296	296	302	302
1524	1524_2	HOR10485	Hordeum vulgare L. convar. vulgare var. himalayense (Rittig) Körn.	6	n		Ethiopia	351	351	195	195	200	200	174	174	174	174	230	230	264	264	246	246	266	266	214	214	224	224	286	286	284	284	282	282	216	216	267	267	210	210	345	345	200	200	296	296	302	302
1525	1525_2	HOR10520	Hordeum vulgare L. convar. vulgare var. himalayense (Rittig) Körn.	6	n		Ethiopia	351	351	195	195	200	200	174	174	174	174	230	230	264	264	246	246	264	264	214	214	224	224	286	286	282	282	278	278	213	213	267	267	210	210	336	336	200	200	296	296	302	302
1526	1526_2	HOR10521	Hordeum vulgare L. convar. vulgare var. himalayense (Rittig) Körn.	6	n		Ethiopia	351	351	195	195	200	200	174	174	174	174	230	230	264	264	246	246	264	264	214	214	224	224	286	286	276	276	278	278	216	216	267	267	204	204	336	336	200	200	296	296	302	302
1527	1527_4	HOR10524	Hordeum vulgare L. convar. vulgare var. coeleste L.	6	n		Ethiopia	351	351	195	195	200	200	165	165	174	174	230	230	264	264	246	246	252	264	214	214	224	224	286	286	276	276	278	278	216	216	267	267	210	210	336	336	200	200	296	296	302	302
1528	1528_1	HOR11412	Hordeum vulgare L. convar. vulgare var. coeleste L.	6	n		Ethiopia	351	351	195	195	200	200	177	177	174	174	202	202	264	264	246	246	266	266	214	214	224	224	286	286	276	276	278	278	213	213	267	267	210	210	339	345	200	200	296	296	302	302
1529	1529_3	HOR11425	Hordeum vulgare L. convar. vulgare var. coeleste L.	6	n		Ethiopia	351	351	195	195	200	200	174	174	174	174	202	202	264	264	246	246	266	266	214	214	224	224	286	286	282	282	282	282	216	216	267	267	210	210	345	345	200	200	296	296	302	302
1530	1530_1	HOR11438	Hordeum vulgare L. convar. vulgare var. coeleste L.	6	n		Ethiopia	351	351	195	195	200	200	174	174	174	174	230	230	264	264	246	246	266	266	214	214	224	224	286	286	282	282	282	282	216	216	267	267	210	210	339	345	200	200	296	296	302	302
1531	1531_3	HOR11439	Hordeum vulgare L. convar. vulgare var. violaceum Körn.	6	n		Ethiopia	351	351	195	195	202	202	174	174	174	174	230	230	264	264	246	246	264	264	-99999	-99999	224	224	286	286	282	282	282	282	213	213	267	267	210	210	339	345	200	200	296	296	302	302
1532	1532_2	HOR11444	Hordeum vulgare L. convar. vulgare var. himalayense (Rittig) Körn.	6	n		Ethiopia	351	351	195	195	202	202	174	174	174	174	230	230	264	264	246	246	264	264	214	214	224	224	286	286	286	286	282	282	213	213	267	267	210	210	336	336	200	216	296	296	302	302
1533	1533_2	HOR11462	Hordeum vulgare L. convar. vulgare var. coeleste L.	6	n		Ethiopia	351	351	195	195	200	200	171	171	174	174	230	230	264	264	246	246	-99999	-99999	214	214	224	224	286	286	278	278	278	278	216	216	267	267	-99999	-99999	336	336	200	200	296	296	302	302
1534	1534_2	HOR11464	Hordeum vulgare L. convar. vulgare var. coeleste L.	6	n		Ethiopia	351	351	195	195	200	200	171	171	174	174	222	222	264	264	246	246	266	266	214	214	224	224	286	286	278	278	278	278	216	216	267	267	204	204	336	336	200	212	296	296	302	302
1535	1535_4	HOR11467	Hordeum vulgare L. convar. vulgare var. coeleste L.	6	n		Ethiopia	351	351	195	195	202	202	174	174	174	174	230	230	264	264	246	246	264	264	214	214	224	224	286	286	278	278	278	278	213	213	267	267	210	210	336	336	200	200	296	296	302	302
1536	1536_2	HOR11468	Hordeum vulgare L. convar. vulgare var. himalayense (Rittig) Körn.	6	n		Ethiopia	351	351	195	195	200	200	177	177	174	174	222	222	264	264	246	246	254	266	214	214	224	224	286	286	278	278	278	278	207	216	267	267	210	210	336	336	200	200	296	296	302	302
1537	1537_1	HOR11469	Hordeum vulgare L. convar. vulgare var. coeleste L.	6	n		Ethiopia	351	351	195	195	202	202	174	174	165	174	230	230	264	264	246	246	-99999	-99999	214	214	224	224	286	286	278	278	278	278	216	216	267	267	-99999	-99999	336	336	200	200	296	296	292	292
1538	1538_1	HOR2021	Hordeum vulgare L. convar. vulgare var. violaceum Körn.	6	n		France	351	351	192	192	202	202	177	177	174	174	230	230	264	264	246	246	266	266	214	214	224	224	286	286	276	276	278	278	216	216	267	267	210	210	336	336	200	200	296	296	302	302
1540	1540_1	HOR11443	Hordeum vulgare L. convar. vulgare var. coeleste L.	6	n		Germany	351	351	192	192	200	200	174	174	174	174	230	230	264	264	244	244	266	266	214	214	224	224	290	290	284	284	282	282	216	216	267	267	210	210	336	336	200	200	296	296	302	302
1541	1541_2	HOR133	Hordeum vulgare L. convar. vulgare var. violaceum Körn.	6	n		Greece	261	261	210	210	200	200	-99999	-99999	174	174	250	250	267	267	244	244	258	258	214	214	224	224	286	286	274	274	278	278	213	213	258	258	207	207	351	351	196	204	296	296	294	294
1542	1542_3	HOR1975	Hordeum vulgare L. convar. vulgare var. coeleste L.	6	n		Hungary	261	261	195	195	196	196	177	177	165	165	266	266	264	264	244	244	264	264	214	214	224	224	286	286	278	278	278	278	216	216	264	264	207	207	336	336	212	212	296	296	304	304
1543	1543_1	HOR139	Hordeum vulgare L. convar. vulgare var. coeleste L.	6	n		Italy	351	351	195	195	200	200	174	174	174	174	230	230	264	264	246	246	266	266	214	214	224	224	286	286	282	282	282	282	216	216	267	267	210	210	339	345	200	200	296	296	302	302
1544	1544_2	HOR1366	Hordeum vulgare L. convar. vulgare var. coeleste L.	6	n		Italy	351	351	195	195	202	202	183	183	174	174	230	230	264	264	244	244	254	254	214	214	224	224	290	290	276	276	282	282	216	216	267	267	210	210	339	339	204	204	296	296	304	304
1545	1545_1	HOR4456	Hordeum vulgare L. convar. vulgare var. coeleste L.	6	n		Italy	261	261	195	195	202	202	177	177	165	165	262	262	267	267	244	244	254	254	216	216	228	228	286	286	274	274	278	278	210	210	267	267	210	210	351	351	204	204	296	296	294	294
1546	1546_2	HOR11124	Hordeum vulgare L. convar. vulgare var. coeleste L.	6	n		Italy	261	261	195	195	202	202	177	177	165	165	262	262	267	267	244	244	254	254	216	216	228	228	286	286	274	274	278	278	210	210	267	267	210	210	351	351	204	204	296	296	294	294
1547	1547_1	HOR10152	Hordeum vulgare L. convar. vulgare var. coeleste L.	6	n		Libya	351	351	195	195	200	200	174	174	165	165	246	246	264	264	244	244	256	256	214	214	228	228	286	286	274	274	278	278	210	210	258	258	207	207	351	351	204	204	288	288	302	302
1548	1548_2	HOR10154	Hordeum vulgare L. convar. vulgare var. adis-abebae (Vavilov & Orlov) Mansf.	6	n		Libya	351	351	195	195	202	202	165	174	165	165	246	246	264	264	244	244	262	262	214	214	228	228	286	286	286	286	278	278	210	210	267	267	207	207	339	345	208	208	288	288	302	302
1549	1549_2	HOR10159	Hordeum vulgare L. convar. vulgare var. adis-abebae (Vavilov & Orlov) Mansf.	6	n		Libya	351	351	201	201	212	212	174	174	165	165	246	246	264	264	246	246	262	262	214	214	224	224	286	286	286	286	278	278	219	219	267	267	207	207	345	345	208	208	288	288	302	302
1550	1550_3	HOR11465	Hordeum vulgare L. convar. vulgare var. coeleste L.	6	n		Marocco	351	351	195	195	200	200	174	174	174	174	230	230	264	264	246	246	264	264	214	214	224	224	286	286	278	278	278	278	216	216	267	267	-99999	-99999	336	336	200	200	296	296	302	302
1552	1552_2	HOR1369	Hordeum vulgare L. convar. vulgare var. coeleste L.	6	n		Romania	261	261	195	195	196	196	162	177	165	165	266	266	264	264	244	244	264	264	214	214	224	224	286	286	278	278	278	278	216	216	264	264	207	207	336	336	196	212	296	296	302	302
1553	1553_3	BCC1478	Hordeum vulgare L. convar. vulgare var. asiaticum (Vavilov) Mansf.	6	n		Russia	261	261	195	195	196	196	177	177	165	165	266	266	264	264	244	244	264	264	214	214	224	224	286	286	278	278	278	278	216	216	264	264	207	207	336	336	212	212	296	296	302	302
1554	1554_4	HOR7428	Hordeum vulgare L. convar. vulgare var. nuditonsum (Körn.) Mansf.	6	n		Russia	261	261	210	210	202	202	177	177	165	165	202	202	258	258	244	244	254	254	214	214	224	224	286	286	276	276	278	278	213	213	258	258	210	210	351	351	208	208	296	296	294	294
1555	1555_1	HOR8268	Hordeum vulgare L. convar. vulgare var. himalayense (Rittig) Körn.	6	n		Russia	261	261	210	210	200	200	174	174	165	165	250	250	267	267	246	246	258	258	214	214	224	224	284	284	274	274	276	276	210	210	267	267	210	210	336	336	208	208	296	296	300	300
1556	1556_2	HOR11293	Hordeum vulgare L. convar. vulgare var. coeleste L.	6	n		Switzerland	261	261	195	195	196	196	180	180	165	165	266	266	264	264	244	244	254	254	214	214	224	224	286	286	278	278	282	282	216	216	264	264	210	210	336	336	212	212	296	296	302	302
1557	1557_4	HOR211	Hordeum vulgare L. convar. vulgare var. coeleste L.	6	n		Ukraine	261	261	195	195	196	196	177	177	165	165	266	266	264	264	244	244	264	264	214	214	224	224	286	286	278	278	278	278	216	216	264	264	207	207	336	336	212	212	296	296	302	302
Excluded from analyses
244	244_4	HOR10617*	Hordeum vulgare L. convar. distichon (L.) Alef. var. nigrescens Körn.	2	H		Iraq	351	351	-99999	-99999	-99999	-99999	-99999	-99999	-99999	-99999	-99999	-99999	-99999	-99999	-99999	-99999	-99999	-99999	-99999	-99999	228	228	290	290	-99999	-99999	-99999	-99999	213	213	-99999	-99999	-99999	-99999	-99999	-99999	-99999	-99999	-99999	-99999	-99999	-99999
354	354_1	HOR7352*	Hordeum vulgare L. convar. distichon (L.) Alef. var. nutans (Rode) Alef.	2	H		Slovakia	-99999	-99999	-99999	-99999	200	202	-99999	-99999	-99999	-99999	-99999	-99999	-99999	-99999	-99999	-99999	-99999	-99999	-99999	-99999	224	224	-99999	-99999	-99999	-99999	-99999	-99999	213	213	-99999	-99999	-99999	-99999	-99999	-99999	-99999	-99999	-99999	-99999	-99999	-99999
358	358_1	HOR7356*	Hordeum vulgare L. convar. distichon (L.) Alef. var. nutans (Rode) Alef.	2	H		Slovakia	-99999	-99999	-99999	-99999	202	202	-99999	-99999	174	174	238	238	-99999	-99999	244	244	-99999	-99999	-99999	-99999	228	228	290	290	282	282	-99999	-99999	216	216	-99999	-99999	-99999	-99999	351	351	-99999	-99999	-99999	-99999	-99999	-99999
847	847_3	HOR3998*	Hordeum vulgare L. convar. vulgare var. hybernum Viborg	6	H		Greece	-99999	-99999	-99999	-99999	206	206	-99999	-99999	174	174	-99999	-99999	-99999	-99999	-99999	-99999	250	250	212	212	-99999	-99999	-99999	-99999	274	274	-99999	-99999	213	213	-99999	-99999	210	210	-99999	-99999	-99999	-99999	-99999	-99999	302	302
[truncated: 2 more rows]
[truncated: 43 more columns]

## Sheet: 01matrix
Entry no.	Accession name	Taxonomical classification	Row type (2 vs. 6)	Naked/Hulled	Row type (further information)	Country of origin	M1	M2	M3	M4	M5	M6	M7	M8	M9	M10	M11	M12	M13	M14	M15	M16	M17	M18	M19	M20	M21	M22	M23	M24	M25	M26	M27	M28	M29	M30	M31	M32	M33	M34	M35	M36	M37	M38	M39	M40	M41	M42	M43
[truncated: 1,492 more rows]
[truncated: 329 more columns]
